# Supplementary material for: Bio-Chemoinformatics-Driven Analysis of nsp7 and nsp8 Mutations and Their Effects on Viral Replication Protein Complex Stability
Source: MDPI journal article supplement (doi:10.3390/cimb46030165), 2024-03-18

Supplementary Dataset S6. Non-covalent interactions for critical interaction residues of nsp7.

K7 (WT)

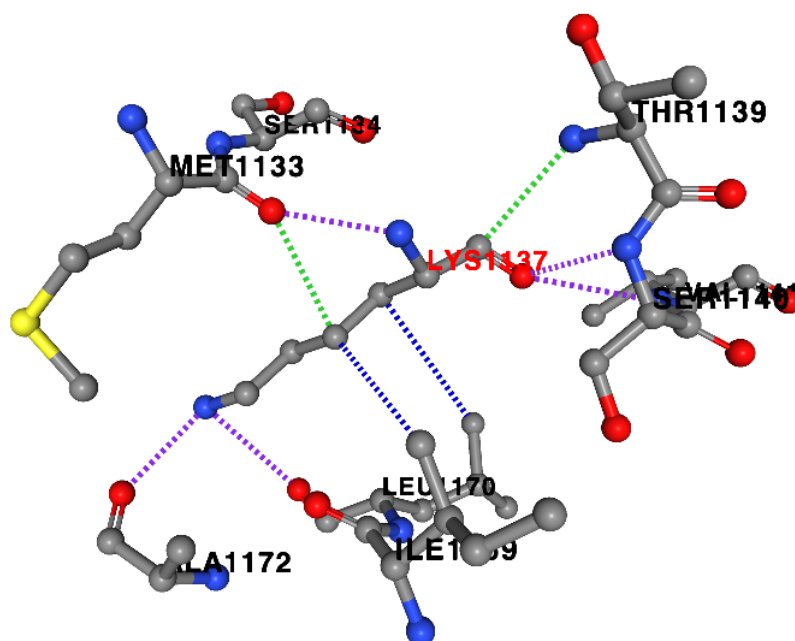

K7L

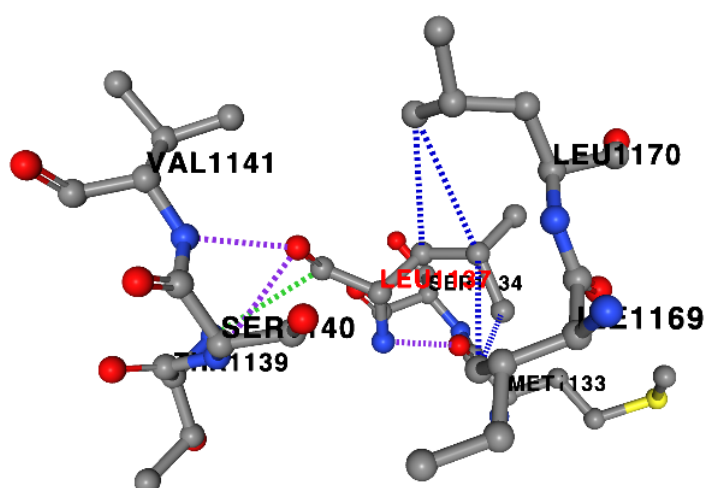

K7F

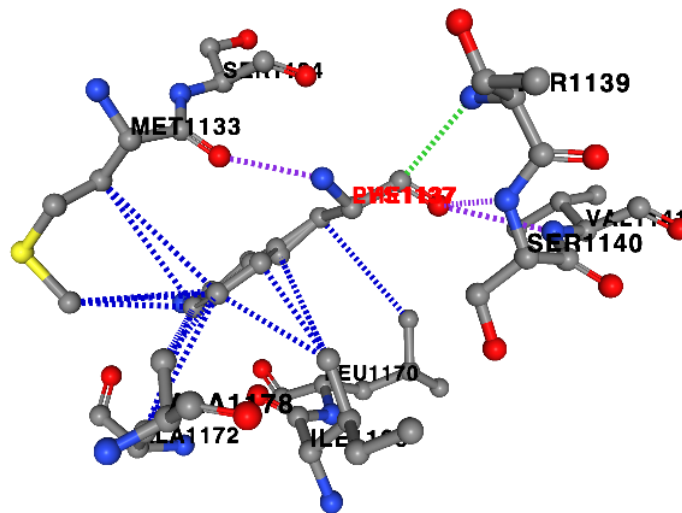

K7I

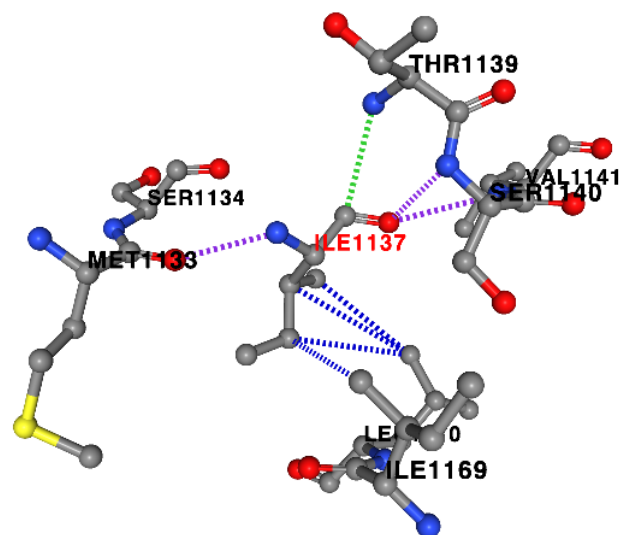

K7D

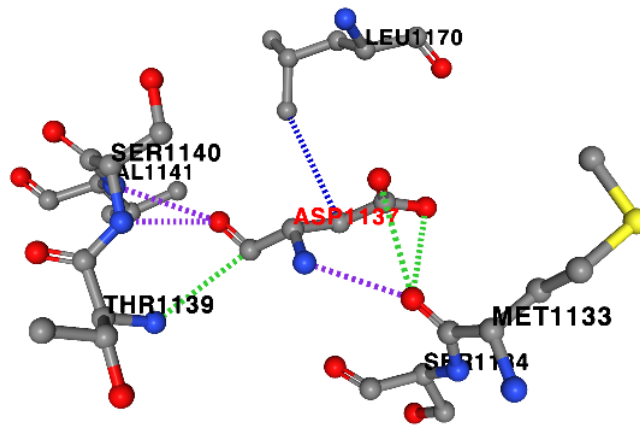

K7P

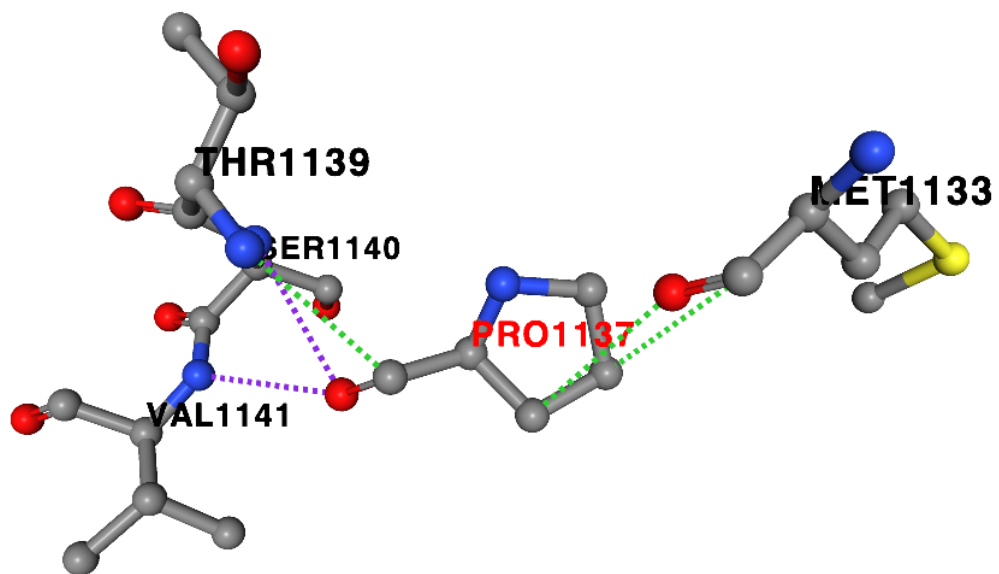

K7G

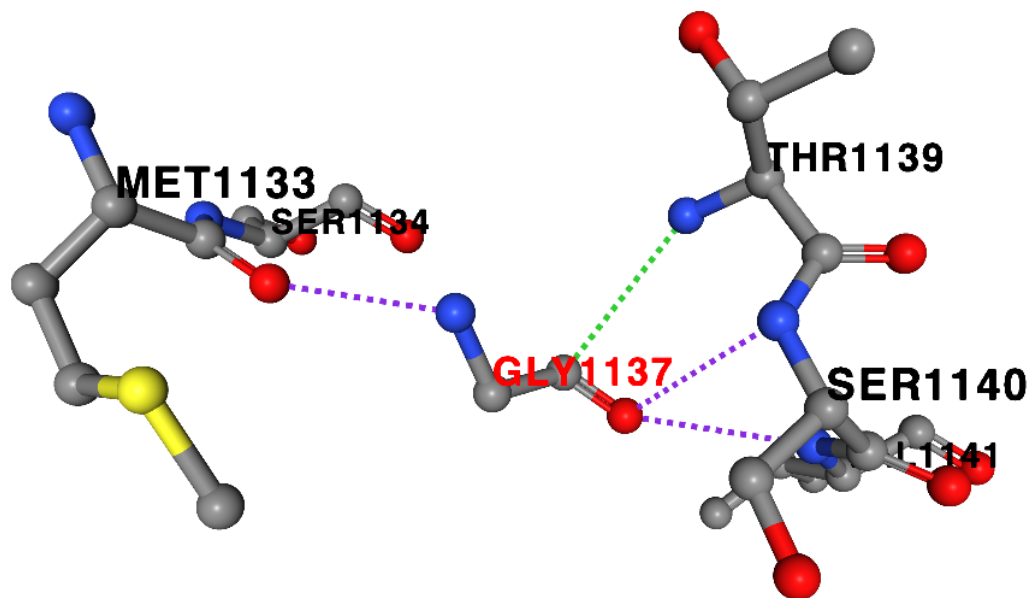

H36 (WT)

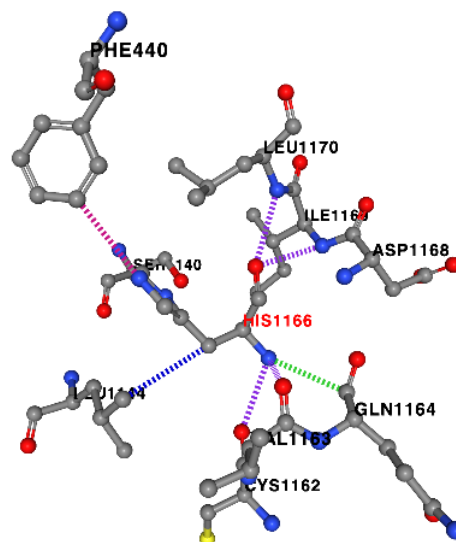

H36Y

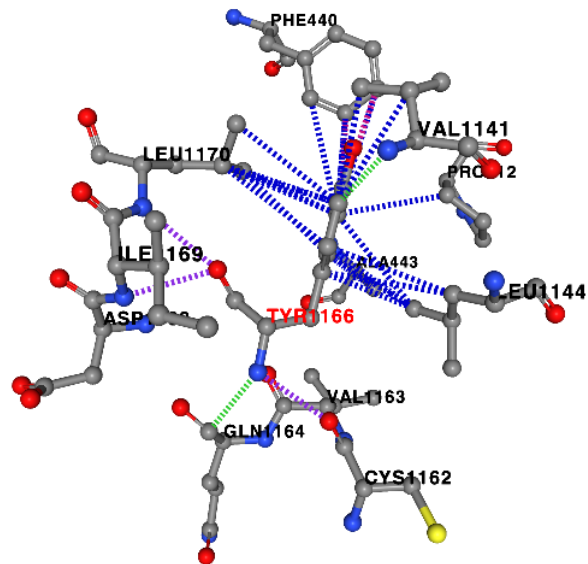

H36L

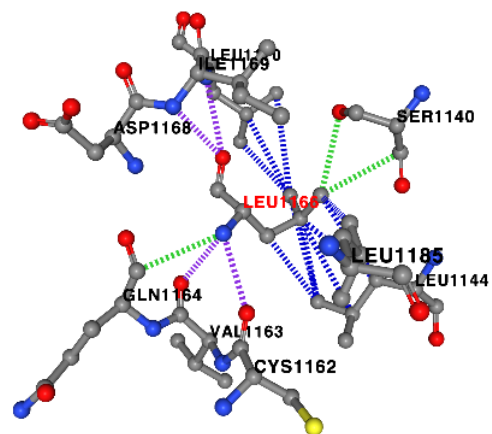

H36F

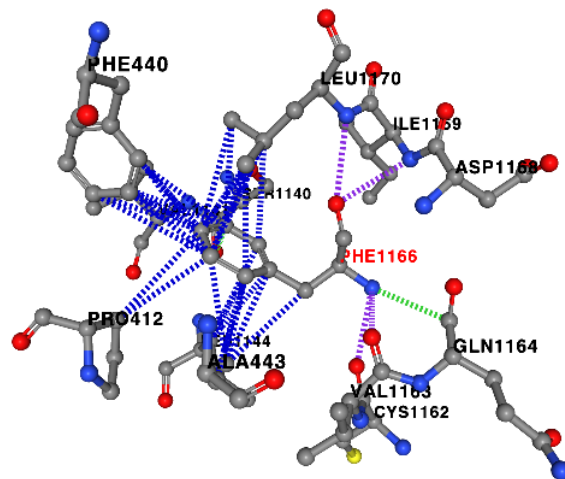

H36R

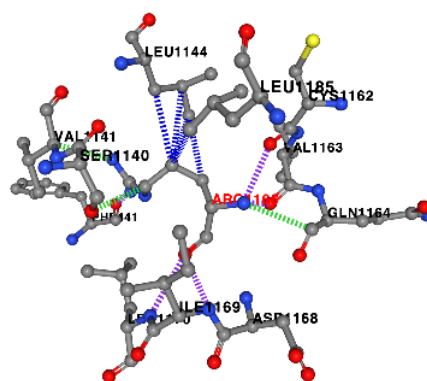

H36G

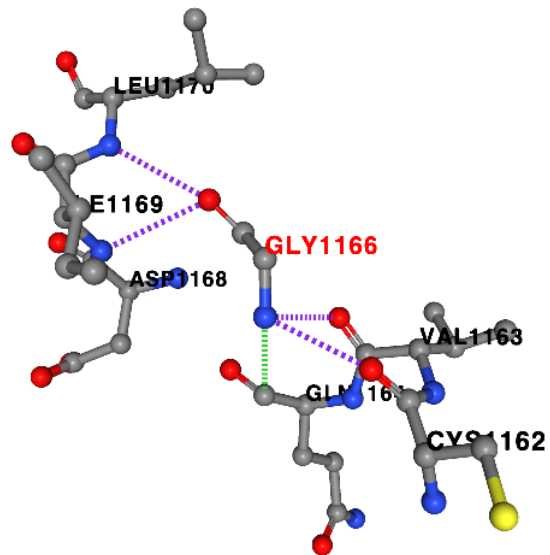

H36Q

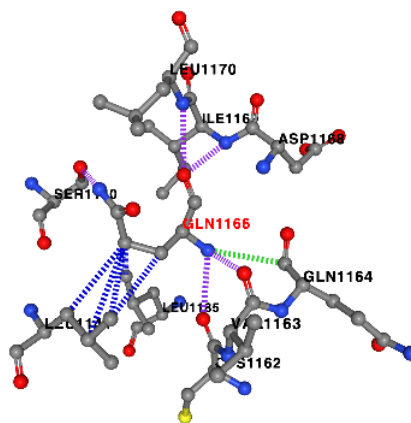

N37 (WT)

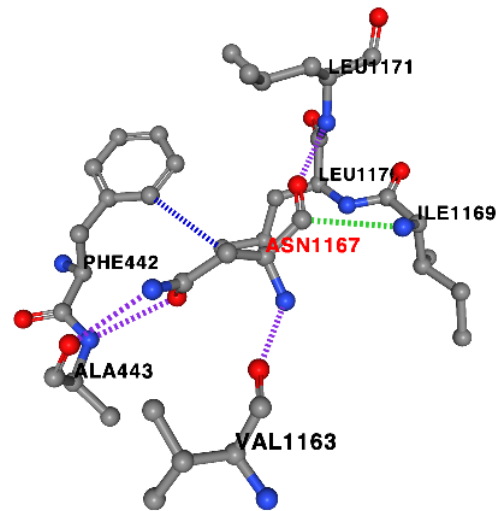

N37L

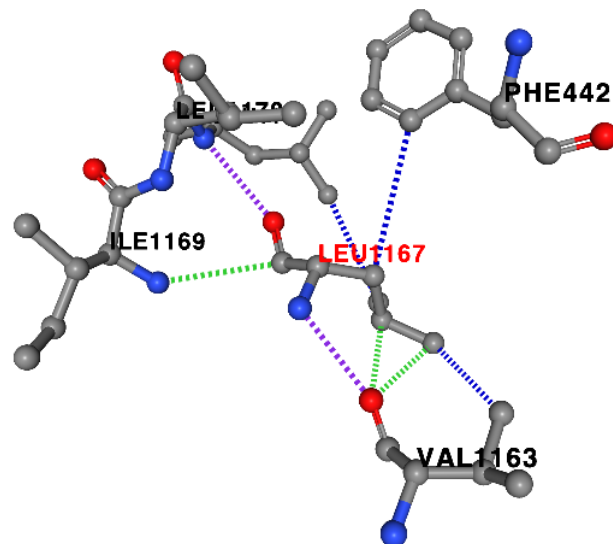

N37I

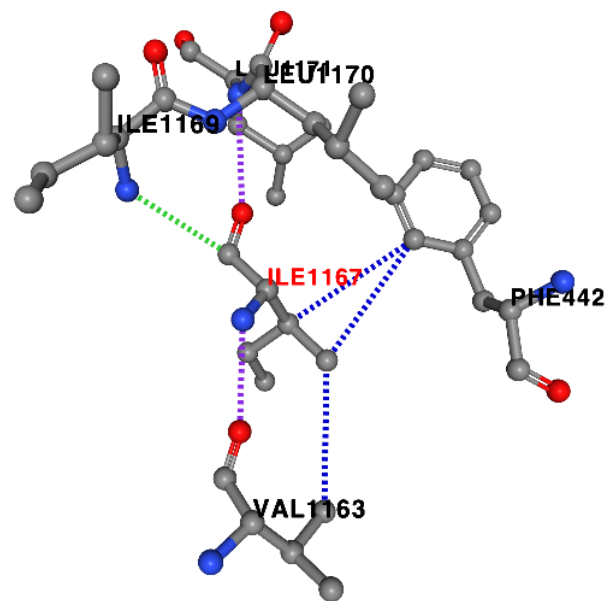

N37L

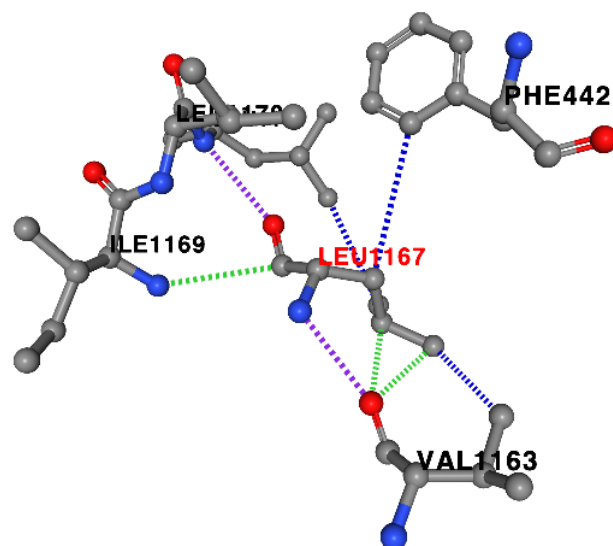

N37P

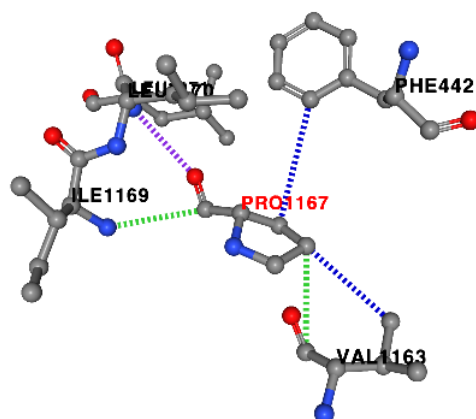

N37G

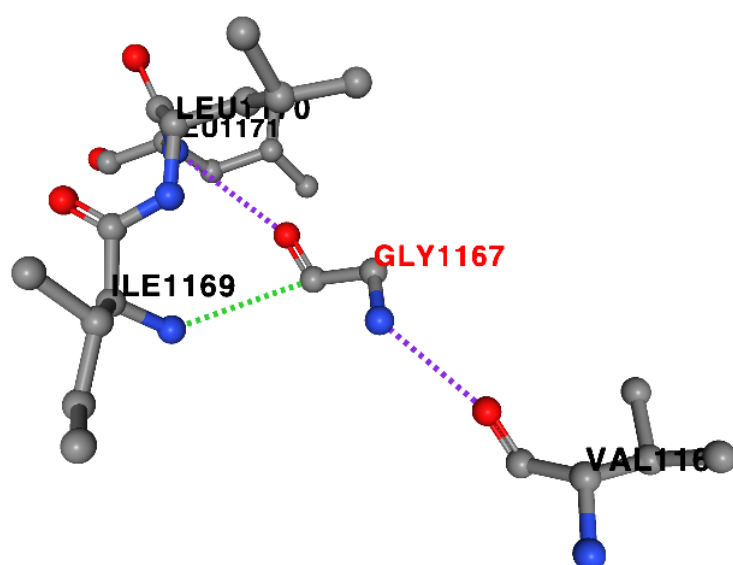

N37K

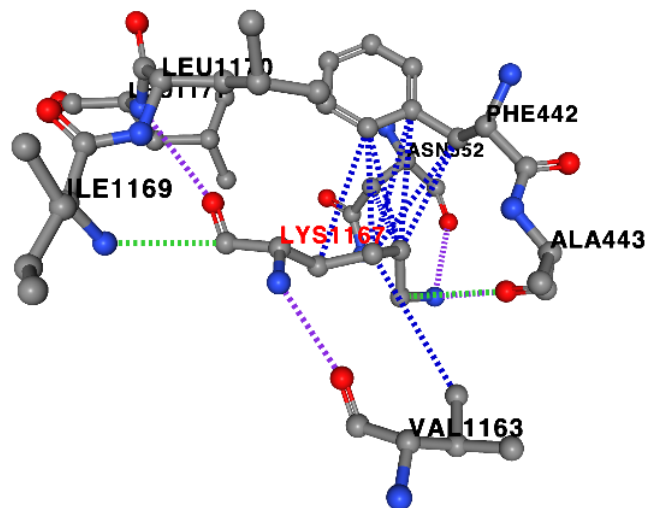

Legend:

Hydrogen Bond

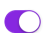

Aromatic

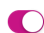

Polar

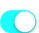

Ionic

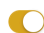

Hydrophobic

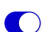

Carbonyl

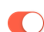

Clash

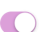

VDW

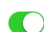

Supplement: s1 [file s1]
