# Supplementary material for: Bio-Chemoinformatics-Driven Analysis of nsp7 and nsp8 Mutations and Their Effects on Viral Replication Protein Complex Stability
Source: MDPI journal article supplement (doi:10.3390/cimb46030165), 2024-03-18
Supplement: s1 [file s1]

Supplementary Dataset S10. Hydrogen bonding interactions in the potential hotspot residues in nsp8.

**Trp-154 (B W1086A; D W1367A):**

**B-chain:**

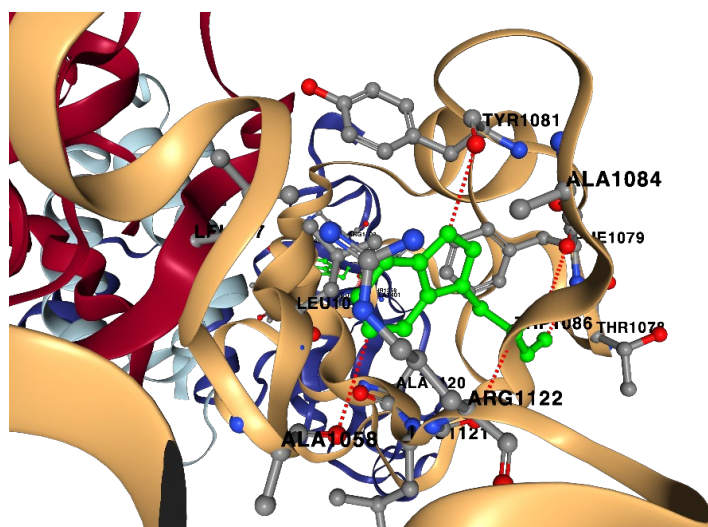

**D-chain:**

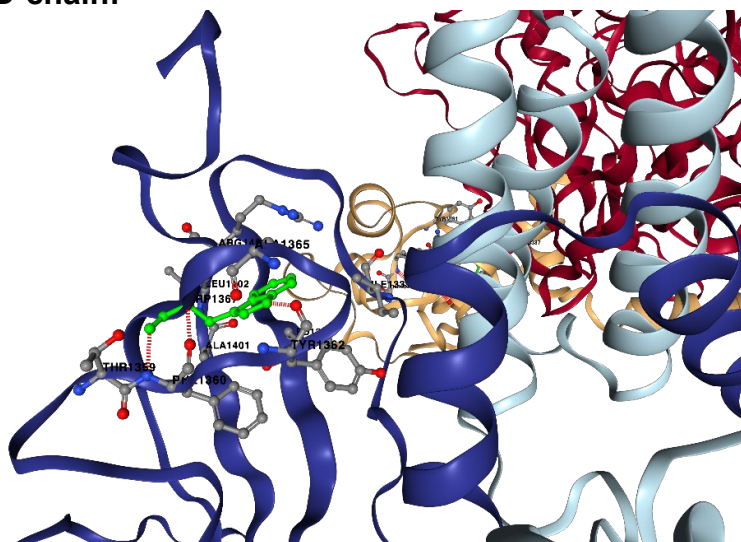

**Tyr-135 (B Y1067A; D Y1348A)**

**B-chain and D-chain:**

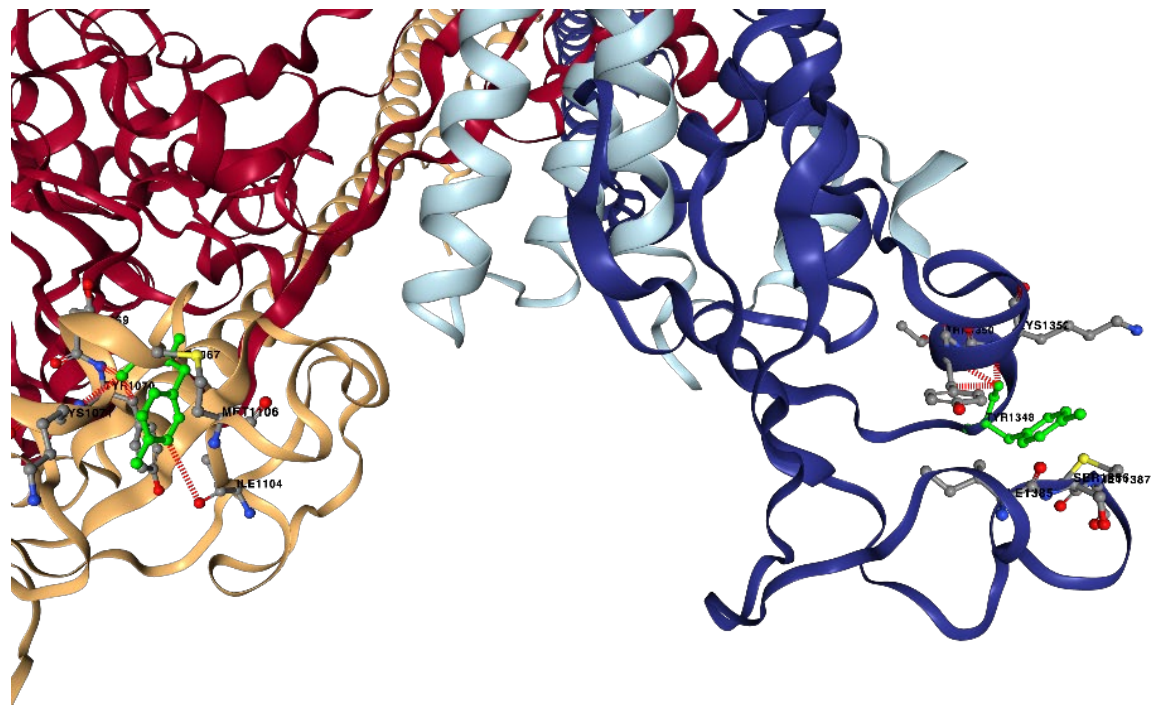

**Phe-15 (B F947A; D 1228A)**

**B-chain and D-chain:**

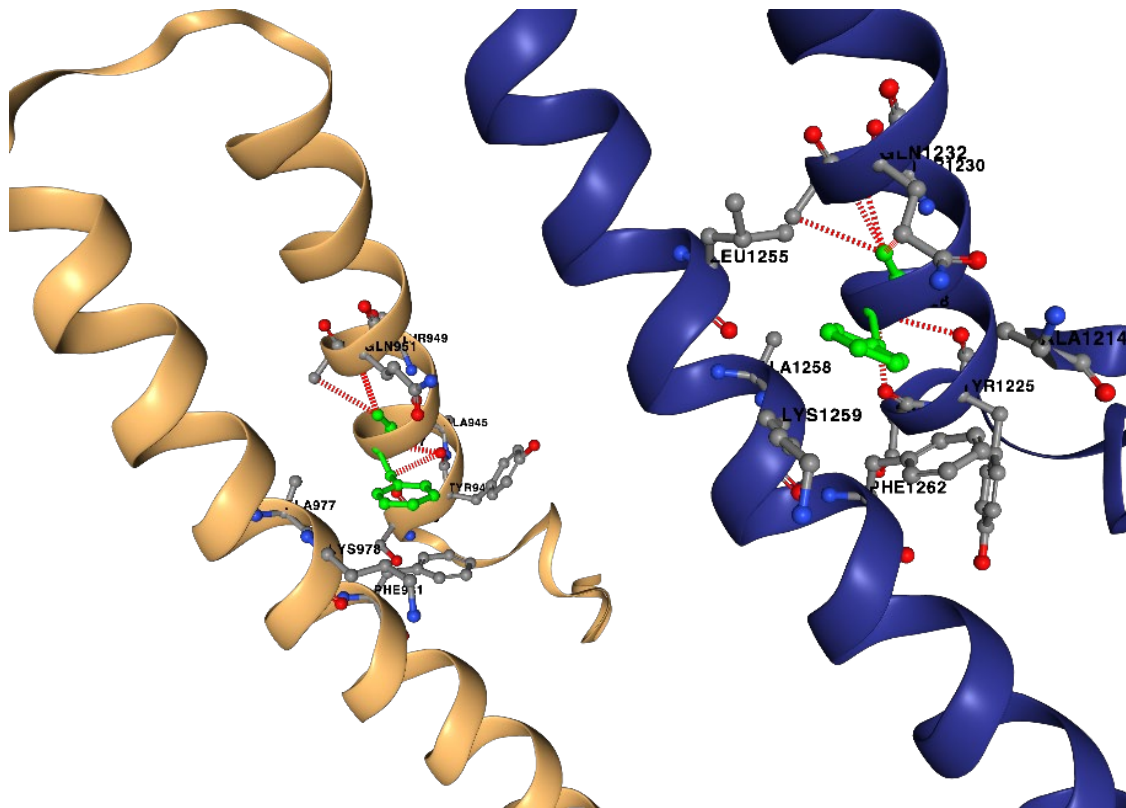

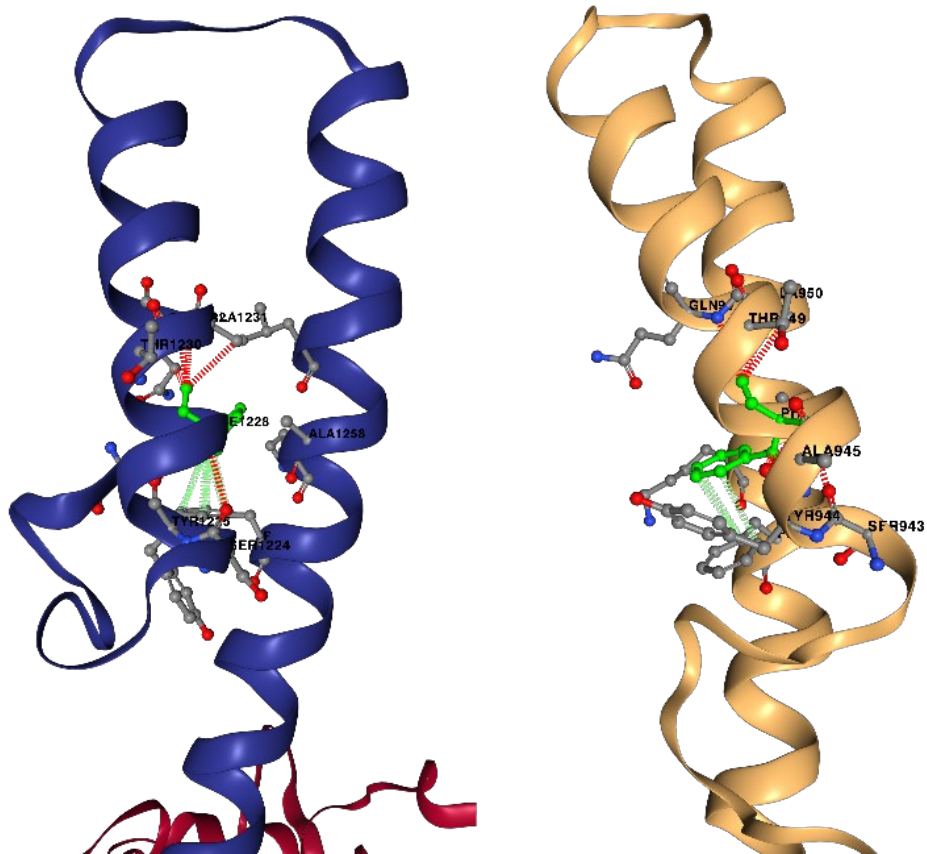

Note: Light-green dotted lines represent aromatic interaction.
