# Supplementary material for: Bio-Chemoinformatics-Driven Analysis of nsp7 and nsp8 Mutations and Their Effects on Viral Replication Protein Complex Stability
Source: MDPI journal article supplement (doi:10.3390/cimb46030165), 2024-03-18
Supplement: s1 [file s1]

Supplementary Dataset S1. Reference sequences of nsp7 and nsp8 for Conserve Domain Database (CDD) Analysis.

| NCBI Reference (Nsp7)        | Description                                           |
|------------------------------|-------------------------------------------------------|
| <a href="#">6NUR_C</a>       | Severe acute respiratory syndrome-related coronavirus |
| <a href="#">1YSY_A</a>       | Severe acute respiratory syndrome-related coronavirus |
| <a href="#">2AHM_A</a>       | SARS coronavirus                                      |
| <a href="#">6WIQ_A</a>       | Severe acute respiratory syndrome coronavirus 2       |
| <a href="#">6WTC_C</a>       | Severe acute respiratory syndrome coronavirus 2       |
| <a href="#">7BV2_C</a>       | Severe acute respiratory syndrome coronavirus 2       |
| <a href="#">AAP33696</a>     | SARS coronavirus Frankfurt 1                          |
| <a href="#">ADY69163</a>     | Zaria bat coronavirus                                 |
| <a href="#">YP_009072438</a> | Bat Hp-betacoronavirus/Zhejiang2013                   |
| <a href="#">P0C6T6</a>       | Rousettus bat coronavirus HKU9                        |
| <a href="#">AOG30811</a>     | Rousettus bat coronavirus                             |
| <a href="#">AWV67038</a>     | Bat coronavirus                                       |
| <a href="#">AGT28265</a>     | Betacoronavirus Erinaceus/VMC/DEU/2012                |
| <a href="#">QGA70691</a>     | Erinaceus hedgehog coronavirus HKU31                  |
| <a href="#">AUM60023</a>     | Middle East respiratory syndrome-related coronavirus  |
| <a href="#">P0C6W4</a>       | Pipistrellus bat coronavirus HKU5                     |
| <a href="#">BBJ36006</a>     | Bat coronavirus                                       |

|                          |                                                      |
|--------------------------|------------------------------------------------------|
| <a href="#">ASL68951</a> | Hypsugo bat coronavirus HKU25                        |
| <a href="#">AVV62535</a> | Middle East respiratory syndrome-related coronavirus |
| <a href="#">P0C6W3</a>   | Tylonycteris bat coronavirus HKU4                    |
| <a href="#">K9N7C7</a>   | Betacoronavirus England 1                            |
| <a href="#">ANA96038</a> | Bat coronavirus                                      |
| <a href="#">P0C6W9</a>   | Bovine coronavirus Mebus                             |
| <a href="#">P0C6X4</a>   | Human coronavirus HKU1 (isolate N5)                  |
| <a href="#">ATP66731</a> | Rodent coronavirus                                   |
| <a href="#">P0C6V0</a>   | Murine hepatitis virus strain A59                    |

| NCBI Reference (Nsp8)     | Description                                           |
|---------------------------|-------------------------------------------------------|
| <a href="#">2AHM_E</a>    | SARS coronavirus                                      |
| <a href="#">7BV1_B</a>    | Severe acute respiratory syndrome-related coronavirus |
| <a href="#">6NUR_B</a>    | Severe acute respiratory syndrome-related coronavirus |
| <a href="#">6NUS_B</a>    | Severe acute respiratory syndrome-related coronavirus |
| <a href="#">7BV2_B</a>    | Severe acute respiratory syndrome-related coronavirus |
| <a href="#">2AHM_H</a>    | SARS coronavirus                                      |
| <a href="#">NP_828850</a> | Severe acute respiratory syndrome-related coronavirus |
| <a href="#">P0C6V9</a>    | Bat CoV 279/2005                                      |

|                                     |                                                      |
|-------------------------------------|------------------------------------------------------|
| <a href="#"><u>P0C6W2</u></a>       | Bat SARS coronavirus HKU3                            |
| <a href="#"><u>P0C6F7</u></a>       | Bat coronavirus (BtCoV/133/2005)                     |
| <a href="#"><u>P0C6T4</u></a>       | Tylonycteris bat coronavirus HKU4                    |
| <a href="#"><u>P0C6T5</u></a>       | Pipistrellus bat coronavirus HKU5                    |
| <a href="#"><u>P0C6T6</u></a>       | Rousettus bat coronavirus HKU9                       |
| <a href="#"><u>P0C6U3</u></a>       | Human coronavirus HKU1 (isolate N1)                  |
| <a href="#"><u>P0C6V0</u></a>       | Murine hepatitis virus strain A59                    |
| <a href="#"><u>AIG13097</u></a>     | Coronavirus Neoromicia/PML-PHE1/RSA/2011             |
| <a href="#"><u>YP_009072438</u></a> | Bat Hp-betacoronavirus/Zhejiang2013                  |
| <a href="#"><u>AJA91214</u></a>     | Betacoronavirus HKU24                                |
| <a href="#"><u>AOG30811</u></a>     | Rousettus bat coronavirus                            |
| <a href="#"><u>ASL68952</u></a>     | Hypsugo bat coronavirus HKU25                        |
| <a href="#"><u>ATP66760</u></a>     | Rodent coronavirus                                   |
| <a href="#"><u>AUM60013</u></a>     | Middle East respiratory syndrome-related coronavirus |
| <a href="#"><u>AVV62524</u></a>     | Middle East respiratory syndrome-related coronavirus |
| <a href="#"><u>AWV67046</u></a>     | Bat coronavirus                                      |
| <a href="#"><u>QCC20711</u></a>     | Hedgehog coronavirus 1                               |
| <a href="#"><u>QEI22730</u></a>     | Betacoronavirus BtCoV22/29                           |
| <a href="#"><u>BBJ36007</u></a>     | Bat coronavirus                                      |
| <a href="#"><u>QGA70691</u></a>     | Erinaceus hedgehog coronavirus HKU31                 |
| <a href="#"><u>AAP33696</u></a>     | SARS coronavirus Frankfurt 1                         |
