# Supplementary material for: Bio-Chemoinformatics-Driven Analysis of nsp7 and nsp8 Mutations and Their Effects on Viral Replication Protein Complex Stability
Source: MDPI journal article supplement (doi:10.3390/cimb46030165), 2024-03-18

Supplementary Dataset S4. Hydrophobic interactions in threonine to isoleucine mutation of nsp8

**T145I:**

**Native structure (B-chain)**

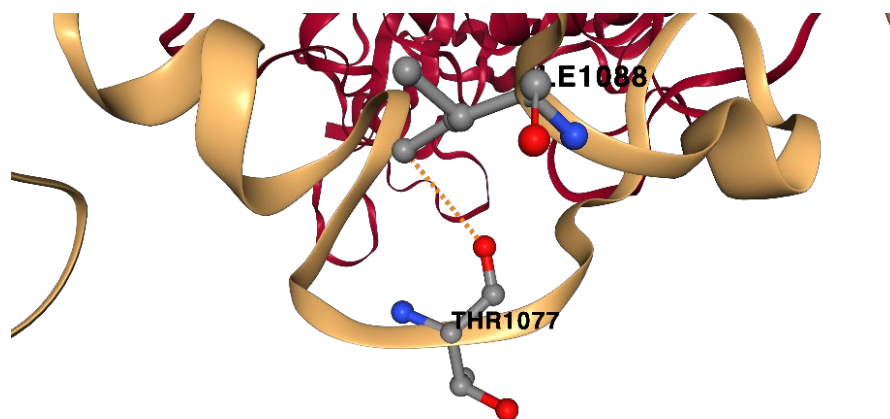

**Mutant structure (B-chain)**

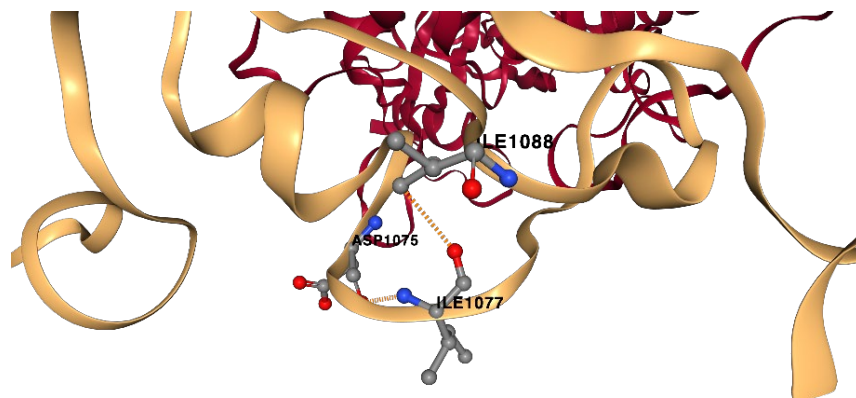

**T148I**

**Native structure (B-chain)**

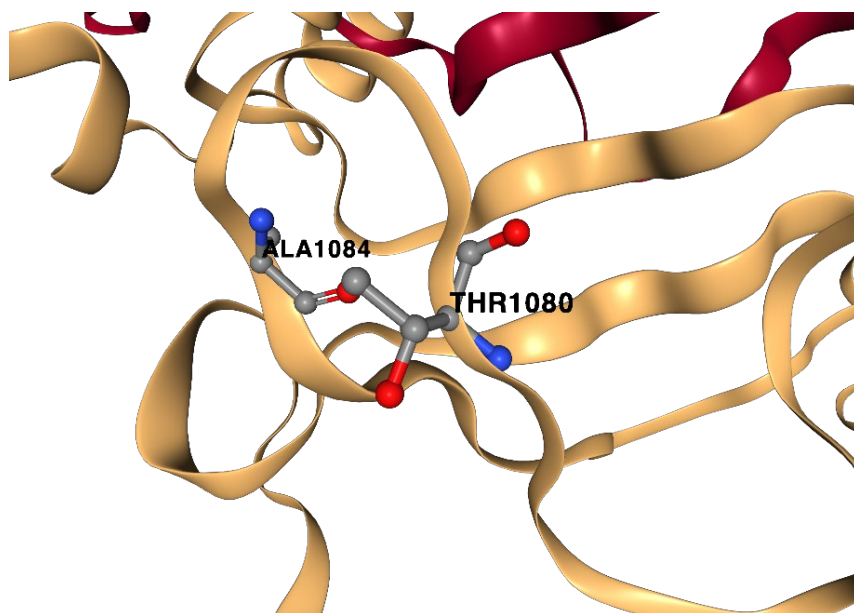

**Mutant structure (D-chain)**

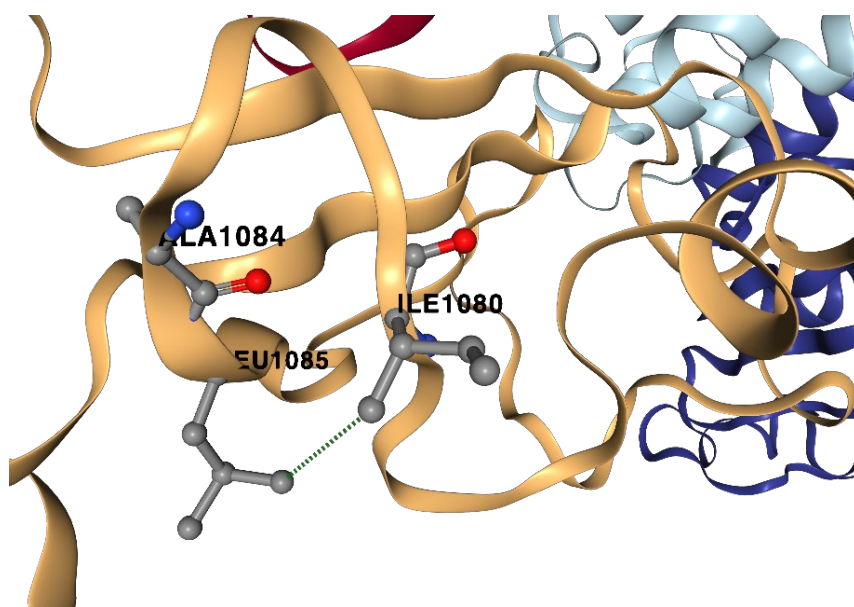

**Native structure (D-chain)**

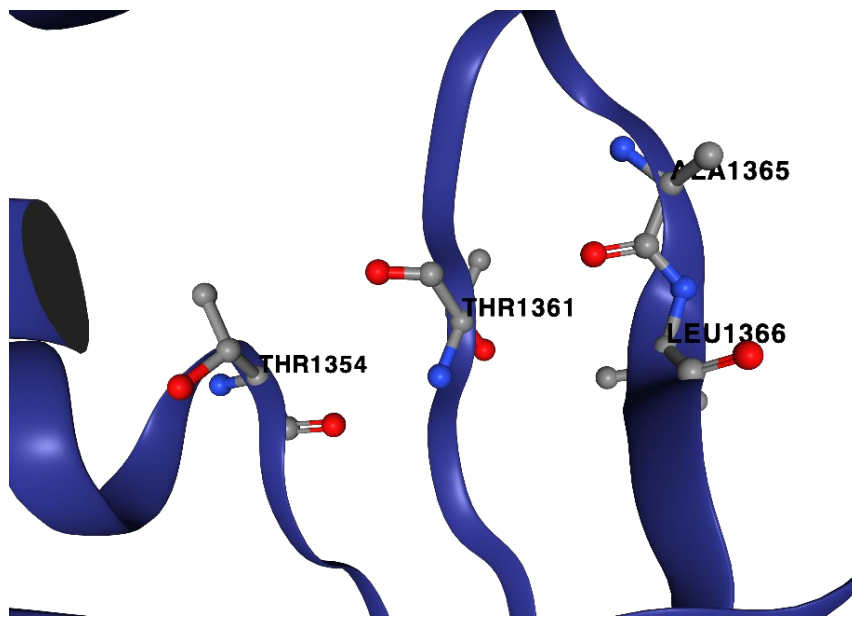

**Mutant structure (D-chain)**

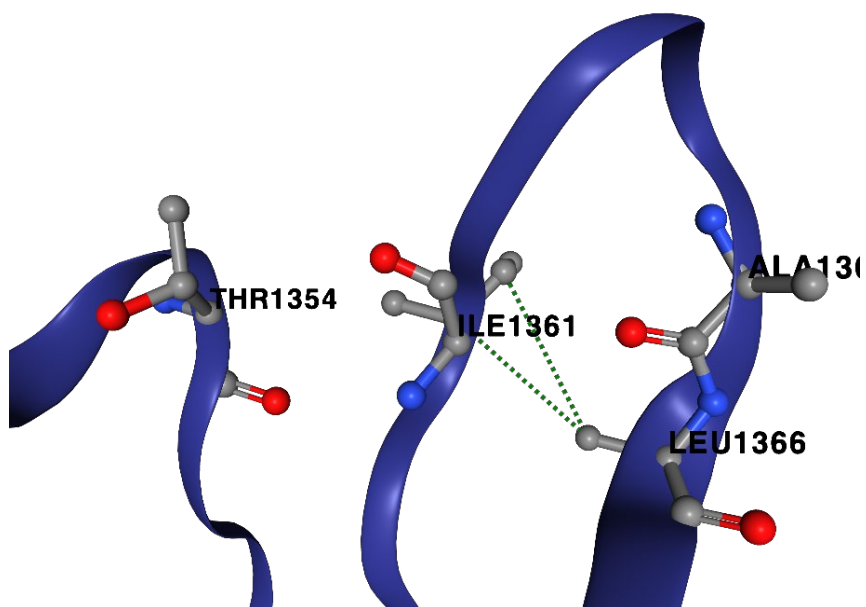

T123I

Native structure (B-chain)

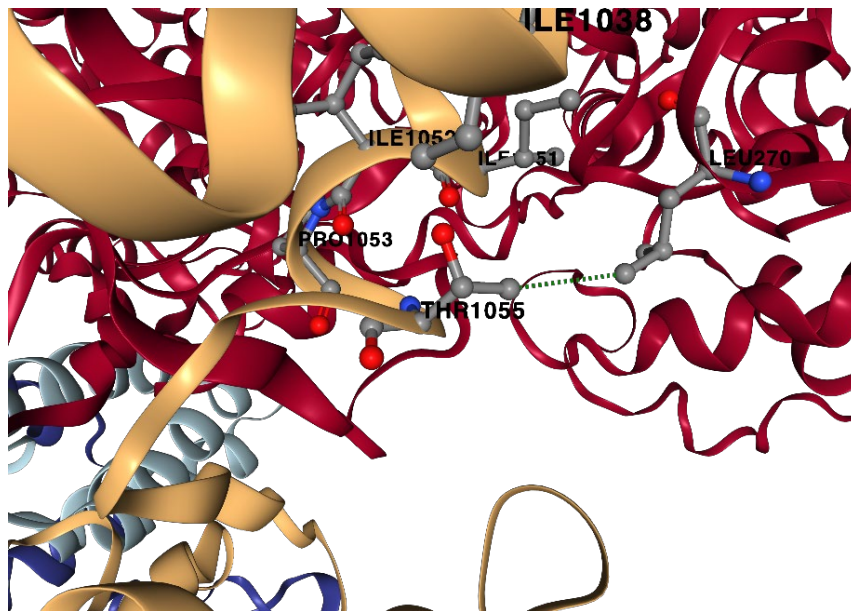

Mutant structure (B-chain)

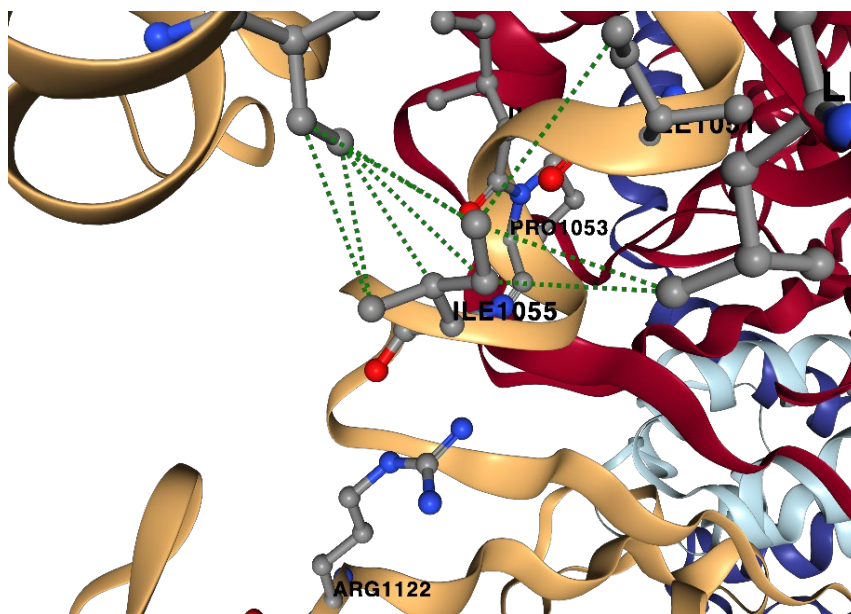

T187I

Native structure (B-chain)

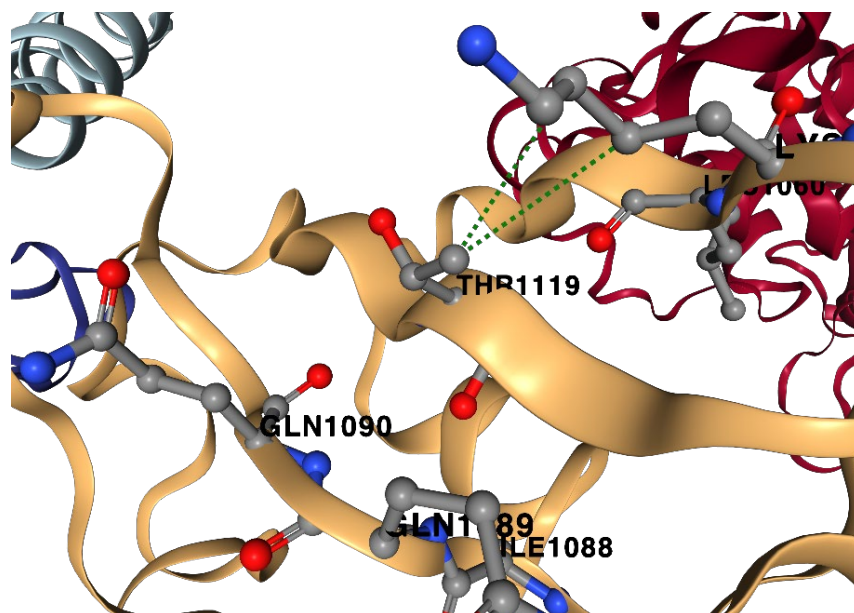

Mutant structure (B-chain)

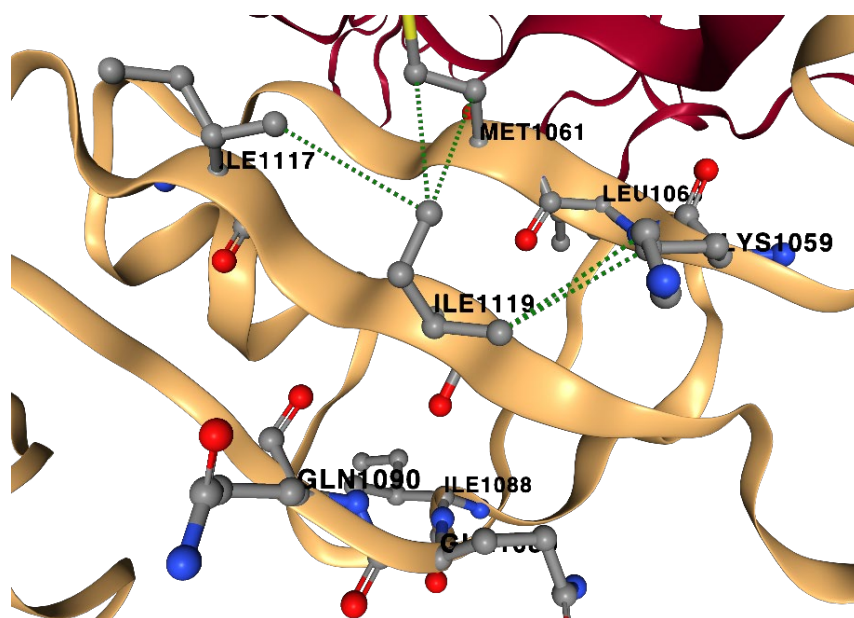

Supplement: s1 [file s1]
