# Supplementary material for: Bio-Chemoinformatics-Driven Analysis of nsp7 and nsp8 Mutations and Their Effects on Viral Replication Protein Complex Stability
Source: MDPI journal article supplement (doi:10.3390/cimb46030165), 2024-03-18
Supplement: s1 [file s1]

Supplementary Dataset S2. Native protein sequences of nsp12, nsp7 and nsp8.

**nsp7 [Severe acute respiratory syndrome coronavirus 2]**

NCBI Reference Sequence: YP\_009725303.1

>YP\_009725303.1 nsp7 [Severe acute respiratory syndrome coronavirus 2]  
SKMSDVKCTSVVLLSVLQQLRVESSSKLWAQCVQLHNDILLAKDTTEAFEKMOVSLLSV  
LLSMQGAVDINKLCEEMLDNRATLQ

**nsp8 [Severe acute respiratory syndrome coronavirus 2]**

NCBI Reference Sequence: YP\_009725304.1

>YP\_009725304.1 nsp8 [Severe acute respiratory syndrome coronavirus 2]  
AIASEFSSLPSYAAFATAQEAYEQAVANGDSEVVLKKLKKSLNVAKSEFDRDAAMQRK  
LEKMADQAMTQMYKQARSEDKRAKVTSAMQTMFTMLRKLDNDALNNIINNARDGCV  
PLNIPLTTAAKLMVVIPDYNKYNTCDGTTFTYASALWEIQQVVDADSKIVQLSEISMDN  
SPNLAWPLIVTALRANSVAVKLQ

**nsp12 RNA-dependent RNA polymerase [Severe acute respiratory syndrome coronavirus 2]**

NCBI Reference Sequence: YP\_009725307.1

>YP\_009725307.1 RNA-dependent RNA polymerase [Severe acute respiratory  
syndrome coronavirus 2]  
SADAQSFLNRVCGVSAARLTPCGTGTSTDVVYRAFDIYNDKVAGFAKFLKTNCCRFQE  
KDEDDNLIDSYFVVKRHTFSNYQHEETIYNLLKDCPAVAKHDFKFRIDGDMVPHISRQ  
RLTKYTMADLVYALRHFDGNCDTLKEILVTYNCCDDYFNKKDWYDFVENPDILRVY  
ANLGERVRQALLKTVQFCDAMRNAGIVGVLTLDNQDLNGNWDYDFGDFIQTPGSGVP  
VVDSYYSLMPILTLTRALTAESHVDTDLTKPYIKWDLLKYDFTEERLKLFDRIYFKYWD  
QTYHPNCVNCLDDRCILHCANFNVLVSTVFPPTSFGPLVRKIFVDGVPFVSTGYHFRE  
LGVVHNQDVNLHSSRLSFKELLVYAADPAMHAASGNLLLDKRTTCFSVAALTNNVAFQ  
TVKPGNFNKFDFYDFAVSKGFFKEGSSVELKHFFFAQDGNAAISDYDYRYNLPTMCDI  
RQLLFVVEVVDKYFDCYDGGCINANQVIVNNLDKSAGFPFNKWGKARLYYDSMSYED  
QDALFAYTKRNVIPITITQMNLYAISAKNRARTVAGVSICSTMTNRQFHQKLLKSIAATR  
GATVVIGTSKFYGGWHNMLKTVYSDVENPHLMGWDYPKCDRAMPNMLRIMASLVLA  
RKHTTCCSLSHRFYRLANCAQVLSEMVMCGGSLYVKPGGTSSGDATTAYANSVFNI  
CQAVTANVNALLSTDGNKIADKYVRNLQHRLYECLYRNRDVTDFVNEFYAYLRKHFS  
MMILSDDAVVCFNSTYASQGLVASIKNFKSVLYYQNNVFMSEAKCWTETDLTKGPHEF  
CSQHTMLVKQGDDYVYLPYPDPSPRILGAGCFVDDIVKTDGTLMIERFVSLAIDAYPLTK  
HPNQEYADVHLYLQYIRKLHDELTGHMLDMYSVMLTNDNTSRYWEPEFYEAMYTPH  
TVLQ
