# Supplementary material for: Bio-Chemoinformatics-Driven Analysis of nsp7 and nsp8 Mutations and Their Effects on Viral Replication Protein Complex Stability
Source: Curr Issues Mol Biol. 2024 Mar 18;46(3):2598–619. doi: 10.3390/cimb46030165 (PMC10968879; doi:10.3390/cimb46030165)
Supplement: Supplementary file 1 [file cimb-46-00165-s001.zip]

Archive with 12 entries (12 files):
- Supplementary Dataset S1. Reference sequences of nsp7 and nsp8 for Conserve Domain Database (CDD) Analysis.pdf
- Supplementary Dataset S10. Hydrogen bonding interactions in the potential hotspot residues in nsp8.pdf
- Supplementary Dataset S2. Native protein sequences of nsp12, nsp7 and nsp8.pdf
- Supplementary Dataset S3. Temporal mutation of nsp7 and nsp8 (2022- 2023).xlsx
- Supplementary Dataset S4. Hydrophobic interactions in threonine to isoleucine mutation of nsp8.pdf
- Supplementary Dataset S5. Double mutation analysis for P121X, L122X.xlsx
- Supplementary Dataset S6. Non-covalent interactions for critical interaction residues of nsp7.pdf
- Supplementary Dataset S7. Non-covalent interactions for critical interaction residues of nsp8.pdf
- Supplementary Dataset S8. Computational alanine scan of the viral replication complex.xlsx
- Supplementary Dataset S9. Statistics of amino acid contributions to viral replication protein complex stability.xlsx
- Supplementary Figure S1. Experimental Workflow.pdf
- Supplementary Figure S2. Multiple sequence alignment.pdf
