# Supplementary material for: Bio-Chemoinformatics-Driven Analysis of nsp7 and nsp8 Mutations and Their Effects on Viral Replication Protein Complex Stability
Source: Curr Issues Mol Biol. 2024 Mar 18;46(3):2598–619. doi: 10.3390/cimb46030165 (PMC10968879; doi:10.3390/cimb46030165)
Supplement: Supplementary file 1 [file cimb-46-00165-s001.zip › Supplementary Dataset S3. Temporal mutation of nsp7 and nsp8 (2022- 2023).xlsx]

## Sheet: Nsp7 May 2022
Nsp7 sequences based on May 2022
Name	Description	Sequence
BDE34828.1:3860-3942 (1752217)	nsp7 [polyprotein=ORF1a polyprotein] [organism=Severe acute respiratory syndrome coronavirus 2] [isolate=hCoV-19/Japan/SZ-NIG-3-C11460/2021]	SKMSDVKCTSVVLLSVLQQLRVESSSKLWAQCVQLHNDILLAKDTTEAFEKMVSLLSVLLSMQGAVDINKLCEEMLDNRATLQ
BDE35186.1:3860-3942 (3449)	nsp7 [polyprotein=ORF1a polyprotein] [organism=Severe acute respiratory syndrome coronavirus 2] [isolate=hCoV-19/Japan/SZ-NIG-3-C11714/2021]	SKMSDVKCTSVVLLSVLQQLRVESSSKLWAQCVQLHNDILLAKDTTEAFEKMVSLLSVLLSMQGAVDINKFCEEMLDNRATLQ
QJI07292.1:3860-3942 (3058)	nsp7 [polyprotein=ORF1ab polyprotein] [organism=Severe acute respiratory syndrome coronavirus 2] [isolate=SARS-CoV-2/human/USA/VA-DCLS-0109/2020]	SKMSDVKCTSVVLLSVLQQLRVESLSKLWAQCVQLHNDILLAKDTTEAFEKMVSLLSVLLSMQGAVDINKLCEEMLDNRATLQ
BCX28680.1:3860-3942 (1765)	nsp7 [polyprotein=ORF1a polyprotein] [organism=Severe acute respiratory syndrome coronavirus 2] [isolate=hCoV-19/Japan/Donner426/2021]	SKMSDVKCTSVVLLSVLQQLRVESSSKLWAQCVQLHNDILLAKDTTEAFEKMVSLLSVLLSMQGAVDINKLCEEMLNNRATLQ
QMT51059.1:3860-3942 (1580)	nsp7 [polyprotein=ORF1ab polyprotein] [organism=Severe acute respiratory syndrome coronavirus 2] [isolate=SARS-CoV-2/human/USA/WA-S2296/2020]	SKMSDVKCTSVVLLSVLQQLRVESSSKLWAQCVQLHNDILLAKDTTEAFEKMVSLLSVLLSMQGAVDINKLCEEILDNRATLQ
BDD89702.1:3860-3942 (1339)	nsp7 [polyprotein=ORF1a polyprotein] [organism=Severe acute respiratory syndrome coronavirus 2] [isolate=hCoV-19/Japan/SZ-NIG-Y21768/2021]	SKMSDVKCTSVVLLSVLQQLRVESSSKLWAQCVQLHNDILLAKDTTEAFEKMVSLLSVLLSMQGAVDINKLCEEMLDNRAILQ
QKT21288.1:3860-3942 (1222)	nsp7 [polyprotein=ORF1ab polyprotein] [organism=Severe acute respiratory syndrome coronavirus 2] [isolate=SARS-CoV-2/human/USA/NY-QDX-105/2020]	SKISDVKCTSVVLLSVLQQLRVESSSKLWAQCVQLHNDILLAKDTTEAFEKMVSLLSVLLSMQGAVDINKLCEEMLDNRATLQ
QRY10764.1:3860-3942 (1212)	nsp7 [polyprotein=ORF1ab polyprotein] [organism=Severe acute respiratory syndrome coronavirus 2] [isolate=SARS-CoV-2/human/USA/CO-CDPHE-2008181628/2020]	SKMSDVKCTSVVLLSVLQQLRVESSSKLWAQCVQLHNDILLAKDTTEAFEKMVSLLSVLLSMRGAVDINKLCEEMLDNRATLQ
QOE75252.1:3860-3942 (1112)	nsp7 [polyprotein=ORF1ab polyprotein] [organism=Severe acute respiratory syndrome coronavirus 2] [isolate=SARS-CoV-2/human/USA/UT-08764/2020]	SKMSDVKCTSVVLLSVLQQLRVESSSKLWAQCIQLHNDILLAKDTTEAFEKMVSLLSVLLSMQGAVDINKLCEEMLDNRATLQ
QKE22921.1:3860-3942 (1052)	nsp7 [polyprotein=ORF1ab polyprotein] [organism=Severe acute respiratory syndrome coronavirus 2] [isolate=SARS-CoV-2/human/USA/UNC_200216_2020/2020]	SKMSDVKCTSVVLLSVLQQLRVESSFKLWAQCVQLHNDILLAKDTTEAFEKMVSLLSVLLSMQGAVDINKLCEEMLDNRATLQ
QMJ01063.1:3860-3942 (770)	nsp7 [polyprotein=ORF1ab polyprotein] [organism=Severe acute respiratory syndrome coronavirus 2] [isolate=SARS-CoV-2/human/USA/SEARCH-1089-SAN/2020]	SKMSDVKCTSVVLLSVLQQLRVESSSKLWAQCVQLHNDILLAKDTTEAFEKMVSLFSVLLSMQGAVDINKLCEEMLDNRATLQ
QMT56430.1:3860-3942 (754)	nsp7 [polyprotein=ORF1ab polyprotein] [organism=Severe acute respiratory syndrome coronavirus 2] [isolate=SARS-CoV-2/human/USA/WA-S2634/2020]	SKMSDVKCTSVVLLSVLQQLRVESSSKLWAQCVQLHNDILLAKDTTEAFEKMVSLLSVLLSMQGAIDINKLCEEMLDNRATLQ
QQN00475.1:3860-3942 (752)	nsp7 [polyprotein=ORF1ab polyprotein] [organism=Severe acute respiratory syndrome coronavirus 2] [isolate=SARS-CoV-2/human/USA/CA-LACPHL-AF00121/2021]	SKMSDVKCTSVVLLSVLQQLRVESSSKLWAQCVQLHNDILLAKDTTEAFEKMVSLLSVLLSMQGAVDINKLCEEMLDSRATLQ
QKC05126.1:3860-3942 (606)	nsp7 [polyprotein=ORF1ab polyprotein] [organism=Severe acute respiratory syndrome coronavirus 2] [isolate=SARS-CoV-2/human/USA/VI-CDC-03083819-001/2020]	SKMSDVKCTSVVLLSVLQQLRVESSSKLWAQCVQLHNDVLLAKDTTEAFEKMVSLLSVLLSMQGAVDINKLCEEMLDNRATLQ
QOH26272.1:3860-3942 (588)	nsp7 [polyprotein=ORF1ab polyprotein] [organism=Severe acute respiratory syndrome coronavirus 2] [isolate=SARS-CoV-2/human/USA/VA-DCLS-1337/2020]	SKMSDVKCTSVVLLSVLQQLRVESSSKLWAQCVQLHNDILLAKDTTEAFEKMVSLLSVLFSMQGAVDINKLCEEMLDNRATLQ
BDE30891.1:3860-3942 (454)	nsp7 [polyprotein=ORF1a polyprotein] [organism=Severe acute respiratory syndrome coronavirus 2] [isolate=hCoV-19/Japan/SZ-NIG-Y211749/2021]	SKMSDVKCTSVVLLSVLQQLRVESSSKLWAQCVQLHNDILLAKDITEAFEKMVSLLSVLLSMQGAVDINKLCEEMLDNRATLQ
QKX65074.1:3860-3942 (392)	nsp7 [polyprotein=ORF1ab polyprotein] [organism=Severe acute respiratory syndrome coronavirus 2] [isolate=SARS-CoV-2/human/EGY/CUNCI-HGC5I015/2020]	SKMSDVKCTSVVLLSVLQQLRVESSSKLWAQCVQLHNDILLAKDTTEAFGKMVSLLSVLLSMQGAVDINKLCEEMLDNRATLQ
QQN04026.1:3860-3942 (376)	nsp7 [polyprotein=ORF1ab polyprotein] [organism=Severe acute respiratory syndrome coronavirus 2] [isolate=SARS-CoV-2/human/USA/MA-MGH-03468/2020]	SKMSDVKCTSVVLLSVLQQLRVESSSKLWVQCVQLHNDILLAKDTTEAFEKMVSLLSVLLSMQGAVDINKLCEEMLDNRATLQ
UFI72991.1:3860-3942 (372)	nsp7 [polyprotein=ORF1ab polyprotein] [organism=Severe acute respiratory syndrome coronavirus 2] [isolate=SARS-CoV-2/human/USA/MN-CDC-IBX326205164758/2021]	SKMSDVKCTSVVLLSVLQQLRVESSSKLWAQCVQLHNDILLAKATTEAFEKMVSLLSVLLSMQGAVDINKLCEEMLDNRATLQ
UHT20280.1:3856-3938 (318)	nsp7 [polyprotein=ORF1ab polyprotein] [organism=Severe acute respiratory syndrome coronavirus 2] [isolate=SARS-CoV-2/human/USA/FL-CDC-STM-BWNPP9XXV/2021]	SKMSDVKCTSVVLLSVLQQLRVESSSKLWAQCVQLXNDILLAKDTTEAFEKMVSLLSVLLSMQGAVDINKLCEEMLDNRATLQ
QOF09675.1:3860-3942 (316)	nsp7 [polyprotein=ORF1ab polyprotein] [organism=Severe acute respiratory syndrome coronavirus 2] [isolate=SARS-CoV-2/human/USA/CT-QDX-428/2020]	SKMSDVKCTSVVLLSVLQQLRVESSSKLWAQCVQLHNDILLAKDTTEAFEKMVSLLSVLLSMQGAVDINKLCEEMLDNRVTLQ
QQP29870.1:3860-3942 (278)	nsp7 [polyprotein=ORF1ab polyprotein] [organism=Severe acute respiratory syndrome coronavirus 2] [isolate=SARS-CoV-2/human/USA/GA-CDC-3887094-001/2020]	SKMSDVKCTSVVLLSVLQQLRVESSSKLWAQCVQLHNDILLAKDTTEAFEKMVSLLSVLLSMHGAVDINKLCEEMLDNRATLQ
QOF08103.1:3860-3942 (260)	nsp7 [polyprotein=ORF1ab polyprotein] [organism=Severe acute respiratory syndrome coronavirus 2] [isolate=SARS-CoV-2/human/USA/MI-QDX-305/2020]	SKMSDVKCTSVVLLSVLQQLRVESSSKLWAQCVQLHNDILLVKDTTEAFEKMVSLLSVLLSMQGAVDINKLCEEMLDNRATLQ
QNO30430.1:3860-3942 (248)	nsp7 [polyprotein=ORF1ab polyprotein] [organism=Severe acute respiratory syndrome coronavirus 2] [isolate=SARS-CoV-2/human/USA/MN-MDH-1562/2020]	SKMSDVKCTSVVLLSVLQQLRVESSSKLWAQCVQLHNDIILAKDTTEAFEKMVSLLSVLLSMQGAVDINKLCEEMLDNRATLQ
QRC46751.1:3860-3942 (238)	nsp7 [polyprotein=ORF1ab polyprotein] [organism=Severe acute respiratory syndrome coronavirus 2] [isolate=SARS-CoV-2/human/USA/VA-CDC-2-4044717/2020]	SKMSDVKCTSVVLLSVLQQLRLESSSKLWAQCVQLHNDILLAKDTTEAFEKMVSLLSVLLSMQGAVDINKLCEEMLDNRATLQ
QVN50586.1:3857-3939 (234)	nsp7 [polyprotein=ORF1ab polyprotein] [organism=Severe acute respiratory syndrome coronavirus 2] [isolate=SARS-CoV-2/human/USA/CO-CDC-MMB08531179/2021]	SKMSDVKCTSVVLLSVLQQLRVXXXXXXXXXXXXXXXDILLAKDTTEAFEKMVSLLSVLLSMQGAVDINKLCEEMLDNRATLQ
QPB13101.1:3860-3942 (230)	nsp7 [polyprotein=ORF1ab polyprotein] [organism=Severe acute respiratory syndrome coronavirus 2] [isolate=SARS-CoV-2/human/USA/MD-MDH-0283/2020]	SKMSDVKCTSVVLLSVLQQFRVESSSKLWAQCVQLHNDILLAKDTTEAFEKMVSLLSVLLSMQGAVDINKLCEEMLDNRATLQ
QQX31869.1:3860-3942 (228)	nsp7 [polyprotein=ORF1ab polyprotein] [organism=Severe acute respiratory syndrome coronavirus 2] [isolate=SARS-CoV-2/human/USA/MD-MDH-0626/2020]	SKMSDVKCTSVVLLSVLQQLRVESSSKLWAQCVQLHNDILLAKDTTEAFEKMVSLLSVLLSIQGAVDINKLCEEMLDNRATLQ
QSE21108.1:3860-3942 (224)	nsp7 [polyprotein=ORF1ab polyprotein] [organism=Severe acute respiratory syndrome coronavirus 2] [isolate=SARS-CoV-2/human/USA/TX-CDC-QDX21759398/2021]	SKMSDVKCTSVVLLSVLQQLRVESSSKLWAQCVQLHNDILLAKDTTEAFEKMVSLLSVLLSMQGAVDINKLCEEMLDNRTTLQ
QRN48457.1:3860-3942 (214)	nsp7 [polyprotein=ORF1ab polyprotein] [organism=Severe acute respiratory syndrome coronavirus 2] [isolate=SARS-CoV-2/human/USA/VA-DCLS-2811/2020]	SKMSDVKCTSVVLLSVLQQLRVESSSKLWAQCVQLHNDILLAKDTTEAFEKMVSLLSALLSMQGAVDINKLCEEMLDNRATLQ
QNO64245.1:3860-3942 (178)	nsp7 [polyprotein=ORF1ab polyprotein] [organism=Severe acute respiratory syndrome coronavirus 2] [isolate=SARS-CoV-2/human/AUS/VIC2996/2020]	SKMSDVKCTSVVLLSVLQQLRVESSSKLWAQCVQLHNDILLAKDTTEAFEKMVSLLSGLLSMQGAVDINKLCEEMLDNRATLQ
QJD25479.1:3860-3942 (178)	nsp7 [polyprotein=ORF1ab polyprotein] [organism=Severe acute respiratory syndrome coronavirus 2] [isolate=SARS-CoV-2/human/USA/NY-PV09187/2020]	SKMSDVKCTSVVLLSVLQQLRVESSSKLWAQCVQLHNDILLAKDTTEAFEKMVSLLSVLLSMQGAVDTNKLCEEMLDNRATLQ
UMQ79939.1:3860-3942 (168)	nsp7 [polyprotein=ORF1ab polyprotein] [organism=Severe acute respiratory syndrome coronavirus 2] [isolate=SARS-CoV-2/human/USA/TN-VUMC-O-0002/2021]	SKMSDVKCTSVVLLSVLQQLRVESSSXXXXXXVQLHNDILLAKDTTEAFEKMVSLLSVLLSMQGAVDINKLCEEMXXXXXXLQ
QOC61265.1:3860-3942 (160)	nsp7 [polyprotein=ORF1ab polyprotein] [organism=Severe acute respiratory syndrome coronavirus 2] [isolate=SARS-CoV-2/human/USA/WI-UW-1247/2020]	SKMSDVKCTSVVLLLVLQQLRVESSSKLWAQCVQLHNDILLAKDTTEAFEKMVSLLSVLLSMQGAVDINKLCEEMLDNRATLQ
QMT55842.1:3860-3942 (146)	nsp7 [polyprotein=ORF1ab polyprotein] [organism=Severe acute respiratory syndrome coronavirus 2] [isolate=SARS-CoV-2/human/USA/WA-S2426/2020]	SKMSDVKCTSVVLLSVFQQLRVESSSKLWAQCVQLHNDILLAKDTTEAFEKMVSLLSVLLSMQGAVDINKLCEEMLDNRATLQ
QLG99233.1:3860-3942 (140)	nsp7 [polyprotein=ORF1ab polyprotein] [organism=Severe acute respiratory syndrome coronavirus 2] [isolate=SARS-CoV-2/human/USA/IL-UW-592/2020]	SKMSDVKCTSVVLLSVLQQLRVESSSKLWAQCVQLHNDILLAKDTTEAFXKMVSLLSVLLSMQGAVDINKLCEEMLDNRATLQ
QOE80859.1:3860-3942 (128)	nsp7 [polyprotein=ORF1ab polyprotein] [organism=Severe acute respiratory syndrome coronavirus 2] [isolate=SARS-CoV-2/human/USA/UT-02760/2020]	SKMSDVKCTSVVLLSVLQQLRVESSSKLWAQCAQLHNDILLAKDTTEAFEKMVSLLSVLLSMQGAVDINKLCEEMLDNRATLQ
QJX70517.1:3860-3942 (128)	nsp7 [polyprotein=ORF1ab polyprotein] [organism=Severe acute respiratory syndrome coronavirus 2] [isolate=SARS-CoV-2/human/USA/WI-UW-362/2020]	SKMSDVKCTSVVLLSVLQQLRVESSSKLWAQCVQLHNDILLAKDTTEAFEKMVSLLSVLLSMQGAVDINNLCEEMLDNRATLQ
BDH42529.1:3856-3938 (127)	nsp7 [polyprotein=ORF1a polyprotein] [organism=Severe acute respiratory syndrome coronavirus 2] [isolate=hCoV-19/Japan/SZ-NIG-4-C5055/2022]	SKMSDVKCTSVVLLSVLQQLRVESSSKLWAQCVQLHNDILLAKDTTEAFEKMVSLLSVLLSMQGVVDINKLCEEMLDNRATLQ
QQH16036.1:3860-3942 (122)	nsp7 [polyprotein=ORF1ab polyprotein] [organism=Severe acute respiratory syndrome coronavirus 2] [isolate=SARS-CoV-2/human/PAK/SARS-CoV-2_32/2020]	SKMSDVKCTSVVLLSVLQQLRVESSSKLWAQCVQLHNDILLAKDTTEAFEKMVSLLSVLLSMQGAVDINKLCEEMLYNRATLQ
QPM29628.1:3860-3942 (122)	nsp7 [polyprotein=ORF1ab polyprotein] [organism=Severe acute respiratory syndrome coronavirus 2] [isolate=SARS-CoV-2/human/USA/WI-UW-1634/2020]	SKMSDVKCTSVVLLSVLQQLRVESSSKLWAQCVQLHNDILLAKDTTEAFEKMVSLLSVLLSMQGAVDINKLCEEVLDNRATLQ
QQE70091.1:3860-3942 (116)	nsp7 [polyprotein=ORF1ab polyprotein] [organism=Severe acute respiratory syndrome coronavirus 2] [isolate=SARS-CoV-2/human/USA/OK-CDC-2-3693789/2020]	SKMSDVKCTSVVLLSVLQQLRVESSSKLWAQCCQLHNDILLAKDTTEAFEKMVSLLSVLLSMQGAVDINKLCEEMLDNRAILQ
QQV35460.1:3860-3942 (114)	nsp7 [polyprotein=ORF1ab polyprotein] [organism=Severe acute respiratory syndrome coronavirus 2] [isolate=SARS-CoV-2/human/USA/KY-CDC-2-3714563/2020]	SKMSDVKCASVVLLSVLQQLRVESSSKLWAQCVQLHNDILLAKDTTEAFEKMVSLLSVLLSMQGAVDINKLCEEMLDNRATLQ
QYB37951.1:3860-3942 (112)	nsp7 [polyprotein=ORF1ab polyprotein] [organism=Severe acute respiratory syndrome coronavirus 2] [isolate=SARS-CoV-2/human/USA/NC-CDC-QDX26573616/2021]	SKMSDVKCTSVVLLSVLQQLRVESSSRLWAQCVQLHNDILLAKDTTEAFEKMVSLLSVLLSMQGAVDINKLCEEMLDNRATLQ
QTC56249.1:3860-3942 (106)	nsp7 [polyprotein=ORF1ab polyprotein] [organism=Severe acute respiratory syndrome coronavirus 2] [isolate=SARS-CoV-2/human/USA/FL-CDC-STM-000015183/2021]	SKMSDVKCTSVVLLSVLQQLRVESSSKLWAQCVQLHNDILLAKDTTEAFEKTVSLLSVLLSMQGAVDINKLCEEMLDNRATLQ
QTM87881.1:3857-3939 (104)	nsp7 [polyprotein=ORF1ab polyprotein] [organism=Severe acute respiratory syndrome coronavirus 2] [isolate=SARS-CoV-2/human/USA/CA-CDC-QDX22786690/2021]	SKMSDVKCTSVVLLSVLQRLRVESSSKLWAQCVQLHNDILLAKDTTEAFEKMVSLLSVLLSMQGAVDINKLCEEMLDNRATLQ
QOH26512.1:3860-3942 (104)	nsp7 [polyprotein=ORF1ab polyprotein] [organism=Severe acute respiratory syndrome coronavirus 2] [isolate=SARS-CoV-2/human/USA/VA-DCLS-1288/2020]	SKMSDVKCTSVVLLSVLQQLRVESSSKLWAQCVQLHNDTLLAKDTTEAFEKMVSLLSVLLSMQGAVDINKLCEEMLDNRATLQ
QOF11307.1:3860-3942 (98)	nsp7 [polyprotein=ORF1ab polyprotein] [organism=Severe acute respiratory syndrome coronavirus 2] [isolate=SARS-CoV-2/human/USA/MI-QDX-560/2020]	SKMSDVKCTSVVLLSVLQQLRVESSSKLWAQCVQLHNDILLAKDTTEAFEKMVSLLSILLSMQGAVDINKLCEEMLDNRATLQ
QKU31467.1:3860-3942 (96)	nsp7 [polyprotein=ORF1ab polyprotein] [organism=Severe acute respiratory syndrome coronavirus 2] [isolate=SARS-CoV-2/human/USA/CA-CZB-1404/2020]	SKMSDVKCTSVVLLSVLQQLRVESSSKLWAQCVQLHNDILLAKDTTEAFEKMVSLLSVLLSLQGAVDINKLCEEMLDNRATLQ
QNL23791.1:3860-3942 (94)	nsp7 [polyprotein=ORF1ab polyprotein] [organism=Severe acute respiratory syndrome coronavirus 2] [isolate=SARS-CoV-2/human/USA/MD-MDH-0133/2020]	SRMSDVKCTSVVLLSVLQQLRVESSSKLWAQCVQLHNDILLAKDTTEAFEKMVSLLSVLLSMQGAVDINKLCEEMLDNRATLQ
QQP46123.1:3860-3942 (86)	nsp7 [polyprotein=ORF1ab polyprotein] [organism=Severe acute respiratory syndrome coronavirus 2] [isolate=SARS-CoV-2/human/USA/CA-CZB-12951/2020]	SKMSDVKCTSVVLLSVLQQLRVESSSKLWAQCVQLHNDILLAKDTTEAFEKMVLLLSVLLSMQGAVDINKLCEEMLDNRATLQ
QQL90439.1:3860-3942 (82)	nsp7 [polyprotein=ORF1ab polyprotein] [organism=Severe acute respiratory syndrome coronavirus 2] [isolate=SARS-CoV-2/human/USA/UT-UPHL-2012530254/2020]	SKMSDVKCTSVVLLSVLQQLRVESSSKLWAQCVQLHNDILLARDTTEAFEKMVSLLSVLLSMQGAVDINKLCEEMLDNRATLQ
QQX20477.1:3860-3942 (82)	nsp7 [polyprotein=ORF1ab polyprotein] [organism=Severe acute respiratory syndrome coronavirus 2] [isolate=SARS-CoV-2/human/USA/KY-QDX-3515/2020]	SKMSDVKCTSVVLLSVLQQLRVESSSKLWAQCVQLHNDILLAKDTIEAFEKMVSLLSVLLSMQGAVDINKLCEEMLDNRATLQ
QQM99911.1:3860-3942 (80)	nsp7 [polyprotein=ORF1ab polyprotein] [organism=Severe acute respiratory syndrome coronavirus 2] [isolate=SARS-CoV-2/human/USA/NMDOH-2020616240/2020]	SKMSDVKCTSVVLLSVLQQLRVESSSKLWAQCCQLHNDILLAKDTTEAFEKMVSLLSVLLSMQGVVDINKLCEEMLDNRAILQ
QRF70357.1:3860-3942 (78)	nsp7 [polyprotein=ORF1ab polyprotein] [organism=Severe acute respiratory syndrome coronavirus 2] [isolate=SARS-CoV-2/human/USA/CA-QDX-4415/2021]	XXXXXXXXXXXXXXXXLQQLRVESSSKLWAQCVQLHNDILLAKDTTEAFEKMVSLLSVLLSMQGAVDINKLCEEMLDNRATLQ
BDI10396.1:3856-3938 (77)	nsp7 [polyprotein=ORF1a polyprotein] [organism=Severe acute respiratory syndrome coronavirus 2] [isolate=hCoV-19/Japan/SZ-NIG-Y214040/2022]	SKMSDIKCTSVVLLSVLQQLRVESSSKLWAQCVQLHNDILLAKDTTEAFEKMVSLLSVLLSMQGAVDINKLCEEMLDNRATLQ
QSS88064.1:3860-3942 (74)	nsp7 [polyprotein=ORF1ab polyprotein] [organism=Severe acute respiratory syndrome coronavirus 2] [isolate=SARS-CoV-2/human/USA/CT-CDC-QDX22164375/2021]	SKMSDVKCTSVILLSVLQQLRVESSSKLWAQCVQLHNDILLAKDTTEAFEKMVSLLSVLLSMQGAVDINKLCEEMLDNRATLQ
QTP09822.1:3860-3942 (72)	nsp7 [polyprotein=ORF1ab polyprotein] [organism=Severe acute respiratory syndrome coronavirus 2] [isolate=SARS-CoV-2/human/USA/CT-CDC-QDX23205073/2021]	SKMSDVKCTSVVLLSVLQQLRVESSSKLWAQCVQLHNDILLAKGTTEAFEKMVSLLSVLLSMQGAVDINKLCEEMLDNRATLQ
QWY58526.1:3860-3942 (70)	nsp7 [polyprotein=ORF1ab polyprotein] [organism=Severe acute respiratory syndrome coronavirus 2] [isolate=SARS-CoV-2/human/USA/FL-CDC-ASC210107610/2021]	SKMSDVKCTSVVLLSVLQQLRIESSSKLWAQCVQLHNDILLAKDTTEAFEKMVSLLSVLLSMQGAVDINKLCEEMLDNRATLQ
QQV21830.1:3860-3942 (66)	nsp7 [polyprotein=ORF1ab polyprotein] [organism=Severe acute respiratory syndrome coronavirus 2] [isolate=SARS-CoV-2/human/USA/NMDOH-2021013029/2021]	SKMSDVKCTSVVLLSVLQQLRVESSSKLWAQCVQLHNDILLAKDTTEAFEKMVSLLSVLLSMQGAVDINKLCEEMLGNRATLQ
QVG48269.1:3857-3939 (66)	nsp7 [polyprotein=ORF1ab polyprotein] [organism=Severe acute respiratory syndrome coronavirus 2] [isolate=SARS-CoV-2/human/USA/MD-CDC-ASC210030904/2021]	SKMSDVKCTSVVLLSVLQQLRVESSSKLWAQCVRLHNDILLAKDTTEAFEKMVSLLSVLLSMQGAVDINKLCEEMLDNRATLQ
QSJ42296.1:3860-3942 (66)	nsp7 [polyprotein=ORF1ab polyprotein] [organism=Severe acute respiratory syndrome coronavirus 2] [isolate=SARS-CoV-2/human/USA/NC-CDC-STM-000013680/2021]	SKMSDVKCTSVVLLSVLQQLRVESSSKLWAQCVQLHNGILLAKDTTEAFEKMVSLLSVLLSMQGAVDINKLCEEMLDNRATLQ
UFU31992.1:3860-3942 (64)	nsp7 [polyprotein=ORF1ab polyprotein] [organism=Severe acute respiratory syndrome coronavirus 2] [isolate=SARS-CoV-2/human/USA/CO-CDC-MMB11407223/2021]	SKMSDVKCTSVVLLSVLQQLRVXXXXXXXXXXXXXHNDILLAKDTTEAFEKMVSLLSVLLSMQGAVDINKLCEEMLDNRATLQ
QQV35412.1:3860-3942 (64)	nsp7 [polyprotein=ORF1ab polyprotein] [organism=Severe acute respiratory syndrome coronavirus 2] [isolate=SARS-CoV-2/human/USA/AK-CDC-2-3714493/2020]	SKMSDVKCTSVVLLSVLQQLRVESSSKLWAQCVQLHNDILLAKDTTEAFEKMVSLLSVLLSMQGAVDINKLCEETLDNRATLQ
QSV26827.1:3857-3939 (62)	nsp7 [polyprotein=ORF1ab polyprotein] [organism=Severe acute respiratory syndrome coronavirus 2] [isolate=SARS-CoV-2/human/USA/OH-UHTL-176/2021]	SKMSDVKCTSVVLLSVLQQLRVESSSKLWAQCVQLHNDILLTKDTTEAFEKMVSLLSVLLSMQGAVDINKLCEEMLDNRATLQ
QRC44963.1:3860-3942 (62)	nsp7 [polyprotein=ORF1ab polyprotein] [organism=Severe acute respiratory syndrome coronavirus 2] [isolate=SARS-CoV-2/human/USA/DC-CDC-2-4058066/2020]	SKMSDVKCTSVVLLSVLQQLRVESSSKLWAQCVQLHNDILLAKDTTEAFEKIVSLLSVLLSMQGAVDINKLCEEMLDNRATLQ
UFU53681.1:3860-3942 (60)	nsp7 [polyprotein=ORF1ab polyprotein] [organism=Severe acute respiratory syndrome coronavirus 2] [isolate=SARS-CoV-2/human/USA/VA-CDC-QDX30966692/2021]	SKMSDVKCTSVVLLSVLQQLRVESSSKLWAQCVQLHNDILLAKDTTEAFEKMVSLLSVLLSMQGALDINKLCEEMLDNRATLQ
QSE04485.1:3860-3942 (60)	nsp7 [polyprotein=ORF1ab polyprotein] [organism=Severe acute respiratory syndrome coronavirus 2] [isolate=SARS-CoV-2/human/USA/ME-CDC-QDX21679273/2021]	SKMSDVKCTSVVLLSVLQQLRVESSSKLWAQCVQLHNDIFLAKDTTEAFEKMVSLLSVLLSMQGAVDINKLCEEMLDNRATLQ
QRC46847.1:3860-3942 (54)	nsp7 [polyprotein=ORF1ab polyprotein] [organism=Severe acute respiratory syndrome coronavirus 2] [isolate=SARS-CoV-2/human/USA/PA-CDC-2-4122408/2020]	SKMSDVKCISVVLLSVLQQLRVESSSKLWAQCVQLHNDILLAKDTTEAFEKMVSLLSVLLSMQGAVDINKLCEEMLDNRATLQ
QOP80442.1:3860-3942 (54)	nsp7 [polyprotein=ORF1ab polyprotein] [organism=Severe acute respiratory syndrome coronavirus 2] [isolate=SARS-CoV-2/human/AUS/VIC7846/2020]	SKMSDVRCTSVVLLSVLQQLRVESSSKLWAQCVQLHNDILLAKDTTEAFEKMVSLLSVLLSMQGAVDINKLCEEMLDNRATLQ
QXI95240.1:3857-3939 (52)	nsp7 [polyprotein=ORF1ab polyprotein] [organism=Severe acute respiratory syndrome coronavirus 2] [isolate=SARS-CoV-2/human/USA/AL-UAB-GX282/2021]	SKMSDVKCTSVVLLSVLQQLRVESSSKLWAQCVQLHNDILLAKDTTEAFEKXXXXXXXXXXXXXXXXXXKLCEEMLDNRATLQ
QRM36235.1:3860-3942 (50)	nsp7 [polyprotein=ORF1ab polyprotein] [organism=Severe acute respiratory syndrome coronavirus 2] [isolate=SARS-CoV-2/human/IND/GBRC434/2020]	SKMSDVKCTSVVLLSVLQQLRVESSSKLWAQCVQLHNDILLAKDTTEAFEKMVSLLSVLLSMQGAVDINKLCEEMMDNRATLQ
UFR68512.1:3860-3942 (48)	nsp7 [polyprotein=ORF1ab polyprotein] [organism=Severe acute respiratory syndrome coronavirus 2] [isolate=SARS-CoV-2/human/USA/MI-CDC-ATM-29P26NHUD/2021]	SKMSDVKCTSVVLLSVLQQLRVESSSKLWAQCVQLHNDILLAKDTTEAFEKMVSLLSVLLSMQGAVDINKLCEELLDNRATLQ
QNO77625.1:3860-3942 (48)	nsp7 [polyprotein=ORF1ab polyprotein] [organism=Severe acute respiratory syndrome coronavirus 2] [isolate=SARS-CoV-2/human/AUS/VIC4739/2020]	SKMSDVKCTSVVLLSVLQQLRVESSSKLWDQCVQLHNDILLAKDTTEAFEKMVSLLSVLLSMQGAVDINKLCEEMLDNRATLQ
QSV30571.1:3860-3942 (48)	nsp7 [polyprotein=ORF1ab polyprotein] [organism=Severe acute respiratory syndrome coronavirus 2] [isolate=SARS-CoV-2/human/USA/VA-CDC-2-3923976/2021]	SKMSDVKCTSVVLLSVLQQLRVESSSKLWAQCVQLHNDILLAKDTTEAFEKMVSLLSFLLSMQGAVDINKLCEEMLDNRATLQ
QTS49416.1:3857-3939 (46)	nsp7 [polyprotein=ORF1ab polyprotein] [organism=Severe acute respiratory syndrome coronavirus 2] [isolate=SARS-CoV-2/human/USA/FL-CDC-QDX23314241/2021]	SKMSDVKCTSVVLLSVLQQLRVESSSKLWAQCVQLHNDILLAKDTTEAFEKMVSLLSVLLSMQGAVDVNKLCEEMLDNRATLQ
BCX25384.1:3860-3942 (45)	nsp7 [polyprotein=ORF1a polyprotein] [organism=Severe acute respiratory syndrome coronavirus 2] [isolate=hCoV-19/Japan/Donner137/2020]	SKMSDVKCTSVVLLSVLQQLRVESSSKLWARCVQLHNDILLAKDTTEAFEKMVSLLSVLLSMQGAVDINKLCEEMLDNRATLQ
UMZ43601.1:3856-3938 (44)	nsp7 [polyprotein=ORF1ab polyprotein] [organism=Severe acute respiratory syndrome coronavirus 2] [isolate=SARS-CoV-2/human/USA/SC-COVID22-0694/2022]	SKMSDVKCTSVVLLSVLQQLRVESSSKLWSQCVQLHNDILLAKDTTEAFEKMVSLLSVLLSMQGAVDINKLCEEMLDNRATLQ
QQX20105.1:3860-3942 (42)	nsp7 [polyprotein=ORF1ab polyprotein] [organism=Severe acute respiratory syndrome coronavirus 2] [isolate=SARS-CoV-2/human/USA/FL-QDX-3455/2020]	SKMSDVKCTSVVLLSVLQQLRVESSSKLWAQCVQLHNDILLAKDTTEAFEKMVSLLSVLLSMQGAVDINKLCDEMLDNRATLQ
QTW68422.1:3857-3939 (42)	nsp7 [polyprotein=ORF1ab polyprotein] [organism=Severe acute respiratory syndrome coronavirus 2] [isolate=SARS-CoV-2/human/USA/GA-CDC-STM-000046022/2021]	SKMSDVKCTSVVLLSVLQQLRVESSSKLWAQCVQLHNDILLAKDTTEAFEKMVSLISVLLSMQGAVDINKLCEEMLDNRATLQ
QRG23515.1:3860-3942 (42)	nsp7 [polyprotein=ORF1ab polyprotein] [organism=Severe acute respiratory syndrome coronavirus 2] [isolate=SARS-CoV-2/human/USA/MO-QDX-4438/2020]	SKMSDVKCTSVVLLSVLQQLRVESSSKLWAQCVQLHNDILLAKDTAEAFEKMVSLLSVLLSMQGAVDINKLCEEMLDNRATLQ
UMQ87354.1:3860-3942 (40)	nsp7 [polyprotein=ORF1ab polyprotein] [organism=Severe acute respiratory syndrome coronavirus 2] [isolate=SARS-CoV-2/human/USA/TN-VUMC-O-0622/2021]	SKMSDVKCTSVVLLSVLQQLRVESSSKLWAQCVQLHNDILLAKDTTEAFEKMVSLLSVLLSMQGAVDINKLCEEMXXXXXXLQ
QOL21597.1:3860-3942 (38)	nsp7 [polyprotein=ORF1ab polyprotein] [organism=Severe acute respiratory syndrome coronavirus 2] [isolate=SARS-CoV-2/human/SRB/KS-0796-16-04/2020]	SKMSDVKCTSVVLLSVLQQLRVESSSKLWAQCVQLHNDILLAKDTTEAFEKMVSLLSVLLSVQGAVDINKLCEEMLDNRATLQ
QUM41165.1:3860-3942 (36)	nsp7 [polyprotein=ORF1ab polyprotein] [organism=Severe acute respiratory syndrome coronavirus 2] [isolate=SARS-CoV-2/human/USA/CA-CDC-STM-000055528/2021]	SKMSDVKCTSVVLLSVLQQIRVESSSKLWAQCVQLHNDILLAKDTTEAFEKMVSLLSVLLSMQGAVDINKLCEEMLDNRATLQ
QQV44392.1:3860-3942 (36)	nsp7 [polyprotein=ORF1ab polyprotein] [organism=Severe acute respiratory syndrome coronavirus 2] [isolate=SARS-CoV-2/human/USA/UT-UPHL-2101065965/2020]	SKMSDVKCTSVVLLSVLQQLRVESSSKLWAQCVQLHNNILLAKDTTEAFEKMVSLLSVLLSMQGAVDINKLCEEMLDNRATLQ
UGO73081.1:3860-3942 (36)	nsp7 [polyprotein=ORF1ab polyprotein] [organism=Severe acute respiratory syndrome coronavirus 2] [isolate=SARS-CoV-2/human/USA/CO-CDC-MMB11555859/2021]	SKMSDVKCTSVVLLSVLQQLRVESSSXXXXXXXXXHNDILLAKDTTEAFEKMVSLLSVLLSMQGAVDINKLCEEMLDNRATLQ
UHS46594.1:3856-3938 (34)	nsp7 [polyprotein=ORF1ab polyprotein] [organism=Severe acute respiratory syndrome coronavirus 2] [isolate=SARS-CoV-2/human/USA/MD-CDC-MMB12185245/2021]	SKMSDVKCTSVVLLSVLQQLRVESSSKLWAQCVQLHNDILLAKDTTEAFEKXXXXXXXXXXXXXXXXXNKLCEEMLDNRATLQ
QJY51334.1:3860-3942 (34)	nsp7 [polyprotein=ORF1ab polyprotein] [organism=Severe acute respiratory syndrome coronavirus 2] [isolate=SARS-CoV-2/human/ITA/INMI11-N/2020]	SKMSDVKCTSVVLLSVLQQLRVESSSXXXXXXVQLHNDILLAKDTTEAFEKMVSLLSVLLSMQGAVDINKLCEEMLDNRATLQ
QYJ42078.1:3857-3939 (34)	nsp7 [polyprotein=ORF1ab polyprotein] [organism=Severe acute respiratory syndrome coronavirus 2] [isolate=SARS-CoV-2/human/USA/MA-CDC-ASC210155525/2021]	SKMSDVKCTSVVLLSVLQQLRVESSSKLWAQCVQLHNDILLAKDTTEAFEKMVSLLSVLLSMQGAVDINKLCAEMLDNRATLQ
QOT61668.1:3857-3939 (32)	nsp7 [polyprotein=ORF1ab polyprotein] [organism=Severe acute respiratory syndrome coronavirus 2] [isolate=SARS-CoV-2/human/AUS/VIC14326/2020]	SKMSDVKCTSVVLLSVLQQLRVESSSKLWAQCVHLHNDILLAKDTTEAFEKMVSLLSVLLSMQGAVDINKLCEEMLDNRATLQ
QUF10845.1:3857-3939 (32)	nsp7 [polyprotein=ORF1ab polyprotein] [organism=Severe acute respiratory syndrome coronavirus 2] [isolate=SARS-CoV-2/human/USA/VT-CDCBI-CRSP_02185/2021]	SKMSDVKCTSVVLLSVLQQLRVESSSKLWAQCVQLHNDILLAKDTTEAFEKMVSLLSVLLSMQGAVDINKLCGEMLDNRATLQ
QVH25962.1:3860-3942 (32)	nsp7 [polyprotein=ORF1ab polyprotein] [organism=Severe acute respiratory syndrome coronavirus 2] [isolate=SARS-CoV-2/human/USA/FL-CDC-ASC210033669/2021]	SKMSDVKCTSVVLLSVLQQLRVESSSKLWAQCVQLHNDILLAKDTTEAFDKMVSLLSVLLSMQGAVDINKLCEEMLDNRATLQ
QTZ26594.1:3857-3939 (32)	nsp7 [polyprotein=ORF1ab polyprotein] [organism=Severe acute respiratory syndrome coronavirus 2] [isolate=SARS-CoV-2/human/USA/MA-MASPHL-02985/2021]	SKMSDVKCTSVVLLSVLQQLRVESSSKLWAQCVQLHNDILLAKDTTEAFEKMVSLLSVLISMQGAVDINKLCEEMLDNRATLQ
QQX35068.1:3860-3942 (32)	nsp7 [polyprotein=ORF1ab polyprotein] [organism=Severe acute respiratory syndrome coronavirus 2] [isolate=SARS-CoV-2/human/USA/NM-CDC-STM-0000014-B01/2021]	SKVSDVKCTSVVLLSVLQQLRVESSSKLWAQCVQLHNDILLAKDTTEAFEKMVSLLSVLLSMQGAVDINKLCEEMLDNRATLQ
QRV69224.1:3860-3942 (32)	nsp7 [polyprotein=ORF1ab polyprotein] [organism=Severe acute respiratory syndrome coronavirus 2] [isolate=SARS-CoV-2/human/USA/FL-BPHL-0116/2021]	SKMSDVKCTSVVLLSVLQQLRVESSSKLWAQCVQLHNDILLAKDTTDAFEKMVSLLSVLLSMQGAVDINKLCEEMLDNRATLQ
QVU12731.1:3857-3939 (32)	nsp7 [polyprotein=ORF1ab polyprotein] [organism=Severe acute respiratory syndrome coronavirus 2] [isolate=SARS-CoV-2/human/USA/TN-CDC-ASC210073575/2021]	SKMSDVKCTSVVLLSVLQQLRVESSSKVWAQCVQLHNDILLAKDTTEAFEKMVSLLSVLLSMQGAVDINKLCEEMLDNRATLQ
BCX25588.1:3860-3942 (31)	nsp7 [polyprotein=ORF1a polyprotein] [organism=Severe acute respiratory syndrome coronavirus 2] [isolate=hCoV-19/Japan/Donner154/2020]	SKMSDVKCTSVVLLSVLQQLRVESXSKLWAQCVQLHNDILLAKDTTEAFEKMVSLLSVLLSMQGAVDINKLCEEMLDNRATLQ
QTI56012.1:3857-3939 (30)	nsp7 [polyprotein=ORF1ab polyprotein] [organism=Severe acute respiratory syndrome coronavirus 2] [isolate=SARS-CoV-2/human/USA/OH-UHTL-281/2021]	SKMSDVKCTSVVLLSVLQQLRVESSSKLWTQCVQLHNDILLAKDTTEAFEKMVSLLSVLLSMQGAVDINKLCEEMLDNRATLQ
QSX83034.1:3860-3942 (30)	nsp7 [polyprotein=ORF1ab polyprotein] [organism=Severe acute respiratory syndrome coronavirus 2] [isolate=SARS-CoV-2/human/USA/SC-COVID21-0357/2021]	SKMSDVKCTSVVLLSVLQQLRVESSSKLWAQCVQLHNDILLAKDTTGAFEKMVSLLSVLLSMQGAVDINKLCEEMLDNRATLQ
QYL46926.1:3860-3942 (30)	nsp7 [polyprotein=ORF1ab polyprotein] [organism=Severe acute respiratory syndrome coronavirus 2] [isolate=SARS-CoV-2/human/USA/OSPHL01476/2021]	SKMSDVKCTSVVLLSVLQQLGVESSSKLWAQCVQLHNDILLAKDTTEAFEKMVSLLSVLLSMQGAVDINKLCEEMLDNRATLQ
QQV31585.1:3860-3942 (28)	nsp7 [polyprotein=ORF1ab polyprotein] [organism=Severe acute respiratory syndrome coronavirus 2] [isolate=SARS-CoV-2/human/USA/MA-QDX-2980/2021]	SKMSDVKCTSVVLLSVLQQLRVESSSKLWAQCVQLHNDILLAKDTTEAFERMVSLLSVLLSMQGAVDINKLCEEMLDNRATLQ
QOT58274.1:3860-3942 (28)	nsp7 [polyprotein=ORF1ab polyprotein] [organism=Severe acute respiratory syndrome coronavirus 2] [isolate=SARS-CoV-2/human/AUS/VIC14381/2020]	SKMSDVKCTSVVLFSVLQQLRVESSSKLWAQCVQLHNDILLAKDTTEAFEKMVSLLSVLLSMQGAVDINKLCEEMLDNRATLQ
QJR91615.1:3860-3942 (26)	nsp7 [polyprotein=ORF1ab polyprotein] [organism=Severe acute respiratory syndrome coronavirus 2] [isolate=SARS-CoV-2/human/AUS/VIC665/2020]	SKMSDVKCTSVVLLSVLQQLRVESSSKLWAQCVQLHNXILLAKDTTEAFEKMVSLLSVLLSMQGAVDINKLCEEMLDNRATLQ
UFR96841.1:3860-3942 (26)	nsp7 [polyprotein=ORF1ab polyprotein] [organism=Severe acute respiratory syndrome coronavirus 2] [isolate=SARS-CoV-2/human/USA/CO-CDC-MMB11444566/2021]	SKMSDVKCTSVVLLSVLQQLRVESSSKLWAQCVQVHNDILLAKDTTEAFEKMVSLLSVLLSMQGAVDINKLCEEMLDNRATLQ
QTX01024.1:3857-3939 (26)	nsp7 [polyprotein=ORF1ab polyprotein] [organism=Severe acute respiratory syndrome coronavirus 2] [isolate=SARS-CoV-2/human/USA/NY-CDC-2-3979473/2021]	SKMSDVKCTSVVLLSVLQQLRVESSSKLWAQCVQLHNDTLLAKDTTEAFEKMVSLLSVLLSMRGAVDINKLCEEMLDNRATLQ
QRG04150.1:3860-3942 (26)	nsp7 [polyprotein=ORF1ab polyprotein] [organism=Severe acute respiratory syndrome coronavirus 2] [isolate=SARS-CoV-2/human/USA/CA-CZB-14899/2020]	SKMSDVKCTSVVLLSVLQQLRVESSSKLWAQCVQLHNDILLAKDTTEAFEKMVSLLSVLLSMQGAVDINKXCEEMLDNRATLQ
QSF07363.1:3860-3942 (26)	nsp7 [polyprotein=ORF1ab polyprotein] [organism=Severe acute respiratory syndrome coronavirus 2] [isolate=SARS-CoV-2/human/USA/CA-CDC-STM-000007472/2021]	SKMSDVKCTSVVLLSVLQQLRVESSSKLWAQCVQLHNDILLAKDTTEVFEKMVSLLSVLLSMQGAVDINKLCEEMLDNRATLQ
QTW48681.1:3857-3939 (24)	nsp7 [polyprotein=ORF1ab polyprotein] [organism=Severe acute respiratory syndrome coronavirus 2] [isolate=SARS-CoV-2/human/USA/NY-CDC-QDX23396291/2021]	SKMSDVKCTSVVLLSVLQKLRVESSSKLWAQCVQLHNDILLAKDTTEAFEKMVSLLSVLLSMQGAVDINKLCEEMLDNRATLQ
QTK02453.1:3860-3942 (24)	nsp7 [polyprotein=ORF1ab polyprotein] [organism=Severe acute respiratory syndrome coronavirus 2] [isolate=SARS-CoV-2/human/USA/NY-CDC-ASC210003341/2021]	SKMSDVKCTSVVLLSVLQQLRVESSSKLWAQCVQLHNDILLAKDATEAFEKMVSLLSVLLSMQGAVDINKLCEEMLDNRATLQ
QTF83385.1:3860-3942 (24)	nsp7 [polyprotein=ORF1ab polyprotein] [organism=Severe acute respiratory syndrome coronavirus 2] [isolate=SARS-CoV-2/human/USA/NM-CDC-QDX22786655/2021]	SKMSDVKCTSVVLLSVLQQLRVESSSKLWAQCIQLHNDILLAKDTTEAFEKMVSLLSVLLSMQGAVDINKFCEEMLDNRATLQ
QMU94390.1:3860-3942 (24)	nsp7 [polyprotein=ORF1ab polyprotein] [organism=Severe acute respiratory syndrome coronavirus 2] [isolate=SARS-CoV-2/human/USA/WI-UW-977/2020]	SKMSDVKCTSVVLLSVLQQLRVESSSKLWAQCVQLHNDILLAKDTTEAFEKMVSLLSVLLSMQGAVDINKLCEEMLXNRATLQ
BDE28582.1:3860-3942 (23)	nsp7 [polyprotein=ORF1a polyprotein] [organism=Severe acute respiratory syndrome coronavirus 2] [isolate=hCoV-19/Japan/SZ-NIG-213514/2021]	SKMSDVKCTSVVLLSVLQQLRVESSSKLWAQCVQLHNDILLAKDTTEAFEKMVSLLSVLLSMQGAVDISKLCEEMLDNRATLQ
QSF13170.1:3860-3942 (22)	nsp7 [polyprotein=ORF1ab polyprotein] [organism=Severe acute respiratory syndrome coronavirus 2] [isolate=SARS-CoV-2/human/ISR/hCov-19-Israel-CVL-n-12003/2020]	SKMSDVKCTSVVLLSVLQQLRVESSSKLWAQCVQLHNDILLAKDTTEAFEKMVSLLSVLLSMQGAVDINKLSEEMLDNRATLQ
UIX79916.1:3853-3935 (22)	nsp7 [polyprotein=ORF1ab polyprotein] [organism=Severe acute respiratory syndrome coronavirus 2] [isolate=SARS-CoV-2/human/USA/NC-CDC-MMB12336625/2021]	SKMSDVKCTSVVLLSVLQQLRVESSSKLWAQCVQLHNDILLAKDTTEAFEKMVSXXXXXXXXXXXXXXNKLCEEMLDNRATLQ
UFY78107.1:3860-3942 (22)	nsp7 [polyprotein=ORF1ab polyprotein] [organism=Severe acute respiratory syndrome coronavirus 2] [isolate=SARS-CoV-2/human/USA/OH-CDC-ASC210482277/2021]	SKMSDVKCTSVVLLSVLQQLRVESSSKLWAQCVQLHNDILLAKDTTEAFEQMVSLLSVLLSMQGAVDINKLCEEMLDNRATLQ
QPF53148.1:3860-3942 (22)	nsp7 [polyprotein=ORF1ab polyprotein] [organism=Severe acute respiratory syndrome coronavirus 2] [isolate=SARS-CoV-2/human/USA/CA-CZB-10909/2020]	SKMSDVKCTSVVLLSVLQQLRVESSSKLWAQCVQLHNDILLAKDTTEAFEKMVSLLSVLLSMQGAVDINRLCEEMLDNRATLQ
QJR89203.1:3860-3942 (22)	nsp7 [polyprotein=ORF1ab polyprotein] [organism=Severe acute respiratory syndrome coronavirus 2] [isolate=SARS-CoV-2/human/AUS/VIC375/2020]	SKMSDVKCTSVVLLSVLQQLRVESSSKLWAQCVQLHNDILLAKDTTEAFEKMVSLLSVLLSMQGAVXINKLCEEMLDNRATLQ
QSF01735.1:3860-3942 (22)	nsp7 [polyprotein=ORF1ab polyprotein] [organism=Severe acute respiratory syndrome coronavirus 2] [isolate=SARS-CoV-2/human/USA/OH-CDC-STM-000009252/2021]	SKMSDVKCTSVVLLSVLQQLRVESSSKSWAQCVQLHNDILLAKDTTEAFEKMVSLLSVLLSMQGAVDINKLCEEMLDNRATLQ
QTE05277.1:3860-3942 (22)	nsp7 [polyprotein=ORF1ab polyprotein] [organism=Severe acute respiratory syndrome coronavirus 2] [isolate=SARS-CoV-2/human/USA/UT-UPHL-2103658756/2021]	SKMSDVKCTSAVLLSVLQQLRVESSSKLWAQCVQLHNDILLAKDTTEAFEKMVSLLSVLLSMQGAVDINKLCEEMLDNRATLQ
QSE16766.1:3860-3942 (20)	nsp7 [polyprotein=ORF1ab polyprotein] [organism=Severe acute respiratory syndrome coronavirus 2] [isolate=SARS-CoV-2/human/USA/RI-CDC-QDX21491240/2021]	SKMSDVKCTSVVLLSVLQQLRAESSSKLWAQCVQLHNDILLAKDTTEAFEKMVSLLSVLLSMQGAVDINKLCEEMLDNRATLQ
QUD10460.1:3860-3942 (20)	nsp7 [polyprotein=ORF1ab polyprotein] [organism=Severe acute respiratory syndrome coronavirus 2] [isolate=SARS-CoV-2/human/USA/OR-CDC-LC0039572/2021]	SKMSDVKCTSVVLLSVLQQLRVESASKLWAQCVQLHNDILLAKDTTEAFEKMVSLLSVLLSMQGAVDINKLCEEMLDNRATLQ
UAV93352.1:3860-3942 (20)	nsp7 [polyprotein=ORF1ab polyprotein] [organism=Severe acute respiratory syndrome coronavirus 2] [isolate=SARS-CoV-2/human/USA/UT-UPHL-210911306747/2021]	SKMSDVKCTSVVLLSVLQQLRVESSSKLWAQCVQLHNEILLAKDTTEAFEKMVSLLSVLLSMQGAVDINKLCEEMLDNRATLQ
QUC99360.1:3857-3939 (20)	nsp7 [polyprotein=ORF1ab polyprotein] [organism=Severe acute respiratory syndrome coronavirus 2] [isolate=SARS-CoV-2/human/USA/PA-CDC-LC0038547/2021]	SKMSDVKCTSVVLLSVLQQLRVESSSKLWAQCVQLHNDILLAKDTTEAFEKMVSLLSVLLSMQGAVDITKLCEEMLDNRATLQ
QSF04555.1:3860-3942 (18)	nsp7 [polyprotein=ORF1ab polyprotein] [organism=Severe acute respiratory syndrome coronavirus 2] [isolate=SARS-CoV-2/human/USA/FL-CDC-STM-000010554/2021]	SKMSDVKCTSVVLLSVLQQLRVESSSKLWAQCVQLHNDILLAKDTTEAFEKMVSLLSVLLSMQGAVDINKLCEDMLDNRATLQ
QTB02164.1:3860-3942 (18)	nsp7 [polyprotein=ORF1ab polyprotein] [organism=Severe acute respiratory syndrome coronavirus 2] [isolate=SARS-CoV-2/human/USA/MA-CDC-QDX22523104/2021]	SKMSDVKCTSVVLLSVLQQLRVEASSKLWAQCVQLHNDILLAKDTTEAFEKMVSLLSVLLSMQGAVDINKLCEEMLDNRATLQ
QTJ10508.1:3857-3939 (18)	nsp7 [polyprotein=ORF1ab polyprotein] [organism=Severe acute respiratory syndrome coronavirus 2] [isolate=SARS-CoV-2/human/USA/TX-CDC-QDX22759493/2021]	SKMSYVKCTSVVLLSVLQQLRVESSSKLWAQCVQLHNDILLAKDTTEAFEKMVSLLSVLLSMQGAVDINKLCEEMLDNRATLQ
UGB70098.1:3860-3942 (18)	nsp7 [polyprotein=ORF1ab polyprotein] [organism=Severe acute respiratory syndrome coronavirus 2] [isolate=SARS-CoV-2/human/USA/MI-CDC-ASC210426063/2021]	SKMSDVKCTSVVLLSVLQQLRVESSSKLWAQCVQLHNDILLAKDTTEAFEKMVSLLSVLLSMQGAVDINKICEEMLDNRATLQ
QUQ01357.1:3857-3939 (18)	nsp7 [polyprotein=ORF1ab polyprotein] [organism=Severe acute respiratory syndrome coronavirus 2] [isolate=SARS-CoV-2/human/USA/TN-CDC-2-4243276/2021]	SKMSDVKCTSVVLLSVLQQLRVESSSKLWAQCVQLHNDILLAKDTTEAFEKMVSLLFVLLSMQGAVDINKLCEEMLDNRATLQ
UFU31791.1:3860-3942 (18)	nsp7 [polyprotein=ORF1ab polyprotein] [organism=Severe acute respiratory syndrome coronavirus 2] [isolate=SARS-CoV-2/human/USA/CO-CDC-MMB11406573/2021]	SKMSDVKCTSVVLLSVLQQLRVXXXXXXXXXXXXXXXDILLAKDTTEAFEKMVSLLSVLLSMQGAVDINKLCEEMLDSRATLQ
QQV31621.1:3860-3942 (18)	nsp7 [polyprotein=ORF1ab polyprotein] [organism=Severe acute respiratory syndrome coronavirus 2] [isolate=SARS-CoV-2/human/USA/MA-QDX-2985/2021]	XXXXXXXCTSVVLLSVLQQLRVESSSKLWAQCVQLHNDILLAKDTTEAFEKMVSLLSVLLSMQGAVDINKLCEEMLDNRATLQ
UHG21787.1:3860-3942 (18)	nsp7 [polyprotein=ORF1ab polyprotein] [organism=Severe acute respiratory syndrome coronavirus 2] [isolate=SARS-CoV-2/human/USA/MA-CDC-STM-8DSSW3Q2B/2021]	SKMSDVKCTSVVLLSVLQQLRVESSSKLWAQCVQLHNDILLAKDNTEAFEKMVSLLSVLLSMQGAVDINKLCEEMLDNRATLQ
BDC79034.1:3857-3939 (17)	nsp7 [polyprotein=ORF1a polyprotein] [organism=Severe acute respiratory syndrome coronavirus 2] [isolate=hCoV-19/Japan/SZ-NIG-Y21447/2021]	SKMSDVKCTSVVLLAVLQQLRVESSSKLWAQCVQLHNDILLAKDTTEAFEKMVSLLSVLLSMQGAVDINKLCEEMLDNRATLQ
QTB10238.1:3860-3942 (16)	nsp7 [polyprotein=ORF1ab polyprotein] [organism=Severe acute respiratory syndrome coronavirus 2] [isolate=SARS-CoV-2/human/USA/WY-CDC-2-3971687/2021]	SKMSDVKCTSVVLLSVLQQLRVESSSKLWAQCVQLHNDILLAKDTTEAFKKMVSLLSVLLSMQGAVDINKLCEEMLDNRATLQ
UMQ83729.1:3860-3942 (16)	nsp7 [polyprotein=ORF1ab polyprotein] [organism=Severe acute respiratory syndrome coronavirus 2] [isolate=SARS-CoV-2/human/USA/TN-VUMC-O-0145/2021]	SKMSDVKCTSVVLLSVLQQLRVESSSXXXXXXXQLHNDILLAKDTTEAFEKMVSLLSVLLSMQGAVDINKLCEEMLDNRATLQ
UFR93540.1:3860-3942 (16)	nsp7 [polyprotein=ORF1ab polyprotein] [organism=Severe acute respiratory syndrome coronavirus 2] [isolate=SARS-CoV-2/human/USA/CO-CDC-MMB11460742/2021]	SKMSDVKCTSVVLLSVLQQLRVESSSXXXXXXXXXXXDILLAKDTTEAFEKMVSLLSVLLSMQGAVDINKLCEEMLDNRATLQ
UGL00328.1:3860-3942 (16)	nsp7 [polyprotein=ORF1ab polyprotein] [organism=Severe acute respiratory syndrome coronavirus 2] [isolate=SARS-CoV-2/human/USA/CA-CDC-FG-180944/2021]	SKMSDVKCTSVVLLSVLQQLRVESSSKLWAQCVLLHNDILLAKDTTEAFEKMVSLLSVLLSMQGAVDINKLCEEMLDNRATLQ
QKU31539.1:3860-3942 (16)	nsp7 [polyprotein=ORF1ab polyprotein] [organism=Severe acute respiratory syndrome coronavirus 2] [isolate=SARS-CoV-2/human/USA/CA-CZB-1414/2020]	SKMSDVKCTSVVLLSVLQQLRVESSSKLWAQCVQLHNDILLAKDTTEAFEKMVSLLSVLLSMQGAVDINKLCEEXLDNRATLQ
QJX45354.1:3860-3942 (14)	nsp7 [polyprotein=ORF1ab polyprotein] [organism=Severe acute respiratory syndrome coronavirus 2] [isolate=SARS-CoV-2/human/TUN/COV1663/2020]	SKMSDVKCTSVVLLSVLQQLRVESSSKLWAHCVQLHNDILLAKDTTEAFEKMVSLLSVLLSMQGAVDINKLCEEMLDNRATLQ
QVH06038.1:3857-3939 (14)	nsp7 [polyprotein=ORF1ab polyprotein] [organism=Severe acute respiratory syndrome coronavirus 2] [isolate=SARS-CoV-2/human/USA/MN-CDC-IBX332648401368/2021]	SKMSDVKCTSVVLLSVLQQLRVESSSKLWAQCVQLHNDILLAKDTSEAFEKMVSLLSVLLSMQGAVDINKLCEEMLDNRATLQ
QUX42094.1:3857-3939 (14)	nsp7 [polyprotein=ORF1ab polyprotein] [organism=Severe acute respiratory syndrome coronavirus 2] [isolate=SARS-CoV-2/human/USA/FL-CDC-QDX24125528/2021]	SKMSDVKCTSVVLLSVLQQLRVESSSKLWAQCVQLHNDILLAKDTTEAFEKMVSLLSVLLSMQGAADINKLCEEMLDNRATLQ
QPN06178.1:3860-3942 (14)	nsp7 [polyprotein=ORF1ab polyprotein] [organism=Severe acute respiratory syndrome coronavirus 2] [isolate=SARS-CoV-2/human/USA/WI-UW-2220/2020]	SKMSDVKCTSVVLLSVLQQLRVESSSKLWAQCVQLHNDILLAKDTTEAFEKMVSLLSVLLSMQGAVDIXKLCEEMLDNRATLQ
QSE00230.1:3860-3942 (14)	nsp7 [polyprotein=ORF1ab polyprotein] [organism=Severe acute respiratory syndrome coronavirus 2] [isolate=SARS-CoV-2/human/USA/MO-CDC-QDX21568828/2021]	SKMSDVKCTSVVLLSVLQQLRVESSSKLWAQCVQLHNDILLAKDTTEAFEKMASLLSVLLSMQGAVDINKLCEEMLDNRATLQ
QTQ63658.1:3860-3942 (14)	nsp7 [polyprotein=ORF1ab polyprotein] [organism=Severe acute respiratory syndrome coronavirus 2] [isolate=SARS-CoV-2/human/USA/IL-CDC-2-4122128/2021]	SKMSDVKCTSVVLLSVLQQLRVESSSKLWAQCVQLHNDILLAKDTTEAFEKMVSLLSVLLSMQGAVDINKLCEEMLDXRATLQ
UJH17173.1:3856-3938 (14)	nsp7 [polyprotein=ORF1ab polyprotein] [organism=Severe acute respiratory syndrome coronavirus 2] [isolate=SARS-CoV-2/human/USA/GA-GPHL-139/2022]	SKMSDVKCTSVVLLSVLQQLRVESSSKLWAQCVQLHNDILVAKDTTEAFEKMVSLLSVLLSMQGAVDINKLCEEMLDNRATLQ
QVD86921.1:3857-3939 (14)	nsp7 [polyprotein=ORF1ab polyprotein] [organism=Severe acute respiratory syndrome coronavirus 2] [isolate=SARS-CoV-2/human/USA/MN-CDC-STM-000061647/2021]	SKMSDVKCTSVVLLSVLQQLRVESSSKLWAQCVQLHNDILLAKDTTESFEKMVSLLSVLLSMQGAVDINKLCEEMLDNRATLQ
QNO88965.1:3860-3942 (14)	nsp7 [polyprotein=ORF1ab polyprotein] [organism=Severe acute respiratory syndrome coronavirus 2] [isolate=SARS-CoV-2/human/AUS/VIC6260/2020]	SKMSDVKCTSVFLLSVLQQLRVESSSKLWAQCVQLHNDILLAKDTTEAFEKMVSLLSVLLSMQGAVDINKLCEEMLDNRATLQ
QQO76098.1:3860-3942 (14)	nsp7 [polyprotein=ORF1ab polyprotein] [organism=Severe acute respiratory syndrome coronavirus 2] [isolate=SARS-CoV-2/human/EGY/EGY_CCHE57357_A_44/2020]	SKMSDVKCTSVVLLSVLQQLRVESSSKLWAQCVQLHNDILLAKDTTEAFEKMVSLLSVLLAMQGAVDINKLCEEMLDNRATLQ
QUA70253.1:3860-3942 (14)	nsp7 [polyprotein=ORF1ab polyprotein] [organism=Severe acute respiratory syndrome coronavirus 2] [isolate=SARS-CoV-2/human/USA/KS-CDC-2-4176950/2021]	SKMSDVKCTSVVLLSVLQQLRVESSSKLWAQCVQLYNDILLAKDTTEAFEKMVSLLSVLLSMQGAVDINKLCEEMLDNRATLQ
UHB43479.1:3860-3942 (14)	nsp7 [polyprotein=ORF1ab polyprotein] [organism=Severe acute respiratory syndrome coronavirus 2] [isolate=SARS-CoV-2/human/USA/SD-INBRE-0043/2021]	SKMSDVKCTSVVLLSVLQQLRVESSSKLWAQCVQLHNDILLAKDTTEAFEKMVSLLSVLLSMQGAVDINKLCEEMXDNRATLQ
UHZ92793.1:3860-3942 (14)	nsp7 [polyprotein=ORF1ab polyprotein] [organism=Severe acute respiratory syndrome coronavirus 2] [isolate=SARS-CoV-2/human/USA/CO-CDC-MMB11928811/2021]	SKMSDVKCTSVVLLSVLQQLRVESSSKLWAQCVQLHNDILLAKDTTEAFEKMVSXXXXXXXXXXAVDINKLCEEMLDNRATLQ
QRW95256.1:3860-3942 (14)	nsp7 [polyprotein=ORF1ab polyprotein] [organism=Severe acute respiratory syndrome coronavirus 2] [isolate=SARS-CoV-2/human/USA/PA-CDC-LC0003477/2021]	SKMSDVKCTSVVLLSVLQQLRVESSSKLWAQCVQLHNDILLAKDTTEAFEKMVSLLSVLLCMQGAVDINKLCEEMLDNRATLQ
QLC94770.1:3860-3942 (14)	nsp7 [polyprotein=ORF1ab polyprotein] [organism=Severe acute respiratory syndrome coronavirus 2] [isolate=SARS-CoV-2/human/USA/WI-UW-338/2020]	SKMSDVKCTSVVLLSVLQQLRVESSAKLWAQCVQLHNDILLAKDTTEAFEKMVSLLSVLLSMQGAVDINKLCEEMLDNRATLQ
QRA18257.1:3860-3942 (12)	nsp7 [polyprotein=ORF1ab polyprotein] [organism=Severe acute respiratory syndrome coronavirus 2] [isolate=SARS-CoV-2/human/EGY/CUNCI-HGC11I046/2021]	SKMSDVKCTSVVLLSVLQQLRVESSSKLWAQCVQLHNDILLAKDTTEAFEKMVSLLSVLLSMQGAVDINKLCEEMLDNRAXLQ
QTP24151.1:3860-3942 (12)	nsp7 [polyprotein=ORF1ab polyprotein] [organism=Severe acute respiratory syndrome coronavirus 2] [isolate=SARS-CoV-2/human/USA/UMW22026179/2020]	SKMSDVKCTSVVLLSVLQQLRVESSSKLWAQCVQLHNDIJLAKDTTEAFEKMVSLLSVLLSMQGAVDINKLCEEMLDNRATLQ
QVE30945.1:3857-3939 (12)	nsp7 [polyprotein=ORF1ab polyprotein] [organism=Severe acute respiratory syndrome coronavirus 2] [isolate=SARS-CoV-2/human/USA/MN-CDC-IBX112685613702/2021]	SKMSAVKCTSVVLLSVLQQLRVESSSKLWAQCVQLHNDILLAKDTTEAFEKMVSLLSVLLSMQGAVDINKLCEEMLDNRATLQ
UPB92075.1:3860-3942 (12)	nsp7 [polyprotein=ORF1ab polyprotein] [organism=Severe acute respiratory syndrome coronavirus 2] [isolate=SARS-CoV-2/human/FRA/IHUCOVID-002061/2020]	SKISDVKCTSVVLLSVLQQLRVESSSKLWAQCVQLHNDILLAKDTTEAFEKMVSLLSFLLSMQGAVDINKLCEEMLDNRATLQ
UIK32520.1:3860-3942 (12)	nsp7 [polyprotein=ORF1ab polyprotein] [organism=Severe acute respiratory syndrome coronavirus 2] [isolate=SARS-CoV-2/human/USA/VA-CDC-MMB12179585/2021]	SKMSDVKCTSVVLLSVLQQLRVESSSKLWAQCVQLHNDILLAKDTTEAFEKMVSLLSXLLSMQGAVDINKLCEEMLDNRATLQ
UMQ80059.1:3860-3942 (12)	nsp7 [polyprotein=ORF1ab polyprotein] [organism=Severe acute respiratory syndrome coronavirus 2] [isolate=SARS-CoV-2/human/USA/TN-VUMC-O-0014/2021]	SKMSDVKCTSVVLLSVLQQLRVESSSXXXXXXVQLHNDILLAKDTTEAFEKMVSLLSVLLSMQGAVDINKLCEEMXXXXXTLQ
UJY84823.1:3857-3939 (12)	nsp7 [polyprotein=ORF1ab polyprotein] [organism=Severe acute respiratory syndrome coronavirus 2] [isolate=SARS-CoV-2/human/USA/UT-UPHL-220121162432/2022]	SKMLDVKCTSVVLLSVLQQLRVESSSKLWAQCVQLHNDILLAKDTTEAFEKMVSLLSVLLSMQGAVDINKLCEEMLDNRATLQ
QSX88214.1:3860-3942 (12)	nsp7 [polyprotein=ORF1ab polyprotein] [organism=Severe acute respiratory syndrome coronavirus 2] [isolate=SARS-CoV-2/human/USA/NY-CDC-QDX22487646/2021]	SNMSDVKCTSVVLLSVLQQLRVESSSKLWAQCVQLHNDILLAKDTTEAFEKMVSLLSVLLSMQGAVDINKLCEEMLDNRATLQ
QUA56252.1:3857-3939 (12)	nsp7 [polyprotein=ORF1ab polyprotein] [organism=Severe acute respiratory syndrome coronavirus 2] [isolate=SARS-CoV-2/human/USA/MD-MDH-1790/2021]	SKMSDVKCTSVVLLSVLQQLRVESSSKLWAQCVQLHNDILLAKDTTEAFEKMVSLLSVLLSMQGAVGINKLCEEMLDNRATLQ
QTS10245.1:3860-3942 (12)	nsp7 [polyprotein=ORF1ab polyprotein] [organism=Severe acute respiratory syndrome coronavirus 2] [isolate=SARS-CoV-2/human/USA/NM-CDC-LC0031947/2021]	SKMSDVKCTSVVLLSVLQQLRVESSSKLWAQCVQLHNDILLAKDTTEAFEKLVSLLSVLLSMQGAVDINKLCEEMLDNRATLQ
QWK68958.1:3857-3939 (12)	nsp7 [polyprotein=ORF1ab polyprotein] [organism=Severe acute respiratory syndrome coronavirus 2] [isolate=SARS-CoV-2/human/USA/CO-CDC-MMB08822583/2021]	SKMSDVKCTSVVLLSVLQQLRVESSSKLWAQCVQLHNDILLSKDTTEAFEKMVSLLSVLLSMQGAVDINKLCEEMLDNRATLQ
UFV85596.1:3860-3942 (12)	nsp7 [polyprotein=ORF1ab polyprotein] [organism=Severe acute respiratory syndrome coronavirus 2] [isolate=SARS-CoV-2/human/USA/NV-CDC-LC0392043/2021]	SKMSDVKCTSVVLLSVLQQLRVESSSKLWAQCVQLHNDILLAKDTTEAFEKMVSLLSVLLSMKGAVDINKLCEEMLDNRATLQ
UFR92694.1:3860-3942 (10)	nsp7 [polyprotein=ORF1ab polyprotein] [organism=Severe acute respiratory syndrome coronavirus 2] [isolate=SARS-CoV-2/human/USA/CO-CDC-MMB11455379/2021]	SKMSDVKCTSVVLLSVLQQLRVXXXXXXXXXXXXXHNDILLAKDTTEAFEKMVSLLSVLLSMQGAVDINKLCEEMLDSRATLQ
QPF54312.1:3860-3942 (10)	nsp7 [polyprotein=ORF1ab polyprotein] [organism=Severe acute respiratory syndrome coronavirus 2] [isolate=SARS-CoV-2/human/USA/CA-CZB-11132/2020]	SKMSDVKCTSVVLLSVLQQLRVESSSKLWAQCVQLHNDILLAKDTTEAFEKMVSLXSVLLSMQGAVDINKLCEEMLDNRATLQ
QQG31684.1:3860-3942 (10)	nsp7 [polyprotein=ORF1ab polyprotein] [organism=Severe acute respiratory syndrome coronavirus 2] [isolate=SARS-CoV-2/human/USA/VA-DCLS-2300/2020]	SKMSDVKCTSVVLLSVLQQLRVESLSKLWAQCVQLHNDILLAKDTTEAFEKMVSLLSVLLSMQGAVDINKLCEEMLDNRAILQ
QWB87571.1:3857-3939 (10)	nsp7 [polyprotein=ORF1ab polyprotein] [organism=Severe acute respiratory syndrome coronavirus 2] [isolate=SARS-CoV-2/human/USA/MN-MDH-7630/2021]	SKMSDVKCTSVVLLSVLQQLRVESSSKLWAQCVQLHNDXLLAKDTTEAFEKMVSLLSVLLSMQGAVDINKLCEEMLDNRATLQ
QUC71881.1:3857-3939 (10)	nsp7 [polyprotein=ORF1ab polyprotein] [organism=Severe acute respiratory syndrome coronavirus 2] [isolate=SARS-CoV-2/human/USA/IL-CDC-LC0035766/2021]	SKMSDVKCTSVVLLSVLQQLRVESSSKLWAQCVQLHNDILLAKDTTEAFEKMVSLLSVLLSKQGAVDINKLCEEMLDNRATLQ
QUC89448.1:3857-3939 (10)	nsp7 [polyprotein=ORF1ab polyprotein] [organism=Severe acute respiratory syndrome coronavirus 2] [isolate=SARS-CoV-2/human/USA/VA-CDC-LC0037159/2021]	SKMSDVKCTSVVLLSVLQQLRVESSSKLWAQCVQLHNDILLAKDTTEAFEKMVSLLSVLLSMQGAVDIKKLCEEMLDNRATLQ
QLC92358.1:3860-3942 (10)	nsp7 [polyprotein=ORF1ab polyprotein] [organism=Severe acute respiratory syndrome coronavirus 2] [isolate=SARS-CoV-2/human/USA/WI-UW-250/2020]	SKMSDVKCTSVVLLSVLQQLRVESSSKLWAQCVQLHNDILLAKDTTEAFEKMVSLLSVLLSMXGAVDINKLCEEMLDNRATLQ
QVU71380.1:3857-3939 (10)	nsp7 [polyprotein=ORF1ab polyprotein] [organism=Severe acute respiratory syndrome coronavirus 2] [isolate=SARS-CoV-2/human/USA/CA-CDC-ASC210059630/2021]	SKMSDVKCTSVVLLSVLQQLRVESSSKLWAQCVQLHNDILLAKDTTEAFEKMVSLLSVLLSMQGAVDINKLCEEMQDNRATLQ
UGP31187.1:3860-3942 (10)	nsp7 [polyprotein=ORF1ab polyprotein] [organism=Severe acute respiratory syndrome coronavirus 2] [isolate=SARS-CoV-2/human/USA/CA-CDPH-3000273942/2021]	SKMSDVKCTSVVLLSVLQQLRVESSSKLWAQCVQLHNDILLAKDTTVAFEKMVSLLSVLLSMQGAVDINKLCEEMLDNRATLQ
QPF54636.1:3860-3942 (10)	nsp7 [polyprotein=ORF1ab polyprotein] [organism=Severe acute respiratory syndrome coronavirus 2] [isolate=SARS-CoV-2/human/USA/CA-CZB-11549/2020]	SKMSDVKCTSVVLLSVLQQLRVESSSKLWALCVQLHNDILLAKDTTEAFEKMVSLLSVLLSMQGAVDINKLCEEMLDNRATLQ
QRK18101.1:3860-3942 (10)	nsp7 [polyprotein=ORF1ab polyprotein] [organism=Severe acute respiratory syndrome coronavirus 2] [isolate=SARS-CoV-2/human/USA/FL-CDC-STM-000005978/2021]	SKMSDVKCTSVVLLSVLQQLRVESSSKLWAQCVQLHNDILLAKDTTEAFEKMVSLLSVLLSMQGAVDINKLCKEMLDNRATLQ
UGY57206.1:3860-3942 (10)	nsp7 [polyprotein=ORF1ab polyprotein] [organism=Severe acute respiratory syndrome coronavirus 2] [isolate=SARS-CoV-2/human/USA/NC-CORVASEQ-DH-260M1191000004096/2021]	SKMSDVKCTSVVLLSVLQQLRVESSSKLWAQCVQLHNDILLAKDTTEAFEKMISLLSVLLSMQGAVDINKLCEEMLDNRATLQ
UGR95535.1:3860-3942 (10)	nsp7 [polyprotein=ORF1ab polyprotein] [organism=Severe acute respiratory syndrome coronavirus 2] [isolate=SARS-CoV-2/human/USA/NV-CDC-FG-185437/2021]	SKMSDVKCTSVVLLSVLQQLRVESSSKLWAQCVQLHNDILLAKDTTEAFEKMVSLLSVLXSMQGAVDINKLCEEMLDNRATLQ
UHH91294.1:3860-3942 (10)	nsp7 [polyprotein=ORF1ab polyprotein] [organism=Severe acute respiratory syndrome coronavirus 2] [isolate=SARS-CoV-2/human/USA/WV-CDC-MMB11710684/2021]	SKMSDVKCTSVVLLSILQQLRVESSSKLWAQCVQLHNDILLAKDTTEAFEKMVSLLSVLLSMQGAVDINKLCEEMLDNRATLQ
QVG37263.1:3857-3939 (10)	nsp7 [polyprotein=ORF1ab polyprotein] [organism=Severe acute respiratory syndrome coronavirus 2] [isolate=SARS-CoV-2/human/USA/MO-CDC-ASC210075706/2021]	SKMSDVKCTSVVLLSVLQQLKVESSSKLWAQCVQLHNDILLAKDTTEAFEKMVSLLSVLLSMQGAVDINKLCEEMLDNRATLQ
QQP30134.1:3860-3942 (10)	nsp7 [polyprotein=ORF1ab polyprotein] [organism=Severe acute respiratory syndrome coronavirus 2] [isolate=SARS-CoV-2/human/USA/GA-CDC-3897159-001/2020]	SKMSDVKCTSVVLLSVLQQLRVESSSKLWAQCVQLHNDILLAKDTTEAFEKMVSLLSVLLSMQGAVDINXLCEEMLDNRATLQ
UGT10042.1:3860-3942 (10)	nsp7 [polyprotein=ORF1ab polyprotein] [organism=Severe acute respiratory syndrome coronavirus 2] [isolate=SARS-CoV-2/human/USA/PA-CDC-MMB11598498/2021]	SKMSDVKCTSVVLLSVLQQLRVESSSKLWAQCVQLHNDILLAKDTTEAFEKMVSLLSVLLSMQGAVDINKLCEEMLDNRSTLQ
QRV68624.1:3860-3942 (10)	nsp7 [polyprotein=ORF1ab polyprotein] [organism=Severe acute respiratory syndrome coronavirus 2] [isolate=SARS-CoV-2/human/USA/FL-BPHL-0259/2021]	SKMSDVKCTSVVLLSVLQQLRVESSSKLWAQCVQLHNDILLAKDTTEAFEKMVSLLSVLLSMQGAVDMNKLCEEMLDNRATLQ
QSQ89381.1:3860-3942 (10)	nsp7 [polyprotein=ORF1ab polyprotein] [organism=Severe acute respiratory syndrome coronavirus 2] [isolate=SARS-CoV-2/human/USA/CO-CDPHE-2011221706/2020]	SKMSDVKCTSVVLLSVLQQLRVESSXKLWAQCVQLHNDILLAKDTTEAFEKMVSLLSVLLSMQGAVDINKLCEEMLDNRATLQ
QSY40414.1:3860-3942 (8)	nsp7 [polyprotein=ORF1ab polyprotein] [organism=Severe acute respiratory syndrome coronavirus 2] [isolate=SARS-CoV-2/human/USA/UT-UPHL-2103657791/2021]	SKMSDVKCTSXVLLSVLQQLRVESSSKLWAQCVQLHNDILLAKDTTEAFEKMVSLLSVLLSMQGAVDINKLCEEMLDNRATLQ
QUI06219.1:3857-3939 (8)	nsp7 [polyprotein=ORF1ab polyprotein] [organism=Severe acute respiratory syndrome coronavirus 2] [isolate=SARS-CoV-2/human/USA/NJ-CDC-LC0043103/2021]	SKMSDVKCTSVVLLSVLQQLRVESSSKLWAQCVQLHNDILLAKDTTEAFEKMVSLLSVLLSMQSAVDINKLCEEMLDNRATLQ
UGO41407.1:3860-3942 (8)	nsp7 [polyprotein=ORF1ab polyprotein] [organism=Severe acute respiratory syndrome coronavirus 2] [isolate=SARS-CoV-2/human/USA/NM-CDC-LC0405399/2021]	SKMSDVKCTSVVLLSVLQQLRVESSSNLWAQCVQLHNDILLAKDTTEAFEKMVSLLSVLLSMQGAVDINKLCEEMLDNRATLQ
QJS54752.1:3860-3942 (8)	nsp7 [polyprotein=ORF1ab polyprotein] [organism=Severe acute respiratory syndrome coronavirus 2] [isolate=SARS-CoV-2/human/USA/CA-CZB-1105/2020]	SKMSDVKCTSVVLLSVLQQLRVESSSKLWAQCVQLHNDILLAKDTTEAFEKMVSLLSVLLSMQGAVDINKLCEEMLDNGATLQ
UGR90112.1:3860-3942 (8)	nsp7 [polyprotein=ORF1ab polyprotein] [organism=Severe acute respiratory syndrome coronavirus 2] [isolate=SARS-CoV-2/human/USA/CA-CDC-FG-184994/2021]	SKMSDVKCTSVVLLSVLQQLRVKSSSKLWAQCVQLHNDILLAKDTTEAFEKMVSLLSVLLSMQGAVDINKLCEEMLDNRATLQ
UGC70824.1:3860-3942 (8)	nsp7 [polyprotein=ORF1ab polyprotein] [organism=Severe acute respiratory syndrome coronavirus 2] [isolate=SARS-CoV-2/human/USA/AL-CDC-ASC210456096/2021]	SKMSDVKCTSVVLLSVLQQLRVESSSKLWAQCVQLHNDILLAKDTTEAFEKMVSLLSVLLSMQGAVDINKLCEEMLDNRATXX
QVJ21754.1:3857-3939 (8)	nsp7 [polyprotein=ORF1ab polyprotein] [organism=Severe acute respiratory syndrome coronavirus 2] [isolate=SARS-CoV-2/human/USA/NC-CDC-ASC210055091/2021]	SKTSDVKCTSVVLLSVLQQLRVESSSKLWAQCVQLHNDILLAKDTTEAFEKMVSLLSVLLSMQGAVDINKLCEEMLDNRATLQ
QWF06998.1:3860-3942 (8)	nsp7 [polyprotein=ORF1ab polyprotein] [organism=Severe acute respiratory syndrome coronavirus 2] [isolate=SARS-CoV-2/human/USA/AL-CDC-ASC210065958/2021]	SKMSDVKCTSVVLLSVLQQLRVESSSKLWAQCVKLHNDILLAKDTTEAFEKMVSLLSVLLSMQGAVDINKLCEEMLDNRATLQ
QLC48062.1:3860-3942 (8)	nsp7 [polyprotein=ORF1ab polyprotein] [organism=Severe acute respiratory syndrome coronavirus 2] [isolate=SARS-CoV-2/human/USA/MD-MDH-0028/2020]	SKMSDVKCTSVVLLSVLQQLRVESSSKLWAQCVQLHNDILLAKDTTEAFEKMVALLSVLLSMQGAVDINKLCEEMLDNRATLQ
QVD51566.1:3857-3939 (8)	nsp7 [polyprotein=ORF1ab polyprotein] [organism=Severe acute respiratory syndrome coronavirus 2] [isolate=SARS-CoV-2/human/USA/NJ-CDC-ASC210024343/2021]	SKMSDVKCTSVVLLSVLQQLRVESSSKLWAQCVQLHNDILLAKDTTEAFEKMVSLLSVLLSMQGAVDIYKLCEEMLDNRATLQ
QXG83240.1:3860-3942 (8)	nsp7 [polyprotein=ORF1ab polyprotein] [organism=Severe acute respiratory syndrome coronavirus 2] [isolate=SARS-CoV-2/human/USA/WV090209/2021]	SKMSDVKCTSVVLLSVLQQLRVESSSKLWAQCVQLHNDILLAKDTTEAFEKMVSLLSVLLSMQGAVDINKLCEEMLDYRATLQ
QQG71684.1:3860-3942 (8)	nsp7 [polyprotein=ORF1ab polyprotein] [organism=Severe acute respiratory syndrome coronavirus 2] [isolate=SARS-CoV-2/human/USA/UT-UPHL-2012061461/2020]	SKMSDVKCTSVVILSVLQQLRVESSSKLWAQCVQLHNDILLAKDTTEAFEKMVSLLSVLLSMQGAVDINKLCEEMLDNRATLQ
QXE76184.1:3860-3942 (8)	nsp7 [polyprotein=ORF1ab polyprotein] [organism=Severe acute respiratory syndrome coronavirus 2] [isolate=SARS-CoV-2/human/USA/NV-NSPHL-343595/2021]	SKMSDVKCTSVVLLSVLQQLRVESSSKLWAQCVQLHNAILLAKDTTEAFEKMVSLLSVLLSMQGAVDINKLCEEMLDNRATLQ
QUQ01705.1:3857-3939 (8)	nsp7 [polyprotein=ORF1ab polyprotein] [organism=Severe acute respiratory syndrome coronavirus 2] [isolate=SARS-CoV-2/human/USA/CA-CDC-2-4242798/2021]	SXMSDVKCTSVVLLSVLQQLRVESSSKLWAQCVQLHNDILLAKDTTEAFEKMVSLLSVLLSMQGAVDINKLCEEMLDNRATLQ
UGK96933.1:3860-3942 (8)	nsp7 [polyprotein=ORF1ab polyprotein] [organism=Severe acute respiratory syndrome coronavirus 2] [isolate=SARS-CoV-2/human/USA/TX-CDC-FG-181550/2021]	SKMSDVKCTSVVLLSVLQQLRVESSSKLWAQCVQLHNDILLAKDTTAAFEKMVSLLSVLLSMQGAVDINKLCEEMLDNRATLQ
QTC14478.1:3851-3933 (8)	nsp7 [polyprotein=ORF1ab polyprotein] [organism=Severe acute respiratory syndrome coronavirus 2] [isolate=SARS-CoV-2/human/USA/FL-CDC-STM-000025802/2021]	SKMSDVKCTSVVLLSVLQQLRVESSSKLWAQCVQLHNDILLAKDTTEAFEKMVSLFSVLLSMQGAVDINKFCEEMLDNRATLQ
QUQ34022.1:3857-3939 (8)	nsp7 [polyprotein=ORF1ab polyprotein] [organism=Severe acute respiratory syndrome coronavirus 2] [isolate=SARS-CoV-2/human/USA/MN-CDC-ASC210052091/2021]	SKMSDVKCTSIVLLSVLQQLRVESSSKLWAQCVQLHNDILLAKDTTEAFEKMVSLLSVLLSMQGAVDINKLCEEMLDNRATLQ
UHA38056.1:3860-3942 (6)	nsp7 [polyprotein=ORF1ab polyprotein] [organism=Severe acute respiratory syndrome coronavirus 2] [isolate=SARS-CoV-2/human/USA/MD-CDC-ASC210711372/2021]	SKMSDVKCTSVVLLSVLQQLRVESSSILWAQCVQLHNDILLAKDTTEAFEKMVSLLSVLLSMQGAVDINKLCEEMLDNRATLQ
QVG53513.1:3857-3937 (6)	nsp7 [polyprotein=ORF1ab polyprotein] [organism=Severe acute respiratory syndrome coronavirus 2] [isolate=SARS-CoV-2/human/USA/SC-CDC-ASC210035968/2021]	SKMSDVKCTSVVLLSVLQQLRVESSSKLWAQCVQLHNDILLAKDTTEAFEKMVSLLSVLLSMQGAVNKLCEEMLDNRATLQ
QLH55813.1:3860-3942 (6)	nsp7 [polyprotein=ORF1ab polyprotein] [organism=Severe acute respiratory syndrome coronavirus 2] [isolate=SARS-CoV-2/human/BGD/BCSIR_NILMRC_245/2020]	SKMSDVKCTSVVLLSVLQQLRVESSSKLWAQCVQLHNDILLAKDTTEAFEKMVSLLSVLLSMQGAVDINKLCEEMLDNRAALQ
QNO84201.1:3860-3941 (6)	nsp7 [polyprotein=ORF1ab polyprotein] [organism=Severe acute respiratory syndrome coronavirus 2] [isolate=SARS-CoV-2/human/AUS/VIC5741/2020]	SKMSDVKCTSVVLLSVLQQLRVESSSKLWAQCVQLHNDILLAKDTEAFEKMVSLLSVLLSMQGAVDINKLCEEMLDNRATLQ
QUM18412.1:3860-3942 (6)	nsp7 [polyprotein=ORF1ab polyprotein] [organism=Severe acute respiratory syndrome coronavirus 2] [isolate=SARS-CoV-2/human/USA/MN-CDC-IBX392387950229/2021]	SKMSDVKCTSVVLLSVLQHLRVESSSKLWAQCVQLHNDILLAKDTTEAFEKMVSLLSVLLSMQGAVDINKLCEEMLDNRATLQ
QRG04258.1:3860-3942 (6)	nsp7 [polyprotein=ORF1ab polyprotein] [organism=Severe acute respiratory syndrome coronavirus 2] [isolate=SARS-CoV-2/human/USA/CA-CZB-14887/2020]	SKMSDVKCTSVVLLSVLQQLRVESSSKLWAQCVQLHNDILLAKDTTEAFEKMVSLLSVLLSMQGAVDINKLCEEMLDDRATLQ
QUG11398.1:3857-3939 (6)	nsp7 [polyprotein=ORF1ab polyprotein] [organism=Severe acute respiratory syndrome coronavirus 2] [isolate=SARS-CoV-2/human/USA/MA-MASPHL-03206/2021]	SKMSDVKCXSVVLLSVLQQLRVESSSKLWAQCVQLHNDILLAKDTTEAFEKMVSLLSVLLSMQGAVDINKLCEEMLDNRATLQ
QOJ41793.1:3860-3942 (6)	nsp7 [polyprotein=ORF1ab polyprotein] [organism=Severe acute respiratory syndrome coronavirus 2] [isolate=SARS-CoV-2/human/USA/UT-05520/2020]	SKMSDVKCTSVVJLSVLQQLRVESSSKLWAQCVQLHNDILLAKDTTEAFEKMVSLLSVLLSMQGAVDINKLCEEMLDNRATLQ
QRC45227.1:3860-3942 (6)	nsp7 [polyprotein=ORF1ab polyprotein] [organism=Severe acute respiratory syndrome coronavirus 2] [isolate=SARS-CoV-2/human/USA/VT-CDC-2-4044544/2020]	SKMSDVKCTSVVLLSVLQQLRVESSSKLWAQCXQLHNDILLAKDTTEAFEKMVSLLSVLLSMQGAVDINKLCEEMLDNRATLQ
UBW90749.1:3860-3942 (6)	nsp7 [polyprotein=ORF1ab polyprotein] [organism=Severe acute respiratory syndrome coronavirus 2] [isolate=SARS-CoV-2/human/USA/TN-VUMC-000150/2020]	SKMSDVKCTSVVLLSVLQQLRVESSSKLWAQCVQLHNDILLAKDTTEAFEKMVSLLSVLLSMQGAVDINKLCEEMLDNRATLX
QSM23114.1:3860-3942 (6)	nsp7 [polyprotein=ORF1ab polyprotein] [organism=Severe acute respiratory syndrome coronavirus 2] [isolate=SARS-CoV-2/human/USA/CA-CZB-17102/2020]	SKMSDVKCTSVVLLSVLQQLRVESSSKLWAQCVQLHNDILLAKDTTEAFEKMVSLLSVLLSMQXAVDINKLCEEMLDNRATLQ
QJZ28357.1:3860-3942 (6)	nsp7 [polyprotein=ORF1ab polyprotein] [organism=Severe acute respiratory syndrome coronavirus 2] [isolate=SARS-CoV-2/human/EGY/CUNCI-HGC021/2020]	SKMSDVKCTSVVLLSVLQQLRVESSSKLWAQCVQLHNDILLAKDTTEAFEKMVSLLSVLLSMQGXVDINKLCEEMLDNRATLQ
QVI47391.1:3860-3942 (6)	nsp7 [polyprotein=ORF1ab polyprotein] [organism=Severe acute respiratory syndrome coronavirus 2] [isolate=SARS-CoV-2/human/USA/CA-CZB-29749/2021]	SKMSDVKCTSVVLLSVLQQLRVESSSKLWAQCVQLHNDILLXKDTTEAFEKMVSLLSVLLSMQGAVDINKLCEEMLDNRATLQ
UGR99165.1:3860-3942 (6)	nsp7 [polyprotein=ORF1ab polyprotein] [organism=Severe acute respiratory syndrome coronavirus 2] [isolate=SARS-CoV-2/human/USA/WI-CDC-FG-185172/2021]	SKMSDVKCTSVVLLSVLQQLRVESSSTLWAQCVQLHNDILLAKDTTEAFEKMVSLLSVLLSMQGAVDINKLCEEMLDNRATLQ
QKM75685.1:3860-3942 (6)	nsp7 [polyprotein=ORF1ab polyprotein] [organism=Severe acute respiratory syndrome coronavirus 2] [isolate=SARS-CoV-2/human/BGD/DNAS_RAB_isl_82_BGD/2020]	SKMSDVKCTSVVLLSVLQQLRVESSSKXXXXXVQLHNDILLAKDTTEAFEKMVSLLSVLLSMQGAVDINKLCEEMLDNRATLQ
QSW63251.1:3860-3942 (6)	nsp7 [polyprotein=ORF1ab polyprotein] [organism=Severe acute respiratory syndrome coronavirus 2] [isolate=SARS-CoV-2/human/USA/CA-CZB-25135/2020]	XXXXXXXXXSVVLLSVLQQLRVESSSKLWAQCVQLHNDILLAKDTTEAFEKMVSLLSVLLSMQGAVDINKLCEEMLDNRATLQ
QUE36833.1:3857-3939 (6)	nsp7 [polyprotein=ORF1ab polyprotein] [organism=Severe acute respiratory syndrome coronavirus 2] [isolate=SARS-CoV-2/human/USA/MI-CDC-ASC210043636/2021]	SKMSDVKCTSVVLLSVLQQLRVESSSKLWAQCVQLHNDILLAKDTTEAFEKMVSLLSVLLSMQGAVYINKLCEEMLDNRATLQ
UOW97355.1:3856-3938 (6)	nsp7 [polyprotein=ORF1ab polyprotein] [organism=Severe acute respiratory syndrome coronavirus 2] [isolate=SARS-CoV-2/human/USA/SC-COVID22-2494/2022]	SKMSDAKCTSVVLLSVLQQLRVESSSKLWAQCVQLHNDILLAKDTTEAFEKMVSLLSVLLSMQGAVDINKLCEEMLDNRATLQ
UJP27795.1:3856-3938 (6)	nsp7 [polyprotein=ORF1ab polyprotein] [organism=Severe acute respiratory syndrome coronavirus 2] [isolate=SARS-CoV-2/human/USA/TX-CDC-STM-A4B7B3RWZ/2022]	SKMSDVKCTSVVLLSVLQQLRVESSSKLWAQCVQLHNDILLAKDTTEAFEKMVSLLSVLLSMQGAXDINKLCEEMLDNRATLQ
UAZ08179.1:3857-3939 (6)	nsp7 [polyprotein=ORF1ab polyprotein] [organism=Severe acute respiratory syndrome coronavirus 2] [isolate=SARS-CoV-2/human/USA/NM-UNM-TC241309/2021]	SKXSDVKCTSVVLLSVLQQLRVESSSKLWAQCVQLHNDILLAKDTTEAFEKMVSLLSVLLSMQGAVDINKLCEEMLDNRATLQ
QMT91610.1:3860-3942 (6)	nsp7 [polyprotein=ORF1ab polyprotein] [organism=Severe acute respiratory syndrome coronavirus 2] [isolate=SARS-CoV-2/human/USA/WA-S1751/2020]	SKMSDVKCTSVXLLSVLQQLRVESSSKLWAQCVQLHNDILLAKDTTEAFEKMVSLLSVLLSMQGAVDINKLCEEMLDNRATLQ
QSE07159.1:3860-3942 (6)	nsp7 [polyprotein=ORF1ab polyprotein] [organism=Severe acute respiratory syndrome coronavirus 2] [isolate=SARS-CoV-2/human/USA/MA-CDC-QDX21644766/2021]	SKMSDVKCTSVVLLSVLQQLRVESSSKLWAQCVQLHNDILLAKDTTEAFEKMVSLLSVLLSMQGAVDINKLCEEMLDNMATLQ
QRA19954.1:3860-3942 (6)	nsp7 [polyprotein=ORF1ab polyprotein] [organism=Severe acute respiratory syndrome coronavirus 2] [isolate=SARS-CoV-2/human/USA/WA-S3648/2021]	SKMSDVKCTSVVLLSVLQQLRVESSSKLWAQCVQLHNDILLAKNTTEAFEKMVSLLSVLLSMQGAVDINKLCEEMLDNRATLQ
QSO32506.1:3860-3942 (6)	nsp7 [polyprotein=ORF1ab polyprotein] [organism=Severe acute respiratory syndrome coronavirus 2] [isolate=SARS-CoV-2/human/USA/NC-CDC-2-3851532/2021]	SKMSDVKCTSVVLLSVLQQLRVESSSKLWAXCVQLHNDILLAKDTTEAFEKMVSLLSVLLSMQGAVDINKLCEEMLDNRATLQ
UGL17253.1:3860-3942 (6)	nsp7 [polyprotein=ORF1ab polyprotein] [organism=Severe acute respiratory syndrome coronavirus 2] [isolate=SARS-CoV-2/human/USA/MO-CDC-ASC210482845/2021]	SKMSDVKCTSVVLLSVLQQLRVESSSKLWAQCVQLHNDILLAKDITEAFEKMVSLLSVLLSMQGAVDINKLCEEMLDNRTTLQ
UBW90941.1:3860-3942 (4)	nsp7 [polyprotein=ORF1ab polyprotein] [organism=Severe acute respiratory syndrome coronavirus 2] [isolate=SARS-CoV-2/human/USA/TN-VUMC-000131/2020]	SKMSDVKCTSVVLLSVLQQLRVESSSKLWAQCVQLHNDILLAKDTTEAFEKMVSLLSVLLSMQGAVDINKLCEEMXXXXXXXX
QWE90254.1:3857-3939 (4)	nsp7 [polyprotein=ORF1ab polyprotein] [organism=Severe acute respiratory syndrome coronavirus 2] [isolate=SARS-CoV-2/human/USA/GA-CDC-4133982-001/2021]	SKMSDVKCTSVVLLSXLQQLRVESSSKLWAQCVQLHNDILLAKDTTEAFEKMVSLLSVLLSMQGAVDINKLCEEMLDNRATLQ
UGB63011.1:3859-3941 (4)	nsp7 [polyprotein=ORF1ab polyprotein] [organism=Severe acute respiratory syndrome coronavirus 2] [isolate=SARS-CoV-2/human/USA/OH-CDC-ASC210396664/2021]	SKMSDVKCTSVVLLSVLQQLRVESSSKLWAQCVQLHNDILLAKDTTEAFEKMVSLLSVLLSMQGAVXXNKLCEEMLDNRATLQ
QVI17783.1:3857-3939 (4)	nsp7 [polyprotein=ORF1ab polyprotein] [organism=Severe acute respiratory syndrome coronavirus 2] [isolate=SARS-CoV-2/human/USA/RI-CDC-2-4331864/2021]	SKMSDVKCTSVVLLSVLQQLRVESSSKLWAQCVQLHNDILLAKDTTEAFEKXVSLLSVLLSMQGAVDINKLCEEMLDNRATLQ
QXE76795.1:3860-3942 (4)	nsp7 [polyprotein=ORF1ab polyprotein] [organism=Severe acute respiratory syndrome coronavirus 2] [isolate=SARS-CoV-2/human/USA/NV-NSPHL-352335/2021]	SKMSDVKCTSVVLLSVLQQLRXESSSKLWAQCVQLHNDILLAKDTTEAFEKMVSLLSVLLSMQGAVDINKLCEEMLDNRATLQ
ULU39932.1:3856-3938 (4)	nsp7 [polyprotein=ORF1ab polyprotein] [organism=Severe acute respiratory syndrome coronavirus 2] [isolate=SARS-CoV-2/human/USA/FL-CDC-ASC210699587/2022]	SKMSDVKCTSVVLLSVLQQLRVESSSKLWAQCVQLHNDILLAKDTTEAFEKMVSLLSVLLSMQGAVEINKLCEEMLDNRATLQ
UMR45617.1:3856-3938 (4)	nsp7 [polyprotein=ORF1ab polyprotein] [organism=Severe acute respiratory syndrome coronavirus 2] [isolate=SARS-CoV-2/human/USA/CA-CDC-FG-285751/2022]	SKMSDVKCTSVVLLSVLQQLRVESSSKLWAQCVQLHNDILLAKDTTDAFEKMVSLFSVLLSMQGAVDINKLCEEMLDNRATLQ
QTQ52098.1:3860-3942 (4)	nsp7 [polyprotein=ORF1ab polyprotein] [organism=Severe acute respiratory syndrome coronavirus 2] [isolate=SARS-CoV-2/human/USA/FL-BPHL-1969/2021]	SKMSDVKCTSVVLLSVLQQLRVESSSKLWAQCVQLHNDILLAKDTTEAFEEMVSLLSVLLSMQGAVDINKLCEEMLDNRATLQ
UIX78761.1:3860-3942 (4)	nsp7 [polyprotein=ORF1ab polyprotein] [organism=Severe acute respiratory syndrome coronavirus 2] [isolate=SARS-CoV-2/human/USA/CO-CDC-MMB12253661/2021]	SKMSDVKCTSVVLLSVLQQLRVESSSKLWAQCVQLHNDILLAKDTTEAFEKMVSLXXXXXXXXXAVDINKLCEEMLDNRATLQ
QVU61534.1:3857-3939 (4)	nsp7 [polyprotein=ORF1ab polyprotein] [organism=Severe acute respiratory syndrome coronavirus 2] [isolate=SARS-CoV-2/human/USA/NJ-CDC-STM-000068071/2021]	SKMSDVKCTSVVLLSVLQQLRVESSSKLWAQCVQLHNDILLAKDTTEAFEKMVSLLSVLLSMQGAVNINKLCEEMLDNRATLQ
UII87511.1:3860-3942 (4)	nsp7 [polyprotein=ORF1ab polyprotein] [organism=Severe acute respiratory syndrome coronavirus 2] [isolate=SARS-CoV-2/human/USA/JW4136/2021]	SKMSDVKCTSVVLLSVLQQLRVESSSKLWAQCVQLHNDILLAKDTTEAFENMVSLLSVLLSMQGAVDINKLCEEMLDNRATLQ
QTU81952.1:3860-3942 (4)	nsp7 [polyprotein=ORF1ab polyprotein] [organism=Severe acute respiratory syndrome coronavirus 2] [isolate=SARS-CoV-2/human/USA/CA-CZB-27504/2021]	SKMSDVKCTSVVLLSVLQQLRVESSSKLWAQCVQLHNDILLAKDTTEAFEKMVSLLSVLLSXQGAVDINKLCEEMLDNRATLQ
UFR49524.1:3860-3942 (4)	nsp7 [polyprotein=ORF1ab polyprotein] [organism=Severe acute respiratory syndrome coronavirus 2] [isolate=SARS-CoV-2/human/USA/NM-CDC-QDX31136736/2021]	SKMSDLKCTSVVLLSVLQQLRVESSSKLWAQCVQLHNDILLAKDTTEAFEKMVSLLSVLLSMQGAVDINKLCEEMLDNRATLQ
UIK27788.1:3860-3942 (4)	nsp7 [polyprotein=ORF1ab polyprotein] [organism=Severe acute respiratory syndrome coronavirus 2] [isolate=SARS-CoV-2/human/USA/GA-CDC-MMB12053649/2021]	SKMSDVKCTSVVLLSVLQQLRVESSSKLWAQCVQLHNDILLAKDTTEAFEKMVSLLSVLLSMHGAIDINKLCEEMLDNRATLQ
UNR46552.1:3857-3939 (4)	nsp7 [polyprotein=ORF1ab polyprotein] [organism=Severe acute respiratory syndrome coronavirus 2] [isolate=SARS-CoV-2/human/USA/MA-Broad-CRSP_O5VCRLZ3EJUHN2IH/2022]	XXXSDVKCTSVVLLSVLQQLRVESSSKLWSQCVQLHNDILLAKDTTEAFEKMVSLLSVLLSMQGAVDINKLCEEMLDNRATLQ
QRG12883.1:3860-3942 (4)	nsp7 [polyprotein=ORF1ab polyprotein] [organism=Severe acute respiratory syndrome coronavirus 2] [isolate=SARS-CoV-2/human/USA/CA-CZB-14956/2020]	SKXXXXXXXSVVLLSVLQQLRVESSSKLWAQCVQLHNDILLAKDTTEAFEKMVSLLSVLLSMQGAVDINKLCEEMLDNRATLQ
UPA45803.1:3856-3938 (4)	nsp7 [polyprotein=ORF1ab polyprotein] [organism=Severe acute respiratory syndrome coronavirus 2] [isolate=SARS-CoV-2/human/USA/MP-CDC-2-5800036/2022]	SKMSDVKCTSVVLLSVLXQLRVESSSKLWAQCVQLHNDILLAKDTTEAFEKMVSLLSVLLSMQGAVDINKLCEEMLDNRATLQ
UHV23434.1:3856-3938 (4)	nsp7 [polyprotein=ORF1ab polyprotein] [organism=Severe acute respiratory syndrome coronavirus 2] [isolate=SARS-CoV-2/human/USA/GA-CDC-MMB12232242/2021]	SKMSDVKCTSVVLLSVLQQLRVESSSKLWAQCVQLHNDILLAKDTTEAFEKXXXXXXXXXXXXXAVDINKLCEEMLDNRATLQ
UGR89710.1:3860-3942 (4)	nsp7 [polyprotein=ORF1ab polyprotein] [organism=Severe acute respiratory syndrome coronavirus 2] [isolate=SARS-CoV-2/human/USA/CA-CDC-FG-185263/2021]	SKMSDVKCTSVVLLSVLQQLRVESSSKLWAQCVELHNDILLAKDTTEAFEKMVSLLSVLLSMQGAVDINKLCEEMLDNRATLQ
UGA61114.1:3860-3942 (4)	nsp7 [polyprotein=ORF1ab polyprotein] [organism=Severe acute respiratory syndrome coronavirus 2] [isolate=SARS-CoV-2/human/USA/CO-CDC-MMB11400255/2021]	SKMSDVKCTSVVLLSVLHQLRVESSSKLWAQCVQLHNDILLAKDTTEAFEKMVSLLSVLLSMQGAVDINKLCEEMLDNRATLQ
UDO26436.1:3860-3942 (4)	nsp7 [polyprotein=ORF1ab polyprotein] [organism=Severe acute respiratory syndrome coronavirus 2] [isolate=SARS-CoV-2/human/USA/CA-CDPH-2000015746/2020]	SKMSDVKCTSVVLLSVLQQLRVESSSKLWAQCIQLHNDILLAKDTTEAFGKMVSLLSVLLSMQGAVDINKLCEEMLDNRATLQ
UGB68861.1:3860-3942 (4)	nsp7 [polyprotein=ORF1ab polyprotein] [organism=Severe acute respiratory syndrome coronavirus 2] [isolate=SARS-CoV-2/human/USA/MI-CDC-ASC210426570/2021]	SKMSDVKCTSVVLLSVLQQLRVESSSKLWAQCVQLHNDILLAKDTTEAFEKMVSLLSVLLSMYGAVDINKLCEEMLDNRATLQ
QWA53385.1:3857-3939 (4)	nsp7 [polyprotein=ORF1ab polyprotein] [organism=Severe acute respiratory syndrome coronavirus 2] [isolate=SARS-CoV-2/human/DEU/SARS-CoV-2_B.1.351_VeroE6_210226_P4/2021]	SKMSDVKCTSVVLLSVLQQLRVESSSKLWAQCVQLHNDILLAXDTTEAFEKMVSLLSVLLSMQGAVDINKLCEEMLDNRATLQ
ULH75777.1:3860-3942 (4)	nsp7 [polyprotein=ORF1ab polyprotein] [organism=Severe acute respiratory syndrome coronavirus 2] [isolate=SARS-CoV-2/human/IND/INSACOG-GBRC1362/2020]	SKMSDVKCTSVVLLSVLQQLRVESSSKLWAQCVQLHNDILLAKDTTEAFEKMVSLLSVLLSXXXXXXXXXXXXXXXXXXXXXX
ULV53043.1:3856-3938 (4)	nsp7 [polyprotein=ORF1ab polyprotein] [organism=Severe acute respiratory syndrome coronavirus 2] [isolate=SARS-CoV-2/human/USA/WI-CDC-MMB14125221/2022]	SKMSDVKCTSVVLLSVLQQLRVESSSKLWAQCVQLHNDILLAKDTTEAFEKMVSLLSXLXSMQGAVDINKLCEEMLDNRATLQ
UHF06233.1:3860-3942 (4)	nsp7 [polyprotein=ORF1ab polyprotein] [organism=Severe acute respiratory syndrome coronavirus 2] [isolate=SARS-CoV-2/human/USA/WI-CDC-ASC210401589/2021]	SKMSDVKCTSVVLLSVLQQLRVESSSKLWAQCVQLHNDILLAKDTTEAFEKMVSLLSVLLSMQGAVDINKLCEEMLDNRATXQ
QSV75867.1:3860-3942 (4)	nsp7 [polyprotein=ORF1ab polyprotein] [organism=Severe acute respiratory syndrome coronavirus 2] [isolate=SARS-CoV-2/human/USA/NM-CDC-QDX22440491/2021]	XXXXXXXXXXXXXXXXLQQLRVESSSKLWAQCIQLHNDILLAKDTTEAFEKMVSLLSVLLSMQGAVDINKFCEEMLDNRATLQ
UDB12730.1:3857-3939 (4)	nsp7 [polyprotein=ORF1ab polyprotein] [organism=Severe acute respiratory syndrome coronavirus 2] [isolate=SARS-CoV-2/human/USA/CA-SEARCH-104971/2021]	SKMSDVKCTSVVLLSVLQQLRVESSSKLWAQCVQLHNDILLAKDTTEAFEKMVSLLSVLLFMQGAVDINKLCEEMLDNRATLQ
QTH19255.1:3857-3939 (4)	nsp7 [polyprotein=ORF1ab polyprotein] [organism=Severe acute respiratory syndrome coronavirus 2] [isolate=SARS-CoV-2/human/USA/CA-LACPHL-AF00709/2021]	SKMSDVKCTSVVLLSVLQQLRVESSSKLWAQCVQLHNDILLAKDTTEAFEKMVSLLSVFLSMQGAVDINKLCEEMLDNRATLQ
UHZ12966.1:3856-3938 (4)	nsp7 [polyprotein=ORF1ab polyprotein] [organism=Severe acute respiratory syndrome coronavirus 2] [isolate=SARS-CoV-2/human/USA/TX-CDC-ASC210566824/2021]	SKMSDVKCTSVVLLSVLQQLRVESSSKLXAQCVQLHNDILLAKDTTEAFEKMVSLLSVLLSMQGAVDINKLCEEMLDNRATLQ
QTG44250.1:3860-3942 (4)	nsp7 [polyprotein=ORF1ab polyprotein] [organism=Severe acute respiratory syndrome coronavirus 2] [isolate=SARS-CoV-2/human/USA/WV-CDC-LC0025709/2021]	SKMSDVKCTSVVLLSVLQQLRVESSSKLWAQCFQLHNDILLAKDTTEAFEKMVSLLSVLLSMQGAVDINKLCEEMLDNRATLQ
URA74754.1:3857-3939 (4)	nsp7 [polyprotein=ORF1ab polyprotein] [organism=Severe acute respiratory syndrome coronavirus 2] [isolate=SARS-CoV-2/human/BRA/GO-NVBS2543GENOV700800052482/2021]	SKMSDVKCTSVVLLSVLQQLRVESSSKLWAQCVQLHNDILLAKDTTEAFEKMVSLLSVLLSMQGAVDLNKLCEEMLDNRATLQ
UFY57424.1:3860-3942 (4)	nsp7 [polyprotein=ORF1ab polyprotein] [organism=Severe acute respiratory syndrome coronavirus 2] [isolate=SARS-CoV-2/human/USA/TN-CDC-ASC210424288/2021]	SKMSDVKCTSVVLLSVLQQLRVESSSKLWAQCVQLHNDILLAKDTTEAFEKMVSLLSVLLSMQGAVDINKLCEEMLDNRAXXX
UFQ73722.1:3860-3942 (4)	nsp7 [polyprotein=ORF1ab polyprotein] [organism=Severe acute respiratory syndrome coronavirus 2] [isolate=SARS-CoV-2/human/USA/TN-VUMC-001117/2021]	XXXXDVKCTSVVLLSVLQQLRVESSSKLWAQCVQLHNDILLAKDTTEAFEKMVSLLSVLLSMQGAVDINKLCEEMLDNRATLQ
QWZ36392.1:3857-3939 (4)	nsp7 [polyprotein=ORF1ab polyprotein] [organism=Severe acute respiratory syndrome coronavirus 2] [isolate=SARS-CoV-2/human/USA/MN-UMGC-3676/2021]	SKMSDVKCTSVVLLSVLQQLRVESSSKLWAECVQLHNDILLAKDTTEAFEKMVSLLSVLLSMQGAVDINKLCEEMLDNRATLQ
QUM95486.1:3857-3939 (4)	nsp7 [polyprotein=ORF1ab polyprotein] [organism=Severe acute respiratory syndrome coronavirus 2] [isolate=SARS-CoV-2/human/USA/NH-CDC-QDX23849708/2021]	XXXXXXXXXXXXXXXXLQQLRVESSSKLWAQCVQLHNDILLAKDTTEAFEKMVSLFSVLLSMQGAVDINKLCEEMLDNRATLQ
UNW29374.1:3856-3938 (4)	nsp7 [polyprotein=ORF1ab polyprotein] [organism=Severe acute respiratory syndrome coronavirus 2] [isolate=SARS-CoV-2/human/USA/VT-Broad-CRSP_OXMYLHCMKB5G44QC/2022]	SXXSDVKCTSVVLLSVLQQLRVESSSKLWAQCVQLHNDILLAKDTTEAFEKMVSLLSVLLSMQGAVDINKLCEEMLDNRATLQ
QZK08285.1:3860-3942 (4)	nsp7 [polyprotein=ORF1ab polyprotein] [organism=Severe acute respiratory syndrome coronavirus 2] [isolate=SARS-CoV-2/human/USA/TG724660/2020]	SKMSDVKCTSVVLLSVLQQLRVESSSKLWAQCVQLHNDILLAKDTTEAFEKMVSLLSVLLSMQGAVDXNKLCEEMLDNRATLQ
ULH38717.1:3860-3942 (4)	nsp7 [polyprotein=ORF1ab polyprotein] [organism=Severe acute respiratory syndrome coronavirus 2] [isolate=SARS-CoV-2/human/USA/CUMC-21081088/2021]	SKMSDVKCTSVVLLSVLQQLRVESSSKLXXXXXXXXXXXXXXXXXXXXXXXXXXLLSVLLSMQGAVDINKLCEEMLDNRATLQ
UJX38554.1:3856-3938 (4)	nsp7 [polyprotein=ORF1ab polyprotein] [organism=Severe acute respiratory syndrome coronavirus 2] [isolate=SARS-CoV-2/human/USA/VI-CDC-2-5442208/2022]	SKMSDVKXTSVVLLSVLQQLRVESSSKLWAQCVQLHNDILLAKDTTEAFEKMVSLLSVLLSMQGAVDINKLCEEMLDNRATLQ
UMQ81938.1:3856-3938 (4)	nsp7 [polyprotein=ORF1ab polyprotein] [organism=Severe acute respiratory syndrome coronavirus 2] [isolate=SARS-CoV-2/human/USA/TN-VUMC-O-2324/2021]	SKMSDVKCTSVVLLSVLQQLRVESSSXXXXXCVQLHNDILLAKDTTEAFEKMVSLLSVLLSMQGAVDINKLCEEMXXXXXXLQ
UHZ95675.1:3860-3942 (4)	nsp7 [polyprotein=ORF1ab polyprotein] [organism=Severe acute respiratory syndrome coronavirus 2] [isolate=SARS-CoV-2/human/USA/MD-CDC-MMB11948429/2021]	SKMSDVKCTSVVVLSVLQQLRVESSSKLWAQCVQLHNDILLAKDTTEAFEKMVSLLSVLLSMQGAVDINKLCEEMLDNRATLQ
QNL13104.1:3860-3942 (4)	nsp7 [polyprotein=ORF1ab polyprotein] [organism=Severe acute respiratory syndrome coronavirus 2] [isolate=SARS-CoV-2/human/USA/WI-UW-1178/2020]	SKMSDVKCTSVVLLSVLQQLRVESLSKLWAQCVQLHNDILLAKDTTEAFXKMVSLLSVLLSMQGAVDINKLCEEMLDNRATLQ
BDH38657.1:3856-3938 (4)	nsp7 [polyprotein=ORF1a polyprotein] [organism=Severe acute respiratory syndrome coronavirus 2] [isolate=hCoV-19/Japan/SZ-NIG-Y213493/2022]	SKMSDVKCTSVVLLSVLQQLRVESSSKLWAQCVQLHNDILIAKDTTEAFEKMVSLLSVLLSMQGAVDINKLCEEMLDNRATLQ
UHY27148.1:3860-3942 (4)	nsp7 [polyprotein=ORF1ab polyprotein] [organism=Severe acute respiratory syndrome coronavirus 2] [isolate=SARS-CoV-2/human/USA/MI-CDC-STM-2ANGMGVN3/2021]	SKMSDVKCTSVVLLSVLQQLRVESSSKLWAQCVQLHNDILLAKDTTXAFEKMVSLLSVLLSMQGAVDINKLCEEMLDNRATLQ
UGX54347.1:3860-3942 (4)	nsp7 [polyprotein=ORF1ab polyprotein] [organism=Severe acute respiratory syndrome coronavirus 2] [isolate=SARS-CoV-2/human/USA/CA-CDC-ASC210489073/2021]	SKMSDVKCTSVVLLSVLQQLRVESSYKLWAQCVQLHNDILLAKDTTEAFEKMVSLLSVLLSMQGAVDINKLCEEMLDNRATLQ
UHY26670.1:3860-3942 (4)	nsp7 [polyprotein=ORF1ab polyprotein] [organism=Severe acute respiratory syndrome coronavirus 2] [isolate=SARS-CoV-2/human/USA/IN-CDC-STM-5CGMDGF9U/2021]	SKMSDVKCTSVVLLSVLQQLRVESSSKLWAQCVQLHNDILLAKXTTEAFEKMVSLLSVLLSMQGAVDINKLCEEMLDNRATLQ
UOZ44910.1:3856-3938 (4)	nsp7 [polyprotein=ORF1ab polyprotein] [organism=Severe acute respiratory syndrome coronavirus 2] [isolate=SARS-CoV-2/human/USA/FL-CDC-ASC210849132/2022]	SKMSDVKCTSVVLLSVLQQLRVESSSKLWAQCVQLHNDILLAKDTTEAFEKMVSLLSVLLSMQGAVDIHKLCEEMLDNRATLQ
QSM30260.1:3860-3942 (4)	nsp7 [polyprotein=ORF1ab polyprotein] [organism=Severe acute respiratory syndrome coronavirus 2] [isolate=SARS-CoV-2/human/USA/CA-CZB-23295/2021]	SKMSDVKCTSVVLLSVLQXLRVESSSKLWAQCVQLHNDILLAKDTTEAFEKMVSLLSVLLSMQGAVDINKLCEEMLDNRATLQ
UHW09275.1:3860-3942 (4)	nsp7 [polyprotein=ORF1ab polyprotein] [organism=Severe acute respiratory syndrome coronavirus 2] [isolate=SARS-CoV-2/human/USA/NM-CDC-2-5277235/2021]	SKMTDVKCTSVVLLSVLQQLRVESSSKLWAQCVQLHNDILLAKDTTEAFEKMVSLLSVLLSMQGAVDINKLCEEMLDNRATLQ
UFY80603.1:3860-3942 (4)	nsp7 [polyprotein=ORF1ab polyprotein] [organism=Severe acute respiratory syndrome coronavirus 2] [isolate=SARS-CoV-2/human/USA/KY-CDC-ASC210485426/2021]	SKMSDVKCTSVVLLSVLQQLRVESSSKLWAQCVQLHNDILLAKDTTEAFEKMVSLLSVLLSMQGAVDRNKLCEEMLDNRATLQ
UAZ92652.1:3857-3939 (4)	nsp7 [polyprotein=ORF1ab polyprotein] [organism=Severe acute respiratory syndrome coronavirus 2] [isolate=SARS-CoV-2/human/USA/FL-CDC-STM-000044224/2021]	SKMSDVKCTSVVLLSVLQQLSVESSSKLWAQCVQLHNDILLAKDTTEAFEKMVSLLSVLLSMQGAVDINKLCEEMLDNRATLQ
UKN98548.1:3856-3938 (4)	nsp7 [polyprotein=ORF1ab polyprotein] [organism=Severe acute respiratory syndrome coronavirus 2] [isolate=SARS-CoV-2/human/USA/UT-UPHL-220202238530/2022]	SKMSDVKCTSVVLLSVLQQLRVESSSKLWAQCVQLHNDILLAKDTTEAYEKMVSLLSVLLSMQGAVDINKLCEEMLDNRATLQ
ULH89149.1:3856-3938 (4)	nsp7 [polyprotein=ORF1ab polyprotein] [organism=Severe acute respiratory syndrome coronavirus 2] [isolate=SARS-CoV-2/human/USA/NC-CDC-MMB14020539/2022]	SKMSDVKCTSVVLLSVLQQLRVESSSKXWAQCVQLHNDILLAKDTTEAFEKMVSLLSVLLSMQGAVDINKLCEEMLDNRATLQ
QVI40241.1:3857-3939 (4)	nsp7 [polyprotein=ORF1ab polyprotein] [organism=Severe acute respiratory syndrome coronavirus 2] [isolate=SARS-CoV-2/human/USA/CA-CZB-30358/2021]	SKMSDVKCTSVVLLSVLQQLRVESSSKLWAQCVQLHNDILLAKDTTEAFEKMVSLLSVLLSMQGAVDINKXXEEMLDNRATLQ
QSW06208.1:3860-3942 (4)	nsp7 [polyprotein=ORF1ab polyprotein] [organism=Severe acute respiratory syndrome coronavirus 2] [isolate=SARS-CoV-2/human/USA/CA-CZB-25285/2021]	SKMSDVKCTSVVLLSVLQQLRVESSSKLWAQCVQLHNDILLAKDTTEAFEKMVSLLSVLLSMQGAVDINKLCEEMLDBRATLQ
QPL24177.1:3860-3942 (4)	nsp7 [polyprotein=ORF1ab polyprotein] [organism=Severe acute respiratory syndrome coronavirus 2] [isolate=SARS-CoV-2/human/RUS/2272/2020]	SKMSDVKCTSVVLLSVLQQLRVESSSKLWAQCVQLHNDILLAKDTTEAFEKMVSLLSVLLSMQCAVDINKLCEEMLDNRATLQ
UIE78441.1:3860-3942 (4)	nsp7 [polyprotein=ORF1ab polyprotein] [organism=Severe acute respiratory syndrome coronavirus 2] [isolate=SARS-CoV-2/human/USA/CO-CDPHE-2101835205/2021]	SKMSDVKCTSVVLLSVLQQLRVESSSKLWAQXVQLHNDILLAKDTTEAFEKMVSLLSVLLSMQGAVDINKLCEEMLDNRATLQ
QVI45463.1:3860-3942 (4)	nsp7 [polyprotein=ORF1ab polyprotein] [organism=Severe acute respiratory syndrome coronavirus 2] [isolate=SARS-CoV-2/human/USA/CA-CZB-29323/2021]	SKMSDVKCTSVVLLSVLQQLRVESSSKLWAQCVQLHNDILLAKDTTEAFEKMVSLLSVXLSMQGAVDINKLCEEMLDNRATLQ
UFU93651.1:3857-3939 (4)	nsp7 [polyprotein=ORF1ab polyprotein] [organism=Severe acute respiratory syndrome coronavirus 2] [isolate=SARS-CoV-2/human/USA/UT-CDC-ASC210387438/2021]	SKMSDVKCTSVVLLSVLQQLRVESSSKLWAQCVQLHNDILLAKDTTEAFERMVSLLSALLSMQGAVDINKLCEEMLDNRATLQ
QQV29230.1:3857-3939 (4)	nsp7 [polyprotein=ORF1ab polyprotein] [organism=Severe acute respiratory syndrome coronavirus 2] [isolate=SARS-CoV-2/human/USA/FL-BPHL-0004/2021]	SKMSDVKCTSVVLLSVLQQLRVESSSKLWAQCVQLHNDILLAKDTTEAFEKMVSLLSVLLSMQRAVDINKLCEEMLDNRATLQ
QRX54610.1:3860-3942 (4)	nsp7 [polyprotein=ORF1ab polyprotein] [organism=Severe acute respiratory syndrome coronavirus 2] [isolate=SARS-CoV-2/human/USA/GA-CDC-LC0012825/2021]	SIMSDVKCTSVVLLSVLQQLRVESSSKLWAQCVQLHNDILLAKDTTEAFEKMVSLLSVLLSMQGAVDINKLCEEMLDNRATLQ
UGX12659.1:3860-3942 (4)	nsp7 [polyprotein=ORF1ab polyprotein] [organism=Severe acute respiratory syndrome coronavirus 2] [isolate=SARS-CoV-2/human/USA/NY-CDC-FG-188348/2021]	SKMSDVKCTSVVLLSVLQQLRVESSSKLWAQCVQLHNDILLAKDXTEAFEKMVSLLSVLLSMQGAVDINKLCEEMLDNRATLQ
UIG11198.1:3856-3938 (4)	nsp7 [polyprotein=ORF1ab polyprotein] [organism=Severe acute respiratory syndrome coronavirus 2] [isolate=SARS-CoV-2/human/USA/CA-CDC-FG-221515/2021]	SKMSDVKCTSVVLLSVLQQLRVESSSKLWAQCSQLHNDILLAKDTTEAFEKMVSLLSVLLSMQGAVDINKLCEEMLDNRATLQ
ULP19466.1:3856-3938 (4)	nsp7 [polyprotein=ORF1ab polyprotein] [organism=Severe acute respiratory syndrome coronavirus 2] [isolate=SARS-CoV-2/human/USA/CA-CDC-FG-274330/2022]	SKMSDVKCTSVVLLSVLQQLRVESSSKLWAQCVQLHTDILLAKDTTEAFEKMVSLLSVLLSMQGAVDINKLCEEMLDNRATLQ
UHQ89852.1:3860-3942 (4)	nsp7 [polyprotein=ORF1ab polyprotein] [organism=Severe acute respiratory syndrome coronavirus 2] [isolate=SARS-CoV-2/human/USA/CO-CDC-MMB11828218/2021]	SKMSDVKCTSVVLLSVLQQLRVESSSKLWAQCVQLHNDILLAKDTTEAFEKMVSLLSVLLSMQGAVDINKLCEEMLDHRATLQ
QNC69271.1:3860-3942 (4)	nsp7 [polyprotein=ORF1ab polyprotein] [organism=Severe acute respiratory syndrome coronavirus 2] [isolate=SARS-CoV-2/human/USA/Navy-CDC-3539458-001/2020]	SKMSDVKCTSVVLLSVLQQLRVESSSKLWAQCVQLHNDILLAKDTTEAFEKMVXLLSVLLSMQGAVDINKLCEEMLDNRATLQ
UHI26785.1:3860-3942 (4)	nsp7 [polyprotein=ORF1ab polyprotein] [organism=Severe acute respiratory syndrome coronavirus 2] [isolate=SARS-CoV-2/human/USA/TX-CDC-ASC210522791/2021]	SKMSDVKCTSVVLLSVLQQLRVESSSKLWAQCVQLHNDILLAKDTTEAFEKMVSLLSVLLSMQGAVDINKLCEEMLENRATLQ
BDG13726.1:3856-3938 (3)	nsp7 [polyprotein=ORF1a polyprotein] [organism=Severe acute respiratory syndrome coronavirus 2] [isolate=hCoV-19/Japan/SZ-NIG-4-C2392/2022]	SKMSDVKCTSVVLLSVLQQLRVESSSKLWAQCVQLHNDILLAKDTTEAFEKMVSLLSVLLSMQGAVDINKLCEEMLDNRATLH
UFU61830.1:3860-3942 (2)	nsp7 [polyprotein=ORF1ab polyprotein] [organism=Severe acute respiratory syndrome coronavirus 2] [isolate=SARS-CoV-2/human/USA/PA-CDC-STM-V45XHYTXE/2021]	SKMSDVKCTSVVLLSVLQQLRVESSSKLWAQCVQLHNDILLAKDTTEAFEKMVSLLSVLLSMQGAVDINKLCEEMLDNXATLQ
QPF55272.1:3860-3942 (2)	nsp7 [polyprotein=ORF1ab polyprotein] [organism=Severe acute respiratory syndrome coronavirus 2] [isolate=SARS-CoV-2/human/USA/CA-CZB-11176/2020]	SKMSDVKCTSVVLLSVLQQLRVESSSKLWAQCVQLHNDILLAKDTTEAFEKMVSLLSVLLSMQGAVDINKLCEEMLBNRATLQ
QMI57726.1:3857-3939 (2)	nsp7 [polyprotein=ORF1ab polyprotein] [organism=Severe acute respiratory syndrome coronavirus 2] [isolate=SARS-CoV-2/human/KOR/CNUHV03-CA22/2020]	SKMSDVKCTSVVLLSVLQQLRVESSSKLWAQCVQLHNDILLAKDTTEAFEKMVSLLSVLLSMQGAVAINKLCEEMLDNRATLQ
UNA47471.1:3860-3942 (2)	nsp7 [polyprotein=ORF1ab polyprotein] [organism=Severe acute respiratory syndrome coronavirus 2] [isolate=SARS-CoV-2/human/BGD/NGRI-R2-O7/2020]	SKMSDVKCTSVVLLSVLQQLRVESSSKLWAQCVQLHXXXXXAKDTTEAFEKMVSLLSVLLSMQGAVDINKLCEEMLDNRATLQ
QYF53524.1:3857-3939 (2)	nsp7 [polyprotein=ORF1ab polyprotein] [organism=Severe acute respiratory syndrome coronavirus 2] [isolate=SARS-CoV-2/human/USA/CUIMC-NP-4461/2021]	SKMSDVKCTSVVLLSVLQQLRVESSSKLWAQCVQLHNDILLAKDTTEAFEKMVSLLSVLLSMQGAVDINKXCEEMLXNRATLQ
UFY73731.1:3860-3942 (2)	nsp7 [polyprotein=ORF1ab polyprotein] [organism=Severe acute respiratory syndrome coronavirus 2] [isolate=SARS-CoV-2/human/USA/CA-CDC-ASC210425903/2021]	SXXXXVKCTXXXLLSVXXQLRVXXXXXXXXXCVQLHNDILLAKDTTEAFEKMVSLLSVLLSMQGAVDINKLCEEMLDNRATLQ
UNA47366.1:3860-3942 (2)	nsp7 [polyprotein=ORF1ab polyprotein] [organism=Severe acute respiratory syndrome coronavirus 2] [isolate=SARS-CoV-2/human/BGD/NGRI-R2-22/2020]	SKMSDVKCTSVVLLSVLQQLRVXXXSKLWAQCVXXXXXXXXXKDTTEAFEKMVSLLSVLLSMQGAVDINKLCEEMLDNRATLQ
UJG83721.1:3856-3938 (2)	nsp7 [polyprotein=ORF1ab polyprotein] [organism=Severe acute respiratory syndrome coronavirus 2] [isolate=SARS-CoV-2/human/USA/NC-CDC-ASC210558140/2021]	SKMSDVKCTSVVLLSVLQQRRVESSSKLWAQCVQLHNDILLAKDTTEAFEKMVSLLSVLLSMQGAVDINKLCEEMLDNRATLQ
UNA13496.1:3856-3938 (2)	nsp7 [polyprotein=ORF1ab polyprotein] [organism=Severe acute respiratory syndrome coronavirus 2] [isolate=SARS-CoV-2/human/USA/CO-CDC-MMB14195595/2022]	SKMSDVKCTSVVLLSVLQQLRVXXXXXXXXXXXXXXXDILLAKDTTEAFEKMISLLSVLLSMQGAVDINKLCEEMLDNRATLQ
QKU52831.1:3860-3942 (2)	nsp7 [polyprotein=ORF1ab polyprotein] [organism=Severe acute respiratory syndrome coronavirus 2] [isolate=SARS-CoV-2/human/USA/WA-S165/2020]	SKMSDVKCTSVVLLSVLQQLRVESSSKLWAQCVQLHNDILLAKDTTEAFEKMVSLLSVLLSMXXXXDINKLCEEMLDNRATLQ
QYK39538.1:3860-3942 (2)	nsp7 [polyprotein=ORF1ab polyprotein] [organism=Severe acute respiratory syndrome coronavirus 2] [isolate=SARS-CoV-2/human/USA/WUSTL_000218_A123/2021]	SKMSDVKCTSVVLLSVLQQLRVESSSKLWAQCVQLHNDILLAKDTXEAFEKMVSLLSVLLSMQGAVDINKLCEEMLDNRATLQ
QUE08072.1:3857-3939 (2)	nsp7 [polyprotein=ORF1ab polyprotein] [organism=Severe acute respiratory syndrome coronavirus 2] [isolate=SARS-CoV-2/human/USA/MN-CDC-IBX147131927048/2021]	SKMSDVKCTSVVLLSVLQQLRVESPSKLWAQCVQLHNDILLAKDTTEAFEKMVSLLSVLLSMQGAVDINKLCEEMLDNRATLQ
QIZ97049.1:3860-3942 (2)	nsp7 [polyprotein=ORF1ab polyprotein] [organism=Severe acute respiratory syndrome coronavirus 2] [isolate=SARS-CoV-2/human/USA/AZ-ASU2923/2020]	SKMSDVKCTSVVLLSVXXXXRVESSSKLWAQCVQLHNDILLAKDTTEAFEKMVSLLSVLLSMQGAVDINKLCEEMLDNRATLQ
UGS97109.1:3860-3942 (2)	nsp7 [polyprotein=ORF1ab polyprotein] [organism=Severe acute respiratory syndrome coronavirus 2] [isolate=SARS-CoV-2/human/USA/CO-CDC-MMB11589015/2021]	SKMSDVKCTSVVLLSVLQQLRVXXXXXXXXXXXXXHNDILLAKDTTEAFEKMVSLFSVLLSMQGAVDINKLCEEMLDNRATLQ
QSE24562.1:3860-3942 (2)	nsp7 [polyprotein=ORF1ab polyprotein] [organism=Severe acute respiratory syndrome coronavirus 2] [isolate=SARS-CoV-2/human/USA/MO-CDC-QDX21753498/2021]	XXXXXXXXXXXXXXSVLQQLRVESSSKLWAQCVQLHNDILLAKDTTEAFEKMVSLLSVLLSMQGAVDINKLCEEMLDNRATLQ
QXE96276.1:3857-3939 (2)	nsp7 [polyprotein=ORF1ab polyprotein] [organism=Severe acute respiratory syndrome coronavirus 2] [isolate=SARS-CoV-2/human/USA/UT-UPHL-210609899622/2021]	SXMSXXKCTSVVLLSVLQQLRVESSSKLWAQCVQLHNDILLAKDTTEAFEKMVSLLSVLLSMQGAVDINKLCEEMLDNRATLQ
URC91545.1:3857-3939 (2)	nsp7 [polyprotein=ORF1ab polyprotein] [organism=Severe acute respiratory syndrome coronavirus 2] [isolate=SARS-CoV-2/human/USA/PA-CDC-LC0627747/2022]	SKMSDVKCTSVVLLSVLQQLRVESSSKLWAQCVQLHNDSLLAKDTTEAFEKMVSLLSVLLSMQGAVDINKLCEEMLDNRATLQ
QWY98810.1:3857-3939 (2)	nsp7 [polyprotein=ORF1ab polyprotein] [organism=Severe acute respiratory syndrome coronavirus 2] [isolate=SARS-CoV-2/human/USA/OR-CDC-2-4513187/2021]	SKMSDVKCTSVVLLSVLQQLRVESSSKLWAQCVQLHNDILLAKDTTEAFEKMVSLLSVLLSMQGAVDINKLCEEMLHNRATLQ
QSM19050.1:3860-3942 (2)	nsp7 [polyprotein=ORF1ab polyprotein] [organism=Severe acute respiratory syndrome coronavirus 2] [isolate=SARS-CoV-2/human/USA/CA-CZB-16725/2020]	SKMSDVKCTSVVLLSVLQQLRVESSSKLWAQCVQLHNDIXLAKDTTEAFEKMVSLLSVLLSMQGAVDINKLCEEMLDNRATLQ
UJQ76456.1:3856-3938 (2)	nsp7 [polyprotein=ORF1ab polyprotein] [organism=Severe acute respiratory syndrome coronavirus 2] [isolate=SARS-CoV-2/human/USA/VA-CDC-ASC210586544/2022]	SKMSDVKCTSVVLLSVLQQLRVESSSKLWAQCVQLHNDILLAKDTTEAFEKMVSLLSVLLSMQGAXXXNKXXEEMLDNRATLQ
UPY88035.1:3857-3939 (2)	nsp7 [polyprotein=ORF1ab polyprotein] [organism=Severe acute respiratory syndrome coronavirus 2] [isolate=SARS-CoV-2/human/USA/VA_FBCH_2711/2022]	SKMSDVKCTSVVLLSVLQKLRVESSSKLWAQCVQLHNGILLAKDTTEAFEKMVSLLSVLLSMQGAVDINKLCEEMLDNRATLQ
UID96037.1:3856-3938 (2)	nsp7 [polyprotein=ORF1ab polyprotein] [organism=Severe acute respiratory syndrome coronavirus 2] [isolate=SARS-CoV-2/human/USA/DC-CDC-ASC210567831/2021]	SKMSDVKCTSVVLLSVLQQLRVESSSKLWAQCVQLPNDILLAKDTTEAFEKMVSLLSVLLSMQGAVDINKLCEEMLDNRATLQ
UJZ09765.1:3856-3938 (2)	nsp7 [polyprotein=ORF1ab polyprotein] [organism=Severe acute respiratory syndrome coronavirus 2] [isolate=SARS-CoV-2/human/USA/VI-CDC-2-5419033/2021]	SKMSDVKCTSVVLLSVLQQLRVESSSXLWAQCVQLHNDILLAKDTTEAFEKMVSLLSVLLSMQGAVDINKLCEEMLDNRATLQ
UFY51344.1:3860-3942 (2)	nsp7 [polyprotein=ORF1ab polyprotein] [organism=Severe acute respiratory syndrome coronavirus 2] [isolate=SARS-CoV-2/human/USA/AZ-CDC-ASC210422776/2021]	SKMSDVKCTSVVLLSVLQQLRVESSSKLWAQCVQLHNDILLAKDTTEAFEKMVSLLSVLLSMQGAVDXXXXXXEMLDNRATLQ
QTJ79459.1:3860-3942 (2)	nsp7 [polyprotein=ORF1ab polyprotein] [organism=Severe acute respiratory syndrome coronavirus 2] [isolate=SARS-CoV-2/human/USA/OH-CDC-QDX23009000/2021]	XXXXXXXXXXXXXXXXLQQLRVESSSKLWAQCIQLHNDILLAKDTTEAFEKMVSLLSVLLSMQGAVDINKLCEEMLDNRATLQ
UMQ80190.1:3860-3942 (2)	nsp7 [polyprotein=ORF1ab polyprotein] [organism=Severe acute respiratory syndrome coronavirus 2] [isolate=SARS-CoV-2/human/USA/TN-VUMC-O-0025/2021]	SKMSDVKCTSVVLLSVLQQLRVESSSXXXXXXVQLHNDILLAKATTEAFEKMVSLLSVLLSMQGAVDINKLCEEMXXXXXXLQ
QSV32983.1:3860-3942 (2)	nsp7 [polyprotein=ORF1ab polyprotein] [organism=Severe acute respiratory syndrome coronavirus 2] [isolate=SARS-CoV-2/human/USA/UT-CDC-2-3935725/2021]	SKMSDVKCTSVVLLSVLQQLRVESSSKLWAQCVQLHNDILLAKDTTEAFEKMVSLLSVLLSMQGSVDINKLCEEMLDNRATLQ
UNA59447.1:3856-3938 (2)	nsp7 [polyprotein=ORF1ab polyprotein] [organism=Severe acute respiratory syndrome coronavirus 2] [isolate=SARS-CoV-2/human/USA/NC-CDC-MMB14453280/2022]	SKMSDVKCTSVVLLSVLQQLRVESSXXXXXXXXXXHNDILLAKDTTEAFEKMVSLLSVLLSMQGAVDINKLCEEMLDNRATLQ
QYV28620.1:3857-3939 (2)	nsp7 [polyprotein=ORF1ab polyprotein] [organism=Severe acute respiratory syndrome coronavirus 2] [isolate=SARS-CoV-2/human/USA/OH-CDC-2-4043615/2021]	SKMSDVKCTSVVLLSVLQQLRVESSSKLWAQCVQLHNDILLAKDTTEAFEKMVSLLSVLLSMQGAVDINKLCEEMLDNRXTLQ
UHM09142.1:3860-3942 (2)	nsp7 [polyprotein=ORF1ab polyprotein] [organism=Severe acute respiratory syndrome coronavirus 2] [isolate=SARS-CoV-2/human/HKG/VM20117929/2020]	SKMSDVKRTSVVLLSVLQQLRVESSSKLWAQCVQLHNDILLAKDTTEAFEKMVSLLSVLLSMQGAVDINKLCEEMLDNRATLQ
UGS68174.1:3860-3942 (2)	nsp7 [polyprotein=ORF1ab polyprotein] [organism=Severe acute respiratory syndrome coronavirus 2] [isolate=SARS-CoV-2/human/USA/MI-MDHHS-SC22075/2020]	XXXXXXXXXSVVLLSVLQQLRVESLSKLWAQCVQLHNDILLAKDTTEAFEKMVSLLSVLLSMQGAVDINKLCEEMLDNRATLQ
UJZ49880.1:3856-3938 (2)	nsp7 [polyprotein=ORF1ab polyprotein] [organism=Severe acute respiratory syndrome coronavirus 2] [isolate=SARS-CoV-2/human/USA/LA-CDC-STM-6N63BJA58/2022]	SKMSDVKCTSVVLLSVXQQLRVESSSKLWAQCVQLHNDILLAKDTTEAFEKMVSLLSVLLSMQGAVDINKLCEEMLDNRATLQ
UPH87338.1:3856-3938 (2)	nsp7 [polyprotein=ORF1ab polyprotein] [organism=Severe acute respiratory syndrome coronavirus 2] [isolate=SARS-CoV-2/human/FRA/IHUCOVID-071415-N1M/2022]	SKMSDVKCTSVVLLSVLQQLRVESSSKLWAKCVQLHNDILLAKDTTEAFEKMVSLLSVLLSMQGAVDINKLCEEMLDNRATLQ
QRA61221.1:3860-3942 (2)	nsp7 [polyprotein=ORF1ab polyprotein] [organism=Severe acute respiratory syndrome coronavirus 2] [isolate=SARS-CoV-2/human/USA/CA-QDX-3916/2021]	XXXXXXXCTSVVLLSVLQQLRVESSSKLWAQCCQLHNDILLAKDTTEAFEKMVSLLSVLLSMQGVVDINKLCEEMLDNRAILQ
UPD17719.1:3860-3942 (2)	nsp7 [polyprotein=ORF1ab polyprotein] [organism=Severe acute respiratory syndrome coronavirus 2] [isolate=SARS-CoV-2/human/FRA/IHUCOVID-011578_Illu1/2020]	SKMSDVKCTSVVLLSVLQQLRVESSSKLWAQCVQLHXDILLAKDTTEAFEKMVSLLSVLLSMQGAVDINKLCEEMLDNRATLQ
URG80651.1:3856-3938 (2)	nsp7 [polyprotein=ORF1ab polyprotein] [organism=Severe acute respiratory syndrome coronavirus 2] [isolate=SARS-CoV-2/human/USA/CA-CDPH-6000010176/2022]	SKMSGVKCTSVVLLSVLQQLRVESSSKLWAQCVQLHNDILLAKDTTEAFEKMVSLLSVLLSMQGAVDINKLCEEMLDNRATLQ
ULT77480.1:3853-3935 (2)	nsp7 [polyprotein=ORF1ab polyprotein] [organism=Severe acute respiratory syndrome coronavirus 2] [isolate=SARS-CoV-2/human/USA/VA-CDC-QDX33831769/2022]	SKMSDVKCTSVVLLSVLQQLRVESSSKLWAQCVQLHNDILLAKDTTEAFEKMVSLLXXXXXXXXXXXXXXXXXXXXXXXXXXQ
QVO98908.1:3860-3942 (2)	nsp7 [polyprotein=ORF1ab polyprotein] [organism=Severe acute respiratory syndrome coronavirus 2] [isolate=SARS-CoV-2/human/USA/IN-CDC-ASC210003936/2021]	SKMSDVKCTSVVLLSVLQQLRVESSSKLWAQCVRLHNDILLAKDTTEAFEKMVSLLSVLLSMQGAVDINKFCEEMLDNRATLQ
UHH37750.1:3860-3942 (2)	nsp7 [polyprotein=ORF1ab polyprotein] [organism=Severe acute respiratory syndrome coronavirus 2] [isolate=SARS-CoV-2/human/USA/LA-CDC-ASC210717100/2021]	SKMSDVKCTSVVLLSXXXQLRVESSSXXXAQCVQLHNDILLAKDTTEAFEKMVSLLSFLLSMQGAVDINKLCEEMLDNRATLQ
UMQ77740.1:3857-3939 (2)	nsp7 [polyprotein=ORF1ab polyprotein] [organism=Severe acute respiratory syndrome coronavirus 2] [isolate=SARS-CoV-2/human/USA/WI-CDC-2-5632197/2022]	SKMSDVXXXXXXXXXXXXXXXXXXXXXXXXXXXXXHNDILLAKDTTEAFEKMVSLLSVLLSMQGAVDINKLCEEMLDNRATLQ
UIW08761.1:3860-3942 (2)	nsp7 [polyprotein=ORF1ab polyprotein] [organism=Severe acute respiratory syndrome coronavirus 2] [isolate=SARS-CoV-2/human/USA/AL-CDC-ASC210571240/2021]	SKMSDVKCTSVVLLSVLQQLRVESSSKLWAQCVQLHNDILLAKDTTEAFEKMVSLLSVLLSMQGAVDINKLCEEMLDXXXXXX
UPC69285.1:3856-3938 (2)	nsp7 [polyprotein=ORF1ab polyprotein] [organism=Severe acute respiratory syndrome coronavirus 2] [isolate=SARS-CoV-2/human/USA/CA-SLOPH-C0980/2022]	SKMSDVKCTSVVLLSVLQQLRVESSSKLWAQCVQLHNDILXAKDTTEAFEKMVSLLSVLLSMQGAVDINKLCEEMLDNRATLQ
UHF43168.1:3860-3942 (2)	nsp7 [polyprotein=ORF1ab polyprotein] [organism=Severe acute respiratory syndrome coronavirus 2] [isolate=SARS-CoV-2/human/USA/PA-CDC-ASC210487942/2021]	SKMSDXKCTSXXXXSVLQQLRVESSSKLWXQCVQLHNDILLAKDTTEAFEKMVSLLSVLLSMQGAVDINKLCEEMLDNRATLQ
UHF45912.1:3860-3942 (2)	nsp7 [polyprotein=ORF1ab polyprotein] [organism=Severe acute respiratory syndrome coronavirus 2] [isolate=SARS-CoV-2/human/USA/WI-CDC-ASC210717436/2021]	SKMSDXKCTSXXLLSVLQQLRVESSSKLWAQCVQLHNDILLAKDTTEAFEKMVSLLSVLLSMQGAVDINKLCEEMLDNRATLQ
UJM73189.1:3860-3942 (2)	nsp7 [polyprotein=ORF1ab polyprotein] [organism=Severe acute respiratory syndrome coronavirus 2] [isolate=SARS-CoV-2/human/USA/MO-CDC-ASC210561489/2021]	SKMSDXXXXXXXXXXXXQQLRXESSXXXXXXCVQLHNDILLAKDTTEAFEKMVSLLSVLLSMQGAVDINKLCEEMLDNRATLQ
UMQ80629.1:3860-3942 (2)	nsp7 [polyprotein=ORF1ab polyprotein] [organism=Severe acute respiratory syndrome coronavirus 2] [isolate=SARS-CoV-2/human/USA/TN-VUMC-O-0063/2021]	SKMSDVKCTSVVLLSVLQQLRVESSSXXXXXXVQLHNDILLAKDTTEAFEKMVSLLSVLLSMQGAVDINKLCEEMXXXRATLQ
UIG20744.1:3860-3942 (2)	nsp7 [polyprotein=ORF1ab polyprotein] [organism=Severe acute respiratory syndrome coronavirus 2] [isolate=SARS-CoV-2/human/USA/CA-CDC-ASC210639850/2021]	SKISNVKCTSVVLLSVLQQLRVESSSKLWAQCVQLHNDILLAKDTTEAFEKMVSLLSVLLSMQGAVDINKLCEEMLDNRATLQ
UMQ81782.1:3856-3938 (2)	nsp7 [polyprotein=ORF1ab polyprotein] [organism=Severe acute respiratory syndrome coronavirus 2] [isolate=SARS-CoV-2/human/USA/TN-VUMC-O-2306/2021]	SKMSDVKCTSVVLLSVLQQLRVESSSXXXXXXVQLHNDILLAKDTTEAFEKMVSLLSVLLSMQGAVDINKLCEEMXDXRATLQ
UGC91775.1:3860-3942 (2)	nsp7 [polyprotein=ORF1ab polyprotein] [organism=Severe acute respiratory syndrome coronavirus 2] [isolate=SARS-CoV-2/human/USA/CO-CDC-MMB11530682/2021]	SKMSDVKCTSVVLLSVLQQLRVESSSKLWXXXVQLHNDILLAKDTTEAFEKMVSLLSVLLSMQGAVDINKLCEEMLDSRATLQ
QPI69751.1:3860-3942 (2)	nsp7 [polyprotein=ORF1ab polyprotein] [organism=Severe acute respiratory syndrome coronavirus 2] [isolate=SARS-CoV-2/human/USA/MD-MDH-0377/2020]	XXXXXXXXXXXXXLSVLQQLRVESLSKLWAQCVQLHNDILLAKDTTEAFEKMVSLLSVLLSMQGAVDINKLCEEMLDNRATLQ
UNY63630.1:3856-3938 (2)	nsp7 [polyprotein=ORF1ab polyprotein] [organism=Severe acute respiratory syndrome coronavirus 2] [isolate=SARS-CoV-2/human/USA/VA-CDC-QDX34884329/2022]	SKMSDVKCTSVXXXXXXXXXXXXXXXXXXXXXXXXXXXXXXAKDTTEAFEKMVSLLSVLLSMQGAVDINKLCEEMLDNRATLQ
UHI24751.1:3860-3942 (2)	nsp7 [polyprotein=ORF1ab polyprotein] [organism=Severe acute respiratory syndrome coronavirus 2] [isolate=SARS-CoV-2/human/USA/MI-CDC-ASC210525574/2021]	SKMSDVKCTSVVLLSVLQQLRVESSSKLWAQCVQLHNDILLAKDITEAFEKMVSLLSVLLSMQGAVDINKLCEEMLDNRAXLQ
UHZ95497.1:3860-3942 (2)	nsp7 [polyprotein=ORF1ab polyprotein] [organism=Severe acute respiratory syndrome coronavirus 2] [isolate=SARS-CoV-2/human/USA/OH-CDC-MMB11931843/2021]	SKMSDVKCTSVVLLSVLQQLRVESSSXXXXXXXXXHNDILLAKDTTEAFEKMVSLLSILLSMQGAVDINKLCEEMLDNRATLQ
QPN03732.1:3860-3942 (2)	nsp7 [polyprotein=ORF1ab polyprotein] [organism=Severe acute respiratory syndrome coronavirus 2] [isolate=SARS-CoV-2/human/USA/WI-UW-2007/2020]	SKMSDVKCTSVVLLSVLQQLRVESSSKLWAQCVQLHNDILLAKDTTEAFXKMVSLLSVLLSMQGAVDINKFCEEMLDNRATLQ
UNA47246.1:3860-3942 (2)	nsp7 [polyprotein=ORF1ab polyprotein] [organism=Severe acute respiratory syndrome coronavirus 2] [isolate=SARS-CoV-2/human/BGD/NGRI-R1-NSTU-21/2020]	SKXXXVKCTSVVLLSVLQQLRVESSSKLWAQXXXXXXXXXXXXXXXXXXXXXXXXXXXXXXMQGAVDXXXXXEXMLDNRATLQ
QXR88903.1:3860-3942 (2)	nsp7 [polyprotein=ORF1ab polyprotein] [organism=Severe acute respiratory syndrome coronavirus 2] [isolate=SARS-CoV-2/human/USA/VSP3015/2021]	SKMSDVKCTSVVLLSVLQQLRVESSSKLWAQCVQLHNDIILAKDTTEAFEKMVSLLSVLLSKQGAVDINKLCEEMLDNRATLQ
QUG15845.1:3860-3942 (2)	nsp7 [polyprotein=ORF1ab polyprotein] [organism=Severe acute respiratory syndrome coronavirus 2] [isolate=SARS-CoV-2/human/USA/AZ-CDC-2-4195287/2021]	SKMSDVKCTSVVLLSVLQQLRVESSSKLWAQCVQLHNDILLAKDTTEAFXKMVSLLSVLLSMQGAVDINKLCEEILDNRATLQ
QPF52020.1:3860-3942 (2)	nsp7 [polyprotein=ORF1ab polyprotein] [organism=Severe acute respiratory syndrome coronavirus 2] [isolate=SARS-CoV-2/human/USA/CA-CZB-10959/2020]	SKMSDVKCTSVVLLSVLQQLRVESSSKLWXQCVQLHNDILLAKDTTEAFEKMVSLLSVLLSMQGAVDINKLCEEMLDNRATLQ
UPW62563.1:3857-3939 (2)	nsp7 [polyprotein=ORF1ab polyprotein] [organism=Severe acute respiratory syndrome coronavirus 2] [isolate=SARS-CoV-2/human/USA/OR-CDC-LC0591207/2022]	SKMSDVKCTSVVLLSVLQQFRVESSSKLWSQCVQLHNDILLAKDTTEAFEKMVSLLSVLLSMQGAVDINKLCEEMLDNRATLQ
QTJ81198.1:3860-3942 (2)	nsp7 [polyprotein=ORF1ab polyprotein] [organism=Severe acute respiratory syndrome coronavirus 2] [isolate=SARS-CoV-2/human/USA/CA-CDC-QDX23012766/2021]	XXXXXXXXXXXXXXXXLQQLRVESSSKLWAQCVQLHNDILLAKDTTEAFEKMVSLLSVLLSMQGAVDINKLCEEILDNRATLQ
QXK76401.1:3857-3939 (2)	nsp7 [polyprotein=ORF1ab polyprotein] [organism=Severe acute respiratory syndrome coronavirus 2] [isolate=SARS-CoV-2/human/USA/HI-CDC-QDX26075519/2021]	SKMSDVKCTSVLLLSVLQQLRVESSSKLWAQCVQLHNDILLAKDTTEAFEKMVSLLSVLLSMQGAVDINKLCEEMLDNRATLQ
QQV34346.1:3860-3942 (2)	nsp7 [polyprotein=ORF1ab polyprotein] [organism=Severe acute respiratory syndrome coronavirus 2] [isolate=SARS-CoV-2/human/USA/OH-CDC-2-3714454/2020]	SKMSDVKCTSVVLLSVLQQLXVESSSKLWAQCVQLHNDILLAKDTTEAFEKMVSLLSVLLSMQGAVDINKLCEEMLDNRATLQ
QQP43819.1:3860-3942 (2)	nsp7 [polyprotein=ORF1ab polyprotein] [organism=Severe acute respiratory syndrome coronavirus 2] [isolate=SARS-CoV-2/human/USA/CA-CZB-10073/2020]	SKMSDVKCTSVVLLSVXQQLRVESSSKLWAQCVQLHNDILLAKDTTEAFEKMVSLLSVLLSMQGAVDINKLCXEMLDNRATLQ
QUR38468.1:3857-3939 (2)	nsp7 [polyprotein=ORF1ab polyprotein] [organism=Severe acute respiratory syndrome coronavirus 2] [isolate=SARS-CoV-2/human/USA/WV-CDC-QDX23997631/2021]	SKMSDVKCTSVVLLSVLQLLRVESSSKLWAQCVQLHNDILLAKDTTEAFEKMVSLLSVLLSMQGAVDINKLCEEMLDNRATLQ
QIU81823.1:3860-3942 (2)	nsp7 [polyprotein=ORF1ab polyprotein] [organism=Severe acute respiratory syndrome coronavirus 2] [isolate=SARS-CoV-2/human/CHN/Beijing_IME-BJ01/2020]	SKMSDVKCTSVVLLSVLQQLRVESSSKLWAQYVQLHNDILLAKDTTEAFEKMVSLLSVLLSMQGAVDINKLCEEMLDNRATLQ
QTZ40841.1:3860-3942 (2)	nsp7 [polyprotein=ORF1ab polyprotein] [organism=Severe acute respiratory syndrome coronavirus 2] [isolate=SARS-CoV-2/human/USA/CA-CDPH-UC1240/2020]	SKMSDVKCTSVVLLSVLQQLRVESSSKLWAQCVQLHNDILLAKDTTEAFEKMVSLLSVLLSMQGAVDIXXXXXXXXXXXXXXQ
UHI64646.1:3860-3942 (2)	nsp7 [polyprotein=ORF1ab polyprotein] [organism=Severe acute respiratory syndrome coronavirus 2] [isolate=SARS-CoV-2/human/USA/MI-CDC-ASC210452500/2021]	SKMSDVKCTSVVLLSVLQQLRVESSSKLWAQCVQLHNDILLAKDTTEAFEKMVSLLSVLLSMQGAVDINKLCEXMLDNRXXXX
UIS03721.1:3856-3938 (2)	nsp7 [polyprotein=ORF1ab polyprotein] [organism=Severe acute respiratory syndrome coronavirus 2] [isolate=SARS-CoV-2/human/USA/IL-CDC-STM-392AGRFBB/2021]	SKMADVKCTSVVLLSVLQQLRVESSSKLWAQCVQLHNDILLAKDTTEAFEKMVSLLSVLLSMQGAVDINKLCEEMLDNRATLQ
UHK53371.1:3860-3942 (2)	nsp7 [polyprotein=ORF1ab polyprotein] [organism=Severe acute respiratory syndrome coronavirus 2] [isolate=SARS-CoV-2/human/USA/OR-CDC-ASC210518288/2021]	SKMXDVKCTSXXXXXXXQQLRXXXSSKLWXXCVQLHNDILLAKDTTEAFEKMVSLLSVLLSMQGAVDINKLCEEMLDNRATLQ
QWM33389.1:3857-3939 (2)	nsp7 [polyprotein=ORF1ab polyprotein] [organism=Severe acute respiratory syndrome coronavirus 2] [isolate=SARS-CoV-2/human/USA/UT-UPHL-210603548608/2021]	XXXXXXXCXXVVLLSVLQQLRVESSSKLWAQCVQLHNDILLAKDTTEAFEKMVSLLSVLLSMQGAVDINKLCEEMLDNRATLQ
UKH83957.1:3856-3938 (2)	nsp7 [polyprotein=ORF1ab polyprotein] [organism=Severe acute respiratory syndrome coronavirus 2] [isolate=SARS-CoV-2/human/USA/IN-CDC-STM-BEF9MV65K/2022]	SKMSDVKCTSVVLLSVLQQLRVGSSSKLWAQCVQLHNDILLAKDTTEAFEKMVSLLSVLLSMQGAVDINKLCEEMLDNRATLQ
QKU32427.1:3860-3942 (2)	nsp7 [polyprotein=ORF1ab polyprotein] [organism=Severe acute respiratory syndrome coronavirus 2] [isolate=SARS-CoV-2/human/USA/CA-CZB-1525/2020]	SKMSDVKCTSVVLLSVFQQLGVESSSKLWAQCVQLHNDILLAKDTTEAFEKMVSLLSVLLSMQGAVDINKLCEEMLDNRATLQ
QUQ18245.1:3857-3939 (2)	nsp7 [polyprotein=ORF1ab polyprotein] [organism=Severe acute respiratory syndrome coronavirus 2] [isolate=SARS-CoV-2/human/USA/MD-CDC-ASC210049690/2021]	SKMSDVKCTSVVLLTVLQQLRVESSSKLWAQCVQLHNDILLAKDTTEAFEKMVSLLSVLLSMQGAVDINKLCEEMLDNRATLQ
UIQ65647.1:3856-3938 (2)	nsp7 [polyprotein=ORF1ab polyprotein] [organism=Severe acute respiratory syndrome coronavirus 2] [isolate=SARS-CoV-2/human/USA/DE-CDC-LC0454005/2021]	STMSDVKCTSVVLLSVLQQLRVESSSKLWAQCVQLHNDILLAKDTTEAFEKMVSLLSVLLSMQGAVDINKLCEEMLDNRATLQ
UHT91622.1:3860-3942 (2)	nsp7 [polyprotein=ORF1ab polyprotein] [organism=Severe acute respiratory syndrome coronavirus 2] [isolate=SARS-CoV-2/human/USA/MN-CDC-IBX587310050274/2021]	XKMSDVXXXSVVLLSVLQQLRVESSSKLWAQCVQLHNDILLAKDTTEAFEKMVSLLSVLLSMQGAVDINKLCEEMLDNRATLQ
QMT53743.1:3860-3942 (2)	nsp7 [polyprotein=ORF1ab polyprotein] [organism=Severe acute respiratory syndrome coronavirus 2] [isolate=SARS-CoV-2/human/USA/WA-S2629/2020]	SEMSDVKCTSVVLLSVLQQLRVESSSKLWAQCVQLHNDILLAKDTTEAFEKMVSLLSVLLSMQGAVDINKLCEEMLDNRATLQ
ULL38041.1:3860-3942 (2)	nsp7 [polyprotein=ORF1ab polyprotein] [organism=Severe acute respiratory syndrome coronavirus 2] [isolate=SARS-CoV-2/human/SouthAfrica/NHLS-UCT-GS-H681/2021]	SKMSDIKCTSVVLLSVLQQLRVESSSKLWAQCVQLHNDILLAKDTTEAFEKMVSLLSVLLSMQGAVDINKLCEEMLNNRATLQ
UMA97913.1:3856-3938 (2)	nsp7 [polyprotein=ORF1ab polyprotein] [organism=Severe acute respiratory syndrome coronavirus 2] [isolate=SARS-CoV-2/human/USA/NJ-CDC-ASC210818774/2022]	SKMSDVKCTSVVLLSVLQQLRVESSSKLWAQCVQSHNDILLAKDTTEAFEKMVSLLSVLLSMQGAVDINKLCEEMLDNRATLQ
UJO96139.1:3856-3938 (2)	nsp7 [polyprotein=ORF1ab polyprotein] [organism=Severe acute respiratory syndrome coronavirus 2] [isolate=SARS-CoV-2/human/USA/TN-CDC-ASC210595570/2022]	SKMSDVKCTSVALLSVLQQLRVESSSKLWAQCVQLHNDILFSKYSTEAFEKMVSLLSVLLSMQGAVDINKLCEEMLDNRATLQ
UGS95229.1:3860-3942 (2)	nsp7 [polyprotein=ORF1ab polyprotein] [organism=Severe acute respiratory syndrome coronavirus 2] [isolate=SARS-CoV-2/human/USA/CO-CDC-MMB11554512/2021]	SKMSDVKCTSVVLLSVLQQLRVESSSXXXXXXXXXXXDILLAKDTTEAFEKMVSLLSVLLSMQGAVDINKLCEEMLDSRATLQ
QTE15712.1:3860-3942 (2)	nsp7 [polyprotein=ORF1ab polyprotein] [organism=Severe acute respiratory syndrome coronavirus 2] [isolate=SARS-CoV-2/human/USA/MI-CDC-QDX22722003/2021]	SKMSDVKCTSVVLLSVLQQLRVESLSKLWAQCVQLHNDILLAKDTTEAFEKMVSLLSVLLSMQGAVDINRLCEEMLDNRATLQ
UPE98493.1:3860-3942 (2)	nsp7 [polyprotein=ORF1ab polyprotein] [organism=Severe acute respiratory syndrome coronavirus 2] [isolate=SARS-CoV-2/human/FRA/IHUCOVID-001549/2020]	SKISDVKCTSVXXXXXXXXXXXXXXXXXXXXXXXXXXXXLLAKDTTEAFEKMVSLLSVLLSMQGAVDINKLCEEMLDNRATLQ
UOL19701.1:3856-3938 (2)	nsp7 [polyprotein=ORF1ab polyprotein] [organism=Severe acute respiratory syndrome coronavirus 2] [isolate=SARS-CoV-2/human/USA/UT-UPHL-220326415316/2022]	SKMSDVKCTSVVLLSVLQQLRVESSSKWWAQCVQLHNDILLAKDTTEAFEKMVSLLSVLLSMQGAVDINKLCEEMLDNRATLQ
QXD92177.1:3857-3939 (2)	nsp7 [polyprotein=ORF1ab polyprotein] [organism=Severe acute respiratory syndrome coronavirus 2] [isolate=SARS-CoV-2/human/USA/UT-UPHL-210612000616/2021]	XXXXXXXXTSVVLLSVLQQLRVESSSKLWAQCVQLHNDILLAKDTTEAFEKMVSLLSVLLSMQGAVDINKLCEEMLDNRATLQ
QSW54287.1:3860-3942 (2)	nsp7 [polyprotein=ORF1ab polyprotein] [organism=Severe acute respiratory syndrome coronavirus 2] [isolate=SARS-CoV-2/human/USA/CA-CZB-24636/2021]	XXXXXXXXXXVVLLSVLQQLRVESSSKLWAQCIQLHNDILLAKDTTEAFEKMVSLLSVLLSMQGAVDINKLCEEMLDNRATLQ
UMQ83064.1:3856-3938 (2)	nsp7 [polyprotein=ORF1ab polyprotein] [organism=Severe acute respiratory syndrome coronavirus 2] [isolate=SARS-CoV-2/human/USA/TN-VUMC-O-2451/2021]	SKMSDVKCTSVVLLSVLQQLRVESSSKLWAQCVQLHNDILLAKDTTEAFEKMVSLLSVLLSMQGAVDINKLCEEMXXXXATLQ
QRN70212.1:3860-3942 (2)	nsp7 [polyprotein=ORF1ab polyprotein] [organism=Severe acute respiratory syndrome coronavirus 2] [isolate=SARS-CoV-2/human/USA/NC-CDC-STM-000008176/2021]	SKMSDVKCTSVVLLSVLQQLRVESSSKLWAQCVQLHNDILLAKDTAEAFEKMVSLLSVLLSMQGAVDINNLCEEMLDNRATLQ
UHA30198.1:3860-3942 (2)	nsp7 [polyprotein=ORF1ab polyprotein] [organism=Severe acute respiratory syndrome coronavirus 2] [isolate=SARS-CoV-2/human/USA/CO-CDC-ASC210402801/2021]	SKMSDXKCTSXXXLSVLQQLRVESSSKLWAQCVQLHNDILLAKDTTEAFEKMVSLLSVLLSMQGAVDINKLCEEMLDNRATLQ
UHQ33719.1:3860-3942 (2)	nsp7 [polyprotein=ORF1ab polyprotein] [organism=Severe acute respiratory syndrome coronavirus 2] [isolate=SARS-CoV-2/human/USA/CO-CDC-MMB11859349/2021]	SKMSDVKCTSVVLLSVLQQLRVESSXXXXXXXXXXHNDILLAKDTTEAFEKMVSLLSVLLSMQGAVDINKLCEEMLDSRATLQ
UKU70112.1:3856-3938 (2)	nsp7 [polyprotein=ORF1ab polyprotein] [organism=Severe acute respiratory syndrome coronavirus 2] [isolate=SARS-CoV-2/human/USA/KY-CDC-MMB13821004/2022]	SKMSDVKCTSVVLLSVLQQLRVESSSKLWAQCVQLHNDILLAKDTTEAFEKMVSLVSVLLSMQGAVDINKLCEEMLDNRATLQ
QTP76990.1:3860-3942 (2)	nsp7 [polyprotein=ORF1ab polyprotein] [organism=Severe acute respiratory syndrome coronavirus 2] [isolate=SARS-CoV-2/human/USA/IL-CDC-4051287-001/2021]	SKMSDVKCTSVVLLSVLQQLRVESSSKLWAQCVHLHNDILLSKDTTEAFEKMVSLLSVLLSMQGAVDINKLCEEMLDNRATLQ
QTC78929.1:3860-3942 (2)	nsp7 [polyprotein=ORF1ab polyprotein] [organism=Severe acute respiratory syndrome coronavirus 2] [isolate=SARS-CoV-2/human/USA/AZ-CDC-STM-000020477/2021]	SKMSDVKCTSVVLLSVLQQLRVESSSKLWAQCVQLHSDILLAKDTTEAFEKMVSLLSVLLSMQGAVDINKLCEEMLDNRATLQ
QJR89395.1:3860-3942 (2)	nsp7 [polyprotein=ORF1ab polyprotein] [organism=Severe acute respiratory syndrome coronavirus 2] [isolate=SARS-CoV-2/human/AUS/VIC395/2020]	SKMSDVKCTSVVLLSVLQQLRVESLSKLWAQCVQLHNDILLAKDTTEAFEKMVSLLSVLLSMQGAVXINKLCEEMLDNRATLQ
UFR31362.1:3860-3942 (2)	nsp7 [polyprotein=ORF1ab polyprotein] [organism=Severe acute respiratory syndrome coronavirus 2] [isolate=SARS-CoV-2/human/USA/AZ-CDC-QDX31175906/2021]	SKMSDVKCTSVVLLSVLQQLRVESSSKLWAQCVQLHNDILLAKDTNEAFEKMVSLLSVLLSMQGAVDINKLCEEMLDNRATLQ
QXP15531.1:3860-3942 (2)	nsp7 [polyprotein=ORF1ab polyprotein] [organism=Severe acute respiratory syndrome coronavirus 2] [isolate=SARS-CoV-2/human/USA/IL-19191167/2021]	SKMSDVKCTSVVLLSVLQQLRVESSSKLWAQCVQLHNDILFAKDTTEAFEKMVSLLSVLLSMQGAVDINKLCEEMLDNRATLQ
UHV80625.1:3860-3942 (2)	nsp7 [polyprotein=ORF1ab polyprotein] [organism=Severe acute respiratory syndrome coronavirus 2] [isolate=SARS-CoV-2/human/USA/TX-CDC-ASC210627590/2021]	SKMSDVKCTSVVLLSVLQQLRVESSSKLWAQCVQLHNDILLAKDTTEAFEKMVSLLSVLLSMQGAVXINKLXXXXXXXXXXXX
UIK25890.1:3860-3942 (2)	nsp7 [polyprotein=ORF1ab polyprotein] [organism=Severe acute respiratory syndrome coronavirus 2] [isolate=SARS-CoV-2/human/USA/MD-CDC-MMB12054171/2021]	SKMSDVKCTSVVLLSVLQQLRVESSSKLWAQCVQLHNDILLAKDTTEAFEKMVSXXXXXXXXXXXXXXXKLCEEMLDNRATLQ
UPS34686.1:3857-3939 (2)	nsp7 [polyprotein=ORF1ab polyprotein] [organism=Severe acute respiratory syndrome coronavirus 2] [isolate=SARS-CoV-2/human/USA/CO-CDC-MMB15062023/2022]	SKMSDVKCTSVVLLSVLQQLRVESSSXXWAQXXXXXXDILLAKDTTEAFEKMVSLLSVLLSMQGAVDINKLCEEMLDNRATLQ
UFY50621.1:3860-3942 (2)	nsp7 [polyprotein=ORF1ab polyprotein] [organism=Severe acute respiratory syndrome coronavirus 2] [isolate=SARS-CoV-2/human/USA/NJ-CDC-ASC210480175/2021]	SKMSDVKCTSVVLLSVLQQLRVESSSKLWAQCVQLHNDILLAKDTTEAFEKMVSLLSVLLSMQGAVXXXXXXXXMLDNRXTLQ
UMR53331.1:3856-3938 (2)	nsp7 [polyprotein=ORF1ab polyprotein] [organism=Severe acute respiratory syndrome coronavirus 2] [isolate=SARS-CoV-2/human/USA/CA-CDC-FG-285791/2022]	SKMSDVKCTSVVLLSVLQQLRVESSSKLWAQCVQLHNDIVLAKDTTEAFEKMVSLLSVLLSMQGAVDINKLCEEMLDNRATLQ
UJO37299.1:3856-3938 (2)	nsp7 [polyprotein=ORF1ab polyprotein] [organism=Severe acute respiratory syndrome coronavirus 2] [isolate=SARS-CoV-2/human/USA/NJ-CDC-ASC210565308/2022]	SKMSDVKCTSVVLLSVLQQLRVESSSKLWAQCVQLHNDILLAKDTTEAFEKMVSLLSVLLSMQGAVDINKLCEEMLDNRXXXQ
QOY99793.1:3860-3942 (2)	nsp7 [polyprotein=ORF1ab polyprotein] [organism=Severe acute respiratory syndrome coronavirus 2] [isolate=SARS-CoV-2/human/USA/NMDOH-2020309735/2020]	SKMSDVKCTSVVLLSVLQQLRVESSSKLWAQCVQLHNDILLAKDTTEAFEKMVSLLAVLLSMQGAVDINKLCEEMLDNRATLQ
QQV31705.1:3860-3942 (2)	nsp7 [polyprotein=ORF1ab polyprotein] [organism=Severe acute respiratory syndrome coronavirus 2] [isolate=SARS-CoV-2/human/USA/MA-QDX-3001/2021]	XXXXXXXXXXXXXXXXLQQLRVESSSKLWAQCVQLHNDILLAKDTTEAFEKMVSLLSVLLSMQGAVDINKFCEEMLDNRATLQ
UIO20571.1:3857-3939 (2)	nsp7 [polyprotein=ORF1ab polyprotein] [organism=Severe acute respiratory syndrome coronavirus 2] [isolate=SARS-CoV-2/human/USA/TN-CDC-ASC210639482/2021]	SKMSDVKCTSVVLLSVLQQLRVESSSKFWAQCVQLHNDILLAKDTTEAFEKMVSLLSVLLSMQGAVDINKLCEEMLDNRATLQ
QQN03954.1:3860-3942 (2)	nsp7 [polyprotein=ORF1ab polyprotein] [organism=Severe acute respiratory syndrome coronavirus 2] [isolate=SARS-CoV-2/human/USA/MA-MGH-03452/2020]	SKMSDVKCTSVVLLSVLQQLRVESSFKLWAQCVQLHNDILLAKDTTEAFEKMVSLLSVLLSMQGAVDINKFCEEMLDNRATLQ
QWW30970.1:3857-3939 (2)	nsp7 [polyprotein=ORF1ab polyprotein] [organism=Severe acute respiratory syndrome coronavirus 2] [isolate=SARS-CoV-2/human/USA/DC-CDC-2-4462107/2021]	SKMSDVKCTSVVLLSVLQQLRVESSSKLWAQCVQLHNDILLAKDTTEAFEKMVSXLSVLLSMQGAVDINKLCEEMLDNRATLQ
UHA14821.1:3860-3942 (2)	nsp7 [polyprotein=ORF1ab polyprotein] [organism=Severe acute respiratory syndrome coronavirus 2] [isolate=SARS-CoV-2/human/USA/VA-CDC-ASC210459720/2021]	SKMSDVKCTSVVLLSVLQQLRVESSSKLWAQCVQLHNDILLAKDTTEAFEKMVSLLSVLLSMQGAVDXNKLCEEMLDNRATXX
UHI32642.1:3860-3942 (2)	nsp7 [polyprotein=ORF1ab polyprotein] [organism=Severe acute respiratory syndrome coronavirus 2] [isolate=SARS-CoV-2/human/USA/MI-CDC-ASC210390773/2021]	SKMSDVKCTSVVLHSVLQQLRVESSSKLWAQCVQLHNDILLAKDTTEAFEKMVSLLSVLLSMQGAVDINKLCEEMLDNRATLQ
QTV33184.1:3858-3940 (2)	nsp7 [polyprotein=ORF1ab polyprotein] [organism=Severe acute respiratory syndrome coronavirus 2] [isolate=SARS-CoV-2/human/USA/JFRR/2020]	SKMPDVKCTSVVLLSVLQQLRVESSSKLWAQCVQLHNDILLAKDTTEAFEKMVSLLSVLLSMQGAVDINKLCEEMLDNRATLQ
QZJ86581.1:3860-3942 (2)	nsp7 [polyprotein=ORF1ab polyprotein] [organism=Severe acute respiratory syndrome coronavirus 2] [isolate=SARS-CoV-2/human/USA/TG745668/2020]	SKMSDVKCTSVVLLSVLQQLRVESSSKLWAQCVQLHNDILLAKDTTKAFEKMVSLLSVLLSMQGAVDINKLCEEMLDNRATLQ
QQO76266.1:3860-3942 (2)	nsp7 [polyprotein=ORF1ab polyprotein] [organism=Severe acute respiratory syndrome coronavirus 2] [isolate=SARS-CoV-2/human/EGY/EGY_CCHE57357_A_58/2020]	SKMSDVKCTSVVLLSVLQQLRVESSSKLWAQCVQLHNDILLAKDTTEAFEKMVSLLSVLLSMQGAVDINKLCEEMPDNRATLQ
UQU26162.1:3857-3939 (2)	nsp7 [polyprotein=ORF1ab polyprotein] [organism=Severe acute respiratory syndrome coronavirus 2] [isolate=SARS-CoV-2/human/USA/VA-CDC-LC0615326/2022]	SKMSDVKCTSVVLLSVLQQLRVESSSKLWAQCVQLHNDILLAKDTTEAFEKMVSLLFVLLSMRGAVDINKLCEEMLDNRATLQ
UID86923.1:3860-3942 (2)	nsp7 [polyprotein=ORF1ab polyprotein] [organism=Severe acute respiratory syndrome coronavirus 2] [isolate=SARS-CoV-2/human/USA/ME-CDC-ASC210641275/2021]	SKMSDXXXXXXXXLSVLQQLRVESSSKLXXQCVQLHNDILLAKDTTEAFEKMVSLLSVLLSMQGAVDINKLCEEMLDNRATLQ
QQX22589.1:3860-3942 (2)	nsp7 [polyprotein=ORF1ab polyprotein] [organism=Severe acute respiratory syndrome coronavirus 2] [isolate=SARS-CoV-2/human/USA/NV-QDX-3267/2020]	XXXXXXXCTSVVLLSVLQQLRVESSSKLWAQCIQLHNDILLAKDTTEAFEKMVSLLSVLLSMQGAVDINKLCEEMLDNRATLQ
ULV58947.1:3856-3938 (2)	nsp7 [polyprotein=ORF1ab polyprotein] [organism=Severe acute respiratory syndrome coronavirus 2] [isolate=SARS-CoV-2/human/USA/NC-CDC-MMB14253008/2022]	SKMSDVKCTSVVLLSVLQQLRVXSSXXXXXXXXXXHNDILLAKDTTEAFEKMVSLLSVLLSMQGAVDINKLCEEMLDNRATLQ
UIN97120.1:3856-3938 (2)	nsp7 [polyprotein=ORF1ab polyprotein] [organism=Severe acute respiratory syndrome coronavirus 2] [isolate=SARS-CoV-2/human/USA/NJ-CDC-ASC210641592/2021]	SKMSDVKCTSVVLLSVLQQLRVESSSKLWAQCVQLHNDILLAKDTTEAFEKMVSLLSVLLSMQGLLDINKLCEEMLDNRATLQ
UMQ80262.1:3860-3942 (2)	nsp7 [polyprotein=ORF1ab polyprotein] [organism=Severe acute respiratory syndrome coronavirus 2] [isolate=SARS-CoV-2/human/USA/TN-VUMC-O-0031/2021]	SKMSDVKCTSVVLLSVLQQLRVESSSKLXXQCVQLHNDILLAKDTTEAFEKMVSLLSVLLSMQGAVDINKLCEEMXXXXXXLQ
QTV37251.1:3860-3942 (2)	nsp7 [polyprotein=ORF1ab polyprotein] [organism=Severe acute respiratory syndrome coronavirus 2] [isolate=SARS-CoV-2/human/USA/JGHQ/2020]	SKMSDVKCTSVVLLSVLQQLRVESLSKLWAQCVQLHNDILLAKDTTEAFEKMVSLLSVLLSMQGAVDINKLCEEMLDNRSTLQ
UFV44640.1:3860-3942 (2)	nsp7 [polyprotein=ORF1ab polyprotein] [organism=Severe acute respiratory syndrome coronavirus 2] [isolate=SARS-CoV-2/human/USA/IA-CDC-ASC210480954/2021]	SKMXXXXXXXXXXLSVLQXXXVESSSKLWAQCVQLHNDILLAKDTTEAFEKMVSLLSVLLSMQGAVDINKLCEEMLDNRATLQ
QXL38428.1:3857-3939 (2)	nsp7 [polyprotein=ORF1ab polyprotein] [organism=Severe acute respiratory syndrome coronavirus 2] [isolate=SARS-CoV-2/human/USA/CO-CDC-QDX26257483/2021]	SKMSDVQCTSVVLLSVLQQLRVESSSKLWAQCVQLHNDILLAKDTTEAFEKMVSLLSVLLSMQGAVDINKLCEEMLDNRATLQ
UHQ68258.1:3860-3942 (2)	nsp7 [polyprotein=ORF1ab polyprotein] [organism=Severe acute respiratory syndrome coronavirus 2] [isolate=SARS-CoV-2/human/USA/NC-CDC-MMB11859330/2021]	SKMSDVKCTSVVLLSVLQQLRVESSSKLWAXCVQLHNDILLAKDTTEAFEKMVSLLSVLLSMQGAVDINKLCEEMLDSRATLQ
QVE30033.1:3857-3939 (2)	nsp7 [polyprotein=ORF1ab polyprotein] [organism=Severe acute respiratory syndrome coronavirus 2] [isolate=SARS-CoV-2/human/USA/MN-CDC-IBX857754622500/2021]	XXMSDVXXXSVVLLSVLQQLRVESSSKLWAQCVQLHNDILLAKDTTEAFEKMVSLLSVLLSMQGAVDINKLCEEMLDNRATLQ
QJT73032.1:3860-3942 (2)	nsp7 [polyprotein=ORF1ab polyprotein] [organism=Severe acute respiratory syndrome coronavirus 2] [isolate=SARS-CoV-2/human/France/40002VJ/2020]	SKMSDVKCTSVVLLSVLQQLRVESSSKLWAQCVQLHNDILLAKDTTEAFEKMVSLLSVLLSMQGAVDINKLCEEMLDNSATLQ
QVD85795.1:3857-3938 (2)	nsp7 [polyprotein=ORF1ab polyprotein] [organism=Severe acute respiratory syndrome coronavirus 2] [isolate=SARS-CoV-2/human/USA/FL-CDC-STM-000061570/2021]	SMSDVKCTSVVLLSVLQQLRVESSSKLWAQCVQLHNDILLAKDTTEAFEKMVSLLSVLLSMQGAVDINKLCEEMLDNRATLQ
ULS89683.1:3856-3938 (2)	nsp7 [polyprotein=ORF1ab polyprotein] [organism=Severe acute respiratory syndrome coronavirus 2] [isolate=SARS-CoV-2/human/USA/MD-CDC-MMB14085854/2022]	SKMSDVKCTSVVLLSVLQQLRVEXXXXXXXXXXXXHNDILLAKDTTEAFEKMVSLLSVLLSMQGAVDINKLCEEMLDNRATLQ
UHA06414.1:3860-3942 (2)	nsp7 [polyprotein=ORF1ab polyprotein] [organism=Severe acute respiratory syndrome coronavirus 2] [isolate=SARS-CoV-2/human/USA/OH-CDC-ASC210402374/2021]	SKMSDVXXTXVVLLSVLQQLRVESSSKLWAQCVQLHNDILLAKDTTEAFEKMVSLLSVLLSMQGAVDINKLCEEMLDNRATLQ
UHQ91482.1:3860-3942 (2)	nsp7 [polyprotein=ORF1ab polyprotein] [organism=Severe acute respiratory syndrome coronavirus 2] [isolate=SARS-CoV-2/human/USA/CO-CDC-MMB11833586/2021]	SKMSDVKCTSVVLLSVLQQLRVXXXXXXXXXXXXXXNDILLAKDTTEAFEKMVSLLSVLLSMQGAVDINKLCEEMLDNRATLQ
UKQ64631.1:3856-3938 (2)	nsp7 [polyprotein=ORF1ab polyprotein] [organism=Severe acute respiratory syndrome coronavirus 2] [isolate=SARS-CoV-2/human/USA/AR-CDC-LC0512400/2022]	SKMSDVKCTSVVLLSVLQQLRVESSSKLWAQCVQLHNDILLAKDTTEAFEKVVSLLSVLLSMQGAVDINKLCEEMLDNRATLQ
UDA77859.1:3860-3942 (2)	nsp7 [polyprotein=ORF1ab polyprotein] [organism=Severe acute respiratory syndrome coronavirus 2] [isolate=SARS-CoV-2/human/USA/SEARCH-9911/2020]	SKMSDVKCTSVVLLSVLQQLRVESSPKLWAQCVQLHNDILLAKDTTEAFEKMVSLLSVLLSMQGAVDINKLCEEMLDNRATLQ
UHX90945.1:3856-3938 (2)	nsp7 [polyprotein=ORF1ab polyprotein] [organism=Severe acute respiratory syndrome coronavirus 2] [isolate=SARS-CoV-2/human/USA/GA-CDC-MMB12222145/2021]	SKMSDVKCTSVVLLSVLQQLRVESSSKLWAQCVQLHNDILLAKDTTEAFEKMVSLLSVLXSMXGAVDINKLCEEMLDNRATLQ
QVI10155.1:3857-3939 (2)	nsp7 [polyprotein=ORF1ab polyprotein] [organism=Severe acute respiratory syndrome coronavirus 2] [isolate=SARS-CoV-2/human/USA/CA-CZB-30024/2021]	SKMSDVXCTSVVLLSVLQQLRVESSSKLWAQCVQLHNDILLAKDTTEAFEKMVSLLSVLLSMQGAVDINKLCEEMLDNRATLQ
QTU80851.1:3860-3942 (2)	nsp7 [polyprotein=ORF1ab polyprotein] [organism=Severe acute respiratory syndrome coronavirus 2] [isolate=SARS-CoV-2/human/USA/CA-CZB-27714/2021]	SKMSDVKCTXVVLLSVLQQLRVESSSKLWAQCVQLHNDILLAKDTTEAFEKMVSLLSVLLSMQGAVDINKLCEEMLDNRATLQ
UIO10210.1:3860-3942 (2)	nsp7 [polyprotein=ORF1ab polyprotein] [organism=Severe acute respiratory syndrome coronavirus 2] [isolate=SARS-CoV-2/human/USA/WI-CDC-ASC210557066/2021]	SKMSDVKCTSVVLLSVLQQLRVESSSKLWAQCLQLHNDILLAKDTTEAFEKMVSLLSVLLSMQGAVDINKLCEEMLDNRATLQ
QPN06082.1:3860-3942 (2)	nsp7 [polyprotein=ORF1ab polyprotein] [organism=Severe acute respiratory syndrome coronavirus 2] [isolate=SARS-CoV-2/human/USA/WI-UW-2212/2020]	SKMSXVKCTSVVLLSVLQQLRVESSSKLWAQCVQLHNDILLAKDTTEAFEKMVSLLSVLLSMQGAVDINKLCEEMLDNRATLQ
UJP24931.1:3856-3938 (2)	nsp7 [polyprotein=ORF1ab polyprotein] [organism=Severe acute respiratory syndrome coronavirus 2] [isolate=SARS-CoV-2/human/USA/FL-CDC-STM-GKHCQC4HX/2022]	SKMSDVKCTSVVLLSVLQQLRVESSSKLWAQCVQLHNDILLAKDTTEAFEKMVSLLSVLLSMQGAVDINKLYEEMLDNRATLQ
QWP90391.1:3857-3938 (2)	nsp7 [polyprotein=ORF1ab polyprotein] [organism=Severe acute respiratory syndrome coronavirus 2] [isolate=SARS-CoV-2/human/USA/UT-UPHL-210602640451/2021]	SXXXXXCTSVVLLSVLQQLRVESSSKLWAQCVQLHNDILLAKDTTEAFEKMVSLLSVLLSMQGAVDINKLCEEMLDNRATLQ
UIA23298.1:3860-3942 (2)	nsp7 [polyprotein=ORF1ab polyprotein] [organism=Severe acute respiratory syndrome coronavirus 2] [isolate=SARS-CoV-2/human/USA/VA-CDC-ASC210613904/2021]	SKMSDVKCTSVVLLSVLQQLRVESSSKLWAQCVQLHNDILLAKDTTEAFEKMVSLLSVLLSMQGXVXXXKLCEEMLDNRXXXX
UNW27485.1:3856-3938 (2)	nsp7 [polyprotein=ORF1ab polyprotein] [organism=Severe acute respiratory syndrome coronavirus 2] [isolate=SARS-CoV-2/human/USA/ME-Broad-CRSP_H4RBR7CS5FRLXEDS/2022]	XXXSDVKCTSVVLLSVLQQLRVESSSKLWAQCVQLHNDILLAKDTTEAFEKMVSLLSVLLSMQGAVDINKLCEEMLDNRATLQ
UKG37399.1:3856-3938 (2)	nsp7 [polyprotein=ORF1ab polyprotein] [organism=Severe acute respiratory syndrome coronavirus 2] [isolate=SARS-CoV-2/human/USA/CA-CDC-ASC210584526/2022]	SKMSDVKCTSVVLLSVLQQLRVESSSKLWAQCVQLTKKFFLAKDTTEAFEKMVSLLSVLLSMQGAVDINKLCEEMLDNRATLQ
UKQ20726.1:3856-3938 (2)	nsp7 [polyprotein=ORF1ab polyprotein] [organism=Severe acute respiratory syndrome coronavirus 2] [isolate=SARS-CoV-2/human/USA/NH-CDC-ASC210682881/2022]	SKMSDVKCTSVVLLSVLQQLRVESSSKLWAQCVQLHNDILLAKDTTEAFEKSVSLLSVLLSMQGAVDINKLCEEMLDNRATLQ
UPE94476.1:3860-3942 (2)	nsp7 [polyprotein=ORF1ab polyprotein] [organism=Severe acute respiratory syndrome coronavirus 2] [isolate=SARS-CoV-2/human/FRA/IHUCOVID-001721/2020]	SKMSDVKCTSVVLLSVLQQXRVESSSKLWAQCVQLHNDILLAKDTTEAFEKMVSLLSVLLSMQGAVDINKLCEEMLDNRATLQ
QVX68429.1:3857-3939 (2)	nsp7 [polyprotein=ORF1ab polyprotein] [organism=Severe acute respiratory syndrome coronavirus 2] [isolate=SARS-CoV-2/human/USA/MA-CDC-LC0061583/2021]	SKMSDVKCTSVVLLSVLLQLRVESSSKLWAQCVQLHNDILLAKDTTEAFEKMVSLLSVLLSMQGAVDINKLCEEMLDNRATLQ
UHU04542.1:3860-3942 (2)	nsp7 [polyprotein=ORF1ab polyprotein] [organism=Severe acute respiratory syndrome coronavirus 2] [isolate=SARS-CoV-2/human/USA/MI-MDHHS-SC37583/2021]	SKMSDXXXXSVVLLSVLQQLRVESSSKLWAQCVQLHNDILLAKDTTEAFEKMVSLLSVLLSMQGAVDINKLCEEMLDNRATLQ
QVG34018.1:3857-3939 (2)	nsp7 [polyprotein=ORF1ab polyprotein] [organism=Severe acute respiratory syndrome coronavirus 2] [isolate=SARS-CoV-2/human/USA/CO-CDC-ASC210029495/2021]	SKMSDVKCTSVVLLSVLQQLRVESSSKLWAQCVQLHNDILLAKDTTEAFEKMVSLLSVLLSMQGAVDINKPCEEMLDNRATLQ
UIN78288.1:3856-3938 (2)	nsp7 [polyprotein=ORF1ab polyprotein] [organism=Severe acute respiratory syndrome coronavirus 2] [isolate=SARS-CoV-2/human/USA/MI-CDC-STM-Y79HJY3JR/2021]	SKMSDVKCTSVVLLSVLQQLRVESSSKLWAQCVQLHNDILLAKDTTEAFEKMVSLLSVLLSMQGAVDINKLCXEMLDNRATLQ
UJW51509.1:3856-3938 (2)	nsp7 [polyprotein=ORF1ab polyprotein] [organism=Severe acute respiratory syndrome coronavirus 2] [isolate=SARS-CoV-2/human/USA/CA-CDC-FG-247018/2022]	SKMSDVKCTSVVLLSALQQLRVESSSKLWAQCVQLHNDILLAKDTTEAFEKMVSLLSVLLSMQGAVDINKLCEEMLDNRATLQ
UOA48033.1:3860-3942 (2)	nsp7 [polyprotein=ORF1ab polyprotein] [organism=Severe acute respiratory syndrome coronavirus 2] [isolate=SARS-CoV-2/human/USA/VA-VTVAS3-GSC28425/2021]	SKMSDVKCTSVVLLSVLQQLRVESSSKLWAQCVQLHNDILLATDTTEAFEKMVSLLSVLLSMQGAVDINKLCEEMLDNRATLQ
QZK38365.1:3857-3939 (2)	nsp7 [polyprotein=ORF1ab polyprotein] [organism=Severe acute respiratory syndrome coronavirus 2] [isolate=SARS-CoV-2/human/BHR/921312485/2021]	SKMSDVKCTSVVLLSVLQQLRVESSSKLWAQCVQLHNDILLAKDTPEAFEKMVSLLSVLLSMQGAVDINKLCEEMLDNRATLQ
QNR51122.1:3860-3942 (2)	nsp7 [polyprotein=ORF1ab polyprotein] [organism=Severe acute respiratory syndrome coronavirus 2] [isolate=SARS-CoV-2/human/USA/VA-DCLS-1113/2020]	SKMSDVKCTSVVLLSVLQQLRVESLSKLWVQCVQLHNDILLAKDTTEAFEKMVSLLSVLLSMQGAVDINKLCEEMLDNRATLQ
UPM68011.1:3860-3942 (2)	nsp7 [polyprotein=ORF1ab polyprotein] [organism=Severe acute respiratory syndrome coronavirus 2] [isolate=SARS-CoV-2/human/USA/CA-CDPH-2000006377/2020]	SKMSDVKCTSVVLLSVLQQLRVESSSKLWAQCCQLHNDILLAKDTTEAFEKMVSLLSVLLSMQGVVDINKLCEEMLDNRAXLQ
QSW44183.1:3860-3942 (2)	nsp7 [polyprotein=ORF1ab polyprotein] [organism=Severe acute respiratory syndrome coronavirus 2] [isolate=SARS-CoV-2/human/USA/CA-CZB-24589/2021]	SKXXXXXCTSVVLLSVLQQLRVESSSKLWAQCVQLHNDILLAKDTTEAFEKMVSLLSVLLSMQGAVDINKLCEEMLDNRATLQ
QXY52530.1:3857-3939 (2)	nsp7 [polyprotein=ORF1ab polyprotein] [organism=Severe acute respiratory syndrome coronavirus 2] [isolate=SARS-CoV-2/human/USA/NY-PRL-2021_0405_00O21/2021]	SKMSDVKCTSVVLLAVLQQLRVESSSKLWAQCVQLHNDILLAKDTTEAFEKMVLLLSVLLSMQGAVDINKLCEEMLDNRATLQ
UMQ81324.1:3860-3942 (2)	nsp7 [polyprotein=ORF1ab polyprotein] [organism=Severe acute respiratory syndrome coronavirus 2] [isolate=SARS-CoV-2/human/USA/TN-VUMC-O-2254/2021]	SKMSDVKCTSVVLLSVLQQLRVESSSKLWAQCVQLHNDILLAKDTTEAFEKMVSLLSVLLSMQGAVDINKLCEEMXXXXXTLQ
QXJ01158.1:3860-3942 (2)	nsp7 [polyprotein=truncated ORF1ab polyprotein] [organism=Severe acute respiratory syndrome coronavirus 2] [isolate=SARS-CoV-2/human/USA/VSP1684/2021]	SKMSDVKCTSVVLLSVLQQLRVESSSKLWAQCVQLHNDILSAKDTTEAFEKMVSLLSVLLSMRGAVDINKLCEEMLDNRATLQ
UIO12689.1:3860-3942 (2)	nsp7 [polyprotein=ORF1ab polyprotein] [organism=Severe acute respiratory syndrome coronavirus 2] [isolate=SARS-CoV-2/human/USA/PR-CDC-ASC210640311/2021]	SKMSDXXXXXXVXLSVLQQLRVESSSKLXXQCVQLHNDILLAKDTTEAFEKMVSLLSVLLSMQGAVDINKLCEEMLDNRATLQ
ULD68282.1:3856-3938 (2)	nsp7 [polyprotein=ORF1ab polyprotein] [organism=Severe acute respiratory syndrome coronavirus 2] [isolate=SARS-CoV-2/human/USA/VA-CDC-MMB13696779/2022]	SKMSDVKCTSVVLLSVLQQLRVXXXXXXXXXXVQLHNDILLAKDTTEAFEKMVSLLSVLLSMQGAVDINKLCEEMLDNRATLQ
UJM82117.1:3856-3938 (2)	nsp7 [polyprotein=ORF1ab polyprotein] [organism=Severe acute respiratory syndrome coronavirus 2] [isolate=SARS-CoV-2/human/USA/CA-CDC-ASC210562091/2021]	SKMSDVKCTSVVLLSVLQQLRRESSSKLWAQCVQLHNDILLAKDTTEAFEKMVSLLSVLLSMQGAVDINKLCEEMLDNRATLQ
UID44748.1:3857-3939 (2)	nsp7 [polyprotein=ORF1ab polyprotein] [organism=Severe acute respiratory syndrome coronavirus 2] [isolate=SARS-CoV-2/human/USA/CA-CDPH-D-2526984154/2021]	SKMSDVKCXXXXXXXXLQQLRVESSSKLWAQCVQLHNDILLAKDTTEAFEKMVSLLSVLLSMQGAVDINKLCEEMLDNRATLQ
QUN00160.1:3860-3942 (2)	nsp7 [polyprotein=ORF1ab polyprotein] [organism=Severe acute respiratory syndrome coronavirus 2] [isolate=SARS-CoV-2/human/USA/TX-DSHS-5949/2021]	SKMSDVKCTSVVLLXXLQQLRVESSSKLWAQCVQLHNDILLAKDTTEAFEKMVSLLSVLLSMQGAVDINKLCEEMLDNRATLQ
UHQ32824.1:3860-3942 (2)	nsp7 [polyprotein=ORF1ab polyprotein] [organism=Severe acute respiratory syndrome coronavirus 2] [isolate=SARS-CoV-2/human/USA/CO-CDC-MMB11857701/2021]	SKMSDVKCTSVVLLSVLQQLRVESSSKXXXXXXXXHNDILLAKDTTEAFEKMVSLLSVLLSMQGAVDINKLCEEMLDNRATLQ
UPH08859.1:3856-3938 (2)	nsp7 [polyprotein=ORF1ab polyprotein] [organism=Severe acute respiratory syndrome coronavirus 2] [isolate=SARS-CoV-2/human/USA/VA-CDC-QDX35574962/2022]	SKMSDVKCTSVXXXXXXXXXXXXXXXXXXXXXXXXXXDILLAKDTTEAFEKMVSLLSVLLSMQGAVDINKLCEEMLDNRATLQ
QXE96478.1:3857-3939 (2)	nsp7 [polyprotein=ORF1ab polyprotein] [organism=Severe acute respiratory syndrome coronavirus 2] [isolate=SARS-CoV-2/human/USA/UT-UPHL-210609973389/2021]	SKMXXXKCTSVVLLSVLQQLRVESSSKLWAQCVQLHNDILLAKDTTEAFEKMVSLLSVLLSMQGAVDINKLCEEMLDNRATLQ
QWB57339.1:3857-3939 (2)	nsp7 [polyprotein=ORF1ab polyprotein] [organism=Severe acute respiratory syndrome coronavirus 2] [isolate=SARS-CoV-2/human/USA/IL-CDC-QDX24758686/2021]	SKMSDVKCTSVVLLSVLQQLRVESSSKLWAQCVQLHNDILLAKDTTEAFEKMVSLLSVLVSMQGAVDINKLCEEMLDNRATLQ
UIE83530.1:3860-3942 (2)	nsp7 [polyprotein=ORF1ab polyprotein] [organism=Severe acute respiratory syndrome coronavirus 2] [isolate=SARS-CoV-2/human/USA/AR-ACRI-B011343/2021]	SKMSDVKCTSVVLLSVLQQLRVESSSKLWAQCVQLHNDILLAKDTTEAFEKMVSLLSVLLSMPGAVDINKLCEEMLDNRATLQ
UJT74931.1:3856-3938 (2)	nsp7 [polyprotein=ORF1ab polyprotein] [organism=Severe acute respiratory syndrome coronavirus 2] [isolate=SARS-CoV-2/human/USA/UT-UPHL-220115855759/2022]	SKMSDVKCTSVVLLSVLQQLRVESSSKLWAQCVQLHNDIPLAKDTTEAFEKMVSLLSVLLSMQGAVDINKLCEEMLDNRATLQ
QNC69427.1:3860-3942 (2)	nsp7 [polyprotein=ORF1ab polyprotein] [organism=Severe acute respiratory syndrome coronavirus 2] [isolate=SARS-CoV-2/human/USA/Navy-CDC-3539678-001/2020]	SKMSDVKCTSVVLLSVLQQLRVESSSKLWAQCVQLHNDILLAKDPTEAFEKMVSLLSVLLSMQGAVDINKLCEEMLDNRATLQ
ULV51970.1:3860-3942 (2)	nsp7 [polyprotein=ORF1ab polyprotein] [organism=Severe acute respiratory syndrome coronavirus 2] [isolate=SARS-CoV-2/human/IND/INSACOG-GBRC1402/2021]	SKMSDVKCTSVVLLSVLQQLRVESSSKLWAQCVQLHNDILLAKDTTEAFEKMVSLLSVLLSMQGAVDINKLCEEXXXXRATLQ
UGP38054.1:3860-3942 (2)	nsp7 [polyprotein=ORF1ab polyprotein] [organism=Severe acute respiratory syndrome coronavirus 2] [isolate=SARS-CoV-2/human/USA/MA-CDCBI-CRSP_K64NE43WUXPMVR6J/2021]	SKMSDVKCTSVVLLSVLQQLRVESSSXXWAQCVQLHNDILLAKDTTEAFEKMVSLLSVLLSXXGAVDINKLCEEMLDNRATLQ
QSM31747.1:3860-3942 (2)	nsp7 [polyprotein=ORF1ab polyprotein] [organism=Severe acute respiratory syndrome coronavirus 2] [isolate=SARS-CoV-2/human/USA/CA-CZB-19800/2020]	SKMSDVKCTSVVLLSVLQQLRVESSSKLWAQCVQXHNDILLAKDTTEAFEKMVSLLSVLLSMQGAVDINKLCEEMLDNRATLQ
UMF78587.1:3856-3938 (2)	nsp7 [polyprotein=ORF1ab polyprotein] [organism=Severe acute respiratory syndrome coronavirus 2] [isolate=SARS-CoV-2/human/USA/CO-CDC-FG-283653/2022]	SKMSDVKCTSVVLLSVLQQLRVESSSKMWAQCVQLHNDILLAKDTTEAFEKMVSLLSVLLSMQGAVDINKLCEEMLDNRATLQ
UHQ77206.1:3860-3942 (2)	nsp7 [polyprotein=ORF1ab polyprotein] [organism=Severe acute respiratory syndrome coronavirus 2] [isolate=SARS-CoV-2/human/USA/CO-CDC-MMB11813092/2021]	SKMSDVKCTSVVLLSVLQQLRVESSSKLWAQCIQLHNDILLAKDTTEAFEKMVSLLSVLLSMQGAVDINKLCEEMLDSRATLQ
UGO73962.1:3860-3942 (2)	nsp7 [polyprotein=ORF1ab polyprotein] [organism=Severe acute respiratory syndrome coronavirus 2] [isolate=SARS-CoV-2/human/USA/CO-CDC-MMB11567851/2021]	SKMSDVKCTSVVLLSVLQQLRVESSSKLWAQCVQLHNDILLAKDTTEAFEKMVSXXXVLLSMQGAVDINKLCEEMLDNRATLQ
QYM24485.1:3860-3942 (2)	nsp7 [polyprotein=ORF1ab polyprotein] [organism=Severe acute respiratory syndrome coronavirus 2] [isolate=SARS-CoV-2/human/USA/CA-CHLA-PLM11570730/2020]	SKMSDVKCTSVVLLSVLQQLRVESSSKLWAQCVQFHNDILLAKDTTEAFEKMVSLLSVLLSMQGAVDINKLCEEMLDNRATLQ
ULH75753.1:3860-3942 (2)	nsp7 [polyprotein=ORF1ab polyprotein] [organism=Severe acute respiratory syndrome coronavirus 2] [isolate=SARS-CoV-2/human/IND/INSACOG-GBRC1359/2020]	SKMSDVKCTSVVLLSVLQQLRVESSSKLWAQCVQLHNDILLAKDTTEAFEKMVSLLSVLLSMQGAVDINKLCEEMLDNXXXXQ
QQP46807.1:3860-3942 (2)	nsp7 [polyprotein=ORF1ab polyprotein] [organism=Severe acute respiratory syndrome coronavirus 2] [isolate=SARS-CoV-2/human/USA/CA-CZB-13107/2020]	SKMSXVKCTSVVLLSVLQQLRVESSSKLWAQCIQLHNDILLAKDTTEAFEKMVSLLSVLLSMQGAVDINKLCEEMLDNRATLQ
UFV77556.1:3860-3942 (2)	nsp7 [polyprotein=ORF1ab polyprotein] [organism=Severe acute respiratory syndrome coronavirus 2] [isolate=SARS-CoV-2/human/USA/NM-CDC-LC0390622/2021]	SKMSDVKCTSVVLLSVLQQLRVESSSKLWAQCVQLHNDILLAKDTTEAFEKMVSILSVLLSMQGAVDINKLCEEMLDNRATLQ
UHS82674.1:3856-3938 (2)	nsp7 [polyprotein=ORF1ab polyprotein] [organism=Severe acute respiratory syndrome coronavirus 2] [isolate=SARS-CoV-2/human/USA/CA-CDC-ASC210613926/2021]	SKMSDVKCTSVVLLSVLQQLRVESSSKLWAQCVQLHNDILLAKDTTEAFEKMVSLLSVLLSMQGAVDINKXXXXXXXXXATLQ
UJU89663.1:3860-3942 (2)	nsp7 [polyprotein=ORF1ab polyprotein] [organism=Severe acute respiratory syndrome coronavirus 2] [isolate=SARS-CoV-2/human/USA/CA-CDPH-3000292780/2021]	SKMSDVKCTSVILLSVLQQLRVESSSKLWAQCVQLHNDILLAKDTTEAFEKMVSLLSVLLSMQGAVDINKLCEEMLDNRAILQ
ULH87664.1:3856-3938 (2)	nsp7 [polyprotein=ORF1ab polyprotein] [organism=Severe acute respiratory syndrome coronavirus 2] [isolate=SARS-CoV-2/human/USA/NC-CDC-MMB14005524/2022]	SKMSDVKCTSVVLLSVLQQLRVESSSKLWAQCVQLHNDILLAKDTTEAFEKMVSLLSXLLSMXGAVDINKLCEEMLDNRATLQ
UPC27391.1:3860-3942 (2)	nsp7 [polyprotein=ORF1ab polyprotein] [organism=Severe acute respiratory syndrome coronavirus 2] [isolate=SARS-CoV-2/human/FRA/IHUCOVID-035232_Nova1/2020]	SKISDVKCTSVVLLSVLQQLRVESSSKLWAQCVQLHNDILLAKDTTEAFEKMVSLLSVLLSMQGAVDIXKLCEEMLDNRATLQ
UHC36280.1:3860-3942 (2)	nsp7 [polyprotein=ORF1ab polyprotein] [organism=Severe acute respiratory syndrome coronavirus 2] [isolate=SARS-CoV-2/human/USA/CO-CDC-MMB11722413/2021]	SKMSDVKCTSVVLLSVLQQLRVEXXXXXXXXXVQLHNDILLAKDTTEAFEKMVSLLSVLLSMQGAVDINKLCEEMLDSRATLQ
QXD96207.1:3857-3939 (2)	nsp7 [polyprotein=ORF1ab polyprotein] [organism=Severe acute respiratory syndrome coronavirus 2] [isolate=SARS-CoV-2/human/USA/UT-UPHL-210612564181/2021]	SXXXXXXXTXXVLLSVLQQLRVESSSKLWAQCVQLHNDILLAKDTTEAFEKMVSLLSVLLSMQGAVDINKLCEEMLDNRATLQ
QYK37877.1:3857-3939 (2)	nsp7 [polyprotein=ORF1ab polyprotein] [organism=Severe acute respiratory syndrome coronavirus 2] [isolate=SARS-CoV-2/human/USA/WUSTL_000267_A185/2021]	SKMSDVKCTSVVLLSVLQQLRVESSSKLWAQCVQLHNDILLAKDTTEAFEKMVSLLSVLLSMQGAVXINKXCEEMLDNRATLQ
UFQ79438.1:3860-3942 (2)	nsp7 [polyprotein=ORF1ab polyprotein] [organism=Severe acute respiratory syndrome coronavirus 2] [isolate=SARS-CoV-2/human/USA/CO-CDPHE-2102047722/2021]	SKMSDVKCTSVVLLSVLQQLRVESSSKLWAQCVXLHNDILLAKDTTEAFEKMVSLLSVLLSMQGAVDINKLCEEMLDNRATLQ
UGX66679.1:3860-3942 (2)	nsp7 [polyprotein=ORF1ab polyprotein] [organism=Severe acute respiratory syndrome coronavirus 2] [isolate=SARS-CoV-2/human/USA/MI-CDC-STM-2AQKVS3YQ/2021]	SKMSDVKCTSVVLLSVLQQLRVESSSKLWAQCVQLHNDILLAKDTTEAFEKMVSLLSVLLSMQGAVDIXKLCEEMLDXRATLQ
QSG72865.1:3860-3942 (2)	nsp7 [polyprotein=ORF1ab polyprotein] [organism=Severe acute respiratory syndrome coronavirus 2] [isolate=SARS-CoV-2/human/USA/PA-CDC-QDX22024623/2021]	XXXXXXXXXXXXXXXXLQQLRVESSSKLWAQCCQLHNDILLAKDTTEAFEKMVSLLSVLLSMQGVVDINKLCEEMLDNRAILQ
QVI04616.1:3860-3942 (2)	nsp7 [polyprotein=ORF1ab polyprotein] [organism=Severe acute respiratory syndrome coronavirus 2] [isolate=SARS-CoV-2/human/USA/CA-CDC-4097512-001/2020]	SKMSDVKCTSVVLLSVFQQLRVESSSKLWAQCVQLHNDILLAKDTTEAFEKMVSLLSVLLSMQGAXDINKLCEEMLDNRATLQ
QRN59212.1:3860-3942 (2)	nsp7 [polyprotein=ORF1ab polyprotein] [organism=Severe acute respiratory syndrome coronavirus 2] [isolate=SARS-CoV-2/human/USA/FHCRC-880/2020]	SKMSDVKCTSVVLLSVLQQLRVESSSKLWAQCVQLHNDILLAKDTTEAFEKMVSLLSVLLSMQGAVDINKLFEEMLDNRATLQ
UMQ81132.1:3856-3938 (2)	nsp7 [polyprotein=ORF1ab polyprotein] [organism=Severe acute respiratory syndrome coronavirus 2] [isolate=SARS-CoV-2/human/USA/TN-VUMC-O-2233/2021]	SKMSDVKCTSVVLLSVLQQLRVESSSXXXXXXVQLHNDILLAKDTTEAFEKMVSLLSVLLSMQGAVDINKLCEEMXDNRATLQ
UHG31268.1:3860-3942 (2)	nsp7 [polyprotein=ORF1ab polyprotein] [organism=Severe acute respiratory syndrome coronavirus 2] [isolate=SARS-CoV-2/human/USA/IN-CDC-STM-6ZWSAAMX5/2021]	SKMSDVKCTSVVLXSVLQQLRVESSSKLWAQCVQLHNDILLAKDTTEAFEKMVSLLSVLLSMQGAVDINKLCEEMLDNRATLQ
UPC20812.1:3860-3942 (2)	nsp7 [polyprotein=ORF1ab polyprotein] [organism=Severe acute respiratory syndrome coronavirus 2] [isolate=SARS-CoV-2/human/FRA/IHUCOVID-034004_Nova1/2021]	SKMSDVKCTSVVLLSVLQQLRVXSSSKLWAQCVQLHNDILLAKDTTEAFEKMVSLLSVLLSMQGAVDINKLCEEMLDNRATLQ
UFY62543.1:3860-3942 (2)	nsp7 [polyprotein=ORF1ab polyprotein] [organism=Severe acute respiratory syndrome coronavirus 2] [isolate=SARS-CoV-2/human/USA/MA-CDC-ASC210483926/2021]	XKMSDVXXXXXXXXXXXXXXXXESSSKXXXXCVQLHNDILLAKXXXXXFEKMXXLLSVLLSMQGXXXXNKLCXXXXXXXXXXX
QUM16025.1:3857-3939 (2)	nsp7 [polyprotein=ORF1ab polyprotein] [organism=Severe acute respiratory syndrome coronavirus 2] [isolate=SARS-CoV-2/human/USA/TX-CDC-IBX335740338323/2020]	XKMSDVXXTSVVLLSVLQQLRVESSSKLWAQCVQLHNDILLAKDTTEAFEKMVSLLSVLLSMQGAVDINKLCEEMLDNRATLQ
QVU45036.1:3857-3939 (2)	nsp7 [polyprotein=ORF1ab polyprotein] [organism=Severe acute respiratory syndrome coronavirus 2] [isolate=SARS-CoV-2/human/USA/AR-CDC-2-4369304/2021]	SKMSDVKCTSVVLLSVLQQLRVESSSKLWAQCVQLHNDILLAKDTTEAFEKMVSLLSVXLSMXGAVDINKLCEEMLDNRATLQ
QQA02916.1:3860-3942 (2)	nsp7 [polyprotein=ORF1ab polyprotein] [organism=Severe acute respiratory syndrome coronavirus 2] [isolate=SARS-CoV-2/human/USA/MD-MDH-0478/2020]	SKMSDXXXXSVVLLSVLQQLRVESLSKLWAQCVQLHNDILLAKDTTEAFEKMVSLLSVLLSMQGAVDINKLCEEMLDNRATLQ
UMW44133.1:3856-3938 (2)	nsp7 [polyprotein=ORF1ab polyprotein] [organism=Severe acute respiratory syndrome coronavirus 2] [isolate=SARS-CoV-2/human/USA/CO-CDC-MMB14214739/2022]	SKMSDVKCTSVVLLSVLQQLRVESSSKLWAQCVQLHNDILLAKDTTEAFEKXXXXXXXXXSMXGAVDINKLCEEMLDNRATLQ
QWE90819.1:3860-3942 (2)	nsp7 [polyprotein=ORF1ab polyprotein] [organism=Severe acute respiratory syndrome coronavirus 2] [isolate=SARS-CoV-2/human/USA/MAMC-00025/2021]	SKMSDVKCTSVVLLSVLQQLRVESSSKLWXXXXQLHNDILLAKDTTEAFEKMVSLLSVLLSMQGAVDINKLCEEMLDNRATLQ
UGK95150.1:3860-3942 (2)	nsp7 [polyprotein=ORF1ab polyprotein] [organism=Severe acute respiratory syndrome coronavirus 2] [isolate=SARS-CoV-2/human/USA/NY-CDC-FG-181631/2021]	SKMSDVKCTSVVLLSVLQQLRVESSSKLWAQCVQLHNDILLVKDTTEAFEKMVSLLSVLLSMQGAVDINKLCEELLDNRATLQ
UMQ80486.1:3860-3942 (2)	nsp7 [polyprotein=ORF1ab polyprotein] [organism=Severe acute respiratory syndrome coronavirus 2] [isolate=SARS-CoV-2/human/USA/TN-VUMC-O-0051/2021]	SKMSDVKCTSVVLLSVLQQLRVESSSKXXAQCVQLHNDILLAKDTTEAFEKMVSLLSVLLSMQGAVDINKLCEEMXXXXXXLQ
QXE94674.1:3857-3939 (2)	nsp7 [polyprotein=ORF1ab polyprotein] [organism=Severe acute respiratory syndrome coronavirus 2] [isolate=SARS-CoV-2/human/USA/UT-UPHL-210609426480/2021]	SKMSDXKCTSVVLLSVLQQLRVESSSKLWAQCVQLHNDILLAKDTTEAFEKMVSLLSVLLSMQGAVDINKLCEEMLDNRATLQ
UES66517.1:3860-3942 (2)	nsp7 [polyprotein=ORF1ab polyprotein] [organism=Severe acute respiratory syndrome coronavirus 2] [isolate=SARS-CoV-2/human/USA/NY-PV26429/2021]	SKMSDVKCTSVVLLSVLQQLRVESSSKLWAQCVQLHNDILLAKDTTEAFEKMVSLLSVLLSMQGAVDINKLCEEMVDNRATLQ
UJM82105.1:3856-3938 (2)	nsp7 [polyprotein=ORF1ab polyprotein] [organism=Severe acute respiratory syndrome coronavirus 2] [isolate=SARS-CoV-2/human/USA/CA-CDC-ASC210562090/2021]	SKMSDVKCTSVVLLSVLQQLRVESSSKLWAQCVQLHNDILLAKDTTEAFEKMVSLLFVLLSMQGAVDINKLCEEMLDKRAPLK
UMQ82034.1:3856-3938 (2)	nsp7 [polyprotein=ORF1ab polyprotein] [organism=Severe acute respiratory syndrome coronavirus 2] [isolate=SARS-CoV-2/human/USA/TN-VUMC-O-2332/2021]	SKMSDVKCTSVVLLSVLQQLRVESSSXXXXXXVQLHNDILLAKDTTEAFEKMVSLLSVLLSMQGAVDINKFCEEMXXXXXXLQ
QKV38759.1:3860-3942 (2)	nsp7 [polyprotein=ORF1ab polyprotein] [organism=Severe acute respiratory syndrome coronavirus 2] [isolate=SARS-CoV-2/human/USA/WA-S1116/2020]	SKMSDVKCTSVVLLSVLQQLRVESSSKLWAQCVQLHNDILLAKDTTEALEKMVSLLSVLLSMQGAVDINKLCEEMLDNRATLQ
UIS77024.1:3860-3942 (2)	nsp7 [polyprotein=ORF1ab polyprotein] [organism=Severe acute respiratory syndrome coronavirus 2] [isolate=SARS-CoV-2/human/USA/CA-CDPH-500026708/2021]	SKMSDVXXXXXXXXXXXXXXXXXXXXXXXXXXXXXHNDILLAKDTTXXFEKMVSLLSVLLSMQGAVDINKLCEEMLDNRATLQ
UQA13916.1:3859-3941 (2)	nsp7 [polyprotein=ORF1ab polyprotein] [organism=Severe acute respiratory syndrome coronavirus 2] [isolate=SARS-CoV-2/human/FRA/IHUCOVID-030131-Nova1E/2021]	SKMSDVKCTSVVLLSVLQQLRVESSSKLWAQCVQLHNDILLAKDTTEXFEKMVSLLSVLLSMQGAVDINKLCEEMLDNRATLQ
UFR86599.1:3857-3939 (2)	nsp7 [polyprotein=ORF1ab polyprotein] [organism=Severe acute respiratory syndrome coronavirus 2] [isolate=SARS-CoV-2/human/USA/MA-CDCBI-CRSP_AFFT4NELUND2BTU3/2021]	SKMSDVKCTSVVLLSVLQQLRVESSSKLWAQCVQLHNDILLAKDTTEAFEKMVSLLSVLLSMQGAVDINKLCEEMLDNRANLQ
UHX87829.1:3859-3941 (2)	nsp7 [polyprotein=ORF1ab polyprotein] [organism=Severe acute respiratory syndrome coronavirus 2] [isolate=SARS-CoV-2/human/USA/CO-CDC-MMB11972121/2021]	SKMSDVKCTSVVLLSVLQQLRVESSSKXXXXXXXXHNDILLAKDTTEAFEKMVSLLSVLLSMQGAVDINKLCEEMLDSRATLQ
QYG56102.1:3857-3939 (2)	nsp7 [polyprotein=ORF1ab polyprotein] [organism=Severe acute respiratory syndrome coronavirus 2] [isolate=SARS-CoV-2/human/USA/ALTCOV-4X6SNUAUFM4HPGDM/2021]	SKMSDVKCTSVVLLSVLQQLRVESSSKLWAQCVQLHNDILLAKDTTETFEKMVSLLSVLLSMQGAVDINKLCEEMLDNRATLQ
QSV23688.1:3860-3942 (2)	nsp7 [polyprotein=ORF1ab polyprotein] [organism=Severe acute respiratory syndrome coronavirus 2] [isolate=SARS-CoV-2/human/USA/TX-CDC-QDX22290553/2021]	SKMSDVKCTSVVLLLVLQQLRVESSSKLXXXXXXXXXXXXXXXXXXXXXXXXXXXLSVLLSMQGAVDINKLCEEMLDNRATLQ
UJM82321.1:3856-3938 (2)	nsp7 [polyprotein=ORF1ab polyprotein] [organism=Severe acute respiratory syndrome coronavirus 2] [isolate=SARS-CoV-2/human/USA/IA-CDC-ASC210562129/2021]	SKMSDVKCTSVVLLSVLQQLRVESSSKLWALCVDLHNDILLAKDTTEAFEKMVSLLSVLLSMQGAVDINKLCEEMLDNRATLQ
QWM34471.1:3857-3939 (2)	nsp7 [polyprotein=ORF1ab polyprotein] [organism=Severe acute respiratory syndrome coronavirus 2] [isolate=SARS-CoV-2/human/USA/UT-UPHL-210603954827/2021]	SKMSXXXCTSVXLLSVLQQLRVESSSKLWAQCVQLHNDILLAKDTTEAFEKMVSLLSVLLSMQGAVDINKLCEEMLDNRATLQ
QSW07467.1:3860-3942 (2)	nsp7 [polyprotein=ORF1ab polyprotein] [organism=Severe acute respiratory syndrome coronavirus 2] [isolate=SARS-CoV-2/human/IRN/Ir-3/2019]	SKMSDVKCTSVVLLSVLQQLRVESSSKLWAQCVQLHNDILLAKDTTEAFEKMVSLLSVLLSMQGAVDINKLCEKMLDNRATLQ

## Sheet: Nsp7 April 2023
Nsp7 sequences based on April 2023
Name	Description	Sequence
BDE32464.1:3860-3942 (6723544)	nsp7 [polyprotein=ORF1a polyprotein] [organism=Severe acute respiratory syndrome coronavirus 2] [isolate=hCoV-19/Japan/SZ-NIG-Y212029/2021]	SKMSDVKCTSVVLLSVLQQLRVESSSKLWAQCVQLHNDILLAKDTTEAFEKMVSLLSVLLSMQGAVDINKLCEEMLDNRATLQ
UIC17577.1:3831-3913 (10838)	nsp7 [polyprotein=ORF1ab polyprotein] [organism=Severe acute respiratory syndrome coronavirus 2] [isolate=SARS-CoV-2/human/USA/CO-CDPHE-2100843697/2021]	SKMSDVKCTSVVLLSVLQQLRVESSSKLWAQCVQLHNDILLAKDTTEAFEKMVSLLSVLLSMQGAVDINKLCEEMLNNRATLQ
UIT57064.1:3860-3942 (10473)	nsp7 [polyprotein=ORF1ab polyprotein] [organism=Severe acute respiratory syndrome coronavirus 2] [isolate=SARS-CoV-2/human/USA/CA-CDPH-3000018059/2021]	SKMSDVKCTSVVLLSVLQQLRVESSSKLWAQCVQLHNDILLAKDTTEAFEKMVSLLSVLLSMQGAVDINKFCEEMLDNRATLQ
UIS77523.1:3860-3942 (8991)	nsp7 [polyprotein=ORF1ab polyprotein] [organism=Severe acute respiratory syndrome coronavirus 2] [isolate=SARS-CoV-2/human/USA/CA-CDPH-500026765/2021]	XXXXXXXXXXXXXXXXXXXXXXXXXXXXXXXXXXXXXXXXXXXXXXXXXXXXXXXXXXXXXXXXXXXXXXXXXXXXXXXXXXX
UIZ65864.1:3723-3805 (8402)	nsp7 [polyprotein=ORF1ab polyprotein] [organism=Severe acute respiratory syndrome coronavirus 2] [isolate=SARS-CoV-2/human/USA/CO-CDPHE-2102510406/2021]	XXXXXXXXXXXXXXXXXXXXXXXXXXXXXXXXXXXXXXXXXAKDTTEAFEKMVSLLSVLLSMQGAVDINKLCEEMLDNRATLQ
UIO81124.1:3860-3942 (7043)	nsp7 [polyprotein=ORF1ab polyprotein] [organism=Severe acute respiratory syndrome coronavirus 2] [isolate=SARS-CoV-2/human/USA/CO-CDPHE-2007082648/2020]	SKMSDVKCTSVVLLSVLQQLRVESLSKLWAQCVQLHNDILLAKDTTEAFEKMVSLLSVLLSMQGAVDINKLCEEMLDNRATLQ
UID64493.1:3860-3942 (6888)	nsp7 [polyprotein=ORF1ab polyprotein] [organism=Severe acute respiratory syndrome coronavirus 2] [isolate=SARS-CoV-2/human/USA/CA-CDPH-3000123094/2021]	SKMSDVKCTSVVLLSVLQQLRVESSFKLWAQCVQLHNDILLAKDTTEAFEKMVSLLSVLLSMQGAVDINKLCEEMLDNRATLQ
WBG36409.1:3857-3939 (6833)	nsp7 [polyprotein=ORF1ab polyprotein] [organism=Severe acute respiratory syndrome coronavirus 2] [isolate=SARS-CoV-2/human/USA/CA-CDC-LC0971128/2022]	SKMSDVKCTSVVLLSVLQQLRVESSSKLWAQCVQLHNDILLAKDTTEAFEKMVSLLSVLLSMRGAVDINKLCEEMLDNRATLQ
UJR97807.1:3860-3942 (5124)	nsp7 [polyprotein=ORF1ab polyprotein] [organism=Severe acute respiratory syndrome coronavirus 2] [isolate=SARS-CoV-2/human/USA/UT-UPHL-220109532084/2021]	SKMSDVKCTSVVLLSVLQQLRVESSSKLWAQCVQLHNDILLAKDTTEAFEKMVSLLSVLLSMQGAVDINKLCEEILDNRATLQ
UIT26504.1:3860-3942 (4087)	nsp7 [polyprotein=ORF1ab polyprotein] [organism=Severe acute respiratory syndrome coronavirus 2] [isolate=SARS-CoV-2/human/USA/CA-CDPH-3000040495/2021]	SKMSDVKCTSVVLLSVLQQLRVESSSKLWAQCVQLHNDILLAKDTTEAFEKMVSLLSVLLSMQGAVDINKLCEEMLDNRAILQ
UJV17201.1:3860-3942 (4080)	nsp7 [polyprotein=ORF1a polyprotein] [organism=Severe acute respiratory syndrome coronavirus 2] [isolate=SARS-CoV-2/human/USA/CA-CDPH-3000051155/2021]	XXXXXXXXXXXXXXXXLQQLRVESSSKLWAQCVQLHNDILLAKDTTEAFEKMVSLLSVLLSMQGAVDINKLCEEMLDNRATLQ
WBU79821.1:3836-3918 (3474)	nsp7 [polyprotein=ORF1a polyprotein] [organism=Severe acute respiratory syndrome coronavirus 2] [isolate=SARS-CoV-2/human/PRI/PR-UPRRP-7020/2022]	XXXXXXXXXSVVLLSVLQQLRVESSSKLWAQCVQLHNDILLAKDTTEAFEKMVSLLSVLLSMQGAVDINKLCEEMLDNRATLQ
UBN97493.1:3860-3942 (3374)	nsp7 [polyprotein=ORF1ab polyprotein] [organism=Severe acute respiratory syndrome coronavirus 2] [isolate=SARS-CoV-2/human/USA/FL-CDC-ASC210008048/2021]	SKMSDVKCTSVVLLSVLQQLRVESSSKLWAQCVQLHNDVLLAKDTTEAFEKMVSLLSVLLSMQGAVDINKLCEEMLDNRATLQ
URK58365.1:3857-3939 (3299)	nsp7 [polyprotein=ORF1ab polyprotein] [organism=Severe acute respiratory syndrome coronavirus 2] [isolate=SARS-CoV-2/human/USA/FL-CDC-STM-UEQBW2CHG/2022]	SKMSDVKCTSVVLLSVLQQLRVESSSKLWAQCVQLHNDILLAKDTTEAFEKMVSLLSVLFSMQGAVDINKLCEEMLDNRATLQ
UBO30549.1:3860-3942 (3106)	nsp7 [polyprotein=ORF1ab polyprotein] [organism=Severe acute respiratory syndrome coronavirus 2] [isolate=SARS-CoV-2/human/USA/OR-CDC-ASC210243177/2021]	SKISDVKCTSVVLLSVLQQLRVESSSKLWAQCVQLHNDILLAKDTTEAFEKMVSLLSVLLSMQGAVDINKLCEEMLDNRATLQ
UJI69918.1:3860-3942 (2930)	nsp7 [polyprotein=ORF1ab polyprotein] [organism=Severe acute respiratory syndrome coronavirus 2] [isolate=SARS-CoV-2/human/USA/IA-CDC-2-5375318/2021]	SKMSDVKCTSVVLLSVLQQLRVESSSKLWAQCVQLHNDILLAKDTTEAFEKMVSLLSVLLSMQGAIDINKLCEEMLDNRATLQ
UIG56123.1:3860-3942 (2792)	nsp7 [polyprotein=ORF1ab polyprotein] [organism=Severe acute respiratory syndrome coronavirus 2] [isolate=SARS-CoV-2/human/USA/CA-CDPH-3000284874/2021]	SKMSDVKCTSVVLLSVLQQLRVESSSKLWAQCVQLHNDILLAKDTTEAFEKMVSLFSVLLSMQGAVDINKLCEEMLDNRATLQ
UIK70735.1:3860-3942 (2548)	nsp7 [polyprotein=ORF1ab polyprotein] [organism=Severe acute respiratory syndrome coronavirus 2] [isolate=SARS-CoV-2/human/USA/CO-CDPHE-2102482806/2021]	SKMSDVKCTSVVLLSVLQQLRVESSSKLWAQCVQLHNDILLAKATTEAFEKMVSLLSVLLSMQGAVDINKLCEEMLDNRATLQ
QQL90904.1:3860-3942 (2486)	nsp7 [polyprotein=ORF1ab polyprotein] [organism=Severe acute respiratory syndrome coronavirus 2] [isolate=SARS-CoV-2/human/USA/UT-UPHL-2012775940/2020]	SKMSDVKCTSVVLLSVLQQLRVESSSKLWAQCIQLHNDILLAKDTTEAFEKMVSLLSVLLSMQGAVDINKLCEEMLDNRATLQ
UIW58453.1:3855-3937 (2288)	nsp7 [polyprotein=ORF1a polyprotein] [organism=Severe acute respiratory syndrome coronavirus 2] [isolate=SARS-CoV-2/human/USA/MA-CDCBI-CRSP_CSPXM2YWVU3ABJBX/2022]	XXXSDVKCTSVVLLSVLQQLRVESSSKLWAQCVQLHNDILLAKDTTEAFEKMVSLLSVLLSMQGAVDINKLCEEMLDNRATLQ
UAO01654.1:3860-3942 (1903)	nsp7 [polyprotein=ORF1ab polyprotein] [organism=Severe acute respiratory syndrome coronavirus 2] [isolate=SARS-CoV-2/human/USA/TX-CDC-ASC210182657/2021]	SKMSDVKCTSVVLLSVLQQLRVESSSKLWVQCVQLHNDILLAKDTTEAFEKMVSLLSVLLSMQGAVDINKLCEEMLDNRATLQ
UBO36286.1:3860-3942 (1743)	nsp7 [polyprotein=ORF1ab polyprotein] [organism=Severe acute respiratory syndrome coronavirus 2] [isolate=SARS-CoV-2/human/USA/CO-CDPHE-2101609370/2021]	SKMSDVKCTSVVLLSVLQQLRVESSSKLWAQCVQLHNDILLAKDTTEAFGKMVSLLSVLLSMQGAVDINKLCEEMLDNRATLQ
UQR30031.1:3860-3942 (1700)	nsp7 [polyprotein=ORF1ab polyprotein] [organism=Severe acute respiratory syndrome coronavirus 2] [isolate=SARS-CoV-2/human/USA/TG1127770/2021]	SKMSDVKCTSVVLLSVLQQLRVESSSKLWAQCVQLHNDILLAKDTTEAFEKMVSLLSVLLSMQGAVDINKLCEEMLDSRATLQ
QZR38532.1:3860-3942 (1596)	nsp7 [polyprotein=ORF1ab polyprotein] [organism=Severe acute respiratory syndrome coronavirus 2] [isolate=SARS-CoV-2/human/USA/SC-CDC-LC0179390/2021]	SKMSDVKCTSVVLLSVLQQLRVESSSKLWAQCVQLHNDILLAKDTTEAFEKMVSLLSVLLSMHGAVDINKLCEEMLDNRATLQ
UJP76007.1:3860-3942 (1534)	nsp7 [polyprotein=ORF1ab polyprotein] [organism=Severe acute respiratory syndrome coronavirus 2] [isolate=SARS-CoV-2/human/USA/MO-UMGC-28737/2021]	SKMSDVKCTSVVLLSVLQQLRVESSSKLWAQCVQLHNDILLAKDITEAFEKMVSLLSVLLSMQGAVDINKLCEEMLDNRATLQ
UHX57752.1:3841-3923 (1372)	nsp7 [polyprotein=ORF1a polyprotein] [organism=Severe acute respiratory syndrome coronavirus 2] [isolate=SARS-CoV-2/human/USA/B2172/2020]	XXXXXXXCTSVVLLSVLQQLRVESSSKLWAQCVQLHNDILLAKDTTEAFEKMVSLLSVLLSMQGAVDINKLCEEMLDNRATLQ
UAZ09860.1:3857-3939 (1108)	nsp7 [polyprotein=ORF1ab polyprotein] [organism=Severe acute respiratory syndrome coronavirus 2] [isolate=SARS-CoV-2/human/USA/NM-UNM-TC241644/2021]	SKTSDVKCTSVVLLSVLQQLRVESSSKLWAQCVQLHNDILLAKDTTEAFEKMVSLLSVLLSMQGAVDINKLCEEMLDNRATLQ
UID58257.1:3860-3942 (1014)	nsp7 [polyprotein=ORF1ab polyprotein] [organism=Severe acute respiratory syndrome coronavirus 2] [isolate=SARS-CoV-2/human/USA/CA-CDPH-3000119316/2021]	SKMSDVKCTSVVLLSVLQQFRVESSSKLWAQCVQLHNDILLAKDTTEAFEKMVSLLSVLLSMQGAVDINKLCEEMLDNRATLQ
UAQ08308.1:3860-3942 (889)	nsp7 [polyprotein=ORF1ab polyprotein] [organism=Severe acute respiratory syndrome coronavirus 2] [isolate=SARS-CoV-2/human/USA/FL-CDC-LC0207654/2021]	SKMSDVKCTSVVLLSVLQQLRVESSSKLWAQCVQLHNDILLAKDTTEAFEKMVSLLSVLLSMQGAVDINKLCEEMLDNRVTLQ
UIT24900.1:3860-3942 (794)	nsp7 [polyprotein=ORF1ab polyprotein] [organism=Severe acute respiratory syndrome coronavirus 2] [isolate=SARS-CoV-2/human/USA/CA-CDPH-3000012324/2021]	SKMSDVKCTSVVLLSVLQQLRVESSSKLWAQCVQLHNDILLAKDTTEAFEKMVSLLSVLLSIQGAVDINKLCEEMLDNRATLQ
UQH19047.1:3834-3916 (780)	nsp7 [polyprotein=ORF1ab polyprotein] [organism=Severe acute respiratory syndrome coronavirus 2] [isolate=SARS-CoV-2/human/USA/TG1157137/2021]	SKMSDVKCTSVVLLSVLQQLRVESSSKLWAQCVQLXNDILLAKDTTEAFEKMVSLLSVLLSMQGAVDINKLCEEMLDNRATLQ
UIS85015.1:3860-3942 (778)	nsp7 [polyprotein=ORF1ab polyprotein] [organism=Severe acute respiratory syndrome coronavirus 2] [isolate=SARS-CoV-2/human/USA/CA-CDPH-3000022121/2021]	SKMSDVKCTSVVLLSVLQQLRVESSSKLWAQCVQLHNDILLVKDTTEAFEKMVSLLSVLLSMQGAVDINKLCEEMLDNRATLQ
UIF61007.1:3831-3913 (774)	nsp7 [polyprotein=ORF1ab polyprotein] [organism=Severe acute respiratory syndrome coronavirus 2] [isolate=SARS-CoV-2/human/USA/CO-CDPHE-2100956921/2021]	SKMSDVKCTSVVLLSVLQQLRVESSSKLXXXXXXXXXXXXXXXXXXXXXXXXXXXXXXXXXXXXXXXXXXXXXXXXXXXXXXX
WBO01855.1:3857-3939 (730)	nsp7 [polyprotein=ORF1ab polyprotein] [organism=Severe acute respiratory syndrome coronavirus 2] [isolate=SARS-CoV-2/human/USA/WA-UW-22121580387/2022]	SKMSDVKCTSVVLLSVLQQLRVESSSKLWAQCVQLHNDILLAKDTTEAFEKMVSLLSVLLSMQGAVDINKLCDEMLDNRATLQ
UHH87870.1:3860-3942 (725)	nsp7 [polyprotein=ORF1ab polyprotein] [organism=Severe acute respiratory syndrome coronavirus 2] [isolate=SARS-CoV-2/human/USA/AZ-ASU27004/2021]	SKMSDVKCTSVVLLSVLQQLRVESSSKLWAQCVQLHNDILLAKDTTEAFEKMVSLLXXXXXXXXXXXXXXXXXXXXXXXXXXX
UCO25412.1:3860-3942 (718)	nsp7 [polyprotein=ORF1ab polyprotein] [organism=Severe acute respiratory syndrome coronavirus 2] [isolate=SARS-CoV-2/human/USA/CO-CDPHE-2101785769/2021]	SKMSDVKXXXXXXXXXLQQLRVESSSKLWAQCVQLHNDILLAKDTTEAFEKMVSLLSVLLSMQGAVDINKLCEEMLDNRATLQ
UBO10697.1:3860-3942 (706)	nsp7 [polyprotein=ORF1ab polyprotein] [organism=Severe acute respiratory syndrome coronavirus 2] [isolate=SARS-CoV-2/human/USA/MI-CDC-ASC210019108/2021]	SKMSDVKCTSVVLLSVLQQLRVESSSKLWAQCVQLHNDILLAKDTTEAFEKMVSLLSVLLSMQGAVDTNKLCEEMLDNRATLQ
UJE88152.1:3856-3938 (672)	nsp7 [polyprotein=ORF1ab polyprotein] [organism=Severe acute respiratory syndrome coronavirus 2] [isolate=SARS-CoV-2/human/USA/CA-CDC-FG-231527/2022]	SKMSDVKCTSVVLLSVLQQLRVESSSKLWAQCVQLHNDILLAKDTTEAFEKMVSLLSALLSMQGAVDINKLCEEMLDNRATLQ
UJH37962.1:3860-3942 (660)	nsp7 [polyprotein=ORF1ab polyprotein] [organism=Severe acute respiratory syndrome coronavirus 2] [isolate=SARS-CoV-2/human/USA/43234/2020]	SKMSDVKCTSVVLLSVLQQLRVESSSKLWAQCAQLHNDILLAKDTTEAFEKMVSLLSVLLSMQGAVDINKLCEEMLDNRATLQ
UNL34452.1:3856-3938 (657)	nsp7 [polyprotein=ORF1ab polyprotein] [organism=Severe acute respiratory syndrome coronavirus 2] [isolate=SARS-CoV-2/human/USA/WV130519/2022]	SKMSDVKCTSVVLLSVLQQLRVESSSKLWAQCVQLHNDILLAKDTTEAFEKMVSLLSVLLSMQGVVDINKLCEEMLDNRATLQ
UAC17151.1:3860-3942 (656)	nsp7 [polyprotein=ORF1ab polyprotein] [organism=Severe acute respiratory syndrome coronavirus 2] [isolate=SARS-CoV-2/human/USA/AZ-CDC-QDX27790436/2021]	SKMSDVKCTSVVLLSVLQQLRVESSSKLWAQCVQLHNDILLAKDTTEAFEKMVSLLSVLLSMQGAVDINKLCEEMLDNRTTLQ
WEQ24824.1:3857-3939 (636)	nsp7 [polyprotein=ORF1ab polyprotein] [organism=Severe acute respiratory syndrome coronavirus 2] [isolate=SARS-CoV-2/human/USA/CA-CDPH-500098740/2022]	SKMSDVKCTSVVLLSVLQQLRVESSSKLWAQCVQLHNDILLAKDTTEAFEKMVSLLSVLLSMQGAVDINKLCEEMLXXXXXXX
UIW60713.1:3860-3942 (620)	nsp7 [polyprotein=ORF1ab polyprotein] [organism=Severe acute respiratory syndrome coronavirus 2] [isolate=SARS-CoV-2/human/USA/MA-CDCBI-CRSP_P5K7MDNY7TB4JUI6/2022]	SKMSDVKCTSVVLLSVLQQLRVESSSKLWAQCVQLHNDILLAKDTTEAFEKTVSLLSVLLSMQGAVDINKLCEEMLDNRATLQ
WBO28178.1:3857-3939 (608)	nsp7 [polyprotein=ORF1ab polyprotein] [organism=Severe acute respiratory syndrome coronavirus 2] [isolate=SARS-CoV-2/human/USA/WI-UW-4140/2021]	SKMSDVKCTSVVLLSVLQQLRVESSSKLWAQCVQLHNDILLAKDTTEAFXKMVSLLSVLLSMQGAVDINKLCEEMLDNRATLQ
QZW53032.1:3857-3939 (532)	nsp7 [polyprotein=ORF1ab polyprotein] [organism=Severe acute respiratory syndrome coronavirus 2] [isolate=SARS-CoV-2/human/USA/CO-CDPHE-2101395339/2021]	SKMSDVKCTSVVLLSVLQQLRVESSSKLWAQCVQLHNDILLAKDTTEAFEKMVSLLSGLLSMQGAVDINKLCEEMLDNRATLQ
UBN85866.1:3857-3939 (524)	nsp7 [polyprotein=ORF1ab polyprotein] [organism=Severe acute respiratory syndrome coronavirus 2] [isolate=SARS-CoV-2/human/USA/FL-CDC-ASC210070524/2021]	SRMSDVKCTSVVLLSVLQQLRVESSSKLWAQCVQLHNDILLAKDTTEAFEKMVSLLSVLLSMQGAVDINKLCEEMLDNRATLQ
UIX79011.1:3860-3942 (524)	nsp7 [polyprotein=ORF1ab polyprotein] [organism=Severe acute respiratory syndrome coronavirus 2] [isolate=SARS-CoV-2/human/USA/CO-CDC-MMB12263501/2021]	SKMSDVKCTSVVLLSVLQQLRVXXXXXXXXXXXXXXXDILLAKDTTEAFEKMVSLLSVLLSMQGAVDINKLCEEMLDNRATLQ
UQH43500.1:3857-3939 (516)	nsp7 [polyprotein=ORF1ab polyprotein] [organism=Severe acute respiratory syndrome coronavirus 2] [isolate=SARS-CoV-2/human/USA/TG1228127/2022]	XXXXXXXXXXXXXXXXXXXXXXXXXXXXXXXXVQLHNDILLAKDTTEAFEKMVSLLSVLLSMQGAVDINKLCEEMLDNRATLQ
UHZ98408.1:3860-3942 (506)	nsp7 [polyprotein=ORF1ab polyprotein] [organism=Severe acute respiratory syndrome coronavirus 2] [isolate=SARS-CoV-2/human/USA/CO-CDPHE-2102466375/2021]	SKMSDVKCTSVVLLSVLQQLRLESSSKLWAQCVQLHNDILLAKDTTEAFEKMVSLLSVLLSMQGAVDINKLCEEMLDNRATLQ
UQH42586.1:3857-3939 (498)	nsp7 [polyprotein=ORF1ab polyprotein] [organism=Severe acute respiratory syndrome coronavirus 2] [isolate=SARS-CoV-2/human/USA/TG1219624/2022]	XXXXXXXXXXXXXXXXXXXXXXXXXXXXXXXXXXLHNDILLAKDTTEAFEKMVSLLSVLLSMQGAVDINKLCEEMLDNRATLQ
QQL89899.1:3860-3942 (491)	nsp7 [polyprotein=ORF1ab polyprotein] [organism=Severe acute respiratory syndrome coronavirus 2] [isolate=SARS-CoV-2/human/USA/UT-UPHL-2012339228/2020]	SKMSDVKCTSVVLLSVLQQLRVESSSKLWAQCVXXXXXXXXXXXXXXXXXXXXXXXXXXXXXXXXXXXXXXXXXXXXXXXXXX
QSV98604.1:3860-3942 (466)	nsp7 [polyprotein=ORF1ab polyprotein] [organism=Severe acute respiratory syndrome coronavirus 2] [isolate=SARS-CoV-2/human/USA/GA-CDC-LC0021121/2021]	SKMSDVKCTSVVLLSVLQQLRVESSSKLWAQCVQLHNDIILAKDTTEAFEKMVSLLSVLLSMQGAVDINKLCEEMLDNRATLQ
QSG74249.1:3860-3942 (464)	nsp7 [polyprotein=ORF1ab polyprotein] [organism=Severe acute respiratory syndrome coronavirus 2] [isolate=SARS-CoV-2/human/USA/MD-NIH-00032/2020]	SKMSDVKCTSVVLLSVLQQLRVESSSKLWAQCVQLHNDILLAKDTTEAFEKMVSLLSVLLSMQGAVDINNLCEEMLDNRATLQ
QVM45789.1:3857-3939 (440)	nsp7 [polyprotein=ORF1ab polyprotein] [organism=Severe acute respiratory syndrome coronavirus 2] [isolate=SARS-CoV-2/human/USA/PA-CDC-STM-000067031/2021]	SKMSDVRCTSVVLLSVLQQLRVESSSKLWAQCVQLHNDILLAKDTTEAFEKMVSLLSVLLSMQGAVDINKLCEEMLDNRATLQ
UNY43477.1:3860-3942 (426)	nsp7 [polyprotein=ORF1ab polyprotein] [organism=Severe acute respiratory syndrome coronavirus 2] [isolate=SARS-CoV-2/human/USA/CA-CDPH-3000342460/2022]	SKMSDVKCTSVVLLXXLQQLRVESSSKLWAQCVQLHNDILLAKDTTEAFEKMVSLLSVLLSMQGAVDINKLCEEMLDNRATLQ
QOS45707.1:3857-3939 (419)	nsp7 [polyprotein=ORF1ab polyprotein] [organism=Severe acute respiratory syndrome coronavirus 2] [isolate=SARS-CoV-2/human/USA/UT-UPHL-201007338/2020]	XXXXXXXXXXVVLLSVLQQLRVESSSKLWAQCVQLHNDILLAKDTTEAFEKMVSLLSVLLSMQGAVDINKLCEEMLDNRATLQ
UBS18619.1:3860-3942 (407)	nsp7 [polyprotein=ORF1ab polyprotein] [organism=Severe acute respiratory syndrome coronavirus 2] [isolate=SARS-CoV-2/human/USA/MD-MDH-4531/2021]	SKMSDVKCTSVVLLSVLQQLRVESSSRLWAQCVQLHNDILLAKDTTEAFEKMVSLLSVLLSMQGAVDINKLCEEMLDNRATLQ
UIA43056.1:3857-3939 (396)	nsp7 [polyprotein=ORF1a polyprotein] [organism=Severe acute respiratory syndrome coronavirus 2] [isolate=SARS-CoV-2/human/USA/CA-CDPH-3000044707/2021]	SKMSDVKCTSVVLLSXLQQLRVESSSKLWAQCVQLHNDILLAKDTTEAFEKMVSLLSVLLSMQGAVDINKLCEEMLDNRATLQ
UQH18089.1:3838-3920 (388)	nsp7 [polyprotein=ORF1ab polyprotein] [organism=Severe acute respiratory syndrome coronavirus 2] [isolate=SARS-CoV-2/human/USA/TG1158215/2021]	XXXXXXXXXXXXXXXXXXXXXXXXXXXXXXXXXQLHNDILLAKDTTEAFEKMVSLLSVLLSMQGAVDINKLCEEMLDNRATLQ
QXP17468.1:3857-3939 (388)	nsp7 [polyprotein=ORF1ab polyprotein] [organism=Severe acute respiratory syndrome coronavirus 2] [isolate=SARS-CoV-2/human/USA/CA-CDC-2-4595004/2021]	SKMSDVKCASVVLLSVLQQLRVESSSKLWAQCVQLHNDILLAKDTTEAFEKMVSLLSVLLSMQGAVDINKLCEEMLDNRATLQ
QZQ32481.1:3860-3942 (386)	nsp7 [polyprotein=ORF1ab polyprotein] [organism=Severe acute respiratory syndrome coronavirus 2] [isolate=SARS-CoV-2/human/USA/UT-UPHL-210828948533/2021]	SKMSDVKCTSVVLLSVLQQLRVESSSKLWAQCVQLHNDILLAKDTIEAFEKMVSLLSVLLSMQGAVDINKLCEEMLDNRATLQ
QRO03985.1:3860-3942 (378)	nsp7 [polyprotein=ORF1ab polyprotein] [organism=Severe acute respiratory syndrome coronavirus 2] [isolate=SARS-CoV-2/human/USA/CA-Broad_FlowHealth-00052/2021]	SKMSDVKCTSVVLLSVLQQLRVESSSKLWAQCVQLHNDILLAKDTTEAFEKMVSLLSVLLSMQGAVDINKLCEEVLDNRATLQ
QVH89488.1:3857-3939 (358)	nsp7 [polyprotein=ORF1ab polyprotein] [organism=Severe acute respiratory syndrome coronavirus 2] [isolate=SARS-CoV-2/human/USA/WA-CDC-UW21042699678/2021]	SKMSDVKCTSVILLSVLQQLRVESSSKLWAQCVQLHNDILLAKDTTEAFEKMVSLLSVLLSMQGAVDINKLCEEMLDNRATLQ
UFS13018.1:3860-3942 (354)	nsp7 [polyprotein=ORF1ab polyprotein] [organism=Severe acute respiratory syndrome coronavirus 2] [isolate=SARS-CoV-2/human/USA/CO-CDPHE-2102022388/2021]	SKMSDVKCTSVVLLSVLQQLRVESSSKLXXXXVQLHNDILLAKDTTEAFEKMVSLLSVLLSMQGAVDINKLCEEMLDNRATLQ
UAY21548.1:3858-3940 (340)	nsp7 [polyprotein=ORF1ab polyprotein] [organism=Severe acute respiratory syndrome coronavirus 2] [isolate=SARS-CoV-2/human/USA/MA-CDCBI-CRSP_WNLEQL2Y4GGU72YL/2021]	SKMSDVKCTSVVLLSVLQQLRVESSSXXXXXXXXXXXXXXXXXXXXXXXXXXXXXXXXXXXXXXXXXXXXXXXXXXXXXXXXX
UEG29382.1:3860-3942 (338)	nsp7 [polyprotein=ORF1ab polyprotein] [organism=Severe acute respiratory syndrome coronavirus 2] [isolate=SARS-CoV-2/human/USA/GA-CDC-QDX30363233/2021]	SKMSDVKCTSVVLLSVLQQLRIESSSKLWAQCVQLHNDILLAKDTTEAFEKMVSLLSVLLSMQGAVDINKLCEEMLDNRATLQ
QSG77928.1:3860-3942 (329)	nsp7 [polyprotein=ORF1ab polyprotein] [organism=Severe acute respiratory syndrome coronavirus 2] [isolate=SARS-CoV-2/human/USA/TX-CDC-QDX21990456/2021]	SKMSDIKCTSVVLLSVLQQLRVESSSKLWAQCVQLHNDILLAKDTTEAFEKMVSLLSVLLSMQGAVDINKLCEEMLDNRATLQ
QQY97793.2:3860-3942 (328)	nsp7 [polyprotein=ORF1a polyprotein] [organism=Severe acute respiratory syndrome coronavirus 2] [isolate=SARS-CoV-2/human/USA/WA-S3644/2021]	SKMSDVKCTSVVLLSVLQQLRVESSSKLWAQCVQLHNDILLAKDTTEAFEKMVSLLSVLLSMQGAVDINKLCEEMLYNRATLQ
QUS66719.1:3860-3942 (320)	nsp7 [polyprotein=ORF1ab polyprotein] [organism=Severe acute respiratory syndrome coronavirus 2] [isolate=SARS-CoV-2/human/USA/MI-CDC-STM-000055751/2021]	SKMSDVKCTSVVLLSVLQQLRVESSSKLWAQCVQLHNDILLAKGTTEAFEKMVSLLSVLLSMQGAVDINKLCEEMLDNRATLQ
QRM91924.1:3860-3942 (318)	nsp7 [polyprotein=ORF1ab polyprotein] [organism=Severe acute respiratory syndrome coronavirus 2] [isolate=SARS-CoV-2/human/USA/UT-UPHL-2101336885/2020]	SKMSDVKCTSVVLLLVLQQLRVESSSKLWAQCVQLHNDILLAKDTTEAFEKMVSLLSVLLSMQGAVDINKLCEEMLDNRATLQ
UIC65769.1:3860-3942 (316)	nsp7 [polyprotein=ORF1ab polyprotein] [organism=Severe acute respiratory syndrome coronavirus 2] [isolate=SARS-CoV-2/human/USA/UT-UPHL-211123380526/2021]	SKMSDVKCTSVVLLSVLQQLRVESSSKLWAQCVQLHNDILLAKDTTEAFEKMVSLLSVLLSLQGAVDINKLCEEMLDNRATLQ
UPY70511.1:3857-3939 (306)	nsp7 [polyprotein=ORF1ab polyprotein] [organism=Severe acute respiratory syndrome coronavirus 2] [isolate=SARS-CoV-2/human/USA/TG1287588/2022]	XXXXXXXXXXXXXXXXXXXXXXXXXXXXXXXXXXXHNDILLAKDTTEAFEKMVSLLSVLLSMQGAVDINKLCEEMLDNRATLQ
QVL86243.1:3860-3942 (304)	nsp7 [polyprotein=ORF1ab polyprotein] [organism=Severe acute respiratory syndrome coronavirus 2] [isolate=SARS-CoV-2/human/USA/WA-UW-2021041511453/2021]	SKMSDVKCTSVVLLSVFQQLRVESSSKLWAQCVQLHNDILLAKDTTEAFEKMVSLLSVLLSMQGAVDINKLCEEMLDNRATLQ
UHC06464.1:3860-3942 (300)	nsp7 [polyprotein=ORF1ab polyprotein] [organism=Severe acute respiratory syndrome coronavirus 2] [isolate=SARS-CoV-2/human/USA/MI-MDHHS-SC26428/2020]	SKMSXXXXXSVVLLSVLQQLRVESSSKLWAQCVQLHNDILLAKDTTEAFEKMVSLLSVLLSMQGAVDINKLCEEMLDNRATLQ
UII09068.1:3856-3938 (298)	nsp7 [polyprotein=ORF1ab polyprotein] [organism=Severe acute respiratory syndrome coronavirus 2] [isolate=SARS-CoV-2/human/USA/NJ-CDC-IBX322205173160/2021]	SKMSDVKCTSVVLLSVLQQLRVESSSKLWAQCVQLHNDILLARDTTEAFEKMVSLLSVLLSMQGAVDINKLCEEMLDNRATLQ
UDQ18125.1:3860-3942 (298)	nsp7 [polyprotein=ORF1ab polyprotein] [organism=Severe acute respiratory syndrome coronavirus 2] [isolate=SARS-CoV-2/human/USA/TX-CDC-ASC210321067/2021]	SKMSDVKCTSVVLLSVLQQLRVESSSKLWAQCVQLHNDILLAKDTTEAFEKMVSLLSVLLSMQGAVDINKLCEEMLDNRATXX
WBR82425.1:3857-3939 (296)	nsp7 [polyprotein=ORF1a polyprotein] [organism=Severe acute respiratory syndrome coronavirus 2] [isolate=SARS-CoV-2/human/USA/CA-CDPH-6000013770/2022]	SKMSDVKCTSVVLLSVLQQLRVESSSKLWAQCVQLHNDILLAKDTTEAFEKMVSLLSVLLSMXGAVDINKLCEEMLDNRATLQ
QZZ45050.1:3860-3942 (290)	nsp7 [polyprotein=ORF1ab polyprotein] [organism=Severe acute respiratory syndrome coronavirus 2] [isolate=SARS-CoV-2/human/USA/TX-HHD-2108178888/2021]	XXXXXXKCTSVVLLSVLQQLRVESSSKLWAQCVQLHNDILLAKDTTEAFEKMVSLLSVLLSMQGAVDINKLCEEMLDNRATLQ
UPO41956.1:3860-3942 (288)	nsp7 [polyprotein=ORF1ab polyprotein] [organism=Severe acute respiratory syndrome coronavirus 2] [isolate=SARS-CoV-2/human/USA/NMDOH-2021222383/2021]	SKMSDVKCTSVVLLSVLQQLRVESSSKLWAQCVQLHNDILLAKDTTEAFEKMVSLLSVLLSMQGAVDINKLCAEMLDNRATLQ
UCX99879.1:3860-3942 (286)	nsp7 [polyprotein=ORF1ab polyprotein] [organism=Severe acute respiratory syndrome coronavirus 2] [isolate=SARS-CoV-2/human/USA/TX-CDC-STM-000735666/2021]	SKMSDVKCTSVVLLSVLQQLRVESSSKLWAQCVQLHNDILLAKDTTEAFEKMVSLLSILLSMQGAVDINKLCEEMLDNRATLQ
UEZ70780.1:3860-3942 (284)	nsp7 [polyprotein=ORF1ab polyprotein] [organism=Severe acute respiratory syndrome coronavirus 2] [isolate=SARS-CoV-2/human/USA/CO-CDPHE-2101975398/2021]	SKMSDVKCTSVVLLSVLQQLRVESSSKLWAQCVRLHNDILLAKDTTEAFEKMVSLLSVLLSMQGAVDINKLCEEMLDNRATLQ
URD04229.1:3857-3939 (280)	nsp7 [polyprotein=ORF1a polyprotein] [organism=Severe acute respiratory syndrome coronavirus 2] [isolate=SARS-CoV-2/human/USA/MD-CDC-LC0632094/2022]	SKMSDVKCTSVVLLSVLQRLRVESSSKLWAQCVQLHNDILLAKDTTEAFEKMVSLLSVLLSMQGAVDINKLCEEMLDNRATLQ
USW38788.1:3822-3904 (270)	nsp7 [polyprotein=ORF1ab polyprotein] [organism=Severe acute respiratory syndrome coronavirus 2] [isolate=SARS-CoV-2/human/USA/CO-CDPHE-2103360917/2022]	SKMSDVKCTSVVLLSVLQQLRVESSSKLWAQCVQLHNGILLAKDTTEAFEKMVSLLSVLLSMQGAVDINKLCEEMLDNRATLQ
UNL23849.1:3856-3938 (266)	nsp7 [polyprotein=ORF1ab polyprotein] [organism=Severe acute respiratory syndrome coronavirus 2] [isolate=SARS-CoV-2/human/USA/WV129642/2022]	SKMSDVKCTSVVLLSVLQQLRVESSSKLWAQCVQLHNDTLLAKDTTEAFEKMVSLLSVLLSMQGAVDINKLCEEMLDNRATLQ
UTQ22308.1:3860-3942 (264)	nsp7 [polyprotein=ORF1ab polyprotein] [organism=Severe acute respiratory syndrome coronavirus 2] [isolate=SARS-CoV-2/Odocoileus virginianus/USA/119770/2021]	SKMSDVKCTSVVLLSVLQQLRVESSSKLWAQCVQLXXXXXXAKDTTEAFEKMVSLLSVLLSMQGAVDINKLCEEMLDNRATLQ
QZR86887.1:3743-3825 (252)	nsp7 [polyprotein=ORF1ab polyprotein] [organism=Severe acute respiratory syndrome coronavirus 2] [isolate=SARS-CoV-2/human/USA/KY-CDC-LC0189864/2021]	SKMSDVKCTSVVLLSVLQQLRVESSSKLWAQCVQLHNDILLAKDTTEAFEKMVLLLSVLLSMQGAVDINKLCEEMLDNRATLQ
QRC46787.1:3860-3942 (242)	nsp7 [polyprotein=ORF1ab polyprotein] [organism=Severe acute respiratory syndrome coronavirus 2] [isolate=SARS-CoV-2/human/USA/DC-CDC-2-4058073/2020]	SKMSDVKCTSVVLLSVLQQLRVESSSKLWAQCVQLHNDILLAKDTTEAFEKIVSLLSVLLSMQGAVDINKLCEEMLDNRATLQ
UMQ83124.1:3857-3939 (240)	nsp7 [polyprotein=ORF1ab polyprotein] [organism=Severe acute respiratory syndrome coronavirus 2] [isolate=SARS-CoV-2/human/USA/TN-VUMC-O-2458/2021]	SKMSDVKCTSVVLLSVLQQLRVESSSXXXXXXVQLHNDILLAKDTTEAFEKMVSLLSVLLSMQGAVDINKLCEEMXXXXXXLQ
QVI10959.1:3860-3942 (224)	nsp7 [polyprotein=ORF1ab polyprotein] [organism=Severe acute respiratory syndrome coronavirus 2] [isolate=SARS-CoV-2/human/USA/CA-CZB-29948/2021]	SKMSDVKCTSVVLLSVLQQLRVESSSKLWAQCVQLHNDILLAKDTTEAFEKMVSLLSVLLSMQGAVDINKLCEEMLGNRATLQ
QRX56328.1:3860-3942 (218)	nsp7 [polyprotein=ORF1ab polyprotein] [organism=Severe acute respiratory syndrome coronavirus 2] [isolate=SARS-CoV-2/human/USA/FL-CDC-LC0013831/2021]	SKMSDVKCISVVLLSVLQQLRVESSSKLWAQCVQLHNDILLAKDTTEAFEKMVSLLSVLLSMQGAVDINKLCEEMLDNRATLQ
UFK19497.1:3860-3942 (206)	nsp7 [polyprotein=ORF1ab polyprotein] [organism=Severe acute respiratory syndrome coronavirus 2] [isolate=SARS-CoV-2/human/USA/MN-CDC-IBX219535679063/2021]	SKMSDVKCTSVVLLSVLQQLRVESSSKLWAQCVQLHNAILLAKDTTEAFEKMVSLLSVLLSMQGAVDINKLCEEMLDNRATLQ
UWK51586.1:3860-3942 (204)	nsp7 [polyprotein=ORF1ab polyprotein] [organism=Severe acute respiratory syndrome coronavirus 2] [isolate=SARS-CoV-2/human/USA/LA-EVTL8736/2021]	SKXSDVKCTSVVLLSVLQQLRVESSSKLWAQCVQLHNDILLAKDTTEAFEKMVSLLSVLLSMQGAVDINKLCEEMLDNRATLQ
UBE73387.1:3857-3939 (202)	nsp7 [polyprotein=ORF1ab polyprotein] [organism=Severe acute respiratory syndrome coronavirus 2] [isolate=SARS-CoV-2/human/USA/WA-CDC-LC0069625/2021]	SKMSDVKCTSVVLLSVLQQLRVESSSKSWAQCVQLHNDILLAKDTTEAFEKMVSLLSVLLSMQGAVDINKLCEEMLDNRATLQ
UUH05178.1:3857-3939 (201)	nsp7 [polyprotein=ORF1ab polyprotein] [organism=Severe acute respiratory syndrome coronavirus 2] [isolate=SARS-CoV-2/human/USA/VA-CDC-QDX39121292/2022]	SKMSDVKCTSVVLLSVLQQLRVESSSKLWARCVQLHNDILLAKDTTEAFEKMVSLLSVLLSMQGAVDINKLCEEMLDNRATLQ
UVY70515.1:3857-3939 (201)	nsp7 [polyprotein=ORF1ab polyprotein] [organism=Severe acute respiratory syndrome coronavirus 2] [isolate=SARS-CoV-2/human/USA/CO-CDPHE-2103499906/2022]	SKMSDVKCTSVVLLSVLQQLRVESSSKLWAQCVQLHNDILLAKDTTEAFEKMVSLLSVLLSMQGAVDINKLCGEMLDNRATLQ
UBM65520.1:3860-3942 (200)	nsp7 [polyprotein=ORF1ab polyprotein] [organism=Severe acute respiratory syndrome coronavirus 2] [isolate=SARS-CoV-2/human/USA/MA-CDCBI-CRSP_LXVVGDBA6QA2JPI6/2021]	SKMSDVKCTSVVLLSVLQQLRVESSSKLWAQCVQLHNDILLAKDTTEAFEKMVSLLSFLLSMQGAVDINKLCEEMLDNRATLQ
UGN67979.1:3860-3942 (198)	nsp7 [polyprotein=ORF1ab polyprotein] [organism=Severe acute respiratory syndrome coronavirus 2] [isolate=SARS-CoV-2/human/USA/MI-MDHHS-SC32581/2021]	SKXXXXXXXSVVLLSVLQQLRVESSSKLWAQCVQLHNDILLAKDTTEAFEKMVSLLSVLLSMQGAVDINKLCEEMLDNRATLQ
UER22051.1:3860-3942 (194)	nsp7 [polyprotein=ORF1ab polyprotein] [organism=Severe acute respiratory syndrome coronavirus 2] [isolate=SARS-CoV-2/human/USA/NY-CDC-ASC210468926/2021]	XXMSDVXXXSVVLLSVLQQLRVESSSKLWAQCVQLHNDILLAKDTTEAFEKMVSLLSVLLSMQGAVDINKLCEEMLDNRATLQ
QRN12805.1:3860-3942 (194)	nsp7 [polyprotein=ORF1ab polyprotein] [organism=Severe acute respiratory syndrome coronavirus 2] [isolate=SARS-CoV-2/human/USA/WA-S4355/2021]	SKMSDVKCTSVVLLSVLQQLRVESSSKLWAQCVQLHNDILLAKDTTEAFEKMVSLLSVLLSMQGAVDVNKLCEEMLDNRATLQ
URW02959.1:3830-3912 (192)	nsp7 [polyprotein=ORF1ab polyprotein] [organism=Severe acute respiratory syndrome coronavirus 2] [isolate=SARS-CoV-2/human/USA/NJ-PHEL-V22024168/2022]	SKMSDVKCTSVVLLSVLQQLRVESSSKLWAQCVQLHNDILLTKDTTEAFEKMVSLLSVLLSMQGAVDINKLCEEMLDNRATLQ
UUK03160.1:3857-3939 (188)	nsp7 [polyprotein=ORF1ab polyprotein] [organism=Severe acute respiratory syndrome coronavirus 2] [isolate=SARS-CoV-2/human/USA/GA-CDC-STM-JB8TDYTKG/2022]	SKMSDVKCTSVVLLSVLQQLRVESSSKLWAQCVQLHNEILLAKDTTEAFEKMVSLLSVLLSMQGAVDINKLCEEMLDNRATLQ
UIW39184.1:3856-3938 (188)	nsp7 [polyprotein=ORF1ab polyprotein] [organism=Severe acute respiratory syndrome coronavirus 2] [isolate=SARS-CoV-2/human/USA/OSPHL03771/2021]	SKMSDVKCTSVVLLSVLQQLRVESSSKLWAQCVQLHNDILLAKDTTEAFEKXXXXXXXXXXXXXXXXXXKLCEEMLDNRATLQ
UNY43399.1:3860-3942 (182)	nsp7 [polyprotein=ORF1ab polyprotein] [organism=Severe acute respiratory syndrome coronavirus 2] [isolate=SARS-CoV-2/human/USA/CA-CDPH-3000341228/2022]	SKMSDVKCTSVVLXXXLQQLRVESSSKLWAQCVQLHNDILLAKDTTEAFEKMVSLLSVLLSMQGAVDINKLCEEMLDNRATLQ
UBY20411.1:3860-3942 (182)	nsp7 [polyprotein=ORF1a polyprotein] [organism=Severe acute respiratory syndrome coronavirus 2] [isolate=SARS-CoV-2/human/USA/2109160315/2021]	XXXXXXXXXXXVLLSVLQQLRVESSSKLWAQCVQLHNDILLAKDTTEAFEKMVSLLSVLLSMQGAVDINKLCEEMLDNRATLQ
UET46120.1:3860-3942 (180)	nsp7 [polyprotein=ORF1a polyprotein] [organism=Severe acute respiratory syndrome coronavirus 2] [isolate=SARS-CoV-2/human/USA/CA-CDC-ASC210495530/2021]	SKMSDVKCTSVVLLSVLQQLRVESSSKLWAQCVQLHNDILLAKDTTEAFEKMVSLLSVLLSMQGAVDINKLCEEMLDNRATLX
UWL34222.1:3857-3939 (180)	nsp7 [polyprotein=ORF1ab polyprotein] [organism=Severe acute respiratory syndrome coronavirus 2] [isolate=SARS-CoV-2/human/USA/CA-CDC-LC0865330/2022]	SKMSDVKCTSVVLLSVLQQLRVESSSKLWAQCVQLHNDILLAKDTTEAFERMVSLLSVLLSMQGAVDINKLCEEMLDNRATLQ
UBP84741.1:3860-3942 (180)	nsp7 [polyprotein=ORF1ab polyprotein] [organism=Severe acute respiratory syndrome coronavirus 2] [isolate=SARS-CoV-2/human/USA/CA-CDPH-3000129117/2021]	SKMSDVKCTSVVXXXXLQQLRVESSSKLWAQCVQLHNDILLAKDTTEAFEKMVSLLSVLLSMQGAVDINKLCEEMLDNRATLQ
UCY06482.1:3860-3942 (178)	nsp7 [polyprotein=ORF1a polyprotein] [organism=Severe acute respiratory syndrome coronavirus 2] [isolate=SARS-CoV-2/human/USA/PA-CDC-STM-000737358/2021]	SKMSDVKCTSVVLLSVLQQLRVESSSKLWAQCVXXXNDILLAKDTTEAFEKMVSLLSVLLSMQGAVDINKLCEEMLDNRATLQ
WBV06191.1:3857-3939 (176)	nsp7 [polyprotein=ORF1ab polyprotein] [organism=Severe acute respiratory syndrome coronavirus 2] [isolate=SARS-CoV-2/human/USA/CA-CDC-STM-DCJX7Y98Z/2023]	SKMSDVKCTSVVLLSVLQQLRVESSSKLWAQCVQLHNDILLAKDTTEAFEKMVSLLSVLLSVQGAVDINKLCEEMLDNRATLQ
UBV55328.1:3860-3942 (172)	nsp7 [polyprotein=ORF1ab polyprotein] [organism=Severe acute respiratory syndrome coronavirus 2] [isolate=SARS-CoV-2/human/USA/MN-CDC-IBX430944219932/2021]	XXXXXXXXTSVVLLSVLQQLRVESSSKLWAQCVQLHNDILLAKDTTEAFEKMVSLLSVLLSMQGAVDINKLCEEMLDNRATLQ
UVB51401.1:3857-3939 (170)	nsp7 [polyprotein=ORF1ab polyprotein] [organism=Severe acute respiratory syndrome coronavirus 2] [isolate=SARS-CoV-2/human/USA/FL-CDC-LC0820250/2022]	SKMSDVKCTSVVLLSVLQQLRVESSSKLWAQCVQLHNDILLAKDTTEAFEKMVSLISVLLSMQGAVDINKLCEEMLDNRATLQ
UFC56779.1:3860-3942 (168)	nsp7 [polyprotein=ORF1a polyprotein] [organism=Severe acute respiratory syndrome coronavirus 2] [isolate=SARS-CoV-2/human/USA/FL-CDC-ASC210464552/2021]	SKMSDVKCTSVVLLSVLQQLRVESSSKLWAQCVQLHNDILLAKDTTEAFEKMVSLLSVLLSMQGAVDINKLCEEMLDNRAXLQ
QTH35636.1:3860-3942 (166)	nsp7 [polyprotein=ORF1ab polyprotein] [organism=Severe acute respiratory syndrome coronavirus 2] [isolate=SARS-CoV-2/human/USA/TX-DSHS-4544/2020]	SKMSDVKCTSVVLLSVLQQLRVESSSKLWAQCCQLHNDILLAKDTTEAFEKMVSLLSVLLSMQGAVDINKLCEEMLDNRAILQ
UCO78081.1:3860-3942 (164)	nsp7 [polyprotein=ORF1ab polyprotein] [organism=Severe acute respiratory syndrome coronavirus 2] [isolate=SARS-CoV-2/human/USA/TG1046740/2021]	SKMSDVKCTSVVLLSVLQQLRVESSSKLWAQCVQLHNXILLAKDTTEAFEKMVSLLSVLLSMQGAVDINKLCEEMLDNRATLQ
QQV35412.1:3860-3942 (162)	nsp7 [polyprotein=ORF1ab polyprotein] [organism=Severe acute respiratory syndrome coronavirus 2] [isolate=SARS-CoV-2/human/USA/AK-CDC-2-3714493/2020]	SKMSDVKCTSVVLLSVLQQLRVESSSKLWAQCVQLHNDILLAKDTTEAFEKMVSLLSVLLSMQGAVDINKLCEETLDNRATLQ
UAM20561.1:3860-3942 (160)	nsp7 [polyprotein=ORF1ab polyprotein] [organism=Severe acute respiratory syndrome coronavirus 2] [isolate=SARS-CoV-2/human/USA/VA-CDC-LC0201388/2021]	SKMSDVKCTSVVLLSVLQQLRVESSSKLWAQCVQLHNDILLAKDTTEVFEKMVSLLSVLLSMQGAVDINKLCEEMLDNRATLQ
UDB79861.1:3860-3942 (160)	nsp7 [polyprotein=ORF1ab polyprotein] [organism=Severe acute respiratory syndrome coronavirus 2] [isolate=SARS-CoV-2/human/USA/OR-UW-21082979475/2021]	SKMSDVKCTSVVLLSVLQQLGVESSSKLWAQCVQLHNDILLAKDTTEAFEKMVSLLSVLLSMQGAVDINKLCEEMLDNRATLQ
UBY56908.1:3860-3942 (158)	nsp7 [polyprotein=ORF1ab polyprotein] [organism=Severe acute respiratory syndrome coronavirus 2] [isolate=SARS-CoV-2/human/USA/TN-CDC-ASC210079980/2021]	SKMSDVKCTSVVLLSVLQQLRVESSSKLWAQCVHLHNDILLAKDTTEAFEKMVSLLSVLLSMQGAVDINKLCEEMLDNRATLQ
UAJ41076.1:3860-3942 (156)	nsp7 [polyprotein=ORF1ab polyprotein] [organism=Severe acute respiratory syndrome coronavirus 2] [isolate=SARS-CoV-2/human/USA/NY-CDC-ASC210277550/2021]	XKMSDVKCTSVVLLSVLQQLRVESSSKLWAQCVQLHNDILLAKDTTEAFEKMVSLLSVLLSMQGAVDINKLCEEMLDNRATLQ
UJT51609.1:3856-3938 (156)	nsp7 [polyprotein=ORF1ab polyprotein] [organism=Severe acute respiratory syndrome coronavirus 2] [isolate=SARS-CoV-2/human/USA/JQPQ/2022]	SKMSDVKCTSVVLLSVLQQLRVESSSXXXXXXXXXXXXXXXXXXXXXXXXXXXXXXXXXXXXXXXXXXXKLCEEMLDNRATLQ
UZM37128.1:3857-3939 (154)	nsp7 [polyprotein=ORF1ab polyprotein] [organism=Severe acute respiratory syndrome coronavirus 2] [isolate=SARS-CoV-2/human/USA/CA-LACPHL-AF15294/2022]	SKMSDVKCTSVVLLSVLQQLRVESSSKLWTQCVQLHNDILLAKDTTEAFEKMVSLLSVLLSMQGAVDINKLCEEMLDNRATLQ
ULH38729.1:3857-3939 (154)	nsp7 [polyprotein=ORF1ab polyprotein] [organism=Severe acute respiratory syndrome coronavirus 2] [isolate=SARS-CoV-2/human/USA/CUMC-21081089/2021]	SKMSDVKCTSVVLLSVLQQLRVESSSKLXXXXXXXXXXXXXXXXXXXXXXXXXXLLSVLLSMQGAVDINKLCEEMLDNRATLQ
URH21377.1:3855-3937 (152)	nsp7 [polyprotein=ORF1ab polyprotein] [organism=Severe acute respiratory syndrome coronavirus 2] [isolate=SARS-CoV-2/human/USA/CA-CDPH-3000339248/2022]	SKMSDVKCTSVXXXXXLQQLRVESSSKLWAQCVQLHNDILLAKDTTEAFEKMVSLLSVLLSMQGAVDINKLCEEMLDNRATLQ
UAU19486.1:3855-3937 (149)	nsp7 [polyprotein=ORF1ab polyprotein] [organism=Severe acute respiratory syndrome coronavirus 2] [isolate=SARS-CoV-2/human/USA/CA-CDC-FG-069406/2021]	SKMSDVKCTSVVLLSVLQQLRVESXSKLWAQCVQLHNDILLAKDTTEAFEKMVSLLSVLLSMQGAVDINKLCEEMLDNRATLQ
UBL25369.1:3860-3942 (148)	nsp7 [polyprotein=ORF1ab polyprotein] [organism=Severe acute respiratory syndrome coronavirus 2] [isolate=SARS-CoV-2/human/USA/FL-CDC-LC0255756/2021]	SKMSDVKCTSVVLLSVLQQLRVESSSKLWAQCVQLHNDILLAKDTTEAFEKMVSLLSVLLSMQGALDINKLCEEMLDNRATLQ
UPY69925.1:3857-3939 (148)	nsp7 [polyprotein=ORF1ab polyprotein] [organism=Severe acute respiratory syndrome coronavirus 2] [isolate=SARS-CoV-2/human/USA/TG1224214/2022]	XXXXXXXXXXXXXXXXXXXXXXXXXXXXXXXXXXXXXDILLAKDTTEAFEKMVSLLSVLLSMQGAVDINKLCEEMLDNRATLQ
UHB49919.1:3860-3942 (146)	nsp7 [polyprotein=ORF1ab polyprotein] [organism=Severe acute respiratory syndrome coronavirus 2] [isolate=SARS-CoV-2/human/USA/MI-MDHHS-SC36500/2021]	SKMXXXXXXSVVLLSVLQQLRVESSSKLWAQCVQLHNDILLAKDTTEAFEKMVSLLSVLLSMQGAVDINKLCEEMLDNRATLQ
UFC17223.1:3860-3942 (146)	nsp7 [polyprotein=ORF1ab polyprotein] [organism=Severe acute respiratory syndrome coronavirus 2] [isolate=SARS-CoV-2/human/USA/TX-CDC-ASC210447296/2021]	SKMSDVKCTSVVLLSVLQQLRVESSSKLWAQCVQLHXXXXXAKDTTEAFEKMVSLLSVLLSMQGAVDINKLCEEMLDNRATLQ
UNR83079.1:3856-3938 (144)	nsp7 [polyprotein=ORF1ab polyprotein] [organism=Severe acute respiratory syndrome coronavirus 2] [isolate=SARS-CoV-2/human/USA/CO-CDPHE-2102962906/2022]	SKMSDVKCTSVVLLSVLQQLRVESSSKLWAQCVQLHNDIFLAKDTTEAFEKMVSLLSVLLSMQGAVDINKLCEEMLDNRATLQ
UBW37866.1:3755-3837 (138)	nsp7 [polyprotein=ORF1ab polyprotein] [organism=Severe acute respiratory syndrome coronavirus 2] [isolate=SARS-CoV-2/human/USA/MO-CDC-LC0272266/2021]	SKMSDVKCTSVVLLSVLQQLRVESSSKLWAQCVQLHNDILLAKDTTGAFEKMVSLLSVLLSMQGAVDINKLCEEMLDNRATLQ
WCC75495.1:3569-3651 (132)	nsp7 [polyprotein=ORF1ab polyprotein] [organism=Severe acute respiratory syndrome coronavirus 2] [isolate=SARS-CoV-2/human/USA/VA-VTVAS3-GSC40883/2022]	SKMSDVKCTSVVXXXXXXXXXXXXXXXXXXXXXXXXXXXXXXXXXXXXXXXXXXXXXXXXXXXXXXXXXXXXXXXXXXXXXXX
UWX33381.1:3828-3910 (130)	nsp7 [polyprotein=ORF1ab polyprotein] [organism=Severe acute respiratory syndrome coronavirus 2] [isolate=SARS-CoV-2/human/USA/NJ-PHEL-V22039905/2022]	SKMSDVKCTSVVLLSVLQQLRVESSSKLWAQCVQLHNDILXAKDTTEAFEKMVSLLSVLLSMQGAVDINKLCEEMLDNRATLQ
UXL81179.1:3860-3942 (130)	nsp7 [polyprotein=ORF1ab polyprotein] [organism=Severe acute respiratory syndrome coronavirus 2] [isolate=SARS-CoV-2/human/BEN/528835/2021]	XXXXXXXXXXXXXXXXXXXXXXXXXXXXXXXXXXXXXXXLLAKDTTEAFEKMVSLLSVLLSMQGAVDINKLCEEMLDNRATLQ
UFY07448.1:3860-3942 (130)	nsp7 [polyprotein=ORF1ab polyprotein] [organism=Severe acute respiratory syndrome coronavirus 2] [isolate=SARS-CoV-2/human/USA/CO-CDC-MMB11486660/2021]	SKMSDVKCTSVVLLSVLQQLRVESSSXXXXXXXXXHNDILLAKDTTEAFEKMVSLLSVLLSMQGAVDINKLCEEMLDNRATLQ
QSW59382.1:3860-3942 (128)	nsp7 [polyprotein=ORF1ab polyprotein] [organism=Severe acute respiratory syndrome coronavirus 2] [isolate=SARS-CoV-2/human/USA/CA-CZB-25558/2021]	SKMSDVKCTSVVLLSVLQQLRVESSSKLWAQCCQLHNDILLAKDTTEAFEKMVSLLSVLLSMQGVVDINKLCEEMLDNRAILQ
QPN04020.1:3860-3942 (128)	nsp7 [polyprotein=ORF1ab polyprotein] [organism=Severe acute respiratory syndrome coronavirus 2] [isolate=SARS-CoV-2/human/USA/IL-UW-2033/2020]	SKMSDVKCTSVVLLSVLQQLRVESSSKLWAQCVQLHNDILLAKDTTEAFEKMVSLLSVLLSMQGAVDINKXCEEMLDNRATLQ
UFC86604.1:3860-3942 (128)	nsp7 [polyprotein=ORF1ab polyprotein] [organism=Severe acute respiratory syndrome coronavirus 2] [isolate=SARS-CoV-2/human/USA/TX-CDC-ASC210472048/2021]	SKMSDVKCTSVVLLSVLQQLRVESSSKLWAQCVQLHNDILLAKDTTEAFKKMVSLLSVLLSMQGAVDINKLCEEMLDNRATLQ
UIX79868.1:3856-3938 (128)	nsp7 [polyprotein=ORF1ab polyprotein] [organism=Severe acute respiratory syndrome coronavirus 2] [isolate=SARS-CoV-2/human/USA/VA-CDC-MMB12337340/2021]	SKMSDVKCTSVVLLSVLQQLRVXXXXXXXXXXXXXHNDILLAKDTTEAFEKMVSLLSVLLSMQGAVDINKLCEEMLDNRATLQ
UQD12244.1:3832-3914 (126)	nsp7 [polyprotein=ORF1a polyprotein] [organism=Severe acute respiratory syndrome coronavirus 2] [isolate=SARS-CoV-2/human/FRA/IHUCOVID-066853_Nova1/2022]	SKMSDVKCTSVVLLSVLQQLRVESSSKLWAQXXXXXXXXXXAKDTTEAFEKMVSLLSVLLSMQGAVDINKLCEEMLDNRATLQ
WBG39044.1:3857-3939 (126)	nsp7 [polyprotein=ORF1ab polyprotein] [organism=Severe acute respiratory syndrome coronavirus 2] [isolate=SARS-CoV-2/human/USA/CA-CDC-LC0971327/2022]	SKMSDVKCTSVVLLSVLQQLRVESSSKLWAQCVQLHNDILLAKDTTEAFEKMVSLLSVLLSMQGAVDINKLCEEMMDNRATLQ
UOF56084.1:3857-3939 (124)	nsp7 [polyprotein=ORF1ab polyprotein] [organism=Severe acute respiratory syndrome coronavirus 2] [isolate=SARS-CoV-2/human/USA/NJ-CDC-LC0567438/2022]	SKMSDVKCTSVVLLSVLQQLRVESSSKLWSQCVQLHNDILLAKDTTEAFEKMVSLLSVLLSMQGAVDINKLCEEMLDNRATLQ
UMO67429.1:3856-3938 (122)	nsp7 [polyprotein=ORF1ab polyprotein] [organism=Severe acute respiratory syndrome coronavirus 2] [isolate=SARS-CoV-2/human/USA/IL-CDC-ASC210750577/2022]	SKMSDVKCTSVVLLSVLQQLRVESSSKLWAQCVQLHNDILLAKDTTEAFEKMVSLLSVLLSXXXXXXXXXXXXXXXXXXXXXX
ULD69249.1:3856-3938 (120)	nsp7 [polyprotein=ORF1ab polyprotein] [organism=Severe acute respiratory syndrome coronavirus 2] [isolate=SARS-CoV-2/human/USA/NC-CDC-MMB13802828/2022]	SKMSDVKCTSVVLLSVLQQLRVESSSKLWAQCVQLHNDILLAKDTTEAFEKXXXXXXXXXXXXXXXXXNKLCEEMLDNRATLQ
UBT15981.1:3860-3942 (120)	nsp7 [polyprotein=ORF1ab polyprotein] [organism=Severe acute respiratory syndrome coronavirus 2] [isolate=SARS-CoV-2/human/USA/NJ-PHEL-V21011367/2021]	SKMSDVKCTSVVLLSVLQQLRVESSSKLWAQCVQLHNDILLAKDTTEAFEKMVSLLSVLLSMQGAVDIXKLCEEMLDNRATLQ
USG49202.1:3857-3939 (120)	nsp7 [polyprotein=ORF1ab polyprotein] [organism=Severe acute respiratory syndrome coronavirus 2] [isolate=SARS-CoV-2/human/VNM/OUCRU-NHTD891/2022]	SKMSDVKCTSVVLLSVLQQLRVESSSKLWAQCVQLHNDILLAKDTTEAFEKMVSLLSVLLSMQGAVGINKLCEEMLDNRATLQ
UDK47778.1:3860-3942 (118)	nsp7 [polyprotein=ORF1ab polyprotein] [organism=Severe acute respiratory syndrome coronavirus 2] [isolate=SARS-CoV-2/human/USA/TX-CDC-ASC210279257/2021]	SKMSDVKCTSVVLLSVLQQLRVESSSKLWAQCVQLHNDILLAKDTTEAFEKMVSLLSVLLSMQGAVDINKLCEEMLDNRAXXX
URN80630.1:3672-3754 (118)	nsp7 [polyprotein=ORF1ab polyprotein] [organism=Severe acute respiratory syndrome coronavirus 2] [isolate=SARS-CoV-2/human/MYS/K1/2022]	SKMSDVKCTSVVLLSVLQQLRVESSSKLWAQCVQLHNDILLAKDTTEAFEKMVSLLSVLLSMQGAVDINKLCEEMLXNRATLQ
QNA39808.1:3860-3942 (116)	nsp7 [polyprotein=ORF1ab polyprotein] [organism=Severe acute respiratory syndrome coronavirus 2] [isolate=SARS-CoV-2/human/USA/MA-MGH-00873/2020]	SKMSDVKCTSVVLLSVLQQLRVESSSXXXXXXVQLHNDILLAKDTTEAFEKMVSLLSVLLSMQGAVDINKLCEEMLDNRATLQ
QXE47834.1:3857-3939 (114)	nsp7 [polyprotein=ORF1ab polyprotein] [organism=Severe acute respiratory syndrome coronavirus 2] [isolate=SARS-CoV-2/human/USA/WA-UW-21060564889/2021]	SKMSDVKCTSVVLLSVLQQLRVESSSKLWAQCVQLHNNILLAKDTTEAFEKMVSLLSVLLSMQGAVDINKLCEEMLDNRATLQ
UQH50045.1:3860-3942 (112)	nsp7 [polyprotein=ORF1ab polyprotein] [organism=Severe acute respiratory syndrome coronavirus 2] [isolate=SARS-CoV-2/human/USA/TG1249348/2021]	XXXXXXXXXXXXXXXXXXXXXXXXXXXXXXXXXXXXXXXXXXXDTTEAFEKMVSLLSVLLSMQGAVDINKLCEEMLDNRATLQ
UQH17859.1:3833-3915 (112)	nsp7 [polyprotein=ORF1a polyprotein] [organism=Severe acute respiratory syndrome coronavirus 2] [isolate=SARS-CoV-2/human/USA/TG1158187/2021]	XXXXXXXXXXXXXXXXXXXXXXXXXXXXXXXXXXXXNDILLAKDTTEAFEKMVSLLSVLLSMQGAVDINKLCEEMLDNRATLQ
QJR91003.1:3860-3942 (112)	nsp7 [polyprotein=ORF1ab polyprotein] [organism=Severe acute respiratory syndrome coronavirus 2] [isolate=SARS-CoV-2/human/AUS/VIC604/2020]	SKMSDVKCTSVVLLSVLQQLRVESSXKLWAQCVQLHNDILLAKDTTEAFEKMVSLLSVLLSMQGAVDINKLCEEMLDNRATLQ
UBV65033.1:3860-3942 (112)	nsp7 [polyprotein=ORF1ab polyprotein] [organism=Severe acute respiratory syndrome coronavirus 2] [isolate=SARS-CoV-2/human/USA/MN-CDC-IBX961551389162/2021]	SKMSDVKCTSVVLLSVLQKLRVESSSKLWAQCVQLHNDILLAKDTTEAFEKMVSLLSVLLSMQGAVDINKLCEEMLDNRATLQ
UUE07729.1:3857-3939 (108)	nsp7 [polyprotein=ORF1ab polyprotein] [organism=Severe acute respiratory syndrome coronavirus 2] [isolate=SARS-CoV-2/human/USA/CA-CDC-QDX38922567/2022]	SKMSDVKCTSVVLLSVLQQLRVESSSKLWAQCVQLHNDILLAKDTTVAFEKMVSLLSVLLSMQGAVDINKLCEEMLDNRATLQ
UKD44815.1:3860-3942 (108)	nsp7 [polyprotein=ORF1ab polyprotein] [organism=Severe acute respiratory syndrome coronavirus 2] [isolate=SARS-CoV-2/human/USA/NC-CORVASEQ-DH-350M336000006473/2021]	SKMSDVKCTSVVLFSVLQQLRVESSSKLWAQCVQLHNDILLAKDTTEAFEKMVSLLSVLLSMQGAVDINKLCEEMLDNRATLQ
UHK00519.1:3860-3942 (106)	nsp7 [polyprotein=ORF1ab polyprotein] [organism=Severe acute respiratory syndrome coronavirus 2] [isolate=SARS-CoV-2/human/USA/CO-CDPHE-2102174902/2021]	SKMSDVKCTSVVLLSVLQQLRVESSSKLWAQCVQVHNDILLAKDTTEAFEKMVSLLSVLLSMQGAVDINKLCEEMLDNRATLQ
USO18141.1:3857-3939 (106)	nsp7 [polyprotein=ORF1ab polyprotein] [organism=Severe acute respiratory syndrome coronavirus 2] [isolate=SARS-CoV-2/human/USA/OKPHL0017967/2022]	SKMSDVKCTSVVLLSVLQQLRVESSSKLWAQCVQLHNDILLAKDTTEAFEKMVSLLSVLLSMQGAVDMNKLCEEMLDNRATLQ
UDE58524.1:3860-3942 (105)	nsp7 [polyprotein=ORF1ab polyprotein] [organism=Severe acute respiratory syndrome coronavirus 2] [isolate=SARS-CoV-2/human/USA/OH-CDC-ASC210287239/2021]	SKMSDVKCTSVVLLAVLQQLRVESSSKLWAQCVQLHNDILLAKDTTEAFEKMVSLLSVLLSMQGAVDINKLCEEMLDNRATLQ
UBF79689.1:3857-3939 (102)	nsp7 [polyprotein=ORF1a polyprotein] [organism=Severe acute respiratory syndrome coronavirus 2] [isolate=SARS-CoV-2/human/USA/GA-CDC-MMB09474506/2021]	SKMSDVKCTSVVLLSVLQQLRVESSSKLWAQCVQLHNDILLAKDTTEAFEKMVSXXXXXXXXXXXXXXNKLCEEMLDNRATLQ
UQR22925.1:3856-3938 (100)	nsp7 [polyprotein=ORF1ab polyprotein] [organism=Severe acute respiratory syndrome coronavirus 2] [isolate=SARS-CoV-2/human/USA/TG1170759/2022]	SKMSDVKCXSVVLLSVLQQLRVESSSKLWAQCVQLHNDILLAKDTTEAFEKMVSLLSVLLSMQGAVDINKLCEEMLDNRATLQ
WEJ55458.1:3857-3939 (98)	nsp7 [polyprotein=ORF1ab polyprotein] [organism=Severe acute respiratory syndrome coronavirus 2] [isolate=SARS-CoV-2/human/USA/NC-CDC-LC1024260/2023]	SKMSDVKCTSVVLLSVLQQLRVESSSKLWAQCVQLHNDILLAKDTTEAFEKMVSLXSVLLSMQGAVDINKLCEEMLDNRATLQ
UKP01684.1:3856-3938 (98)	nsp7 [polyprotein=ORF1ab polyprotein] [organism=Severe acute respiratory syndrome coronavirus 2] [isolate=SARS-CoV-2/human/USA/CA-CDC-QDX33117723/2022]	SKMSDVKCTSVVLLSILQQLRVESSSKLWAQCVQLHNDILLAKDTTEAFEKMVSLLSVLLSMQGAVDINKLCEEMLDNRATLQ
QJR88507.1:3860-3942 (98)	nsp7 [polyprotein=ORF1ab polyprotein] [organism=Severe acute respiratory syndrome coronavirus 2] [isolate=SARS-CoV-2/human/AUS/VIC313/2020]	SKMSDVKCTSVVLLSVLQQLRVESSSKLWAQCVQLHNDILLAKDTTEAFEKMVSLLSVLLSMQGAVXINKLCEEMLDNRATLQ
UUT02894.1:3774-3856 (98)	nsp7 [polyprotein=ORF1ab polyprotein] [organism=Severe acute respiratory syndrome coronavirus 2] [isolate=SARS-CoV-2/human/USA/C46AB49832P/2022]	SKMSDVKCTSVVLLSVLQQLRVESSSKLWAQCVQLHNDXXXAKDTTEAFEKMVSLLSVLLSMQGAVDINKLCEEMLDNRATLQ
UFY84240.1:3860-3942 (96)	nsp7 [polyprotein=ORF1ab polyprotein] [organism=Severe acute respiratory syndrome coronavirus 2] [isolate=SARS-CoV-2/human/USA/MA-CDC-ASC210485726/2021]	SKMSDVKCTSXVLLSVLQQLRVESSSKLWAQCVQLHNDILLAKDTTEAFEKMVSLLSVLLSMQGAVDINKLCEEMLDNRATLQ
USO31037.1:3854-3936 (96)	nsp7 [polyprotein=ORF1ab polyprotein] [organism=Severe acute respiratory syndrome coronavirus 2] [isolate=SARS-CoV-2/human/USA/CA-CDC-QDX37800350/2022]	SKMSDVKCTSVVLLSVLQQLRVESSSKLWAQCVQLHNDILLAKDTTEAFEKMVSLLSVLISMQGAVDINKLCEEMLDNRATLQ
UJW78558.1:3860-3942 (94)	nsp7 [polyprotein=ORF1ab polyprotein] [organism=Severe acute respiratory syndrome coronavirus 2] [isolate=SARS-CoV-2/human/USA/MI-MDHHS-SC38483/2022]	SXXXXXXXXSVVLLSVLQQLRVESSSKLWAQCVQLHNDILLAKDTTEAFEKMVSLLSVLLSMQGAVDINKLCEEMLDNRATLQ
UIB27682.1:3860-3942 (94)	nsp7 [polyprotein=ORF1ab polyprotein] [organism=Severe acute respiratory syndrome coronavirus 2] [isolate=SARS-CoV-2/human/USA/TN-CDC-ASC210632673/2021]	SKMSDVKCTSVVLLSVLQQLRVESSSKLWAQCVQLHNDILLAKDTTEAFEKMVSLLSVLLSMQCAVDINKLCEEMLDNRATLQ
UQH16278.1:3834-3916 (92)	nsp7 [polyprotein=ORF1ab polyprotein] [organism=Severe acute respiratory syndrome coronavirus 2] [isolate=SARS-CoV-2/human/USA/TG1157281/2022]	SKMSDVKCTSVVLLSVLQQLRVESSSKLWAQCVXLHNDILLAKDTTEAFEKMVSLLSVLLSMQGAVDINKLCEEMLDNRATLQ
WBE62415.1:3857-3939 (90)	nsp7 [polyprotein=ORF1ab polyprotein] [organism=Severe acute respiratory syndrome coronavirus 2] [isolate=SARS-CoV-2/human/USA/CA-CDPH-FS48102895/2022]	SKMSDVXCTSVVLLSVLQQLRVESSSKLWAQCVQLHNDILLAKDTTEAFEKMVSLLSVLLSMQGAVDINKLCEEMLDNRATLQ
UBX60727.1:3860-3942 (90)	nsp7 [polyprotein=ORF1ab polyprotein] [organism=Severe acute respiratory syndrome coronavirus 2] [isolate=SARS-CoV-2/human/USA/MN-CDC-IBX001440410506/2021]	XXMSDVXXTSVVLLSVLQQLRVESSSKLWAQCVQLHNDILLAKDTTEAFEKMVSLLSVLLSMQGAVDINKLCEEMLDNRATLQ
UHF40752.1:3860-3942 (90)	nsp7 [polyprotein=ORF1ab polyprotein] [organism=Severe acute respiratory syndrome coronavirus 2] [isolate=SARS-CoV-2/human/USA/MA-CDC-ASC210488726/2021]	SKMSDVKCTSVVLLSVLQQLRVESSSKLWAQCVQLHNDILLAKDTTEAFEKMVSLLSVLLSMQGAVDINKLCEEMLDNRATXQ
QQV40639.1:3860-3942 (90)	nsp7 [polyprotein=ORF1ab polyprotein] [organism=Severe acute respiratory syndrome coronavirus 2] [isolate=SARS-CoV-2/human/USA/UT-UPHL-2101726502/2020]	XXXXXXXXXSVVLLSVLQQLRVESSSKLWAQCIQLHNDILLAKDTTEAFEKMVSLLSVLLSMQGAVDINKLCEEMLDNRATLQ
UES62857.1:3860-3942 (90)	nsp7 [polyprotein=ORF1ab polyprotein] [organism=Severe acute respiratory syndrome coronavirus 2] [isolate=SARS-CoV-2/human/USA/NY-PV25240/2020]	SKMSDVKCTSVVLLSVLQQIRVESSSKLWAQCVQLHNDILLAKDTTEAFEKMVSLLSVLLSMQGAVDINKLCEEMLDNRATLQ
UOF30356.1:3835-3917 (88)	nsp7 [polyprotein=ORF1ab polyprotein] [organism=Severe acute respiratory syndrome coronavirus 2] [isolate=SARS-CoV-2/human/USA/MI-MDHHS-SC40191/2022]	SKMSXXXCTSVVLLSVLQQLRVESSSKLWAQCVQLHNDILLAKDTTEAFEKMVSLLSVLLSMQGAVDINKLCEEMLDNRATLQ
QRG23515.1:3860-3942 (88)	nsp7 [polyprotein=ORF1ab polyprotein] [organism=Severe acute respiratory syndrome coronavirus 2] [isolate=SARS-CoV-2/human/USA/MO-QDX-4438/2020]	SKMSDVKCTSVVLLSVLQQLRVESSSKLWAQCVQLHNDILLAKDTAEAFEKMVSLLSVLLSMQGAVDINKLCEEMLDNRATLQ
UMP30542.1:3857-3939 (88)	nsp7 [polyprotein=ORF1ab polyprotein] [organism=Severe acute respiratory syndrome coronavirus 2] [isolate=SARS-CoV-2/human/USA/NY-CDCBI-CRSP_42UKUPEKZ4PVFMUB/2022]	SXXSDVKCTSVVLLSVLQQLRVESSSKLWAQCVQLHNDILLAKDTTEAFEKMVSLLSVLLSMQGAVDINKLCEEMLDNRATLQ
QVU12251.1:3857-3939 (88)	nsp7 [polyprotein=ORF1ab polyprotein] [organism=Severe acute respiratory syndrome coronavirus 2] [isolate=SARS-CoV-2/human/USA/MO-CDC-ASC210073514/2021]	SKMSDVKCTSVVLLSVLQQLKVESSSKLWAQCVQLHNDILLAKDTTEAFEKMVSLLSVLLSMQGAVDINKLCEEMLDNRATLQ
UMC36422.1:3856-3938 (86)	nsp7 [polyprotein=ORF1ab polyprotein] [organism=Severe acute respiratory syndrome coronavirus 2] [isolate=SARS-CoV-2/human/USA/CT-CDC-LC0546206/2022]	SKMSDVKCTSVVLLSVLQQLRVESSSKVWAQCVQLHNDILLAKDTTEAFEKMVSLLSVLLSMQGAVDINKLCEEMLDNRATLQ
UMK96093.1:3856-3938 (86)	nsp7 [polyprotein=ORF1ab polyprotein] [organism=Severe acute respiratory syndrome coronavirus 2] [isolate=SARS-CoV-2/human/USA/GA-CDC-MMB14163246/2022]	SKMSDVKCTSVVLLSVLQQLRVESSSKLWAQCVQLHNDILLAKDTTEAFEKMVSLLSXLLSMQGAVDINKLCEEMLDNRATLQ
WAQ42999.1:3860-3942 (85)	nsp7 [polyprotein=ORF1ab polyprotein] [organism=Severe acute respiratory syndrome coronavirus 2] [isolate=SARS-CoV-2/human/NGA/CV2113/2021]	SKMSDVKCTSVVLLSVLQQLRVESSSKLWAQCVQXXXXXXXXXXXXXXXXXXXXXXXXXXXXXXXXXXXXXXXXXXXXXXXXX
WEI37971.1:3857-3939 (84)	nsp7 [polyprotein=ORF1ab polyprotein] [organism=Severe acute respiratory syndrome coronavirus 2] [isolate=SARS-CoV-2/human/USA/NY-CDC-LC1020269/2023]	SKMSDVKCTSVVLLSVLQQLRVESSSKLWAQCVQLHNDILLAKDTTEAFEKMVSLLSVLLSMQGAVDINKLCEEXLDNRATLQ
UEX05639.1:3860-3942 (84)	nsp7 [polyprotein=ORF1ab polyprotein] [organism=Severe acute respiratory syndrome coronavirus 2] [isolate=SARS-CoV-2/human/USA/MN-UMGC-17402/2021]	SKMSDVKCTSVVLLSVLQQLRVESSSKLWAQCVQLHNDILLAKDTTEAFEKMVSLLSVLLSMQGAVDINKLCEEMLDNGATLQ
QTC95086.1:3860-3942 (84)	nsp7 [polyprotein=ORF1ab polyprotein] [organism=Severe acute respiratory syndrome coronavirus 2] [isolate=SARS-CoV-2/human/USA/PR-CDC-LC0021235/2021]	SKMSDVKCTSVVLLSVLQQLRVESSSKLWAQCVQLHNDILLAKDTTEAFEKMVSLLSVLXSMQGAVDINKLCEEMLDNRATLQ
UQK82565.1:3857-3939 (84)	nsp7 [polyprotein=ORF1ab polyprotein] [organism=Severe acute respiratory syndrome coronavirus 2] [isolate=SARS-CoV-2/human/USA/NJ-CDC-QDX36360356/2022]	SKMSDVKCTSVVLLSVLQQLRVESSSKLWAQCVQLHNDILLAKDTTEAFEKMVSLLSVLLSMQGAVDINKLCEELLDNRATLQ
UNN41778.1:3857-3939 (82)	nsp7 [polyprotein=ORF1ab polyprotein] [organism=Severe acute respiratory syndrome coronavirus 2] [isolate=SARS-CoV-2/human/USA/WA-CDC-QDX34634375/2022]	SKVSDVKCTSVVLLSVLQQLRVESSSKLWAQCVQLHNDILLAKDTTEAFEKMVSLLSVLLSMQGAVDINKLCEEMLDNRATLQ
UJE31760.1:3860-3942 (82)	nsp7 [polyprotein=ORF1ab polyprotein] [organism=Severe acute respiratory syndrome coronavirus 2] [isolate=SARS-CoV-2/human/USA/UT-UPHL-220107826482/2021]	SKMSDVKCTSVVLLSVLQQLRVESSSKLWAQCVQLHNDILLAKDTTDAFEKMVSLLSVLLSMQGAVDINKLCEEMLDNRATLQ
UJW72526.1:3853-3935 (82)	nsp7 [polyprotein=ORF1a polyprotein] [organism=Severe acute respiratory syndrome coronavirus 2] [isolate=SARS-CoV-2/human/USA/CA-CDPH-3000297681/2022]	SKMSDVKCTSVXLLSVLQQLRVESSSKLWAQCVQLHNDILLAKDTTEAFEKMVSLLSVLLSMQGAVDINKLCEEMLDNRATLQ
USZ25388.1:3820-3902 (80)	nsp7 [polyprotein=ORF1ab polyprotein] [organism=Severe acute respiratory syndrome coronavirus 2] [isolate=SARS-CoV-2/human/USA/SC-CDC-LC0728003/2022]	SKMSDVKCTSVVLLSVLQQLRVESSSKLWAQCVQLHNDXLLAKDTTEAFEKMVSLLSVLLSMQGAVDINKLCEEMLDNRATLQ
QQV40127.1:3860-3942 (80)	nsp7 [polyprotein=ORF1ab polyprotein] [organism=Severe acute respiratory syndrome coronavirus 2] [isolate=SARS-CoV-2/human/USA/UT-UPHL-2101059613/2021]	XXXXXXXCTSVVLLSVLQQLRVESSSKLWAQCIQLHNDILLAKDTTEAFEKMVSLLSVLLSMQGAVDINKLCEEMLDNRATLQ
UAM66188.1:3859-3941 (78)	nsp7 [polyprotein=ORF1a polyprotein] [organism=Severe acute respiratory syndrome coronavirus 2] [isolate=SARS-CoV-2/human/USA/CA-CDC-FG-106622/2021]	SKMSDVKCTSVVLLSVLQQLRVESSSKLWAQCVQLHNDILLAKDTTEAFEKMVSLLSVLLSMQGAVDINKLCEEMLBNRATLQ
UWV75402.1:3854-3936 (78)	nsp7 [polyprotein=ORF1ab polyprotein] [organism=Severe acute respiratory syndrome coronavirus 2] [isolate=SARS-CoV-2/human/USA/UT-UPHL-220909846206/2022]	SKMSDVKCTSVVLLSVLQQLRVESSSKLWAQCVQLHNDILLSKDTTEAFEKMVSLLSVLLSMQGAVDINKLCEEMLDNRATLQ
UHZ12966.1:3856-3938 (76)	nsp7 [polyprotein=ORF1ab polyprotein] [organism=Severe acute respiratory syndrome coronavirus 2] [isolate=SARS-CoV-2/human/USA/TX-CDC-ASC210566824/2021]	SKMSDVKCTSVVLLSVLQQLRVESSSKLXAQCVQLHNDILLAKDTTEAFEKMVSLLSVLLSMQGAVDINKLCEEMLDNRATLQ
UIS90344.1:3860-3942 (76)	nsp7 [polyprotein=ORF1a polyprotein] [organism=Severe acute respiratory syndrome coronavirus 2] [isolate=SARS-CoV-2/human/USA/CA-CDPH-3000019585/2021]	SKMSDVKCTSXXXXXXLQQLRVESSSKLWAQCVQLHNDILLAKDTTEAFEKMVSLLSVLLSMQGAVDINKLCEEMLDNRATLQ
UNF94905.1:3856-3938 (75)	nsp7 [polyprotein=ORF1ab polyprotein] [organism=Severe acute respiratory syndrome coronavirus 2] [isolate=SARS-CoV-2/human/USA/VA-CDC-LC0559631/2022]	SKMSDVKCTSVVLLSVLQQLRVESSSKLWAQCVQLHNDILLAKDTTEAFEKMVSLLSVLLSMQGAVDISKLCEEMLDNRATLQ
QSE05829.1:3860-3942 (74)	nsp7 [polyprotein=ORF1ab polyprotein] [organism=Severe acute respiratory syndrome coronavirus 2] [isolate=SARS-CoV-2/human/USA/AR-CDC-QDX21642173/2021]	SKMSDVKCTSVVLLSVLQQLRVESSSKLWAQCVQLHNDILLAKDTTEAFEKMVSLLSVLLSMQGAVDINRLCEEMLDNRATLQ
UOT23556.1:3854-3936 (72)	nsp7 [polyprotein=ORF1ab polyprotein] [organism=Severe acute respiratory syndrome coronavirus 2] [isolate=SARS-CoV-2/human/USA/CA-CDPH-2000063863/2022]	SKMSDVKCTSVVLLSVLQQLRVESSSKLWAQCVXXXXXXXXAKDTTEAFEKMVSLLSVLLSMQGAVDINKLCEEMLDNRATLQ
USL97125.1:3857-3939 (72)	nsp7 [polyprotein=ORF1ab polyprotein] [organism=Severe acute respiratory syndrome coronavirus 2] [isolate=SARS-CoV-2/human/USA/PA-BOL-M22081122/2022]	SKMSDVKCTSVVLLSVLQQLRVESSSKLWAQCVQLHNDIXXAKDTTEAFEKMVSLLSVLLSMQGAVDINKLCEEMLDNRATLQ
UHZ93804.1:3860-3942 (72)	nsp7 [polyprotein=ORF1ab polyprotein] [organism=Severe acute respiratory syndrome coronavirus 2] [isolate=SARS-CoV-2/human/USA/CO-CDC-MMB11926453/2021]	SKMSDVKCTSVVLLSVLQQLRVESSSKLWAQCVQLHNDILLAKDATEAFEKMVSLLSVLLSMQGAVDINKLCEEMLDNRATLQ
QZJ91764.1:3860-3942 (72)	nsp7 [polyprotein=ORF1ab polyprotein] [organism=Severe acute respiratory syndrome coronavirus 2] [isolate=SARS-CoV-2/human/USA/TG707658/2021]	SKMSDVKXTSVVLLSVLQQLRVESSSKLWAQCVQLHNDILLAKDTTEAFEKMVSLLSVLLSMQGAVDINKLCEEMLDNRATLQ
UPA98630.1:3829-3911 (70)	nsp7 [polyprotein=ORF1a polyprotein] [organism=Severe acute respiratory syndrome coronavirus 2] [isolate=SARS-CoV-2/human/FRA/IHUCOVID-065887_Nova1/2022]	SKMSDVKCTSVVLLSVLQQLRVESSSKLWAQCVQLHNDILLAKDTTEAFEKMVSLLXXXXXXXXAVDINKLCEEMLDNRATLQ
UUL68694.1:3840-3922 (70)	nsp7 [polyprotein=ORF1ab polyprotein] [organism=Severe acute respiratory syndrome coronavirus 2] [isolate=SARS-CoV-2/human/FRA/2202V160853/2022]	SXMSDVKCTSVVLLSVLQQLRVESSSKLWAQCVQLHNDILLAKDTTEAFEKMVSLLSVLLSMQGAVDINKLCEEMLDNRATLQ
UPV67322.1:3857-3939 (70)	nsp7 [polyprotein=ORF1ab polyprotein] [organism=Severe acute respiratory syndrome coronavirus 2] [isolate=SARS-CoV-2/human/USA/CO-CDPHE-2103115790/2022]	SKMSDVKCTSVVLLSVLQQLRVESSSKLWAQCVQLHNDILLAKDTTEAFEKMVSLLSVLLSMQGAVDINKLCEEMLDXRATLQ
UBT94795.1:3860-3942 (70)	nsp7 [polyprotein=ORF1ab polyprotein] [organism=Severe acute respiratory syndrome coronavirus 2] [isolate=SARS-CoV-2/human/USA/VT-CDCBI-CRSP_AA7PT3V357INT4KY/2021]	SKMSDVKCTSVVLLSVLQQLRVESSSKLWAQCVQLHNDIVLAKDTTEAFEKMVSLLSVLLSMQGAVDINKLCEEMLDNRATLQ
UEC30880.1:3860-3942 (69)	nsp7 [polyprotein=ORF1ab polyprotein] [organism=Severe acute respiratory syndrome coronavirus 2] [isolate=SARS-CoV-2/human/USA/AZ-ASU18042/2021]	SKMSDVKCTSVVLLSVLQQLRVESSSKLWAQCVQLHNDILLAKDTTEAFEKMVSLLSVLLXXXXXXXXXXXXXXXXXXXXXXX
URF38868.1:3856-3938 (68)	nsp7 [polyprotein=ORF1ab polyprotein] [organism=Severe acute respiratory syndrome coronavirus 2] [isolate=SARS-CoV-2/human/USA/VA-VTVAS3-GSC34040/2021]	SKMSDVKCTSVVLLSVLQQLRVESSSKLWAQCVQLHNDILLAKDTTEAFEKMVSLLSVLLSMQSAVDINKLCEEMLDNRATLQ
UGV68896.1:3860-3942 (68)	nsp7 [polyprotein=ORF1a polyprotein] [organism=Severe acute respiratory syndrome coronavirus 2] [isolate=SARS-CoV-2/human/USA/CA-CDPH-3000275431/2021]	SKMSDVKCTXXXXXXXLQQLRVESSSKLWAQCVQLHNDILLAKDTTEAFEKMVSLLSVLLSMQGAVDINKLCEEMLDNRATLQ
UEU81279.1:3860-3942 (68)	nsp7 [polyprotein=ORF1ab polyprotein] [organism=Severe acute respiratory syndrome coronavirus 2] [isolate=SARS-CoV-2/human/USA/CO-CDC-MMB11147224/2021]	SKMSDVKCTSVVLLSVLQQLRVESSSKLWAQCVQLHNDILLAKDTTEAFEKMVSXXXXXXXXXXAVDINKLCEEMLDNRATLQ
QNO87525.1:3860-3942 (68)	nsp7 [polyprotein=ORF1ab polyprotein] [organism=Severe acute respiratory syndrome coronavirus 2] [isolate=SARS-CoV-2/human/AUS/VIC5837/2020]	SKMSDVKCTSVVLLSVLQQLRVESSSKLWDQCVQLHNDILLAKDTTEAFEKMVSLLSVLLSMQGAVDINKLCEEMLDNRATLQ
QOW85428.1:3835-3917 (66)	nsp7 [polyprotein=ORF1ab polyprotein] [organism=Severe acute respiratory syndrome coronavirus 2] [isolate=SARS-CoV-2/human/USA/FL-BPHL-1836/2020]	SKMSDVKCTSVVLLSVLQQLRVESSSKLWAQCVQLHNDILLAKDTTEAFEKMVSLLSVFLSMQGAVDINKLCEEMLDNRATLQ
UBP14965.1:3860-3942 (66)	nsp7 [polyprotein=ORF1a polyprotein] [organism=Severe acute respiratory syndrome coronavirus 2] [isolate=SARS-CoV-2/human/USA/MS-CDC-ASC210178527/2021]	SKMSDVKCTSVVLLSVLQQLRVESSSKLWAQCVQLHNDILLAKXTTEAFEKMVSLLSVLLSMQGAVDINKLCEEMLDNRATLQ
WEX72651.1:3850-3932 (66)	nsp7 [polyprotein=ORF1ab polyprotein] [organism=Severe acute respiratory syndrome coronavirus 2] [isolate=SARS-CoV-2/human/USA/MD-MDH-8327/2023]	XXXXXXXXXXXXXXXXXXXXXVESSSKLWAQCVQLHNDILLAKDTTEAFEKMVSLLSVLLSMQGAVDINKLCEEMLDNRATLQ
UQR29416.1:3860-3942 (66)	nsp7 [polyprotein=ORF1ab polyprotein] [organism=Severe acute respiratory syndrome coronavirus 2] [isolate=SARS-CoV-2/human/USA/TG1004622/2021]	SKMSDVKCTSVVLLSVLQQLRVESSSKLWAQCXQLHNDILLAKDTTEAFEKMVSLLSVLLSMQGAVDINKLCEEMLDNRATLQ
WBQ59269.1:3856-3938 (66)	nsp7 [polyprotein=ORF1ab polyprotein] [organism=Severe acute respiratory syndrome coronavirus 2] [isolate=SARS-CoV-2/human/USA/WI-UW-9647/2022]	SKMSDVKCTSVVLLSVLQQLRVESSXXXXXXXXXXXXXXXXXXXXXXXXXXXXXXXXXXXXXXXXXXXXXXXXXXXXXXXXXX
UIC01093.1:3860-3942 (64)	nsp7 [polyprotein=ORF1a polyprotein] [organism=Severe acute respiratory syndrome coronavirus 2] [isolate=SARS-CoV-2/human/USA/CA-CDPH-3000283671/2021]	XXXXXXXXXXXXXXXVLQQLRVESSSKLWAQCVQLHNDILLAKDTTEAFEKMVSLLSVLLSMQGAVDINKLCEEMLDNRATLQ
UBX73298.1:3860-3942 (64)	nsp7 [polyprotein=ORF1ab polyprotein] [organism=Severe acute respiratory syndrome coronavirus 2] [isolate=SARS-CoV-2/human/USA/GA-CDC-MMB10140399/2021]	SKMSDVKCTSVVLLSVLQQLRVESSSXXXXXXXXXXXDILLAKDTTEAFEKMVSLLSVLLSMQGAVDINKLCEEMLDNRATLQ
UCR24534.1:3860-3942 (62)	nsp7 [polyprotein=ORF1ab polyprotein] [organism=Severe acute respiratory syndrome coronavirus 2] [isolate=SARS-CoV-2/human/USA/CA-CDC-ASC210131607/2021]	SKMSDVKCTSVVLLSVLQQLRVESSSKLWAQCVQLHNDILLAKDTTEAFEKMVSLLSVLLSMQGAVDINKLCEEMLDNRXXXX
UEH12628.1:3860-3942 (62)	nsp7 [polyprotein=ORF1ab polyprotein] [organism=Severe acute respiratory syndrome coronavirus 2] [isolate=SARS-CoV-2/human/USA/CA-CDPH-3000239425/2021]	SKMSDVKCTSVVLLSVLQQLRVESSSKLWAHCVQLHNDILLAKDTTEAFEKMVSLLSVLLSMQGAVDINKLCEEMLDNRATLQ
UBU60463.1:3728-3810 (62)	nsp7 [polyprotein=ORF1ab polyprotein] [organism=Severe acute respiratory syndrome coronavirus 2] [isolate=SARS-CoV-2/human/IND/537MN908947.3/2021]	SKMSDVKCTSVVLLSVLQQLRVXXXXXXXXXXXXXXXXXXXXXXXXXXXXXXXXXXXXXXXXXXXXXXXXXXXXXXXXXXXXX
QNA40324.1:3860-3942 (60)	nsp7 [polyprotein=ORF1ab polyprotein] [organism=Severe acute respiratory syndrome coronavirus 2] [isolate=SARS-CoV-2/human/USA/MA-MGH-01387/2020]	SKMSDVKCTSVVLLSVLQQLRVESSSKLWAQCVQLHNDILLAKDTTEAFEKMVSLLSVLLSMQGAVDINKLCEEMXDNRATLQ
WBE05402.1:3856-3938 (60)	nsp7 [polyprotein=ORF1a polyprotein] [organism=Severe acute respiratory syndrome coronavirus 2] [isolate=SARS-CoV-2/human/USA/CA-CDPH-3000318381/2022]	SKMSDVKCTSVVLLXVLQQLRVESSSKLWAQCVQLHNDILLAKDTTEAFEKMVSLLSVLLSMQGAVDINKLCEEMLDNRATLQ
WAQ42975.1:3860-3942 (60)	nsp7 [polyprotein=ORF1ab polyprotein] [organism=Severe acute respiratory syndrome coronavirus 2] [isolate=SARS-CoV-2/human/NGA/CV2105/2021]	SKMSDVKCTSVVLLSVLQQLRVESSSKLWAQCVQLXXXXXXXXXXXXXXXXXXXXXXXXXXXXXXXXXXXXXXXXXXXXXXXX
UCO73129.1:3860-3942 (58)	nsp7 [polyprotein=ORF1ab polyprotein] [organism=Severe acute respiratory syndrome coronavirus 2] [isolate=SARS-CoV-2/human/USA/WI-CDC-ASC210285816/2021]	XXMSDVKCTSVVLLSVLQQLRVESSSKLWAQCVQLHNDILLAKDTTEAFEKMVSLLSVLLSMQGAVDINKLCEEMLDNRATLQ
QVH25962.1:3860-3942 (58)	nsp7 [polyprotein=ORF1ab polyprotein] [organism=Severe acute respiratory syndrome coronavirus 2] [isolate=SARS-CoV-2/human/USA/FL-CDC-ASC210033669/2021]	SKMSDVKCTSVVLLSVLQQLRVESSSKLWAQCVQLHNDILLAKDTTEAFDKMVSLLSVLLSMQGAVDINKLCEEMLDNRATLQ
UXG45747.1:3856-3938 (58)	nsp7 [polyprotein=ORF1ab polyprotein] [organism=Severe acute respiratory syndrome coronavirus 2] [isolate=SARS-CoV-2/human/USA/LA-PHL-LAPH000400/2022]	SKMSDVKCTSVVLLSVLQQLRVESSSKLWAQCVQLHNDILLAKDTTEAFEKMVSLLSVLLSMQGAVDINKLCEEMXXXXXXXQ
UCN32540.1:3860-3942 (58)	nsp7 [polyprotein=ORF1ab polyprotein] [organism=Severe acute respiratory syndrome coronavirus 2] [isolate=SARS-CoV-2/human/USA/MO-CDC-LC0294686/2021]	SKMSDVKCTSVVLLSVLQQLRVESSSKLWAQCVQLHNDILVAKDTTEAFEKMVSLLSVLLSMQGAVDINKLCEEMLDNRATLQ
UYL38212.1:3827-3909 (58)	nsp7 [polyprotein=ORF1ab polyprotein] [organism=Severe acute respiratory syndrome coronavirus 2] [isolate=SARS-CoV-2/human/USA/FL-BPHL-13741/2022]	SKMSDVKCTSVVLLSVLQQLRVXXXXXXXXXXXXXXXXXXXAKDTTEAFEKMVSLLSVLLSMQGAVDINKLCEEMLDNRATLQ
UDK43217.1:3860-3942 (56)	nsp7 [polyprotein=ORF1ab polyprotein] [organism=Severe acute respiratory syndrome coronavirus 2] [isolate=SARS-CoV-2/human/USA/OH-CDC-MMB10664563/2021]	SKMSDVKCTSVVLLSVLQQLRVESSSKLWAQCVQLHNDILLAKDTTESFEKMVSLLSVLLSMQGAVDINKLCEEMLDNRATLQ
UGC70369.1:3860-3942 (54)	nsp7 [polyprotein=ORF1a polyprotein] [organism=Severe acute respiratory syndrome coronavirus 2] [isolate=SARS-CoV-2/human/USA/FL-CDC-ASC210456257/2021]	SKMSDVKCTSXXLLSVLQQLRVESSSKLWAQCVQLHNDILLAKDTTEAFEKMVSLLSVLLSMQGAVDINKLCEEMLDNRATLQ
WAD96259.1:3857-3939 (54)	nsp7 [polyprotein=ORF1ab polyprotein] [organism=Severe acute respiratory syndrome coronavirus 2] [isolate=SARS-CoV-2/human/USA/MN-CDC-QDX43797326/2022]	SNMSDVKCTSVVLLSVLQQLRVESSSKLWAQCVQLHNDILLAKDTTEAFEKMVSLLSVLLSMQGAVDINKLCEEMLDNRATLQ
UQF05024.1:3860-3942 (54)	nsp7 [polyprotein=ORF1ab polyprotein] [organism=Severe acute respiratory syndrome coronavirus 2] [isolate=SARS-CoV-2/human/VNM/HCMC_548/2021]	SKMSDVKCTSVVLLSVLQQLRVESSSKLWAQCVQLHNDILLAKDTTEAFEKMVSLLSVLLSMQGAVDINKLCEDMLDNRATLQ
UEY75826.1:3860-3942 (54)	nsp7 [polyprotein=ORF1ab polyprotein] [organism=Severe acute respiratory syndrome coronavirus 2] [isolate=SARS-CoV-2/human/USA/PA-CDC-STM-000720951/2021]	SKMSDVKCTSVVLLSVLQQLRVESSSKLWAQCVQLHNDILLAKDTTEAFEKMASLLSVLLSMQGAVDINKLCEEMLDNRATLQ
UGL72480.1:3860-3942 (54)	nsp7 [polyprotein=ORF1ab polyprotein] [organism=Severe acute respiratory syndrome coronavirus 2] [isolate=SARS-CoV-2/human/USA/OKPHLCOV0003077/2021]	SKMSDVKCTSVVLLSVLQQLRVESSSKLWAQCVQLHNDILLAKDTTEAFEKMVSLLSVLLSMQGAVDLNKLCEEMLDNRATLQ
QUL64909.1:3857-3939 (54)	nsp7 [polyprotein=ORF1ab polyprotein] [organism=Severe acute respiratory syndrome coronavirus 2] [isolate=SARS-CoV-2/human/USA/MA-CDCBI-CRSP_H356Q7LK7A3WIT2R/2021]	XXXXXXXCTSVVLLSVLQQLRVESSSKLWAQCVQLHNDILLAKDTTEAFEKMVSLFSVLLSMQGAVDINKLCEEMLDNRATLQ
UET49494.1:3860-3942 (54)	nsp7 [polyprotein=ORF1a polyprotein] [organism=Severe acute respiratory syndrome coronavirus 2] [isolate=SARS-CoV-2/human/USA/UT-CDC-ASC210497594/2021]	SKMSDVKCTSVVLLSVLQQLRVESSSKLWAQCVQLHNDILLAKDTTEAFEKMVSLLSVLLSMQGAVDINKLCEEMLDNRAXXQ
QQL91342.1:3860-3942 (53)	nsp7 [polyprotein=ORF1ab polyprotein] [organism=Severe acute respiratory syndrome coronavirus 2] [isolate=SARS-CoV-2/human/USA/UT-UPHL-2012959648/2020]	SKMSDVKCTSVVLLSVLQQLRVESSSKLWAQCXXXXXXXXXXXXXXXXXXXXXXXXXXXXXXXXXXXXXXXXXXXXXXXXXXX
QPG84414.1:3840-3922 (52)	nsp7 [polyprotein=ORF1ab polyprotein] [organism=Severe acute respiratory syndrome coronavirus 2] [isolate=SARS-CoV-2/human/USA/FL-BPHL-2185/2020]	XXXXXXXXXSVVLLSVLQQLRVESLSKLWAQCVQLHNDILLAKDTTEAFEKMVSLLSVLLSMQGAVDINKLCEEMLDNRATLQ
UFA79059.1:3860-3942 (52)	nsp7 [polyprotein=ORF1ab polyprotein] [organism=Severe acute respiratory syndrome coronavirus 2] [isolate=SARS-CoV-2/human/USA/CA-CDPH-3000260715/2021]	SKMSDVKCTSVVLLSVLQQLRVESSYKLWAQCVQLHNDILLAKDTTEAFEKMVSLLSVLLSMQGAVDINKLCEEMLDNRATLQ
UGX51839.1:3860-3942 (52)	nsp7 [polyprotein=ORF1ab polyprotein] [organism=Severe acute respiratory syndrome coronavirus 2] [isolate=SARS-CoV-2/human/USA/MO-CDC-ASC210488052/2021]	SKMSDVKCTSVVLLSVLQQLRVESSSKLWXQCVQLHNDILLAKDTTEAFEKMVSLLSVLLSMQGAVDINKLCEEMLDNRATLQ
QUA77138.1:3857-3939 (52)	nsp7 [polyprotein=ORF1ab polyprotein] [organism=Severe acute respiratory syndrome coronavirus 2] [isolate=SARS-CoV-2/human/USA/MA-CDC-ASC210048056/2021]	SKMSDVKCTSVVLLSVLQQLRVESSSKLWAQCVQLHNDILLAKDTTEAFEKMVSLLSVLLSMQGAVYINKLCEEMLDNRATLQ
UDW75124.1:3860-3942 (52)	nsp7 [polyprotein=ORF1a polyprotein] [organism=Severe acute respiratory syndrome coronavirus 2] [isolate=SARS-CoV-2/human/USA/CO-CDPHE-2101643168/2021]	SXXXXXXXXXXXXXXXLQQLRVESSSKLWAQCVQLHNDILLAKDTTEAFEKMVSLLSVLLSMQGAVDINKLCEEMLDNRATLQ
UIO26200.1:3860-3942 (52)	nsp7 [polyprotein=ORF1ab polyprotein] [organism=Severe acute respiratory syndrome coronavirus 2] [isolate=SARS-CoV-2/human/USA/TN-CDC-ASC210639228/2021]	SKMSDVKCTSVVLLSVLQQLRVESSSKLWAQCVQLHNDILLAKDXTEAFEKMVSLLSVLLSMQGAVDINKLCEEMLDNRATLQ
QOL23059.1:3860-3942 (52)	nsp7 [polyprotein=ORF1ab polyprotein] [organism=Severe acute respiratory syndrome coronavirus 2] [isolate=SARS-CoV-2/human/USA/WI-CDC-3852833-001/2020]	SKMSDVKCTSVVLLSVLQQLRVESSAKLWAQCVQLHNDILLAKDTTEAFEKMVSLLSVLLSMQGAVDINKLCEEMLDNRATLQ
UKM30222.1:3860-3942 (50)	nsp7 [polyprotein=ORF1ab polyprotein] [organism=Severe acute respiratory syndrome coronavirus 2] [isolate=SARS-CoV-2/human/USA/MI-MDHHS-SC38965/2022]	XXXXXXXXXXXXLLSVLQQLRVESSSKLWAQCVQLHNDILLAKDTTEAFEKMVSLLSVLLSMQGAVDINKLCEEMLDNRATLQ
UDE19196.1:3834-3916 (50)	nsp7 [polyprotein=ORF1ab polyprotein] [organism=Severe acute respiratory syndrome coronavirus 2] [isolate=SARS-CoV-2/human/USA/CO-CDPHE-2005201426/2020]	SKMSXXXXXXXXXXXXLQQLRVESSSKLWAQCVQLHNDILLAKDTTEAFEKMVSLLSVLLSMQGAVDINKLCEEMLDNRATLQ
UEU14270.1:3860-3942 (50)	nsp7 [polyprotein=ORF1ab polyprotein] [organism=Severe acute respiratory syndrome coronavirus 2] [isolate=SARS-CoV-2/human/USA/VA-CDC-LC0359702/2021]	SKMSYVKCTSVVLLSVLQQLRVESSSKLWAQCVQLHNDILLAKDTTEAFEKMVSLLSVLLSMQGAVDINKLCEEMLDNRATLQ
URX49664.1:3857-3939 (50)	nsp7 [polyprotein=ORF1ab polyprotein] [organism=Severe acute respiratory syndrome coronavirus 2] [isolate=SARS-CoV-2/human/USA/CO-CDPHE-2103234172/2022]	SKMSDVKCTSVVLLSVLQQLRVESSSKLWAQCVQLYNDILLAKDTTEAFEKMVSLLSVLLSMQGAVDINKLCEEMLDNRATLQ
WEW87356.1:3857-3939 (50)	nsp7 [polyprotein=ORF1ab polyprotein] [organism=Severe acute respiratory syndrome coronavirus 2] [isolate=SARS-CoV-2/human/USA/NJ-CDC-QDX47869824/2023]	SKMSDVKCTSVVLLSVLQQLRVESSSKLWAQCVQLHNDILLAKDTTEAFEKMVSLLSVLLSMQGAVDINKLCEEMLDNRSTLQ
WCF38285.1:3860-3942 (48)	nsp7 [polyprotein=ORF1ab polyprotein] [organism=Severe acute respiratory syndrome coronavirus 2] [isolate=SARS-CoV-2/human/USA/OKPHL0025319/2021]	SKMSDVKCTSVVLLSVLQQLRVESSSKLWAQCVQLHNDILLAKDNTEAFEKMVSLLSVLLSMQGAVDINKLCEEMLDNRATLQ
UET18890.1:3861-3943 (48)	nsp7 [polyprotein=ORF1ab polyprotein] [organism=Severe acute respiratory syndrome coronavirus 2] [isolate=SARS-CoV-2/human/USA/TX-CDC-ASC210490946/2021]	SKMSDVKCTSVVLLSVLQQLRVESSSKLWAQCVQLHNDILLXKDTTEAFEKMVSLLSVLLSMQGAVDINKLCEEMLDNRATLQ
UBY29426.1:3860-3942 (48)	nsp7 [polyprotein=ORF1a polyprotein] [organism=Severe acute respiratory syndrome coronavirus 2] [isolate=SARS-CoV-2/human/USA/CO-CDPHE-2101643159/2021]	SKXXXXXXXXXXXXXXLQQLRVESSSKLWAQCVQLHNDILLAKDTTEAFEKMVSLLSVLLSMQGAVDINKLCEEMLDNRATLQ
UEM45798.1:3860-3942 (48)	nsp7 [polyprotein=ORF1ab polyprotein] [organism=Severe acute respiratory syndrome coronavirus 2] [isolate=SARS-CoV-2/human/USA/WA-UW-21100955139/2021]	SKMSDVKCTSVVLLSVLQQLRVESSSKLWAQCVQLHNDILLAKDTTEAFEKMVSLLFVLLSMQGAVDINKLCEEMLDNRATLQ
UAJ82898.1:3860-3942 (48)	nsp7 [polyprotein=ORF1ab polyprotein] [organism=Severe acute respiratory syndrome coronavirus 2] [isolate=SARS-CoV-2/human/USA/NMDOH-2021151928/2021]	XXXXXXXXXXXXXXXXXXXLRVESSSKLWAQCVQLHNDILLAKDTTEAFEKMVSLLSVLLSMQGAVDINKLCEEMLDNRATLQ
UPZ63210.1:3728-3810 (47)	nsp7 [polyprotein=ORF1ab polyprotein] [organism=Severe acute respiratory syndrome coronavirus 2] [isolate=SARS-CoV-2/human/FRA/IHUCOVID-037930-Nova1M/2020]	SKMSDVKCTSVVLLSVLQQLRVESSSKLWAQXXXXXXXXXXXXXXXXXXXXXXXXXXXXXXXXXXXXXXXXXXXXXXXXXXXX
UWI54870.1:3827-3909 (46)	nsp7 [polyprotein=ORF1ab polyprotein] [organism=Severe acute respiratory syndrome coronavirus 2] [isolate=SARS-CoV-2/human/USA/CA-OC-3770B/2022]	SKMSDVKCTSVVLLSVLQQLRVEXXXXXXXXXXXXXXXXXXAKDTTEAFEKMVSLLSVLLSMQGAVDINKLCEEMLDNRATLQ
UCX47228.1:3860-3942 (46)	nsp7 [polyprotein=ORF1ab polyprotein] [organism=Severe acute respiratory syndrome coronavirus 2] [isolate=SARS-CoV-2/human/USA/NJ-PHEL-V21016311/2021]	SKMSDVKCTSVVLLSVLQQLRVESSSKLWAQCVQLHNDILLAKDTTEAFEKMVSLLSVLLSMQGAVDINKLCEEMLDNRXTLQ
QTD21957.1:3860-3942 (46)	nsp7 [polyprotein=ORF1ab polyprotein] [organism=Severe acute respiratory syndrome coronavirus 2] [isolate=SARS-CoV-2/human/USA/MA-CDC-QDX22634910/2021]	SKMSDVKCTSVVLLSVLQQLRVEASSKLWAQCVQLHNDILLAKDTTEAFEKMVSLLSVLLSMQGAVDINKLCEEMLDNRATLQ
UFP20949.1:3860-3942 (46)	nsp7 [polyprotein=ORF1ab polyprotein] [organism=Severe acute respiratory syndrome coronavirus 2] [isolate=SARS-CoV-2/human/USA/MI-CDC-STM-VJRDX2SFC/2021]	SKMSDVKCTSVVLLSVLQQLRVESSSKLWAQCVQLHNDILLAKDTTEAFEKMVSLLSVLLSMQGAVDINKICEEMLDNRATLQ
ULL39576.1:3856-3938 (45)	nsp7 [polyprotein=ORF1ab polyprotein] [organism=Severe acute respiratory syndrome coronavirus 2] [isolate=SARS-CoV-2/human/USA/AZ-2022-0575/2022]	SKMSDVKCTSVVLLSVLQQLRVESSSKLWAQCVQLHNDILLAKDTTEAFEKMVSLXXXXXXXXXXXXXXXXXXXXXXXXXXXX
QSM29579.1:3860-3942 (44)	nsp7 [polyprotein=ORF1ab polyprotein] [organism=Severe acute respiratory syndrome coronavirus 2] [isolate=SARS-CoV-2/human/USA/CA-CZB-23355/2021]	SKMSDVKCTSVVLLSVLQQLRVESSSKLWAQCVQLHNDILLAKDTTEAFEKMVSLLSVLLSMQGAVDINKLCEEMLDDRATLQ
QSN79855.1:3860-3942 (44)	nsp7 [polyprotein=ORF1ab polyprotein] [organism=Severe acute respiratory syndrome coronavirus 2] [isolate=SARS-CoV-2/human/USA/FL-CDC-LC0015870/2021]	SKMSDVKCTSVVLLSVLQQLRAESSSKLWAQCVQLHNDILLAKDTTEAFEKMVSLLSVLLSMQGAVDINKLCEEMLDNRATLQ
QTE05277.1:3860-3942 (44)	nsp7 [polyprotein=ORF1ab polyprotein] [organism=Severe acute respiratory syndrome coronavirus 2] [isolate=SARS-CoV-2/human/USA/UT-UPHL-2103658756/2021]	SKMSDVKCTSAVLLSVLQQLRVESSSKLWAQCVQLHNDILLAKDTTEAFEKMVSLLSVLLSMQGAVDINKLCEEMLDNRATLQ
UIB95702.1:3860-3942 (44)	nsp7 [polyprotein=ORF1ab polyprotein] [organism=Severe acute respiratory syndrome coronavirus 2] [isolate=SARS-CoV-2/human/USA/CA-CDPH-3000283289/2021]	XXXXDVKCTSVVLLSVLQQLRVESSSKLWAQCVQLHNDILLAKDTTEAFEKMVSLLSVLLSMQGAVDINKLCEEMLDNRATLQ
WBG58921.1:3857-3939 (44)	nsp7 [polyprotein=ORF1ab polyprotein] [organism=Severe acute respiratory syndrome coronavirus 2] [isolate=SARS-CoV-2/human/USA/WI-UW-13825/2022]	SKMSDVKCTSVVLLSVLQQLRVESXXXXXXXXXXXXXXXXXXXXXXXXXXXXXXXXXXXXXXXXXXXXXXXXXXXXXXXXXXX
UQH26278.1:3860-3942 (44)	nsp7 [polyprotein=ORF1a polyprotein] [organism=Severe acute respiratory syndrome coronavirus 2] [isolate=SARS-CoV-2/human/USA/TG1110204/2021]	SKMSDVKCTSVVLLSVLQQLRVESSSKXWAQCVQLHNDILLAKDTTEAFEKMVSLLSVLLSMQGAVDINKLCEEMLDNRATLQ
UJO64908.1:3856-3938 (44)	nsp7 [polyprotein=ORF1ab polyprotein] [organism=Severe acute respiratory syndrome coronavirus 2] [isolate=SARS-CoV-2/human/USA/NJ-CDC-LC0471497/2022]	SKMSDVKCTSVVLLSVLQQLRVESSSKLWAQCVQLHNDILLAKDTTEAFEKMVSLLSVLLSMKGAVDINKLCEEMLDNRATLQ
UYX70031.1:3860-3942 (44)	nsp7 [polyprotein=ORF1ab polyprotein] [organism=Severe acute respiratory syndrome coronavirus 2] [isolate=SARS-CoV-2/human/USA/AK-PHL23109/2020]	SKMSDVKCTSVVLLSVLQQLRVESSSKLWAXCVQLHNDILLAKDTTEAFEKMVSLLSVLLSMQGAVDINKLCEEMLDNRATLQ
UUH55493.1:3856-3938 (44)	nsp7 [polyprotein=ORF1ab polyprotein] [organism=Severe acute respiratory syndrome coronavirus 2] [isolate=SARS-CoV-2/human/PER/5064/2020]	SKMSDVKCTSVVLLSVLQQLRVESSSKLWAQCVQXXXXXXXAKDTTEAFEKMVSLLSVLLSMQGAVDINKLCEEMLDNRATLQ
UXU20702.1:3857-3939 (44)	nsp7 [polyprotein=ORF1ab polyprotein] [organism=Severe acute respiratory syndrome coronavirus 2] [isolate=SARS-CoV-2/human/GMB/18688/2021]	SKMSDVKCTSVVLLSVLQQLRVESSSKLWAQCVQLHNDILLAKDTTEAFEKMVSLLSVLLSMQRAVDINKLCEEMLDNRATLQ
QTD27511.1:3857-3939 (44)	nsp7 [polyprotein=ORF1ab polyprotein] [organism=Severe acute respiratory syndrome coronavirus 2] [isolate=SARS-CoV-2/human/USA/VA-CDC-LC0020068/2021]	SKMSDVKCTSIVLLSVLQQLRVESSSKLWAQCVQLHNDILLAKDTTEAFEKMVSLLSVLLSMQGAVDINKLCEEMLDNRATLQ
UJY84823.1:3857-3939 (44)	nsp7 [polyprotein=ORF1ab polyprotein] [organism=Severe acute respiratory syndrome coronavirus 2] [isolate=SARS-CoV-2/human/USA/UT-UPHL-220121162432/2022]	SKMLDVKCTSVVLLSVLQQLRVESSSKLWAQCVQLHNDILLAKDTTEAFEKMVSLLSVLLSMQGAVDINKLCEEMLDNRATLQ
UVD11779.1:3857-3939 (44)	nsp7 [polyprotein=ORF1ab polyprotein] [organism=Severe acute respiratory syndrome coronavirus 2] [isolate=SARS-CoV-2/human/USA/IA-CDC-STM-BJHVSAUBG/2022]	SKMSDVKCTSVVLLSVLQQLRVESSSKLWAQCVKLHNDILLAKDTTEAFEKMVSLLSVLLSMQGAVDINKLCEEMLDNRATLQ
UIC83399.1:3860-3942 (42)	nsp7 [polyprotein=ORF1ab polyprotein] [organism=Severe acute respiratory syndrome coronavirus 2] [isolate=SARS-CoV-2/human/USA/WA-CDC-QDX32105000/2021]	SKMSDVKCTSVVLLSVLQQLRVESSSNLWAQCVQLHNDILLAKDTTEAFEKMVSLLSVLLSMQGAVDINKLCEEMLDNRATLQ
UGN68027.1:3860-3942 (42)	nsp7 [polyprotein=ORF1ab polyprotein] [organism=Severe acute respiratory syndrome coronavirus 2] [isolate=SARS-CoV-2/human/USA/MI-MDHHS-SC32585/2021]	SKMSDVKXXSVVLLSVLQQLRVESSSKLWAQCVQLHNDILLAKDTTEAFEKMVSLLSVLLSMQGAVDINKLCEEMLDNRATLQ
QTF83385.1:3860-3942 (42)	nsp7 [polyprotein=ORF1ab polyprotein] [organism=Severe acute respiratory syndrome coronavirus 2] [isolate=SARS-CoV-2/human/USA/NM-CDC-QDX22786655/2021]	SKMSDVKCTSVVLLSVLQQLRVESSSKLWAQCIQLHNDILLAKDTTEAFEKMVSLLSVLLSMQGAVDINKFCEEMLDNRATLQ
QWC76817.1:3860-3942 (42)	nsp7 [polyprotein=ORF1ab polyprotein] [organism=Severe acute respiratory syndrome coronavirus 2] [isolate=SARS-CoV-2/human/NZL/20VR1285/2020]	SKMSDVKCTSVVLLSVLQQLRVESSSKLWAQCVQLHNDILLAKDTTEAFEKMVSLLSVLLSMQGAVDXNKLCEEMLDNRATLQ
QZU27504.1:3860-3942 (42)	nsp7 [polyprotein=ORF1ab polyprotein] [organism=Severe acute respiratory syndrome coronavirus 2] [isolate=SARS-CoV-2/human/USA/NC-CDC-ASC210205106/2021]	XXMSDVXCTSVVLLSVLQQLRVESSSKLWAQCVQLHNDILLAKDTTEAFEKMVSLLSVLLSMQGAVDINKLCEEMLDNRATLQ
UMQ87354.1:3860-3942 (42)	nsp7 [polyprotein=ORF1ab polyprotein] [organism=Severe acute respiratory syndrome coronavirus 2] [isolate=SARS-CoV-2/human/USA/TN-VUMC-O-0622/2021]	SKMSDVKCTSVVLLSVLQQLRVESSSKLWAQCVQLHNDILLAKDTTEAFEKMVSLLSVLLSMQGAVDINKLCEEMXXXXXXLQ
UJW72845.1:3856-3938 (42)	nsp7 [polyprotein=ORF1a polyprotein] [organism=Severe acute respiratory syndrome coronavirus 2] [isolate=SARS-CoV-2/human/USA/CA-CDPH-3000299822/2022]	XXXXXXXXXXXXXLSVLQQLRVESSSKLWAQCVQLHNDILLAKDTTEAFEKMVSLLSVLLSMQGAVDINKLCEEMLDNRATLQ
QYF51190.1:3857-3939 (40)	nsp7 [polyprotein=ORF1ab polyprotein] [organism=Severe acute respiratory syndrome coronavirus 2] [isolate=SARS-CoV-2/human/USA/CUIMC-NP-5678/2021]	SKMSDVKCTSVVLLSVLQQLRVESSSKLWAQCVQLHNDTLLAKDTTEAFEKMVSLLSVLLSMRGAVDINKLCEEMLDNRATLQ
UYD93219.1:3857-3939 (40)	nsp7 [polyprotein=ORF1ab polyprotein] [organism=Severe acute respiratory syndrome coronavirus 2] [isolate=SARS-CoV-2/human/NZL/22MV2182/2022]	SKMSDVKCTSVVLLSVLQQLRVESSSKLWAQCVQLHNDILLAKDTTXAFEKMVSLLSVLLSMQGAVDINKLCEEMLDNRATLQ
UEZ93604.1:3860-3942 (40)	nsp7 [polyprotein=ORF1ab polyprotein] [organism=Severe acute respiratory syndrome coronavirus 2] [isolate=SARS-CoV-2/human/USA/UT-UPHL-211109024072/2021]	SKMSDVKCTSVVLLSVLQQLRVESSSKLWAQCVQLHNDILLAKDTTEAFERMVSLLSALLSMQGAVDINKLCEEMLDNRATLQ
WAP76886.1:3856-3938 (40)	nsp7 [polyprotein=ORF1ab polyprotein] [organism=Severe acute respiratory syndrome coronavirus 2] [isolate=SARS-CoV-2/human/USA/DE-DHSS-B1177902/2022]	SKMSDVKCTSVVLLSVLQQLRVESSSKLWAQCVQLHNDILLAKDTTEAFEKMVSLLSVLLSMQGAXDINKLCEEMLDNRATLQ
UJI81183.1:3856-3938 (40)	nsp7 [polyprotein=ORF1ab polyprotein] [organism=Severe acute respiratory syndrome coronavirus 2] [isolate=SARS-CoV-2/human/USA/CA-CDC-FG-234176/2022]	SKMSDVKCTSVVLLSVLQQLRVESSSKLWAQCSQLHNDILLAKDTTEAFEKMVSLLSVLLSMQGAVDINKLCEEMLDNRATLQ
UZY68085.1:3857-3939 (40)	nsp7 [polyprotein=ORF1ab polyprotein] [organism=Severe acute respiratory syndrome coronavirus 2] [isolate=SARS-CoV-2/human/USA/CA-CDC-STM-AFZUJVJGW/2022]	SKMSDXKCTSVVLLSVLQQLRVESSSKLWAQCVQLHNDILLAKDTTEAFEKMVSLLSVLLSMQGAVDINKLCEEMLDNRATLQ
QLC48062.1:3860-3942 (38)	nsp7 [polyprotein=ORF1ab polyprotein] [organism=Severe acute respiratory syndrome coronavirus 2] [isolate=SARS-CoV-2/human/USA/MD-MDH-0028/2020]	SKMSDVKCTSVVLLSVLQQLRVESSSKLWAQCVQLHNDILLAKDTTEAFEKMVALLSVLLSMQGAVDINKLCEEMLDNRATLQ
WEX54355.1:3830-3912 (38)	nsp7 [polyprotein=ORF1ab polyprotein] [organism=Severe acute respiratory syndrome coronavirus 2] [isolate=SARS-CoV-2/human/USA/WA-PHL-016366/2022]	SKMSDVKCTSVVLLXXXXXXXXXXXXXXXXXXXXXXXXXXXAKDTTEAFEKMVSLLSVLLSMQGAVDINKLCEEMLDNRATLQ
QUF29962.1:3860-3942 (38)	nsp7 [polyprotein=ORF1ab polyprotein] [organism=Severe acute respiratory syndrome coronavirus 2] [isolate=SARS-CoV-2/human/USA/OR-CDC-ASC210025423/2021]	SKMSDVKCTSVVLLSVLQQLRVESASKLWAQCVQLHNDILLAKDTTEAFEKMVSLLSVLLSMQGAVDINKLCEEMLDNRATLQ
WEJ28512.1:3834-3916 (38)	nsp7 [polyprotein=ORF1ab polyprotein] [organism=Severe acute respiratory syndrome coronavirus 2] [isolate=SARS-CoV-2/human/USA/TG1003032/2022]	XXXXXXXXXXXXXXXXXXXXXXXXXXXXXXXCVQLHNDILLAKDTTEAFEKMVSLLSVLLSMQGAVDINKLCEEMLDNRATLQ
WAK89154.1:3857-3939 (38)	nsp7 [polyprotein=ORF1ab polyprotein] [organism=Severe acute respiratory syndrome coronavirus 2] [isolate=SARS-CoV-2/human/USA/UT-UPHL-221130129780/2022]	SKMSDVKCTSVVLLSVLQQLRVESSSKLWAQCVQLHNDILLAKDTTEAFEKMVSLLSVLLSRQGAVDINKLCEEMLDNRATLQ
UXG22926.1:3857-3939 (38)	nsp7 [polyprotein=ORF1ab polyprotein] [organism=Severe acute respiratory syndrome coronavirus 2] [isolate=SARS-CoV-2/human/USA/FL-CDC-STM-99PZ5J29E/2022]	SKMSDVKCTSVVLLSVLQQLRVESSSKLWAQCVQLHNDILLAKDTTEAFEKMVSLLSVLLSXQGAVDINKLCEEMLDNRATLQ
UML01963.1:3860-3942 (38)	nsp7 [polyprotein=ORF1ab polyprotein] [organism=Severe acute respiratory syndrome coronavirus 2] [isolate=SARS-CoV-2/human/USA/NM-UNM-TRL_3D2021_734/2021]	SKMSDLKCTSVVLLSVLQQLRVESSSKLWAQCVQLHNDILLAKDTTEAFEKMVSLLSVLLSMQGAVDINKLCEEMLDNRATLQ
URB22240.1:3860-3942 (38)	nsp7 [polyprotein=ORF1ab polyprotein] [organism=Severe acute respiratory syndrome coronavirus 2] [isolate=SARS-CoV-2/human/BRA/SP-NVBS8047GENOV828214763722/2021]	SKMSDVKCTSVVLLSVLQQLRVESSSKLWAQCVQLHNDILLAKDTTEAFEKMVSLLSVLLSMQGAVDINKLCKEMLDNRATLQ
WCC82328.1:3800-3882 (36)	nsp7 [polyprotein=ORF1ab polyprotein] [organism=Severe acute respiratory syndrome coronavirus 2] [isolate=SARS-CoV-2/human/USA/VA-VTVAS3-GSC41287/2022]	SKMSDVKCTSVVLLSVXXXXXXXXXXXXXXXXXXXXXXXXXXXXXXXXXXXXXXXXXXXXXXXXXXXXXXXXXXXXXXXXXXX
ULC90171.1:3860-3942 (36)	nsp7 [polyprotein=ORF1ab polyprotein] [organism=Severe acute respiratory syndrome coronavirus 2] [isolate=SARS-CoV-2/human/USA/CA-CDPH-3000265618/2021]	SKMSDVKCTSVVLLSVLQQLRVESSSKLWAQCVQLHNDILLAKDTTEAFEKMVSLLSVLLSMQGAVDINKLCEEMLDNRAALQ
UJB10681.1:3859-3941 (36)	nsp7 [polyprotein=ORF1ab polyprotein] [organism=Severe acute respiratory syndrome coronavirus 2] [isolate=SARS-CoV-2/human/USA/OKPHLCOV0009417/2022]	SKMSDVKCTSVVLLSVLQQLRVESSSKLWAQCVQLHNXXXXAKDTTEAFEKMVSLLSVLLSMQGAVDINKLCEEMLDNRATLQ
UPW87413.1:3860-3942 (36)	nsp7 [polyprotein=ORF1ab polyprotein] [organism=Severe acute respiratory syndrome coronavirus 2] [isolate=SARS-CoV-2/human/USA/TG274721/2020]	SKMXDVKCTSVVLLSVLQQLRVESSSKLWAQCVQLHNDILLAKDTTEAFEKMVSLLSVLLSMQGAVDINKLCEEMLDNRATLQ
QOC66579.1:3837-3919 (36)	nsp7 [polyprotein=ORF1ab polyprotein] [organism=Severe acute respiratory syndrome coronavirus 2] [isolate=SARS-CoV-2/human/USA/CA-CZB-2358/2020]	SKMSDVKCTSVVLLSVLQQLRVESSSKLWAQXVQLHNDILLAKDTTEAFEKMVSLLSVLLSMQGAVDINKLCEEMLDNRATLQ
QWT66040.1:3857-3939 (36)	nsp7 [polyprotein=ORF1ab polyprotein] [organism=Severe acute respiratory syndrome coronavirus 2] [isolate=SARS-CoV-2/human/USA/MN-CDC-IBX921669789003/2021]	SKMSDVKCTSVVLLSVLQQLRVESSSKLWAQCVQLHNDILLAKDTTEAFEKMVSLLSVLLSMQGAVDINKLSEEMLDNRATLQ
UQF84839.1:3856-3938 (36)	nsp7 [polyprotein=ORF1ab polyprotein] [organism=Severe acute respiratory syndrome coronavirus 2] [isolate=SARS-CoV-2/human/USA/MI-MDHHS-SC40629/2022]	XXXXXXXXXXXXXXXXLQQLRVESSSKLWAQCIQLHNDILLAKDTTEAFEKMVSLLSVLLSMQGAVDINKLCEEMLDNRATLQ
UYR73658.1:3857-3939 (36)	nsp7 [polyprotein=ORF1ab polyprotein] [organism=Severe acute respiratory syndrome coronavirus 2] [isolate=SARS-CoV-2/human/USA/FL-CDC-STM-7D34WKGHN/2022]	SKMSDVKCTSVVLLSVLQQLRVESSSKLWAQCVQLHNDILLAKDTTEAFEKMVSLLSVLLSMQGXVDINKLCEEMLDNRATLQ
QPF54636.1:3860-3942 (36)	nsp7 [polyprotein=ORF1ab polyprotein] [organism=Severe acute respiratory syndrome coronavirus 2] [isolate=SARS-CoV-2/human/USA/CA-CZB-11549/2020]	SKMSDVKCTSVVLLSVLQQLRVESSSKLWALCVQLHNDILLAKDTTEAFEKMVSLLSVLLSMQGAVDINKLCEEMLDNRATLQ
UBX08239.1:3859-3941 (36)	nsp7 [polyprotein=ORF1ab polyprotein] [organism=Severe acute respiratory syndrome coronavirus 2] [isolate=SARS-CoV-2/human/USA/NY-CDC-FG-136197/2021]	SKMSDVKCTSVVLLSVLQQLRVESSSKLWAQCVQLHNXXXXXXXXXXXXXXXXXXXXXXXXXXXXXXXXKLCEEMLDNRATLQ
QZZ46084.1:3860-3942 (36)	nsp7 [polyprotein=ORF1ab polyprotein] [organism=Severe acute respiratory syndrome coronavirus 2] [isolate=SARS-CoV-2/human/USA/TX-HHD-2108195955/2021]	SKMSDVKCTSVVLLSVLQQLRVESSSILWAQCVQLHNDILLAKDTTEAFEKMVSLLSVLLSMQGAVDINKLCEEMLDNRATLQ
QPN06082.1:3860-3942 (36)	nsp7 [polyprotein=ORF1ab polyprotein] [organism=Severe acute respiratory syndrome coronavirus 2] [isolate=SARS-CoV-2/human/USA/WI-UW-2212/2020]	SKMSXVKCTSVVLLSVLQQLRVESSSKLWAQCVQLHNDILLAKDTTEAFEKMVSLLSVLLSMQGAVDINKLCEEMLDNRATLQ
WBW05629.1:3569-3651 (34)	nsp7 [polyprotein=ORF1a polyprotein] [organism=Severe acute respiratory syndrome coronavirus 2] [isolate=SARS-CoV-2/human/USA/AZ-2023-0035/2023]	XXXXXVKCTSVVLLSVLQQLRVESSSKLWAQCVQLHNDILLAKDTTEAFEKMVSLLSVLLSMQGAVDINKLCEEMLDNRATLQ
UML50632.1:3835-3917 (34)	nsp7 [polyprotein=ORF1ab polyprotein] [organism=Severe acute respiratory syndrome coronavirus 2] [isolate=SARS-CoV-2/human/USA/CA-CDC-ASC210750190/2022]	SKMSDVKCTSVVLLSVLQQLRVESSSKLWAQCVQLHNDILLAKDTTEAFEKMVSLLSVLXXXXXXXXXXXXXXXXXXXXXXXX
UTQ22432.1:3860-3942 (34)	nsp7 [polyprotein=ORF1ab polyprotein] [organism=Severe acute respiratory syndrome coronavirus 2] [isolate=SARS-CoV-2/Odocoileus virginianus/USA/149738/2021]	XXXXXXXXXXXXXXXXXXXXXXXXXXXXXXXXXXXXXXXXXAKDTTEAFXKMVSLLSVLLSMQGAVDINKLCEEMLDNRATLQ
UDO89624.1:3834-3916 (34)	nsp7 [polyprotein=ORF1ab polyprotein] [organism=Severe acute respiratory syndrome coronavirus 2] [isolate=SARS-CoV-2/human/USA/CO-CDPHE-2007172112/2020]	SKMXXXXXXXXXXXXXLQQLRVESSSKLWAQCVQLHNDILLAKDTTEAFEKMVSLLSVLLSMQGAVDINKLCEEMLDNRATLQ
UFK33696.1:3860-3942 (34)	nsp7 [polyprotein=ORF1ab polyprotein] [organism=Severe acute respiratory syndrome coronavirus 2] [isolate=SARS-CoV-2/human/USA/CO-CDC-MMB11255147/2021]	SKMSDVKCTSVVLLSVLQQLRVXXXXXXXXXXXXXXXDILLAKDTTEAFEKMVSLLSVLLSMQGAVDINKLCEEMLDSRATLQ
UZW46903.1:3860-3942 (34)	nsp7 [polyprotein=ORF1a polyprotein] [organism=Severe acute respiratory syndrome coronavirus 2] [isolate=SARS-CoV-2/human/BRA/EPI_ISL_4273459/2021]	XXXXXXXXXXXXXXSVLQQLRVESSSKLWAQCVQLHNDILLAKDTTEAFEKMVSLLSVLLSMQGAVDINKLCEEMLDNRATLQ
QUC89448.1:3857-3939 (34)	nsp7 [polyprotein=ORF1ab polyprotein] [organism=Severe acute respiratory syndrome coronavirus 2] [isolate=SARS-CoV-2/human/USA/VA-CDC-LC0037159/2021]	SKMSDVKCTSVVLLSVLQQLRVESSSKLWAQCVQLHNDILLAKDTTEAFEKMVSLLSVLLSMQGAVDIKKLCEEMLDNRATLQ
UZG65512.1:3856-3938 (33)	nsp7 [polyprotein=ORF1ab polyprotein] [organism=Severe acute respiratory syndrome coronavirus 2] [isolate=SARS-CoV-2/human/USA/FL-BPHL-21147/2021]	SKMSDVKCTSVVLLSVLQQLXXXXXXXXXXXXXXXXXXXXXXXXXXXXXXXXXXXXXXXXXXXXXXXXXXXXXXXXXXXXXXX
UJE50998.1:3860-3942 (32)	nsp7 [polyprotein=ORF1ab polyprotein] [organism=Severe acute respiratory syndrome coronavirus 2] [isolate=SARS-CoV-2/human/USA/IL-CDC-ASC210570067/2021]	SKMSDXXCTSVVLLSVLQQLRVESSSKLWAQCVQLHNDILLAKDTTEAFEKMVSLLSVLLSMQGAVDINKLCEEMLDNRATLQ
UGY75561.1:3860-3942 (32)	nsp7 [polyprotein=ORF1ab polyprotein] [organism=Severe acute respiratory syndrome coronavirus 2] [isolate=SARS-CoV-2/human/USA/21074563/2021]	SKMSDVXXXSVVLLSVLQQLRVESSSKLWAQCVQLHNDILLAKDTTEAFEKMVSLLSVLLSMQGAVDINKLCEEMLDNRATLQ
UXL81961.1:3857-3939 (32)	nsp7 [polyprotein=ORF1ab polyprotein] [organism=Severe acute respiratory syndrome coronavirus 2] [isolate=SARS-CoV-2/human/BEN/507716/2021]	SKMSDVKCTSVVLLSVLQQLRVESSSKLWAQCVQLHNDILLAKDTTEAFEKMVSLLSVLLSMQGAXXXXXXXXXXXXXXXXXX
UQD16440.1:3829-3911 (32)	nsp7 [polyprotein=ORF1a polyprotein] [organism=Severe acute respiratory syndrome coronavirus 2] [isolate=SARS-CoV-2/human/FRA/IHUCOVID-066860_Nova1/2022]	SKMSDVKCTSVVLLSVLQQLRVESXXXXXXXXXXXXXXXXXAKDTTEAFEKMVSLLSVLLSMQGAVDINKLCEEMLDNRATLQ
QKV39226.1:3860-3942 (32)	nsp7 [polyprotein=ORF1ab polyprotein] [organism=Severe acute respiratory syndrome coronavirus 2] [isolate=SARS-CoV-2/human/USA/WA-S846/2020]	SKMSDVKCTXVVLLSVLQQLRVESSSKLWAQCVQLHNDILLAKDTTEAFEKMVSLLSVLLSMQGAVDINKLCEEMLDNRATLQ
UUZ09017.1:3857-3939 (30)	nsp7 [polyprotein=ORF1a polyprotein] [organism=Severe acute respiratory syndrome coronavirus 2] [isolate=SARS-CoV-2/human/USA/TX-DSHS-21878/2022]	SKMSDVKCTSVVLLSVLQQLRVESSSKLWAQCVQXHNDILLAKDTTEAFEKMVSLLSVLLSMQGAVDINKLCEEMLDNRATLQ
UMZ68755.1:3856-3938 (30)	nsp7 [polyprotein=ORF1ab polyprotein] [organism=Severe acute respiratory syndrome coronavirus 2] [isolate=SARS-CoV-2/human/USA/CO-CDC-MMB14320501/2022]	SKMSDVKCTSVVLLSVLQQLRVESSSKLWAQCVLLHNDILLAKDTTEAFEKMVSLLSVLLSMQGAVDINKLCEEMLDNRATLQ
UDK71089.1:3860-3942 (30)	nsp7 [polyprotein=ORF1ab polyprotein] [organism=Severe acute respiratory syndrome coronavirus 2] [isolate=SARS-CoV-2/human/USA/IL-CDC-ASC210284306/2021]	SKMSDVKCTSVVLLSVLQQLRVESSSKLWAQCVQLHNDILLATDTTEAFEKMVSLLSVLLSMQGAVDINKLCEEMLDNRATLQ
WBK27554.1:3857-3939 (30)	nsp7 [polyprotein=ORF1ab polyprotein] [organism=Severe acute respiratory syndrome coronavirus 2] [isolate=SARS-CoV-2/human/USA/LA-PHL-LAPH000413B/2022]	SKMSDVKCTSVVLLSVLQQLRVESSSXXXXXXXQLHNDILLAKDTTEAFEKMVSLLSVLLSMQGAVDINKLCEEMLDNRATLQ
USF09272.1:3857-3939 (30)	nsp7 [polyprotein=ORF1ab polyprotein] [organism=Severe acute respiratory syndrome coronavirus 2] [isolate=SARS-CoV-2/human/USA/OH-CDC-QDX37596936/2022]	SKMSDVKCTSVVLLTVLQQLRVESSSKLWAQCVQLHNDILLAKDTTEAFEKMVSLLSVLLSMQGAVDINKLCEEMLDNRATLQ
QTD18897.1:3605-3687 (30)	nsp7 [polyprotein=ORF1ab polyprotein] [organism=Severe acute respiratory syndrome coronavirus 2] [isolate=SARS-CoV-2/human/USA/FL-CDC-STM-000014581/2021]	SKMSDVKCTSVVLLSVLQQLRVESSSKLWAQCVQLHNDILLAKDTTEAFEKMVSLLSVLLSMQGXXXXXXXXXXXXXXXXXXX
QZN83073.1:3860-3942 (30)	nsp7 [polyprotein=ORF1ab polyprotein] [organism=Severe acute respiratory syndrome coronavirus 2] [isolate=SARS-CoV-2/human/USA/OSPHL02179/2021]	SKMSDVKCTSVVLLSVLQQLGVXXXXXXXXXXXXXXXDILLAKDTTEAFEKMVSLLSVLLSMQGAVDINKLCEEMLDNRATLQ
UGS97666.1:3860-3942 (30)	nsp7 [polyprotein=ORF1ab polyprotein] [organism=Severe acute respiratory syndrome coronavirus 2] [isolate=SARS-CoV-2/human/USA/OH-CDC-MMB11577032/2021]	SKMSDVKCTSVVLLSVLQQLRVESSSKLWAQCVQLHNDILLAKDTTEAFEQMVSLLSVLLSMQGAVDINKLCEEMLDNRATLQ
UIA39124.1:3860-3942 (30)	nsp7 [polyprotein=ORF1ab polyprotein] [organism=Severe acute respiratory syndrome coronavirus 2] [isolate=SARS-CoV-2/human/USA/MI-MDHHS-SC38040/2021]	SKMSXXXXTSVVLLSVLQQLRVESSSKLWAQCVQLHNDILLAKDTTEAFEKMVSLLSVLLSMQGAVDINKLCEEMLDNRATLQ
UEW35364.1:3860-3942 (30)	nsp7 [polyprotein=ORF1a polyprotein] [organism=Severe acute respiratory syndrome coronavirus 2] [isolate=SARS-CoV-2/human/USA/FL-CDC-ASC210497586/2021]	SKMSDVKCTSVVLLSVLQQLXVESSSKLWAQCVQLHNDILLAKDTTEAFEKMVSLLSVLLSMQGAVDINKLCEEMLDNRATLQ
UMJ60598.1:3854-3936 (29)	nsp7 [polyprotein=ORF1ab polyprotein] [organism=Severe acute respiratory syndrome coronavirus 2] [isolate=SARS-CoV-2/human/USA/CA-CDC-ASC210748926/2022]	SKMSDVKCTSVVLLSVLQQLRVESSSKLWAQCVQLHNDILLAKDTTEAFEKMVSLLSVLLSMXXXXXXXXXXXXXXXXXXXXX
UPB60314.1:3731-3813 (29)	nsp7 [polyprotein=ORF1ab polyprotein] [organism=Severe acute respiratory syndrome coronavirus 2] [isolate=SARS-CoV-2/human/FRA/IHUCOVID-051451-Nova1M/2020]	SKMSDVKCTSVVLLSVLQQLRVESSSKLWAXXXXXXXXXXXXXXXXXXXXXXXXXXXXXXXXXXXXXXXXXXXXXXXXXXXXX
UDE38537.1:3860-3942 (29)	nsp7 [polyprotein=ORF1ab polyprotein] [organism=Severe acute respiratory syndrome coronavirus 2] [isolate=SARS-CoV-2/human/USA/CA-CDC-FG-148469/2021]	SKMSDVKCTSVVLLSVLQQLRVESSSKLWAQCVQLHNDILLAKDTTEAFEKMVSLLSVLLSMQGAVDINKLCEEMLDNRATLH
UMQ88145.1:3860-3942 (28)	nsp7 [polyprotein=ORF1ab polyprotein] [organism=Severe acute respiratory syndrome coronavirus 2] [isolate=SARS-CoV-2/human/USA/TN-VUMC-002720/2021]	SKMSDVKCTSVVLLSVLQQLRVESSSKLWAQCVQLHNDILLAKDTTEAFEKMVSLLSVLLSMQGAVDINKLCEEMXXXXXXXX
QVV50597.1:3857-3939 (28)	nsp7 [polyprotein=ORF1ab polyprotein] [organism=Severe acute respiratory syndrome coronavirus 2] [isolate=SARS-CoV-2/human/USA/FL-CDC-STM-000070002/2021]	SKMSDVKCTSVVLLSVLQQLRVESSSKLWAQCVQLHNDILLAKDTTEAFEKMVSLLSVLLSMQGAADINKLCEEMLDNRATLQ
UGV64853.1:3860-3942 (28)	nsp7 [polyprotein=ORF1a polyprotein] [organism=Severe acute respiratory syndrome coronavirus 2] [isolate=SARS-CoV-2/human/USA/CA-CDPH-3000274092/2021]	SKMSDVXXTSVVLLSVLQQLRVESSSKLWAQCVQLHNDILLAKDTTEAFEKMVSLLSVLLSMQGAVDINKLCEEMLDNRATLQ
UQR42387.1:3860-3942 (28)	nsp7 [polyprotein=ORF1ab polyprotein] [organism=Severe acute respiratory syndrome coronavirus 2] [isolate=SARS-CoV-2/human/USA/TG1000277/2021]	SXXXXXXCTSVVLLSVLQQLRVESSSKLWAQCVQLHNDILLAKDTTEAFEKMVSLLSVLLSMQGAVDINKLCEEMLDNRATLQ
UHR45631.1:3860-3942 (28)	nsp7 [polyprotein=ORF1a polyprotein] [organism=Severe acute respiratory syndrome coronavirus 2] [isolate=SARS-CoV-2/human/USA/PA-CDC-ASC210612803/2021]	SKMSDVKCTSVVLLSVLQQLRVESSSKLXXQCVQLHNDILLAKDTTEAFEKMVSLLSVLLSMQGAVDINKLCEEMLDNRATLQ
QZS75464.1:3860-3942 (28)	nsp7 [polyprotein=ORF1ab polyprotein] [organism=Severe acute respiratory syndrome coronavirus 2] [isolate=SARS-CoV-2/human/USA/LA-CDC-ASC210211087/2021]	SKMSDVKCTSVVLLSVLQQLRVESSSKLWAQCVQLHNDILLAKXXTEAFEKMVSLLSVLLSMQGAVDINKLCEEMLDNRATLQ
UDF72048.1:3859-3941 (28)	nsp7 [polyprotein=ORF1ab polyprotein] [organism=Severe acute respiratory syndrome coronavirus 2] [isolate=SARS-CoV-2/Human/USA/CA-OC-FG-136617/2021]	SKMSDAKCTSVVLLSVLQQLRVESSSKLWAQCVQLHNDILLAKDTTEAFEKMVSLLSVLLSMQGAVDINKLCEEMLDNRATLQ
UWX99963.1:3857-3939 (28)	nsp7 [polyprotein=ORF1ab polyprotein] [organism=Severe acute respiratory syndrome coronavirus 2] [isolate=SARS-CoV-2/human/USA/WA-UW-22081408059/2022]	SKMSDVKCTSVVLLSVLQQLRVESSSKLWAKCVQLHNDILLAKDTTEAFEKMVSLLSVLLSMQGAVDINKLCEEMLDNRATLQ
QSU72725.1:3836-3918 (28)	nsp7 [polyprotein=ORF1ab polyprotein] [organism=Severe acute respiratory syndrome coronavirus 2] [isolate=SARS-CoV-2/human/USA/FL-BPHL-0908/2021]	SKMSDXXXXSVVLLSVLQQLRVESSSKLWAQCVQLHNDILLAKDTTEAFEKMVSLLSVLLSMQGAVDINKLCEEMLDNRATLQ
ULH32626.1:3860-3942 (28)	nsp7 [polyprotein=ORF1ab polyprotein] [organism=Severe acute respiratory syndrome coronavirus 2] [isolate=SARS-CoV-2/human/USA/CUMC-20182002/2020]	SKMSDVKCTSVVLLSVLQQLRVESSSKLXXXXXXXXXXXXXXXXXXXXXXXXXSLLSVLLSMQGAVDINKLCEEMLDNRATLQ
UQR39100.1:3857-3939 (28)	nsp7 [polyprotein=ORF1ab polyprotein] [organism=Severe acute respiratory syndrome coronavirus 2] [isolate=SARS-CoV-2/human/USA/TG1175752/2022]	SKMSDVKCTSVVLLSVLQQLRVESSSKLWAQCVQLHNDILLAKDTTEAFEKMVSLLSVXXXXXXXXXXXXXXXXXXXXXXXXX
ULU59976.1:3856-3938 (28)	nsp7 [polyprotein=ORF1ab polyprotein] [organism=Severe acute respiratory syndrome coronavirus 2] [isolate=SARS-CoV-2/human/USA/B013672/2022]	SKMSDVKCTSVVLLSVXQQLRVESSSKLWAQCVQLHNDILLAKDTTEAFEKMVSLLSVLLSMQGAVDINKLCEEMLDNRATLQ
UYM08612.1:3830-3912 (28)	nsp7 [polyprotein=ORF1a polyprotein] [organism=Severe acute respiratory syndrome coronavirus 2] [isolate=SARS-CoV-2/human/USA/JW8221/2022]	XXXXXXXXXXXXXXXXXXXXXXXXXXXXXXXXXXXXXXXXXXKDTTEAFEKMVSLLSVLLSMQGAVDINKLCEEMLDNRATLQ
QYP90738.1:3860-3942 (28)	nsp7 [polyprotein=ORF1a polyprotein] [organism=Severe acute respiratory syndrome coronavirus 2] [isolate=SARS-CoV-2/human/USA/UT-UPHL-210729477070/2021]	SKMSDVKCTSVVXLSVLQQLRVESSSKLWAQCVQLHNDILLAKDTTEAFEKMVSLLSVLLSMQGAVDINKLCEEMLDNRATLQ
UHW22779.1:3860-3942 (28)	nsp7 [polyprotein=ORF1ab polyprotein] [organism=Severe acute respiratory syndrome coronavirus 2] [isolate=SARS-CoV-2/human/USA/MA-CDCBI-CRSP_L3LPCORUNN7CNVUY/2021]	XXXSDVKCTSVVLLSVLQQLRVESSSKVWAQCVQLHNDILLAKDTTEAFEKMVSLLSVLLSMQGAVDINKLCEEMLDNRATLQ
QUL63735.1:3857-3939 (28)	nsp7 [polyprotein=ORF1ab polyprotein] [organism=Severe acute respiratory syndrome coronavirus 2] [isolate=SARS-CoV-2/human/USA/MA-CDCBI-CRSP_BSDOYICRDHDBF6HL/2021]	XXXXXXKCTSVVLLSVLQQLRVESSSKLWAQCVQLHNDILLAKDTTEAFEKMVSLFSVLLSMQGAVDINKLCEEMLDNRATLQ
UJZ09765.1:3856-3938 (26)	nsp7 [polyprotein=ORF1ab polyprotein] [organism=Severe acute respiratory syndrome coronavirus 2] [isolate=SARS-CoV-2/human/USA/VI-CDC-2-5419033/2021]	SKMSDVKCTSVVLLSVLQQLRVESSSXLWAQCVQLHNDILLAKDTTEAFEKMVSLLSVLLSMQGAVDINKLCEEMLDNRATLQ
UNA74544.1:3856-3938 (26)	nsp7 [polyprotein=ORF1ab polyprotein] [organism=Severe acute respiratory syndrome coronavirus 2] [isolate=SARS-CoV-2/human/USA/KY-CDC-ASC210753694/2022]	SKMSDVKCTSVVLLSVLQQLRVESSSKLWAQCVQLHNDILLAKDTTEAFEKMVSLLSVLLSMQGAVXXXXXXXXXXXXXXXXX
WBG99114.1:3857-3939 (26)	nsp7 [polyprotein=ORF1ab polyprotein] [organism=Severe acute respiratory syndrome coronavirus 2] [isolate=SARS-CoV-2/human/USA/GA-CDC-STM-PD9P4JMG9/2022]	SKMSDVKCTSVVLLSVLQQLRVESSSKLWAQCVQLHNDILLAKDTTEAFEKXVSLLSVLLSMQGAVDINKLCEEMLDNRATLQ
WDD59890.1:3843-3925 (26)	nsp7 [polyprotein=ORF1ab polyprotein] [organism=Severe acute respiratory syndrome coronavirus 2] [isolate=SARS-CoV-2/human/USA/VA-VTVAS3-GSC41647/2023]	SKMSDVKCTSVVLLSVLQXXXXXXXXXXXXXXXXXXXXXXXXXXXXXXXXXXXXXXXXXXXXXXXXXXXXXXXXXXXXXXXXX
UFJ30852.1:3860-3942 (26)	nsp7 [polyprotein=ORF1ab polyprotein] [organism=Severe acute respiratory syndrome coronavirus 2] [isolate=SARS-CoV-2/human/USA/CO-CDC-MMB11260421/2021]	SKMSDVKCTSVVLLSVLQQLRVESSSKXXXXXVQLHNDILLAKDTTEAFEKMVSLLSVLLSMQGAVDINKLCEEMLDNRATLQ
UEH78533.1:3860-3942 (26)	nsp7 [polyprotein=ORF1ab polyprotein] [organism=Severe acute respiratory syndrome coronavirus 2] [isolate=SARS-CoV-2/human/USA/OR-CDC-ASC210359655/2021]	SKMSDVKCTSVVLLSVLQQLRVESSSKLWAQCVQLHNDILLAKDTTEAFEKMVSLLSVLLSMQGAVDINKLCEEMLDNXATLQ
URF40831.1:3856-3938 (26)	nsp7 [polyprotein=ORF1ab polyprotein] [organism=Severe acute respiratory syndrome coronavirus 2] [isolate=SARS-CoV-2/human/USA/VA-VTVAS3-GSC34219/2022]	SKMSDVKCTSVVLLSVLQQLRVESSSKLWAQCXXXXXXXXXAKDTTEAFEKMVSLLSVLLSMQGAVDINKLCEEMLDNRATLQ
ULE37113.1:3860-3942 (26)	nsp7 [polyprotein=ORF1ab polyprotein] [organism=Severe acute respiratory syndrome coronavirus 2] [isolate=SARS-CoV-2/Mink_American/USA/UT-CDC-4455687-001/2020]	SKMSDVKCTSVVLLSVLQQLRVESSSKLWAQCVQLHNDILLAXDTTEAFEKMVSLLSVLLSMQGAVDINKLCEEMLDNRATLQ
WAU51435.1:3856-3938 (26)	nsp7 [polyprotein=ORF1ab polyprotein] [organism=Severe acute respiratory syndrome coronavirus 2] [isolate=SARS-CoV-2/human/USA/B017190/2021]	SKMSDVKCTSVVLLSVLQQLRVESSSKLWAQCVQLHNDILLAKDTTEAFEKVVSLLSVLLSMQGAVDINKLCEEMLDNRATLQ
UJW51509.1:3856-3938 (26)	nsp7 [polyprotein=ORF1ab polyprotein] [organism=Severe acute respiratory syndrome coronavirus 2] [isolate=SARS-CoV-2/human/USA/CA-CDC-FG-247018/2022]	SKMSDVKCTSVVLLSALQQLRVESSSKLWAQCVQLHNDILLAKDTTEAFEKMVSLLSVLLSMQGAVDINKLCEEMLDNRATLQ
ULC35994.1:3856-3938 (26)	nsp7 [polyprotein=ORF1ab polyprotein] [organism=Severe acute respiratory syndrome coronavirus 2] [isolate=SARS-CoV-2/human/USA/NY-CDC-LC0517660/2022]	SKMSDVKCTSVVLLSVLQQLRVESSSKLWAQCVQLHNDILLAKDTTEAFEKMVSLLSVLLSMQGAVDITKLCEEMLDNRATLQ
QSO02078.1:3860-3942 (26)	nsp7 [polyprotein=ORF1ab polyprotein] [organism=Severe acute respiratory syndrome coronavirus 2] [isolate=SARS-CoV-2/human/USA/GA-CDC-LC0017370/2021]	SKMSDVKCTSVVLLSVLQQLRVESSSKLWAQCVQLHNDILLAKDTTEAFEKMVSLLSVLLCMQGAVDINKLCEEMLDNRATLQ
QSV87086.1:3860-3942 (26)	nsp7 [polyprotein=ORF1ab polyprotein] [organism=Severe acute respiratory syndrome coronavirus 2] [isolate=SARS-CoV-2/human/USA/OH-CDC-LC0019354/2021]	SKMSDVKCTSVVLLSVLQQLRVESSSKLWAQCVQLHNDILLAKDTTEAFEKMVSLLSVLLSMQGAVDINKLCEEMLDNRANLQ
UXX28317.1:3830-3912 (24)	nsp7 [polyprotein=ORF1ab polyprotein] [organism=Severe acute respiratory syndrome coronavirus 2] [isolate=SARS-CoV-2/human/USA/WA-PHL-024651/2022]	SKMSDVKCTSVVLXXXXXXXXXXXXXXXXXXXXXXXXXXXXAKDTTEAFEKMVSLLSVLLSMQGAVDINKLCEEMLDNRATLQ
UPE92340.1:3860-3942 (24)	nsp7 [polyprotein=ORF1a polyprotein] [organism=Severe acute respiratory syndrome coronavirus 2] [isolate=SARS-CoV-2/human/FRA/IHUCOVID-000866/2020]	SKMSDVKCTSVVLLSVLQQLRVESSSKLWAQCVQLHXXXXXXXXXXXXXXXXXXXXXXXXXXXXXXXXXXXXXXXXXXXXXXX
UCO45053.1:3860-3942 (24)	nsp7 [polyprotein=ORF1ab polyprotein] [organism=Severe acute respiratory syndrome coronavirus 2] [isolate=SARS-CoV-2/human/USA/CA-CDC-ASC210082474/2021]	SKMSDVKCTSVVLLSVLQQLRVESSSKLWAQCVQLHNDILLAKDTNEAFEKMVSLLSVLLSMQGAVDINKLCEEMLDNRATLQ
UWV56496.1:3857-3939 (24)	nsp7 [polyprotein=ORF1ab polyprotein] [organism=Severe acute respiratory syndrome coronavirus 2] [isolate=SARS-CoV-2/human/USA/CT-CDC-LC0872569/2022]	SKMSDVKCTSVVLXSVLQQLRVESSSKLWAQCVQLHNDILLAKDTTEAFEKMVSLLSVLLSMQGAVDINKLCEEMLDNRATLQ
UDA98003.1:3857-3939 (24)	nsp7 [polyprotein=ORF1ab polyprotein] [organism=Severe acute respiratory syndrome coronavirus 2] [isolate=SARS-CoV-2/human/USA/SEARCH-102293/2021]	SKMSDVKCTSVVLLSVLQQLRVESSSKLWAQCVQLHNDILLAKDTTETFEKMVSLLSVLLSMQGAVDINKLCEEMLDNRATLQ
UNJ08266.1:3860-3942 (24)	nsp7 [polyprotein=ORF1ab polyprotein] [organism=Severe acute respiratory syndrome coronavirus 2] [isolate=SARS-CoV-2/human/USA/CA-CDPH-2000053373/2021]	SKMSDVKCTSVVLLSVLQQLRVESSSKLWAQCVQLHNDILLAKDTTEAFEKMVSLLSVLLSMQGAVDINKLCEEMLDNXXXXX
UWL56146.1:3797-3879 (24)	nsp7 [polyprotein=ORF1ab polyprotein] [organism=Severe acute respiratory syndrome coronavirus 2] [isolate=SARS-CoV-2/human/USA/MA-CDCBI-CRSP_QDPYHLDTYTSDM4TX/2022]	SKMSDVKCTSVVLLSVLQXLRVESSSKLWAQCVQLHNDILLAKDTTEAFEKMVSLLSVLLSMQGAVDINKLCEEMLDNRATLQ
QNO88965.1:3860-3942 (24)	nsp7 [polyprotein=ORF1ab polyprotein] [organism=Severe acute respiratory syndrome coronavirus 2] [isolate=SARS-CoV-2/human/AUS/VIC6260/2020]	SKMSDVKCTSVFLLSVLQQLRVESSSKLWAQCVQLHNDILLAKDTTEAFEKMVSLLSVLLSMQGAVDINKLCEEMLDNRATLQ
UHR40275.1:3860-3942 (24)	nsp7 [polyprotein=ORF1a polyprotein] [organism=Severe acute respiratory syndrome coronavirus 2] [isolate=SARS-CoV-2/human/USA/IL-CDC-ASC210536749/2021]	SKMSDVKCTSXXXLSVLQQLRVESSSKLWAQCVQLHNDILLAKDTTEAFEKMVSLLSVLLSMQGAVDINKLCEEMLDNRATLQ
UQG77778.1:3838-3920 (24)	nsp7 [polyprotein=ORF1ab polyprotein] [organism=Severe acute respiratory syndrome coronavirus 2] [isolate=SARS-CoV-2/human/USA/TG1061635/2021]	SKMSDVKCTSVVLLSVLQQLRVESSSKLWAQCVQLHNDILLAKDTTXXXXXXXXXXXXXXXXXXXXXXXXXXXXXXXXXXXXX
UPM38284.1:3860-3942 (24)	nsp7 [polyprotein=ORF1ab polyprotein] [organism=Severe acute respiratory syndrome coronavirus 2] [isolate=SARS-CoV-2/human/USA/CA-CDPH-2000010061/2020]	SKLSDVKCTSVVLLSVLQQLRVESSSKLWAQCVQLHNDILLAKDTTEAFEKMVSLLSVLLSMQGAVDINKLCEEMLDNRATLQ
UNJ76828.1:3860-3942 (24)	nsp7 [polyprotein=ORF1ab polyprotein] [organism=Severe acute respiratory syndrome coronavirus 2] [isolate=SARS-CoV-2/human/USA/MI-MDHHS-SC40015/2022]	SKMSDVKCTSVVLLSVLQQLRVESSSKLWAQCVQLHNDILLAKDTTEAFEKMVSLLSVXLSMQGAVDINKLCEEMLDNRATLQ
UHI21345.1:3860-3942 (24)	nsp7 [polyprotein=ORF1ab polyprotein] [organism=Severe acute respiratory syndrome coronavirus 2] [isolate=SARS-CoV-2/human/USA/AL-CDC-ASC210523301/2021]	SKMSDVKCTSVXXLSVLQQLRVESSSKLWAQCVQLHNDILLAKDTTEAFEKMVSLLSVLLSMQGAVDINKLCEEMLDNRATLQ
QYC59213.1:3857-3939 (24)	nsp7 [polyprotein=ORF1ab polyprotein] [organism=Severe acute respiratory syndrome coronavirus 2] [isolate=SARS-CoV-2/human/USA/PA-CDC-2-4635200/2021]	SKMSDVXXXXXXXXXXXXXXXXXXXXXXXXXXXXXHNDILLAKDTTEAFEKMVSLLSVLLSMQGAVDINKLCEEMLDNRATLQ
QQO76458.1:3860-3942 (24)	nsp7 [polyprotein=ORF1ab polyprotein] [organism=Severe acute respiratory syndrome coronavirus 2] [isolate=SARS-CoV-2/human/EGY/EGY_CCHE57357_A_90/2020]	SKMSDVKCTSVVLLSVLQQLRVESSSKLWAQCVQLHNDILLAKDTTEAFEKMVSLLSVLLAMQGAVDINKLCEEMLDNRATLQ
UJV20777.1:3860-3942 (24)	nsp7 [polyprotein=ORF1a polyprotein] [organism=Severe acute respiratory syndrome coronavirus 2] [isolate=SARS-CoV-2/human/USA/CA-CDPH-3000052189/2021]	SKMSDVKCXXXXXXXXLQQLRVESSSKLWAQCVQLHNDILLAKDTTEAFEKMVSLLSVLLSMQGAVDINKLCEEMLDNRATLQ
UBN16536.1:3860-3942 (24)	nsp7 [polyprotein=ORF1ab polyprotein] [organism=Severe acute respiratory syndrome coronavirus 2] [isolate=SARS-CoV-2/human/USA/KS-CDC-ASC210131494/2021]	SKMSDVKCTSVVLLSVLQQLRVESSSKLWAQCVQLHNDILLAXXXTEAFEKMVSLLSVLLSMQGAVDINKLCEEMLDNRATLQ
UHS51819.1:3860-3942 (24)	nsp7 [polyprotein=ORF1a polyprotein] [organism=Severe acute respiratory syndrome coronavirus 2] [isolate=SARS-CoV-2/human/USA/CA-CDPH-3000278175/2021]	SKMSDVXXXXXXXXXXLQQLRVESSSKLWAQCVQLHNDILLAKDTTEAFEKMVSLLSVLLSMQGAVDINKLCEEMLDNRATLQ
UTI91886.1:3836-3916 (23)	nsp7 [polyprotein=ORF1ab polyprotein] [organism=Severe acute respiratory syndrome coronavirus 2] [isolate=SARS-CoV-2/human/USA/MA-CDCBI-CRSP_ZO5XH7CTGELAOXFF/2022]	SKMSDVKCTSVVLLSVLQQLRVESSSKLWAQCVQLHNDILLAKDTTEAFEKMVSLLSVLLSMQGAVNKLCEEMLDNRATLQ
WCC72552.1:3574-3656 (22)	nsp7 [polyprotein=ORF1ab polyprotein] [organism=Severe acute respiratory syndrome coronavirus 2] [isolate=SARS-CoV-2/human/USA/VA-VTVAS3-GSC40712/2022]	SKMSDVKCTSVVLLXXXXXXXXXXXXXXXXXXXXXXXXXXXXXXXXXXXXXXXXXXXXXXXXXXXXXXXXXXXXXXXXXXXXX
UES90708.1:3860-3942 (22)	nsp7 [polyprotein=ORF1ab polyprotein] [organism=Severe acute respiratory syndrome coronavirus 2] [isolate=SARS-CoV-2/human/USA/WI-CDC-ASC210444902/2021]	SKMSDVKCTSVVLLSVLQQLRVESSSKLWAQCVQLHNDILLAXXTTEAFEKMVSLLSVLLSMQGAVDINKLCEEMLDNRATLQ
UJR92993.1:3853-3935 (22)	nsp7 [polyprotein=ORF1ab polyprotein] [organism=Severe acute respiratory syndrome coronavirus 2] [isolate=SARS-CoV-2/human/USA/21079908/2021]	SKMSDVKCTSVVLLSVLQQLRVESSSKLWAQCVXXXXXXXXXXXXXXXXXXXXXXLSVLLXXXXXXXXXXXXXXXXXXXXXXX
UYR71185.1:3857-3939 (22)	nsp7 [polyprotein=ORF1ab polyprotein] [organism=Severe acute respiratory syndrome coronavirus 2] [isolate=SARS-CoV-2/human/USA/PA-CDC-STM-74SMG8KMQ/2022]	SKMSDVKCTSVVLLSVLQQLRVESSSKLWAQCVQLHNDILLAKDTTEAFEKMVSLLSVLLSMQGAVDINKLCXEMLDNRATLQ
UMQ80226.1:3860-3942 (22)	nsp7 [polyprotein=ORF1ab polyprotein] [organism=Severe acute respiratory syndrome coronavirus 2] [isolate=SARS-CoV-2/human/USA/TN-VUMC-O-0028/2021]	SKMSDVKCTSVVLLSVLQQLRVESSSXXXXXXVQLHNDILLAKDTTEAFEKMVSLLSVLLSMQGAVDINKLCEEMXXXXXTLQ
WCZ77515.1:3830-3912 (22)	nsp7 [polyprotein=ORF1ab polyprotein] [organism=Severe acute respiratory syndrome coronavirus 2] [isolate=SARS-CoV-2/human/USA/60CF9155C35/2022]	SKMSDVKCTSVVLLSVLQQLRVESSSKLWAQCVQLXXDILLAKDTTEAFEKMVSLLSVLLSMQGAVDINKLCEEMLDNRATLQ
UFD39187.1:3860-3942 (22)	nsp7 [polyprotein=ORF1ab polyprotein] [organism=Severe acute respiratory syndrome coronavirus 2] [isolate=SARS-CoV-2/human/USA/IL-CDC-ASC210474030/2021]	SKMSDVKCTSVVLLSVLQQLRVESSSKLWAQCVQLHNDILLAKDTTEAFEKMVSLLSVLLSMQGAVDINKLCEEMLDXXXXXX
QZN17617.1:3855-3937 (22)	nsp7 [polyprotein=ORF1ab polyprotein] [organism=Severe acute respiratory syndrome coronavirus 2] [isolate=SARS-CoV-2/human/USA/VA-CDC-LC0192041/2021]	SKMSDVKCTSVVLLSVLQQLRVESSSKLWAQCVELHNDILLAKDTTEAFEKMVSLLSVLLSMQGAVDINKLCEEMLDNRATLQ
UIX07703.1:3856-3938 (22)	nsp7 [polyprotein=ORF1ab polyprotein] [organism=Severe acute respiratory syndrome coronavirus 2] [isolate=SARS-CoV-2/human/USA/CT-CDC-LC0454988/2021]	SKMSDVKCTSVVLLSVLQQLRVESSSKLWAQCVQLHNDILLAKDTTEAFEKMVSLLSVLLSKQGAVDINKLCEEMLDNRATLQ
QUF28128.1:3857-3939 (22)	nsp7 [polyprotein=ORF1ab polyprotein] [organism=Severe acute respiratory syndrome coronavirus 2] [isolate=SARS-CoV-2/human/USA/FL-CDC-ASC210025156/2021]	SKMSAVKCTSVVLLSVLQQLRVESSSKLWAQCVQLHNDILLAKDTTEAFEKMVSLLSVLLSMQGAVDINKLCEEMLDNRATLQ
UFD31106.1:3860-3942 (22)	nsp7 [polyprotein=ORF1ab polyprotein] [organism=Severe acute respiratory syndrome coronavirus 2] [isolate=SARS-CoV-2/human/USA/NJ-CDC-LC0371308/2021]	SKMSDVKCTSVVLLSVLQQLRVESSSKLWAQCVQLHNDILLAKDTTKAFEKMVSLLSVLLSMQGAVDINKLCEEMLDNRATLQ
QJR90355.1:3860-3942 (22)	nsp7 [polyprotein=ORF1ab polyprotein] [organism=Severe acute respiratory syndrome coronavirus 2] [isolate=SARS-CoV-2/human/AUS/VIC523/2020]	SKMSXXKCTSVVLLSVLQQLRVESSSKLWAQCVQLHNDILLAKDTTEAFEKMVSLLSVLLSMQGAVDINKLCEEMLDNRATLQ
UHY72544.1:3857-3939 (22)	nsp7 [polyprotein=ORF1ab polyprotein] [organism=Severe acute respiratory syndrome coronavirus 2] [isolate=SARS-CoV-2/human/USA/CA-CDPH-3000043997/2021]	SKMSDVKCTSVVLLSVLQQXRVESSSKLWAQCVQLHNDILLAKDTTEAFEKMVSLLSVLLSMQGAVDINKLCEEMLDNRATLQ
UDQ04484.1:3860-3942 (22)	nsp7 [polyprotein=ORF1ab polyprotein] [organism=Severe acute respiratory syndrome coronavirus 2] [isolate=SARS-CoV-2/human/USA/KY-CDC-ASC210320580/2021]	SKMSDVKCTSVVLLSVLQQLRVESSSKLWAQCVQLHNDILLAKDTXEAFEKMVSLLSVLLSMQGAVDINKLCEEMLDNRATLQ
UAL86577.1:3860-3942 (22)	nsp7 [polyprotein=ORF1ab polyprotein] [organism=Severe acute respiratory syndrome coronavirus 2] [isolate=SARS-CoV-2/human/USA/NY-CDC-QDX28155263/2021]	SKMSDVKCTSVVLLSVLQQLRVESSSKLWAQCVQLHNDILLAKNTTEAFEKMVSLLSVLLSMQGAVDINKLCEEMLDNRATLQ
UYE22029.1:3857-3939 (22)	nsp7 [polyprotein=ORF1ab polyprotein] [organism=Severe acute respiratory syndrome coronavirus 2] [isolate=SARS-CoV-2/human/NZL/22MV2803/2022]	SKMSDVKCTSVVLLSVLQQLRVESSSKLWAQCVQLHNDILLAKDTTAAFEKMVSLLSVLLSMQGAVDINKLCEEMLDNRATLQ
UIO12989.1:3860-3942 (22)	nsp7 [polyprotein=ORF1ab polyprotein] [organism=Severe acute respiratory syndrome coronavirus 2] [isolate=SARS-CoV-2/human/USA/OH-CDC-ASC210642588/2021]	SKMSDVKCTSVVLLSVLQQLRVESSSKLWAQCVQLHNDILLAKDTTEAFEKMVSLLSVLLSMQGAVXXNKLCEEMLDNRATLQ
WDV71066.1:3857-3939 (22)	nsp7 [polyprotein=ORF1ab polyprotein] [organism=Severe acute respiratory syndrome coronavirus 2] [isolate=SARS-CoV-2/human/USA/CA-CDPH-500093520/2022]	SKMSDVKCTSVVLLSVLQQLRVESSSKLWAQCVQLHNDILLAKDTTEAFEKMVSLLSVLLSMRGAVDINKLCEEMLXXXXXXX
QUJ22754.1:3860-3942 (22)	nsp7 [polyprotein=ORF1ab polyprotein] [organism=Severe acute respiratory syndrome coronavirus 2] [isolate=SARS-CoV-2/human/USA/WI-CDC-4065241-001/2021]	SKMSDVKCTSVVLLSVLQQLRVESSSKLWAQCVQLHNDILLAKDTTEAFEKMVSLLSVLLSMQGAVDINKLCEXMLDNRATLQ
UGK65579.1:3860-3942 (22)	nsp7 [polyprotein=ORF1ab polyprotein] [organism=Severe acute respiratory syndrome coronavirus 2] [isolate=SARS-CoV-2/human/USA/MI-MDHHS-SC33432/2021]	SKMSXXXXXXXVLLSVLQQLRVESSSKLWAQCVQLHNDILLAKDTTEAFEKMVSLLSVLLSMQGAVDINKLCEEMLDNRATLQ
UIK75231.1:3834-3916 (22)	nsp7 [polyprotein=ORF1ab polyprotein] [organism=Severe acute respiratory syndrome coronavirus 2] [isolate=SARS-CoV-2/human/USA/CO-CDPHE-2102475615/2021]	SKMSDVKCTSVVLLSVLQQLRVESSSKLWAQCVQLHNDIXLAKDTTEAFEKMVSLLSVLLSMQGAVDINKLCEEMLDNRATLQ
UVC55038.1:3830-3912 (20)	nsp7 [polyprotein=ORF1ab polyprotein] [organism=Severe acute respiratory syndrome coronavirus 2] [isolate=SARS-CoV-2/human/USA/CA-OC-3708/2022]	SKMSDVKCTSVVLLSVLQQLRVESSSKLXXXXXXXXXXXXXAKDTTEAFEKMVSLLSVLLSMQGAVDINKLCEEMLDNRATLQ
UIV97787.1:3857-3939 (20)	nsp7 [polyprotein=ORF1ab polyprotein] [organism=Severe acute respiratory syndrome coronavirus 2] [isolate=SARS-CoV-2/human/USA/FL-CDC-ASC210557412/2021]	SKMSDVKCTSVVLLSVLQQLRVESSSKLWAQCVQLHNDILLAKDTSEAFEKMVSLLSVLLSMQGAVDINKLCEEMLDNRATLQ
UQR43743.1:3857-3939 (20)	nsp7 [polyprotein=ORF1ab polyprotein] [organism=Severe acute respiratory syndrome coronavirus 2] [isolate=SARS-CoV-2/human/USA/TG1209184/2022]	SKMSDVKCTSVVLLSVLXQLRVESSSKLWAQCVQLHNDILLAKDTTEAFEKMVSLLSVLLSMQGAVDINKLCEEMLDNRATLQ
UJI07839.1:3860-3942 (20)	nsp7 [polyprotein=ORF1ab polyprotein] [organism=Severe acute respiratory syndrome coronavirus 2] [isolate=SARS-CoV-2/human/USA/MA-MASPHL-08979/2021]	XXXXXXXXXXXXXXXXXXXXXXXXXXXXXXXXXXXXXXILLAKDTTEAFEKMVSLLSVLLSMQGAVDINKLCEEMLDNRATLQ
QRY11184.1:3860-3942 (20)	nsp7 [polyprotein=ORF1ab polyprotein] [organism=Severe acute respiratory syndrome coronavirus 2] [isolate=SARS-CoV-2/human/USA/CO-CDPHE-2010280226/2020]	SKMSDVKCTSVVLLSVLQQLRVESSSKLWAQCVQLHNDIJLAKDTTEAFEKMVSLLSVLLSMQGAVDINKLCEEMLDNRATLQ
UIO83806.1:3859-3941 (20)	nsp7 [polyprotein=ORF1a polyprotein] [organism=Severe acute respiratory syndrome coronavirus 2] [isolate=SARS-CoV-2/human/USA/AZ-5868/2021]	XXXXXXXXXXXXXXXXLQQLRVESLSKLWAQCVQLHNDILLAKDTTEAFEKMVSLLSVLLSMQGAVDINKLCEEMLDNRATLQ
QTA54892.1:3860-3942 (20)	nsp7 [polyprotein=ORF1ab polyprotein] [organism=Severe acute respiratory syndrome coronavirus 2] [isolate=SARS-CoV-2/human/USA/MA-CDC-STM-000024269/2021]	SKMSDVKCTSVVLLSVLQQLRVESSSKLWAQCVQLHNDILLAKDTTEAFEKMVSLLSVLLSMQGAVDINKLCEEMLDNMATLQ
QXG95838.1:3857-3939 (20)	nsp7 [polyprotein=ORF1ab polyprotein] [organism=Severe acute respiratory syndrome coronavirus 2] [isolate=SARS-CoV-2/human/USA/WV120700/2021]	SKMSDVKCTSVVLLSVLQQLRVESSSKLWAQCVQLHNDILLAKDTTEAFEKMVSLLSVLLSMQGSVDINKLCEEMLDNRATLQ
UPB92075.1:3860-3942 (20)	nsp7 [polyprotein=ORF1ab polyprotein] [organism=Severe acute respiratory syndrome coronavirus 2] [isolate=SARS-CoV-2/human/FRA/IHUCOVID-002061/2020]	SKISDVKCTSVVLLSVLQQLRVESSSKLWAQCVQLHNDILLAKDTTEAFEKMVSLLSFLLSMQGAVDINKLCEEMLDNRATLQ
QRX08315.1:3860-3942 (20)	nsp7 [polyprotein=ORF1ab polyprotein] [organism=Severe acute respiratory syndrome coronavirus 2] [isolate=SARS-CoV-2/human/USA/WI-CDC-LC0004123/2021]	SKMSDVKCTSVVLLSVLQQLRVESSSKLWAQCVQLHNDILLAKDTTEAXEKMVSLLSVLLSMQGAVDINKLCEEMLDNRATLQ
WDD61281.1:3857-3939 (20)	nsp7 [polyprotein=ORF1ab polyprotein] [organism=Severe acute respiratory syndrome coronavirus 2] [isolate=SARS-CoV-2/human/USA/VA-VTVAS3-GSC41932/2023]	SKMSDVKCTSVVLLSVLQQXXXXXXXXXXXXXXXXXXXXXXXXXXXXXXXXXXXXXXXXXXXXXXXXXXXXXXXXXXXXXXXX
QUM98373.1:3857-3939 (20)	nsp7 [polyprotein=ORF1ab polyprotein] [organism=Severe acute respiratory syndrome coronavirus 2] [isolate=SARS-CoV-2/human/USA/MI-CDC-QDX23849827/2021]	SKMSDVKCTSVVILSVLQQLRVESSSKLWAQCVQLHNDILLAKDTTEAFEKMVSLLSVLLSMQGAVDINKLCEEMLDNRATLQ
USS64201.1:3857-3939 (20)	nsp7 [polyprotein=ORF1ab polyprotein] [organism=Severe acute respiratory syndrome coronavirus 2] [isolate=SARS-CoV-2/human/KEN/SS9179/2021]	SKMSDVKCTSVVLLSVLQQLRVESSSKLWAQCVQLHNDILLAKDTTEAFEKMISLLSVLLSMQGAVDINKLCEEMLDNRATLQ
QWS81570.1:3860-3942 (18)	nsp7 [polyprotein=ORF1a polyprotein] [organism=Severe acute respiratory syndrome coronavirus 2] [isolate=SARS-CoV-2/human/USA/UND-00052685/2021]	SKXXXXXXTSVVLLSVLQQLRVESSSKLWAQCVQLHNDILLAKDTTEAFEKMVSLLSVLLSMQGAVDINKLCEEMLDNRATLQ
UQH36931.1:3860-3942 (18)	nsp7 [polyprotein=ORF1ab polyprotein] [organism=Severe acute respiratory syndrome coronavirus 2] [isolate=SARS-CoV-2/human/USA/TG1210574/2021]	SKMSDVKCTSVVLLSVLQQLRVXSSSKLWAQCVQLHNDILLAKDTTEAFEKMVSLLSVLLSMQGAVDINKLCEEMLDNRATLQ
UWI69711.1:3857-3939 (18)	nsp7 [polyprotein=ORF1a polyprotein] [organism=Severe acute respiratory syndrome coronavirus 2] [isolate=SARS-CoV-2/human/USA/WI-UW-12780/2022]	SKMSDVKCTSVVLLSVLQQLRVESSSKLWAQCVQLHNDILLAKDTTEAFEKMVSLXXXXXXXXXXXXXXXXXEEMLDNRATLQ
UNO90048.1:3829-3911 (18)	nsp7 [polyprotein=ORF1a polyprotein] [organism=Severe acute respiratory syndrome coronavirus 2] [isolate=SARS-CoV-2/human/USA/ME-CDC-ASC210733505/2022]	SKMSDVKCTSVVLLXXXQQLRVESSSKLWAQCVQLHNDILLAKDTTEAFEKMVSLLSVLLSMQGAVDINKLCEEMLDNRATLQ
UZM24305.1:3857-3939 (18)	nsp7 [polyprotein=ORF1ab polyprotein] [organism=Severe acute respiratory syndrome coronavirus 2] [isolate=SARS-CoV-2/human/USA/WA-UW-22101911040/2022]	SKMSDVKCTSVVLLSVLQQLRVESSSKLWAQCVQLHNDILLAKDTTEAFEKMVSLLSVLLSMQGAVNINKLCEEMLDNRATLQ
UTE14375.1:3860-3942 (18)	nsp7 [polyprotein=ORF1ab polyprotein] [organism=Severe acute respiratory syndrome coronavirus 2] [isolate=SARS-CoV-2/human/USA/1778684/2021]	SKMSDVKCTSVVLLSVLQQLRVESSSKLWAQCVQLHNDILLAKDTTEAFEKMVSLLSVLLSMQDAVDINKLCEEMLDNRATLQ
WEW52261.1:3860-3942 (18)	nsp7 [polyprotein=ORF1a polyprotein] [organism=Severe acute respiratory syndrome coronavirus 2] [isolate=SARS-CoV-2/human/IND/2893/2023]	SKMSDVKCTSVVLLSVLQQLRVESSSKLWAQCVQLHNDILLAKDTTEAFEKMVSLLSVLLSMQXAVDINKLCEEMLDNRATLQ
UFJ30884.1:3860-3942 (18)	nsp7 [polyprotein=ORF1ab polyprotein] [organism=Severe acute respiratory syndrome coronavirus 2] [isolate=SARS-CoV-2/human/USA/CO-CDC-MMB11246529/2021]	SKMSDVKCTSVVLLSVLQQLRVESSSKLWAQXXXLHNDILLAKDTTEAFEKMVSLLSVLLSMQGAVDINKLCEEMLDNRATLQ
UTE99924.1:3833-3915 (18)	nsp7 [polyprotein=ORF1ab polyprotein] [organism=Severe acute respiratory syndrome coronavirus 2] [isolate=SARS-CoV-2/human/USA/CD-070 Nasal Swab/2022]	SKXXXXXCTSVVLLSVLQQLRVESSSKLWAQCVQLHNDILLAKDTTEAFEKMVSLLSVLLSMQGAVDINKLCEEMLDNRATLQ
UWU42835.1:3857-3939 (18)	nsp7 [polyprotein=ORF1ab polyprotein] [organism=Severe acute respiratory syndrome coronavirus 2] [isolate=SARS-CoV-2/human/USA/VI-CDC-2-6355127/2022]	SKMSDVKCTSVVLLSVLQQLRVESSSKLWAQCVQLHNDILLAKDTTEAFEKMVSLLSVLLSMQGAVDINXXXXXXXXXXXXXX
UEK17741.1:3790-3872 (18)	nsp7 [polyprotein=ORF1ab polyprotein] [organism=Severe acute respiratory syndrome coronavirus 2] [isolate=SARS-CoV-2/human/USA/CO-CDPHE-2010030548/2020]	SKMSDVKCTSVVLLSVLQQLRVESSSKLWAQCVQLHNDILSAKDTTEAFEKMVSLLSVLLSMQGAVDINKLCEEMLDNRATLQ
QSM16615.1:3857-3939 (18)	nsp7 [polyprotein=ORF1ab polyprotein] [organism=Severe acute respiratory syndrome coronavirus 2] [isolate=SARS-CoV-2/human/USA/CA-CZB-22985/2020]	SKMSDVKCTSVVLLSVLQQLRVESSSKLWAQCVQLHNDILLAKDTTEAFEKMVSLLSVLLSMQGAVDINKLCEEMLDYRATLQ
UTU56661.1:3857-3939 (18)	nsp7 [polyprotein=ORF1ab polyprotein] [organism=Severe acute respiratory syndrome coronavirus 2] [isolate=SARS-CoV-2/human/USA/CA-OC-3189/2022]	SKMSDVKCTSVVLLSVLQQLRVESSSKXXXXXXXXXXXXXXAKDTTEAFEKMVSLLSVLLSMQGAVDINKLCEEMLDNRATLQ
QQP30194.1:3860-3942 (18)	nsp7 [polyprotein=ORF1ab polyprotein] [organism=Severe acute respiratory syndrome coronavirus 2] [isolate=SARS-CoV-2/human/USA/GA-CDC-3898519-001/2020]	SKMSDVKCTSVVLLSVLQQLRVESSSKLWAQCVQLHNDILLAKDTTEAFEKMVSLLSVLLSMQGAVDINXLCEEMLDNRATLQ
UHM27937.1:3860-3942 (18)	nsp7 [polyprotein=ORF1a polyprotein] [organism=Severe acute respiratory syndrome coronavirus 2] [isolate=SARS-CoV-2/human/USA/MI-MDHHS-SC25320/2021]	SKMXXXXXXXVVLLSVLQQLRVESSSKLWAQCVQLHNDILLAKDTTEAFEKMVSLLSVLLSMQGAVDINKLCEEMLDNRATLQ
UJQ82353.1:3860-3942 (18)	nsp7 [polyprotein=ORF1a polyprotein] [organism=Severe acute respiratory syndrome coronavirus 2] [isolate=SARS-CoV-2/human/USA/OH-CDC-ASC210564926/2022]	SKMSDVKCTSVVLLSVLQQLRVESSSKLWAQCVQXXXDILLAKDTTEAFEKMVSLLSVLLSMQGAVDINKLCEEMLDNRATLQ
UFO27863.1:3860-3942 (18)	nsp7 [polyprotein=ORF1ab polyprotein] [organism=Severe acute respiratory syndrome coronavirus 2] [isolate=SARS-CoV-2/human/USA/CA-CDC-FG-174680/2021]	SKMSDVKCTSVVLLSVLQQLRVESSSKLWAQCVQLHNDILLAKDTTEAFEKMVSLLSVLLSMQGAVDINKLCXXXXXXXXXXX
USN19721.1:3856-3938 (18)	nsp7 [polyprotein=ORF1ab polyprotein] [organism=Severe acute respiratory syndrome coronavirus 2] [isolate=SARS-CoV-2/human/USA/V03308/2022]	XXXXXXXXXXXXXXXXXQQLRVESSSKLWAQCVQLHNDILLAKDTTEAFEKMVSLLSVLLSMQGAVDINKLCEEMLDNRATLQ
UBL75305.1:3860-3942 (18)	nsp7 [polyprotein=ORF1ab polyprotein] [organism=Severe acute respiratory syndrome coronavirus 2] [isolate=SARS-CoV-2/human/USA/NY-CDC-LC0258136/2021]	SKMSDVKCTSVVLLSVLQQLRVESSSKLWAQCVQLHNDILLAKDTTEAFEKLVSLLSVLLSMQGAVDINKLCEEMLDNRATLQ
UQR49842.1:3857-3939 (18)	nsp7 [polyprotein=ORF1ab polyprotein] [organism=Severe acute respiratory syndrome coronavirus 2] [isolate=SARS-CoV-2/human/USA/TG1269983/2022]	XXXXXXXXXXXXXXXXXXXXXXXXXSKLWAQCVQLHNDILLAKDTTEAFEKMVSLLSVLLSMQGAVDINKLCEEMLDNRATLQ
UFJ26629.1:3860-3942 (18)	nsp7 [polyprotein=ORF1ab polyprotein] [organism=Severe acute respiratory syndrome coronavirus 2] [isolate=SARS-CoV-2/human/USA/CO-CDC-MMB11229834/2021]	SKMSDVKCTSVVLLSVLQQLRVESSSKXXXQCVQLHNDILLAKDTTEAFEKMVSLLSVLLSMQGAVDINKLCEEMLDNRATLQ
QTP87876.1:3860-3942 (18)	nsp7 [polyprotein=ORF1ab polyprotein] [organism=Severe acute respiratory syndrome coronavirus 2] [isolate=SARS-CoV-2/human/USA/CA-CDC-ASC210016200/2021]	SKMSDVKCTSVVLLSVLQQLRVESSSKLWAQCVQSHNDILLAKDTTEAFEKMVSLLSVLLSMQGAVDINKLCEEMLDNRATLQ
UHA94763.1:3860-3942 (18)	nsp7 [polyprotein=ORF1ab polyprotein] [organism=Severe acute respiratory syndrome coronavirus 2] [isolate=SARS-CoV-2/human/USA/MI-MDHHS-SC24975/2021]	SKMSXXXXXXVVLLSVLQQLRVESSSKLWAQCVQLHNDILLAKDTTEAFEKMVSLLSVLLSMQGAVDINKLCEEMLDNRATLQ
UTV66460.1:3797-3879 (16)	nsp7 [polyprotein=ORF1a polyprotein] [organism=Severe acute respiratory syndrome coronavirus 2] [isolate=SARS-CoV-2/human/USA/RI-CDCBI-RIDOH_6LFILOQTPWB3UGZA/2022]	SKMSDVKCTSVVLLSVLQQLRVESSSKLWAQCVQLHNDILLAKDTTEAFEKMVSLLSVLLSMQGAVDINKLXEEMLDNRATLQ
QQP45031.1:3860-3942 (16)	nsp7 [polyprotein=ORF1ab polyprotein] [organism=Severe acute respiratory syndrome coronavirus 2] [isolate=SARS-CoV-2/human/USA/CA-CZB-12986/2020]	SKMSDVKCTSVVLLSVLQQLRVESSSKLWAQCVQLHNDILLAKDTTEAFEKMVSLLSVLLXMQGAVDINKLCEEMLDNRATLQ
QQP48211.1:3860-3942 (16)	nsp7 [polyprotein=ORF1ab polyprotein] [organism=Severe acute respiratory syndrome coronavirus 2] [isolate=SARS-CoV-2/human/USA/CA-CZB-13517/2020]	SXXXXXKCTSVVLLSVLQQLRVESSSKLWAQCVQLHNDILLAKDTTEAFEKMVSLLSVLLSMQGAVDINKLCEEMLDNRATLQ
UCX78425.1:3860-3942 (16)	nsp7 [polyprotein=ORF1ab polyprotein] [organism=Severe acute respiratory syndrome coronavirus 2] [isolate=SARS-CoV-2/human/USA/CA-CDPH-3000147782/2021]	SKMSDVKCTSVVLXXVLQQLRVESSSKLWAQCVQLHNDILLAKDTTEAFEKMVSLLSVLLSMQGAVDINKLCEEMLDNRATLQ
UQG78153.1:3860-3942 (16)	nsp7 [polyprotein=ORF1ab polyprotein] [organism=Severe acute respiratory syndrome coronavirus 2] [isolate=SARS-CoV-2/human/USA/TG1029019/2021]	XXXXXXXXXXXXXXXXXXXXXXXXXXXXXXXXVXLHNDILLAKDTTEAFEKMVSLLSVLLSMQGAVDINKLCEEMLDNRATLQ
QVU71380.1:3857-3939 (16)	nsp7 [polyprotein=ORF1ab polyprotein] [organism=Severe acute respiratory syndrome coronavirus 2] [isolate=SARS-CoV-2/human/USA/CA-CDC-ASC210059630/2021]	SKMSDVKCTSVVLLSVLQQLRVESSSKLWAQCVQLHNDILLAKDTTEAFEKMVSLLSVLLSMQGAVDINKLCEEMQDNRATLQ
UQG79032.1:3839-3921 (16)	nsp7 [polyprotein=ORF1ab polyprotein] [organism=Severe acute respiratory syndrome coronavirus 2] [isolate=SARS-CoV-2/human/USA/TG1068207/2021]	SKMSDVKCTSVVLLSVLQQLRVESSSKLWAQCVQLHNDILLAKDTTEAXXXXXXXXXXXXXXXXXXXXXXXXXXXXXXXXXXX
UVU02955.1:3857-3939 (16)	nsp7 [polyprotein=ORF1ab polyprotein] [organism=Severe acute respiratory syndrome coronavirus 2] [isolate=SARS-CoV-2/human/USA/VA-VTVAS3-GSC37087/2022]	SKMADVKCTSVVLLSVLQQLRVESSSKLWAQCVQLHNDILLAKDTTEAFEKMVSLLSVLLSMQGAVDINKLCEEMLDNRATLQ
UCR54754.1:3860-3942 (16)	nsp7 [polyprotein=ORF1a polyprotein] [organism=Severe acute respiratory syndrome coronavirus 2] [isolate=SARS-CoV-2/human/USA/FL-CDC-ASC210281315/2021]	SKMSDVKCTSVVLLSVLQQLRVESSSKLWAQCVQLHNDILLAXXXTEAFEKMVSLLSVLLSMQGAVDINKLCEEMLDNRATXX
UXX30401.1:3828-3910 (16)	nsp7 [polyprotein=ORF1ab polyprotein] [organism=Severe acute respiratory syndrome coronavirus 2] [isolate=SARS-CoV-2/human/USA/WA-PHL-025309/2022]	SKMSDVKCTSVVLLXXXXXXXVXXXXXXXXXXXXXXXXXXXAKDTTEAFEKMVSLLSVLLSMQGAVDINKLCEEMLDNRATLQ
UGY53592.1:3860-3942 (16)	nsp7 [polyprotein=ORF1ab polyprotein] [organism=Severe acute respiratory syndrome coronavirus 2] [isolate=SARS-CoV-2/human/USA/NC-CORVASEQ-DH-251M510000003443/2021]	SKMSDVKCTSVVLLSVLQQLRVESSSKLWAQCVQLHXDILLAKDTTEAFEKMVSLLSVLLSMQGAVDINKLCEEMLDNRATLQ
UPB98363.1:3416-3498 (16)	nsp7 [polyprotein=ORF1ab polyprotein] [organism=Severe acute respiratory syndrome coronavirus 2] [isolate=SARS-CoV-2/human/FRA/IHUCOVID-038772-NovaE/2020]	SKMSDVKCTSVVLLSVLQQLRVESSSKLWXXXXXXXXXXXXXXXXXXXXXXXXXXXXXXXXXXXXXXXXXXXXXXXXXXXXXX
UCL61379.1:3800-3882 (16)	nsp7 [polyprotein=ORF1ab polyprotein] [organism=Severe acute respiratory syndrome coronavirus 2] [isolate=SARS-CoV-2/human/USA/RI-CDCBI-RIDOH_XBLUPDQK3SN7ZBDW/2021]	SKMSDVKCTSVVLLSVLQQLRVESSSKLWAQCVQLHNDILLAKDTTEAFEKMVSLLSVLLSMQGAVDINKPCEEMLDNRATLQ
URG44355.1:3857-3939 (16)	nsp7 [polyprotein=ORF1ab polyprotein] [organism=Severe acute respiratory syndrome coronavirus 2] [isolate=SARS-CoV-2/human/USA/VA-VTVAS3-GSC34300/2022]	SKMSDVKCTSVVLLSVLQQLRVESSSKLXXXXXQLHNDILLAKDTTEAFEKMVSLLSVLLSMQGAVDINKLCEEMLDNRATLQ
UHB49778.1:3860-3942 (16)	nsp7 [polyprotein=ORF1ab polyprotein] [organism=Severe acute respiratory syndrome coronavirus 2] [isolate=SARS-CoV-2/human/USA/MI-MDHHS-SC36488/2021]	XXXXXXXXXXXXXXXXXXXXXXXXXXXXXXQCVQLHNDILLAKDTTEAFEKMVSLLSVLLSMQGAVDINKLCEEMLDNRATLQ
UBT69039.1:3860-3942 (16)	nsp7 [polyprotein=ORF1ab polyprotein] [organism=Severe acute respiratory syndrome coronavirus 2] [isolate=SARS-CoV-2/human/KEN/SS2432/2021]	SKMSDVKCTSVVLLSVLQQLRVESSSKLWAQCVQLHNDILLAKDTTEAFEKMVSLLSVLLSMPGAVDINKLCEEMLDNRATLQ
UPB01978.1:3829-3911 (16)	nsp7 [polyprotein=ORF1a polyprotein] [organism=Severe acute respiratory syndrome coronavirus 2] [isolate=SARS-CoV-2/human/FRA/IHUCOVID-065850_Nova1/2022]	SKMSDVKCTSVVLLSVLQQLRVESSSKLWAQXXXXXXXXXXAKDTTEAFEKMVSLLXXXXXXXXAVDINKLCEEMLDNRATLQ
UHT39433.1:3860-3942 (16)	nsp7 [polyprotein=ORF1ab polyprotein] [organism=Severe acute respiratory syndrome coronavirus 2] [isolate=SARS-CoV-2/human/USA/MI-MDHHS-SC37539/2021]	SKXXXXXXXXVVLLSVLQQLRVESSSKLWAQCVQLHNDILLAKDTTEAFEKMVSLLSVLLSMQGAVDINKLCEEMLDNRATLQ
UID92032.1:3860-3942 (16)	nsp7 [polyprotein=ORF1a polyprotein] [organism=Severe acute respiratory syndrome coronavirus 2] [isolate=SARS-CoV-2/human/USA/MD-CDC-ASC210566729/2021]	SKMSDVKCTSVVLLSVLQQLRVESSSKLWAQCVQXXXXILLAKDTTEAFEKMVSLLSVLLSMQGAVDINKLCEEMLDNRATLQ
UDQ33624.1:3860-3942 (16)	nsp7 [polyprotein=ORF1ab polyprotein] [organism=Severe acute respiratory syndrome coronavirus 2] [isolate=SARS-CoV-2/human/USA/MA-CDCBI-CRSP_3K73KBIFF6TIV4CD/2021]	XXXSDVKCTSVVLLSVLQQLRVESSSKLWVQCVQLHNDILLAKDTTEAFEKMVSLLSVLLSMQGAVDINKLCEEMLDNRATLQ
QTX54227.1:3860-3942 (16)	nsp7 [polyprotein=ORF1ab polyprotein] [organism=Severe acute respiratory syndrome coronavirus 2] [isolate=SARS-CoV-2/human/USA/GA-CDC-STM-000021272/2021]	SKMSDVKCTSVVLLSVLQQLRVELSSKLWAQCVQLHNDILLAKDTTEAFEKMVSLLSVLLSMQGAVDINKLCEEMLDNRATLQ
QUL70535.1:3860-3942 (16)	nsp7 [polyprotein=ORF1ab polyprotein] [organism=Severe acute respiratory syndrome coronavirus 2] [isolate=SARS-CoV-2/human/LBY/BTRC Libya SARS-CoV-2 WGS-9/2021]	XXXXXXXXXXXXXXXXXXXXRVESSSKLWAQCVQLHNDILLAKDTTEAFEKMVSLLSVLLSMQGAVDINKLCEEMLDNRATLQ
QWW38440.1:3857-3939 (16)	nsp7 [polyprotein=ORF1ab polyprotein] [organism=Severe acute respiratory syndrome coronavirus 2] [isolate=SARS-CoV-2/human/USA/CO-CDC-MMB08851490/2021]	SKMSDVKCTSVVLLSVLQQLRVESSSKLWAQSVQLHNDILLAKDTTEAFEKMVSLLSVLLSMQGAVDINKLCEEMLDNRATLQ
UDO60300.1:3860-3942 (16)	nsp7 [polyprotein=ORF1ab polyprotein] [organism=Severe acute respiratory syndrome coronavirus 2] [isolate=SARS-CoV-2/human/USA/CA-CDPH-3000208723/2021]	SKMSDVKCTSVVXXXVLQQLRVESSSKLWAQCVQLHNDILLAKDTTEAFEKMVSLLSVLLSMQGAVDINKLCEEMLDNRATLQ
UCB69502.1:3859-3941 (14)	nsp7 [polyprotein=ORF1a polyprotein] [organism=Severe acute respiratory syndrome coronavirus 2] [isolate=SARS-CoV-2/human/USA/CA-CDC-ASC210123154/2021]	XKMSDVXCTSVVLLSVLQQLRVESSSKLWAQCVQLHNDILLAKDTTEAFEKMVSLLSVLLSMQGAVDINKLCEEMLDNRATLQ
UGC91080.1:3860-3942 (14)	nsp7 [polyprotein=ORF1ab polyprotein] [organism=Severe acute respiratory syndrome coronavirus 2] [isolate=SARS-CoV-2/human/USA/CO-CDC-MMB11530714/2021]	SKMSDVKCTSVVLLSVLQQLRVXXXXXXXXXXXXXHNDILLAKDTTEAFEKMVSLLSVLLSMQGAVDINKLCEEMLDSRATLQ
UGO01892.1:3838-3920 (14)	nsp7 [polyprotein=ORF1ab polyprotein] [organism=Severe acute respiratory syndrome coronavirus 2] [isolate=SARS-CoV-2/human/USA/MI-MDHHS-SC30310/2021]	SKMXXXXCTSVVLLSVLQQLRVESSSKLWAQCVQLHNDILLAKDTTEAFEKMVSLLSVLLSMQGAVDINKLCEEMLDNRATLQ
QZK66151.1:3860-3942 (14)	nsp7 [polyprotein=ORF1ab polyprotein] [organism=Severe acute respiratory syndrome coronavirus 2] [isolate=SARS-CoV-2/human/USA/UT-UPHL-210823802546/2021]	SKMSDVKCTSVVLLSVLQQLRVETSSKLWAQCVQLHNDILLAKDTTEAFEKMVSLLSVLLSMQGAVDINKLCEEMLDNRATLQ
WDU32569.1:3856-3938 (14)	nsp7 [polyprotein=ORF1ab polyprotein] [organism=Severe acute respiratory syndrome coronavirus 2] [isolate=SARS-CoV-2/human/BRA/ILMD2201638/2022]	SKMSDVKCTSVVLLSVLQQLRVESSSKLWAQCVQLHNDILLAKDTTEAFEKMVSLLSVLLPMQGAVDINKLCEEMLDNRATLQ
UPY69338.1:3857-3939 (14)	nsp7 [polyprotein=ORF1ab polyprotein] [organism=Severe acute respiratory syndrome coronavirus 2] [isolate=SARS-CoV-2/human/USA/TG1224168/2022]	XXXXXXXXXXXXXXXXXXXXXXXXXXXXXAQCVQLHNDILLAKDTTEAFEKMVSLLSVLLSMQGAVDINKLCEEMLDNRATLQ
UOW05739.1:3860-3942 (14)	nsp7 [polyprotein=ORF1ab polyprotein] [organism=Severe acute respiratory syndrome coronavirus 2] [isolate=SARS-CoV-2/human/USA/MI-MDHHS-SC40245/2022]	SKMSDVKCTSVVLLSVLQQLRVESXXXXXXXXXQLHNDILLAKDTTEAFEKMVSLLSVLLSMQGAVDINKLCEEMLDNRATLQ
QOC66267.1:3836-3918 (14)	nsp7 [polyprotein=ORF1ab polyprotein] [organism=Severe acute respiratory syndrome coronavirus 2] [isolate=SARS-CoV-2/human/USA/CA-CZB-2505/2020]	SKMSDVKCTSVVLLSVLQQLRVEXSSKLWAQCVQLHNDILLAKDTTEAFEKMVSLLSVLLSMQGAVDINKLCEEMLDNRATLQ
UXH94266.1:3857-3939 (14)	nsp7 [polyprotein=ORF1a polyprotein] [organism=Severe acute respiratory syndrome coronavirus 2] [isolate=SARS-CoV-2/human/USA/WI-UW-10055/2022]	SKMSDVKCTSVVLLSVLQQLRVESSXXXXXXXXXXXXXXXXXXXXXXXXXXXXXXXXXXXXXXXXXXXXXXXEEMLDNRATLQ
UZV38172.1:3858-3940 (14)	nsp7 [polyprotein=ORF1ab polyprotein] [organism=Severe acute respiratory syndrome coronavirus 2] [isolate=SARS-CoV-2/human/KEN/SS10870/2021]	SKMSDVKCTSVVLLSVLQQLRVESSSKLWAQCVQLHNDILLAKDTTEAFEKMVSLLSVLLSMQGAVDINKLCEEMLDNRXXLQ
QRG51188.1:3860-3942 (14)	nsp7 [polyprotein=ORF1ab polyprotein] [organism=Severe acute respiratory syndrome coronavirus 2] [isolate=SARS-CoV-2/human/USA/UT-UPHL-2101770873/2021]	XXXXXXXXXXVVLLSVLQQLRVESSSKLWAQCIQLHNDILLAKDTTEAFEKMVSLLSVLLSMQGAVDINKLCEEMLDNRATLQ
UHI32261.1:3860-3942 (14)	nsp7 [polyprotein=ORF1ab polyprotein] [organism=Severe acute respiratory syndrome coronavirus 2] [isolate=SARS-CoV-2/human/USA/AL-CDC-ASC210391251/2021]	SKMSDVKCTSVVLLSVLQQLRVESSSKLWAQCVQLHNDILLAKDTTEAFEKMVSLLSVLLSMQGAVDINKLCEEMLDNRXXXQ
UBC38955.1:3859-3941 (14)	nsp7 [polyprotein=ORF1ab polyprotein] [organism=Severe acute respiratory syndrome coronavirus 2] [isolate=SARS-CoV-2/human/USA/CA-CDC-FG-068991/2021]	SKMSDVQCTSVVLLSVLQQLRVESSSKLWAQCVQLHNDILLAKDTTEAFEKMVSLLSVLLSMQGAVDINKLCEEMLDNRATLQ
UDP64698.1:3860-3942 (14)	nsp7 [polyprotein=ORF1ab polyprotein] [organism=Severe acute respiratory syndrome coronavirus 2] [isolate=SARS-CoV-2/human/USA/MA-CDCBI-CRSP_IZTDQRZYC66S7VKF/2021]	SKMSDVKCTSVVLLSVLHQLRVESSSKLWAQCVQLHNDILLAKDTTEAFEKMVSLLSVLLSMQGAVDINKLCEEMLDNRATLQ
UQG78917.1:3846-3928 (14)	nsp7 [polyprotein=ORF1ab polyprotein] [organism=Severe acute respiratory syndrome coronavirus 2] [isolate=SARS-CoV-2/human/USA/TG1068159/2021]	SKMSDVKCTSVVLLSVLQQLRVESSSKLWAQCVQLHNDILLAKXXXXXXXXXXXXXXXXXXXXXXXXXXXXXXXXXXXXXXXX
UHB53831.1:3860-3942 (14)	nsp7 [polyprotein=ORF1ab polyprotein] [organism=Severe acute respiratory syndrome coronavirus 2] [isolate=SARS-CoV-2/human/USA/MI-MDHHS-SC36828/2021]	XXXXXXXXXSVVLLSVLQQLRVESSSKLWAQCVQLHNDILLAKDTTEAFEKMVSLLSVLLSMQGAVDINKFCEEMLDNRATLQ
QRW68194.1:3860-3942 (14)	nsp7 [polyprotein=ORF1ab polyprotein] [organism=Severe acute respiratory syndrome coronavirus 2] [isolate=SARS-CoV-2/human/USA/GA-CDC-LC0002048/2020]	SKMSDVKCTSVVLLSVLQQLRVESSSKLWAQCVQLHNDILLAKDTTEXFEKMVSLLSVLLSMQGAVDINKLCEEMLDNRATLQ
UQR26843.1:3845-3927 (14)	nsp7 [polyprotein=ORF1ab polyprotein] [organism=Severe acute respiratory syndrome coronavirus 2] [isolate=SARS-CoV-2/human/USA/TG1163524/2022]	SKMSDVKCTSVVLLSVLQQLRXESSSKLWAQCVQLHNDILLAKDTTEAFEKMVSLLSVLLSMQGAVDINKLCEEMLDNRATLQ
UXG08686.1:3854-3936 (14)	nsp7 [polyprotein=ORF1ab polyprotein] [organism=Severe acute respiratory syndrome coronavirus 2] [isolate=SARS-CoV-2/human/USA/LA-PHL-LA-SARS2-00982/2022]	SKMSDVKCTSVVLLSVLQQLRVESSSXXXXXXXQLHNDILLAKDTXXXXXXXXXXXXXXXSMQGAVDINKLCEEMLDNRATLQ
UJJ66389.1:3856-3938 (14)	nsp7 [polyprotein=ORF1ab polyprotein] [organism=Severe acute respiratory syndrome coronavirus 2] [isolate=SARS-CoV-2/human/USA/GA-CDC-MMB12429475/2021]	SKMSDVKCTSVVLLSVLQQLRVESSSKLWAQCVQLHNDILLAKDTTEAFEKMVSXXXXXXXXXXXXXXXKLCEEMLDNRATLQ
UEV33869.1:3860-3942 (14)	nsp7 [polyprotein=ORF1ab polyprotein] [organism=Severe acute respiratory syndrome coronavirus 2] [isolate=SARS-CoV-2/human/USA/FL-CDC-STM-TXQUPDT4W/2021]	SKMSDVKCTSVVLLSVLQQLRVESLSKLWAQCVQLHNDILLAKDTTEAFEKMVSLLSVLLSMQGVVDINKLCEEMLDNRATLQ
QZU64555.1:3860-3942 (14)	nsp7 [polyprotein=ORF1ab polyprotein] [organism=Severe acute respiratory syndrome coronavirus 2] [isolate=SARS-CoV-2/human/USA/CA-CDC-ASC210208888/2021]	SKMSDVKCTSVVLLSVLQQLRVESSSKLWAQCVQLHNDILLAKDTTEAFEKMVSLLSVLLSMQGAVAINKLCEEMLDNRATLQ
URA66279.1:3857-3939 (14)	nsp7 [polyprotein=ORF1ab polyprotein] [organism=Severe acute respiratory syndrome coronavirus 2] [isolate=SARS-CoV-2/human/BRA/SP-NXBS1720GENOV701220840352/2021]	SKMSDVKCTSVVLLSVLQQLRVESSSKLWAQCVQLHNDILLAKDTTEAFEKMVSLLSVLLSMQGAVDIYKLCEEMLDNRATLQ
UPE92182.1:3860-3942 (14)	nsp7 [polyprotein=ORF1a polyprotein] [organism=Severe acute respiratory syndrome coronavirus 2] [isolate=SARS-CoV-2/human/FRA/IHUCOVID-001917/2020]	SKXXDVKCTSVVLLSVLQQLRVESSSKLWAQCVQLHNDILLAKDTTEAFEKMVSLLSVLLSMQGAVDINKLCEEMLDNRATLQ
UNU66258.1:3835-3917 (14)	nsp7 [polyprotein=ORF1ab polyprotein] [organism=Severe acute respiratory syndrome coronavirus 2] [isolate=SARS-CoV-2/human/USA/AZ-CDC-ASC210734914/2022]	SKMSDVKCTSVVLLXXXXXXXXXXXXXXXXXXXXLHNDILLAKDTTEAFEKMVSLLSVLLSMQGAVDINKLCEEMLDNRATLQ
UOW85947.1:3856-3938 (14)	nsp7 [polyprotein=ORF1ab polyprotein] [organism=Severe acute respiratory syndrome coronavirus 2] [isolate=SARS-CoV-2/human/USA/SC-COVID22-1424/2022]	SKMSDVKCTSVVLLSVLQQLRVESSSKLWAQCVXXHNDILLAKDTTEAFEKMVSLLSVLLSMQGAVDINKLCEEMLDNRATLQ
QNC69271.1:3860-3942 (14)	nsp7 [polyprotein=ORF1ab polyprotein] [organism=Severe acute respiratory syndrome coronavirus 2] [isolate=SARS-CoV-2/human/USA/Navy-CDC-3539458-001/2020]	SKMSDVKCTSVVLLSVLQQLRVESSSKLWAQCVQLHNDILLAKDTTEAFEKMVXLLSVLLSMQGAVDINKLCEEMLDNRATLQ
UPE92328.1:3847-3929 (13)	nsp7 [polyprotein=ORF1ab polyprotein] [organism=Severe acute respiratory syndrome coronavirus 2] [isolate=SARS-CoV-2/human/FRA/IHUCOVID-002349/2020]	SKMSDVKCTSVVLLSVLQQLRVEXXXXXXXXXXXXXXXXXXXXXXXXXXXXXXXXXXXXXXXXXXXXXXXXXXXXXXXXXXXX
UHR40168.1:3859-3941 (12)	nsp7 [polyprotein=ORF1a polyprotein] [organism=Severe acute respiratory syndrome coronavirus 2] [isolate=SARS-CoV-2/human/USA/OH-CDC-ASC210536745/2021]	SKMSDVKCTXXVLLSVLQQLRVESSSKLWAQCVQLHNDILLAKDTTEAFEKMVSLLSVLLSMQGAVDINKLCEEMLDNRATLQ
UBV73688.1:3860-3942 (12)	nsp7 [polyprotein=ORF1ab polyprotein] [organism=Severe acute respiratory syndrome coronavirus 2] [isolate=SARS-CoV-2/human/USA/UT-UPHL-210928570503/2021]	XXXXXXXXTSVVXLSVLQQLRVESSSKLWAQCVQLHNDILLAKDTTEAFEKMVSLLSVLLSMQGAVDINKLCEEMLDNRATLQ
UVC46440.1:3857-3939 (12)	nsp7 [polyprotein=ORF1ab polyprotein] [organism=Severe acute respiratory syndrome coronavirus 2] [isolate=SARS-CoV-2/human/USA/SC-COVID22-4180/2022]	SKMSDVKCTSVVLLSVLQQLRVESSSKLWAQCVQLHNDILLAKDTTEAFEKMVSLLSVLLSMQGAVDINKLYEEMLDNRATLQ
QTD24033.1:3860-3942 (12)	nsp7 [polyprotein=ORF1ab polyprotein] [organism=Severe acute respiratory syndrome coronavirus 2] [isolate=SARS-CoV-2/human/USA/GA-CDC-STM-000027407/2021]	SIMSDVKCTSVVLLSVLQQLRVESSSKLWAQCVQLHNDILLAKDTTEAFEKMVSLLSVLLSMQGAVDINKLCEEMLDNRATLQ
QQG31720.1:3860-3942 (12)	nsp7 [polyprotein=ORF1ab polyprotein] [organism=Severe acute respiratory syndrome coronavirus 2] [isolate=SARS-CoV-2/human/USA/VA-DCLS-2305/2020]	SKMSDVKCTSVVLLSVLQQLRVESLSKLWAQCVQLHNDILLAKDTTEAFEKMVSLLSVLLSMQGAVDINKLCEEMLDNRAILQ
UGR90112.1:3860-3942 (12)	nsp7 [polyprotein=ORF1ab polyprotein] [organism=Severe acute respiratory syndrome coronavirus 2] [isolate=SARS-CoV-2/human/USA/CA-CDC-FG-184994/2021]	SKMSDVKCTSVVLLSVLQQLRVKSSSKLWAQCVQLHNDILLAKDTTEAFEKMVSLLSVLLSMQGAVDINKLCEEMLDNRATLQ
UJI30403.1:3830-3912 (12)	nsp7 [polyprotein=ORF1ab polyprotein] [organism=Severe acute respiratory syndrome coronavirus 2] [isolate=SARS-CoV-2/human/USA/AR-UMGC-30921/2022]	SKMSDVKCTSVVLLSVLQQLRVESSSKLWAQCVQLHNDILLAKDTTEAFEKMVSXLSVLLSMQGAVDINKLCEEMLDNRATLQ
UVU02811.1:3857-3939 (12)	nsp7 [polyprotein=ORF1ab polyprotein] [organism=Severe acute respiratory syndrome coronavirus 2] [isolate=SARS-CoV-2/human/USA/VA-VTVAS3-GSC37066/2022]	SKMSDVKCTSVVLLSVLQQLRVESSSKLXXXXXXLHNDILLAKDTTEAFEKMVSLLSVLLSMQGAVDINKLCEEMLDNRATLQ
UEC80380.1:3860-3942 (12)	nsp7 [polyprotein=ORF1ab polyprotein] [organism=Severe acute respiratory syndrome coronavirus 2] [isolate=SARS-CoV-2/human/USA/SC-COVID21-4195/2021]	SKMSDVKCTSVVLLSVLQQLRVESSSKLWAQCVQLHNDILLAKDTTEAFENMVSLLSVLLSMQGAVDINKLCEEMLDNRATLQ
UQH18929.1:3838-3920 (12)	nsp7 [polyprotein=ORF1a polyprotein] [organism=Severe acute respiratory syndrome coronavirus 2] [isolate=SARS-CoV-2/human/USA/TG1109694/2021]	XXXXXXXXXXXXXXXXXXXXXXXXXXXXXXXXXXXXXXXXXXXXTTEAFEKMVSLLSVLLSMQGAVDINKLCEEMLDNRATLQ
UDI10505.1:3860-3942 (12)	nsp7 [polyprotein=ORF1ab polyprotein] [organism=Severe acute respiratory syndrome coronavirus 2] [isolate=SARS-CoV-2/human/USA/CO-CDPHE-2008312089/2020]	SKMSDVKCTSVVLLSVLQQLRVESSSKLXXXXXXXXNDILLAKDTTEAFEKMVSLLSVLLSMQGAVDINKLCEEMLDNRATLQ
UHU89828.1:3860-3942 (12)	nsp7 [polyprotein=ORF1ab polyprotein] [organism=Severe acute respiratory syndrome coronavirus 2] [isolate=SARS-CoV-2/human/USA/MA-CDCBI-CRSP_C6APESE72JT6EBQR/2021]	XKXSDVKCTSVVLLSVLQQLRVESSSKLWAQCVQLHNDILLAKDTTEAFEKMVSLLSVLLSMQGAVDINKLCEEMLDNRATLQ
UQD02888.1:3857-3939 (12)	nsp7 [polyprotein=ORF1ab polyprotein] [organism=Severe acute respiratory syndrome coronavirus 2] [isolate=SARS-CoV-2/human/FRA/IHUCOVID-062950_Nova2/2022]	SKMSDVKCTSVVXXXXXXXXXXXXXXXXXXXXXXXXXXXXXAKDTTEAFEKMVSLLSVLLSMQGAVDINKLCEEMLDNRATLQ
QXF85547.1:3860-3942 (12)	nsp7 [polyprotein=ORF1ab polyprotein] [organism=Severe acute respiratory syndrome coronavirus 2] [isolate=SARS-CoV-2/human/USA/NV-CDC-QDX25762920/2021]	SKMSDVKCTSVVLLSVLQQLRVESSSKLXXXXXXXXXXXXXXXXXXXXXXXXXXXLSVLLSMQGAVDINKLCEEMLDNRATLQ
UAK04696.1:3860-3942 (12)	nsp7 [polyprotein=ORF1ab polyprotein] [organism=Severe acute respiratory syndrome coronavirus 2] [isolate=SARS-CoV-2/human/USA/MA-CDCBI-CRSP_BXPEFLZI7V7RDDNH/2021]	SKISDVKCTSVVLLSVLQQLRVESSSXXXXXXXXXXXXXXXXXXXXXXXXXXXXXXXXXXXXXXXXXXXXXXXXXXXXXXXXX
UDK10054.1:3860-3942 (12)	nsp7 [polyprotein=ORF1ab polyprotein] [organism=Severe acute respiratory syndrome coronavirus 2] [isolate=SARS-CoV-2/human/USA/SC-CDC-ASC210094633/2021]	SKMSDVKCTSVVLLSVLQQLRVESSSKLWAQCVQLHNDILLAKDXTEAFEKMVSLLSVLLSMQGAVDINKLCEEMLDNRATXX
QPG51838.1:3860-3942 (12)	nsp7 [polyprotein=ORF1a polyprotein] [organism=Severe acute respiratory syndrome coronavirus 2] [isolate=SARS-CoV-2/human/USA/TX-DSHS-1268/2020]	SXXXXXXXXXVVLLSVLQQLRVESSSKLWAQCVQLHNDILLAKDTTEAFEKMVSLLSVLLSMQGAVDINKLCEEMLDNRATLQ
QSG72865.1:3860-3942 (12)	nsp7 [polyprotein=ORF1ab polyprotein] [organism=Severe acute respiratory syndrome coronavirus 2] [isolate=SARS-CoV-2/human/USA/PA-CDC-QDX22024623/2021]	XXXXXXXXXXXXXXXXLQQLRVESSSKLWAQCCQLHNDILLAKDTTEAFEKMVSLLSVLLSMQGVVDINKLCEEMLDNRAILQ
UPE93828.1:3859-3941 (12)	nsp7 [polyprotein=ORF1a polyprotein] [organism=Severe acute respiratory syndrome coronavirus 2] [isolate=SARS-CoV-2/human/FRA/IHUCOVID-001170/2020]	XXXXXXXXXXXXXXXXXXXXXXXXXXXXXXXXXXXXXXXXXXXXXTEAFEKMVSLLSVLLSMQGAVDINKLCEEMLDNRATLQ
WCO37960.1:3807-3889 (12)	nsp7 [polyprotein=ORF1ab polyprotein] [organism=Severe acute respiratory syndrome coronavirus 2] [isolate=SARS-CoV-2/human/USA/WV132755/2022]	SXXXXXXXXXXXXXXXXXXXXXXXXXXXXXXXXXXXXXXXXAKDTTEAFEKMVSLLSVLLSMQGAVDINKLCEEMLDNRATLQ
UZS02334.1:3830-3912 (12)	nsp7 [polyprotein=ORF1ab polyprotein] [organism=Severe acute respiratory syndrome coronavirus 2] [isolate=SARS-CoV-2/human/USA/DE-DHSS-B1207340/2022]	XXXXXXXXXXXXXXXXXXXXXXXXXXXXXXXXXXXXXXXXXXXXXXXXXXXXXXXXXXXXXXXXAVDINKLCEEMLDNRATLQ
WEX54995.1:3830-3912 (12)	nsp7 [polyprotein=ORF1ab polyprotein] [organism=Severe acute respiratory syndrome coronavirus 2] [isolate=SARS-CoV-2/human/USA/WA-PHL-016422/2022]	SKMSDVKCTSVVLLSVLQQLRVESSSKLWXXXXXXXXXXXXAKDTTEAFEKMVSLLSVLLSMQGAVDINKLCEEMLDNRATLQ
QWX79398.1:3860-3942 (12)	nsp7 [polyprotein=ORF1ab polyprotein] [organism=Severe acute respiratory syndrome coronavirus 2] [isolate=SARS-CoV-2/human/USA/UT-UPHL-2105114881/2021]	XXXXXXXXXXXVLLSVLQQLRVESSSKLWAQCIQLHNDILLAKDTTEAFEKMVSLLSVLLSMQGAVDINKLCEEMLDNRATLQ
UFJ30469.1:3860-3942 (12)	nsp7 [polyprotein=ORF1ab polyprotein] [organism=Severe acute respiratory syndrome coronavirus 2] [isolate=SARS-CoV-2/human/USA/CO-CDC-MMB11247188/2021]	SKMSDVKCTSVVLLSVLQQLRVESSSKXXXXCVQLHNDILLAKDTTEAFEKMVSLLSVLLSMQGAVDINKLCEEMLDNRATLQ
QZY59948.1:3860-3942 (12)	nsp7 [polyprotein=ORF1a polyprotein] [organism=Severe acute respiratory syndrome coronavirus 2] [isolate=SARS-CoV-2/human/RUS/RU-Sar-1618/2021]	SKMSDVKCTSVVLLSVLQQLRVESSSKLWAQCVQLHNDILLAKDTTEAFEKXXXXXXXXXXXXXXXXXXXXXXXXXXXXXXXX
UVF90206.1:3832-3914 (12)	nsp7 [polyprotein=ORF1ab polyprotein] [organism=Severe acute respiratory syndrome coronavirus 2] [isolate=SARS-CoV-2/human/USA/USA_UT-IDEL-20220727043_2022_MN908947.3/2022]	XXXXXXXXXXXXXXXXXXXXXXXXXXXXXXXXXXXXXXXXXXXXXXXXXXXXXXXXXXXXXXXGAVDINKLCEEMLDNRATLQ
QZT72172.1:3860-3942 (12)	nsp7 [polyprotein=ORF1ab polyprotein] [organism=Severe acute respiratory syndrome coronavirus 2] [isolate=SARS-CoV-2/human/USA/CA-CDC-ASC210185219/2021]	SKMSDVKCTSVVLLSVLQQLRVESLSKLWAQCVQLHNDILLAKDTTEAFEKMVSLLSVLLSMQGAVDINKLCEEMLNNRATLQ
UNW23657.1:3857-3939 (12)	nsp7 [polyprotein=ORF1ab polyprotein] [organism=Severe acute respiratory syndrome coronavirus 2] [isolate=SARS-CoV-2/human/USA/MA-Broad-CRSP_CAIJCUWY4KPTWDA7/2022]	XXXSDVKCTSVVLLSVLQQLRVESSSKLWSQCVQLHNDILLAKDTTEAFEKMVSLLSVLLSMQGAVDINKLCEEMLDNRATLQ
QVD66664.1:3857-3939 (12)	nsp7 [polyprotein=ORF1ab polyprotein] [organism=Severe acute respiratory syndrome coronavirus 2] [isolate=SARS-CoV-2/human/USA/MA-CDC-QDX24155459/2021]	XXXXXXXXXXXXXXXXLQQLRVESSSKLWAQCVQLHNDILLAKDTTEAFEKMVSLFSVLLSMQGAVDINKLCEEMLDNRATLQ
WBW14619.1:3857-3939 (12)	nsp7 [polyprotein=ORF1ab polyprotein] [organism=Severe acute respiratory syndrome coronavirus 2] [isolate=SARS-CoV-2/human/USA/TX-CDC-LC0989453/2023]	SKMSDVKCTSVVLLSVLQQLRVESSSKLWAQCVQLHNDILLAKDTTEAFEKMVSLLSVLLSMQGAVDIHKLCEEMLDNRATLQ
WAV38469.1:3857-3939 (12)	nsp7 [polyprotein=ORF1ab polyprotein] [organism=Severe acute respiratory syndrome coronavirus 2] [isolate=SARS-CoV-2/human/USA/AK-USAFSAM-S20625/2022]	SKMSDVKCTSVVLLSVLQQLRVESSSKLWAQCVQLHNDILLAKDTTEAFEKMVSLLSVLLSMRGAVDISKLCEEMLDNRATLQ
UEE01753.1:3834-3916 (12)	nsp7 [polyprotein=ORF1ab polyprotein] [organism=Severe acute respiratory syndrome coronavirus 2] [isolate=SARS-CoV-2/human/USA/CO-CDPHE-2101885295/2021]	SKMSDVKCTSVVLLSVLQQLRVESSSKLWAQCVQLHNDILLAKDTTEAFEKMVSLLAVLLSMQGAVDINKLCEEMLDNRATLQ
UAJ51292.1:3860-3942 (12)	nsp7 [polyprotein=ORF1ab polyprotein] [organism=Severe acute respiratory syndrome coronavirus 2] [isolate=SARS-CoV-2/human/USA/TX-DSHS-8200/2021]	XXXXXXXXXXXXXXXXLQQLRVESSSKLWVQCVQLHNDILLAKDTTEAFEKMVSLLSVLLSMQGAVDINKLCEEMLDNRATLQ
QTC14478.1:3851-3933 (12)	nsp7 [polyprotein=ORF1ab polyprotein] [organism=Severe acute respiratory syndrome coronavirus 2] [isolate=SARS-CoV-2/human/USA/FL-CDC-STM-000025802/2021]	SKMSDVKCTSVVLLSVLQQLRVESSSKLWAQCVQLHNDILLAKDTTEAFEKMVSLFSVLLSMQGAVDINKFCEEMLDNRATLQ
UCB74362.1:3860-3942 (12)	nsp7 [polyprotein=ORF1ab polyprotein] [organism=Severe acute respiratory syndrome coronavirus 2] [isolate=SARS-CoV-2/human/USA/RI-CDC-ASC210123538/2021]	SKMSDVKCTSVVLLSVLQQLRVESSSKLWAQCVQLHNDILLAKDTTEAFEKMVSLLSVLLSTQGAVDINKLCEEMLDNRATLQ
UPE93440.1:3860-3942 (12)	nsp7 [polyprotein=ORF1ab polyprotein] [organism=Severe acute respiratory syndrome coronavirus 2] [isolate=SARS-CoV-2/human/FRA/IHUCOVID-001826/2020]	SKMSDVKCTSVVLLSVLQQLRVESSSKLWAQCVQLHNDILLAKDTTEAFEKMVSLLSVLLSMQGAVDXXXXXXXXXXXXXXXX
WCC77100.1:3605-3687 (11)	nsp7 [polyprotein=ORF1ab polyprotein] [organism=Severe acute respiratory syndrome coronavirus 2] [isolate=SARS-CoV-2/human/USA/VA-VTVAS3-GSC41191/2022]	SKMSDVKCTSVVLLSVLXXXXXXXXXXXXXXXXXXXXXXXXXXXXXXXXXXXXXXXXXXXXXXXXXXXXXXXXXXXXXXXXXX
UFV92927.1:3860-3942 (10)	nsp7 [polyprotein=ORF1ab polyprotein] [organism=Severe acute respiratory syndrome coronavirus 2] [isolate=SARS-CoV-2/human/USA/NV-CDC-LC0391786/2021]	SKMSDVKCTSVVLLSVLQHLRVESSSKLWAQCVQLHNDILLAKDTTEAFEKMVSLLSVLLSMQGAVDINKLCEEMLDNRATLQ
UYW49272.1:3856-3938 (10)	nsp7 [polyprotein=ORF1ab polyprotein] [organism=Severe acute respiratory syndrome coronavirus 2] [isolate=SARS-CoV-2/human/USA/0-97063-4/2022]	SKMSDVKCTSVVLLSVLQQLRVXXXXXXXXXXXQLHNDILLAKDTTEAFEKMVSLLSVLLSMQGAVDINKLCEEMLDNRATLQ
UPE90721.1:3860-3942 (10)	nsp7 [polyprotein=ORF1ab polyprotein] [organism=Severe acute respiratory syndrome coronavirus 2] [isolate=SARS-CoV-2/human/FRA/IHUCOVID-001338/2020]	XXXXXXXXXXXXXXXXXXXXXXXXXXKLWAQCVQLHNDILLAKDTTEAFEKMVSLLSVLLSMQGAVDINKLCEEMLDNRATLQ
USL54614.1:3856-3938 (10)	nsp7 [polyprotein=ORF1ab polyprotein] [organism=Severe acute respiratory syndrome coronavirus 2] [isolate=SARS-CoV-2/human/USA/WA-S20779/2022]	SXXXXXXXXXXXXXXXXXXXXXXXXXXXXXXXXXLHNDILLAKDTTEAFEKMVSLLSVLLSMQGAVDINKLCEEMLDNRATLQ
UIO20571.1:3857-3939 (10)	nsp7 [polyprotein=ORF1ab polyprotein] [organism=Severe acute respiratory syndrome coronavirus 2] [isolate=SARS-CoV-2/human/USA/TN-CDC-ASC210639482/2021]	SKMSDVKCTSVVLLSVLQQLRVESSSKFWAQCVQLHNDILLAKDTTEAFEKMVSLLSVLLSMQGAVDINKLCEEMLDNRATLQ
UFJ30917.1:3860-3942 (10)	nsp7 [polyprotein=ORF1ab polyprotein] [organism=Severe acute respiratory syndrome coronavirus 2] [isolate=SARS-CoV-2/human/USA/CO-CDC-MMB11261699/2021]	SKMSDVKCTSVVLLSVLQQLRVESSSKXXXXXXXLHNDILLAKDTTEAFEKMVSLLSVLLSMQGAVDINKLCEEMLDNRATLQ
UHT05324.1:3860-3942 (10)	nsp7 [polyprotein=ORF1a polyprotein] [organism=Severe acute respiratory syndrome coronavirus 2] [isolate=SARS-CoV-2/human/USA/CA-CDPH-3000275885/2021]	SKMSDXXXXXXXXXXXLQQLRVESSSKLWAQCVQLHNDILLAKDTTEAFEKMVSLLSVLLSMQGAVDINKLCEEMLDNRATLQ
UOW87282.1:3857-3939 (10)	nsp7 [polyprotein=ORF1ab polyprotein] [organism=Severe acute respiratory syndrome coronavirus 2] [isolate=SARS-CoV-2/human/USA/SC-COVID22-2714/2022]	SKMSDVKCTSVVLLSVXXXXXXXXXXXXXXXXXXXXXXXXXAKDTTEAFEKMVSLLSVLLSMQGAVDINKLCEEMLDNRATLQ
QXL08213.1:3860-3942 (10)	nsp7 [polyprotein=ORF1ab polyprotein] [organism=Severe acute respiratory syndrome coronavirus 2] [isolate=SARS-CoV-2/human/USA/UT-CDC-ASC210154460/2021]	STMSDVKCTSVVLLSVLQQLRVESSSKLWAQCVQLHNDILLAKDTTEAFEKMVSLLSVLLSMQGAVDINKLCEEMLDNRATLQ
WCL12436.1:3857-3939 (10)	nsp7 [polyprotein=ORF1ab polyprotein] [organism=Severe acute respiratory syndrome coronavirus 2] [isolate=SARS-CoV-2/human/USA/MD-MDH-7669/2022]	SKXXXVKCTSVVLLSVLQQLRVESSSKLWAQCVQLHNDILLAKDTTEAFEKMVSLLSVLLSMQGAVDINKLCEEMLDNRATLQ
QZT92053.1:3860-3942 (10)	nsp7 [polyprotein=ORF1ab polyprotein] [organism=Severe acute respiratory syndrome coronavirus 2] [isolate=SARS-CoV-2/human/USA/GA-CDC-ASC210117186/2021]	SKMSDVKCTSVVLLSVLQQLSVESSSKLWAQCVQLHNDILLAKDTTEAFEKMVSLLSVLLSMQGAVDINKLCEEMLDNRATLQ
UPY64976.1:3857-3939 (10)	nsp7 [polyprotein=ORF1ab polyprotein] [organism=Severe acute respiratory syndrome coronavirus 2] [isolate=SARS-CoV-2/human/USA/TG1190105/2022]	XXXXXVXCTSVVLLSVLQQLRVESSSKLWAQCVQLHNDILLAKDTTEAFEKMVSLLSVLLSMQGAVDINKLCEEMLDNRATLQ
USW89551.1:3860-3942 (10)	nsp7 [polyprotein=ORF1ab polyprotein] [organism=Severe acute respiratory syndrome coronavirus 2] [isolate=SARS-CoV-2/human/USA/TG1129099/2021]	SKMSDVKCTSVVLLSVLQQLRVESSSXXXXXXXXLHNDILLAKDTTEAFEKMVSLLSVLLSMQGAVDINKLCEEMLDNRATLQ
UZW47123.1:3860-3942 (10)	nsp7 [polyprotein=ORF1a polyprotein] [organism=Severe acute respiratory syndrome coronavirus 2] [isolate=SARS-CoV-2/human/BRA/EPI_ISL_4273478/2021]	XXXXXXXXXXXXXXXXXXQLRVESSSKLWAQCVQLHNDILLAKDTTEAFEKMVSLLSVLLSMQGAVDINKLCEEMLDNRATLQ
UYB19036.1:3687-3769 (10)	nsp7 [polyprotein=ORF1ab polyprotein] [organism=Severe acute respiratory syndrome coronavirus 2] [isolate=SARS-CoV-2/human/USA/NY-CUIMC-NP-40529103/2022]	SKMSDVKCTSVVLLSXXXXXXXXXXXXXXXXXXXXXXXXXXXXXXXXXXXXXXXXXXXXXXXXXXXXXXXXXXXXXXXXXXXX
QZX52937.1:3857-3939 (10)	nsp7 [polyprotein=ORF1ab polyprotein] [organism=Severe acute respiratory syndrome coronavirus 2] [isolate=SARS-CoV-2/human/USA/UT-UPHL-210901125413/2021]	XXXXXXXXXSVVXXXVLQQLRVESSSKLWAQCVQLHNDILLAKDTTEAFEKMVSLLSVLLSMQGAVDINKLCEEMLDNRATLQ
UXO90438.1:3860-3942 (10)	nsp7 [polyprotein=ORF1ab polyprotein] [organism=Severe acute respiratory syndrome coronavirus 2] [isolate=SARS-CoV-2/human/USA/NJ-PHEL-V22041358-dup1/2022]	SKMSDVKCTSVVLLSVLQQLRVESSSKLWAQCVQLHNDILLAKDTTEAFEKMVSLLSVLLSMQGAVXXXXXXEEMLDNRATLQ
UEH38513.1:3834-3916 (10)	nsp7 [polyprotein=ORF1ab polyprotein] [organism=Severe acute respiratory syndrome coronavirus 2] [isolate=SARS-CoV-2/human/USA/CO-CDPHE-2007211539/2020]	SKMSXXKXXXXXXXXXLQQLRVESSSKLWAQCVQLHNDILLAKDTTEAFEKMVSLLSVLLSMQGAVDINKLCEEMLDNRATLQ
UOW85781.1:3856-3938 (10)	nsp7 [polyprotein=ORF1ab polyprotein] [organism=Severe acute respiratory syndrome coronavirus 2] [isolate=SARS-CoV-2/human/USA/SC-COVID22-1416/2022]	SKMSDVKCTSVVLLSVLQQLRVESSSKLWAQXXXXHNDILLAKDTTEAFEKMVSLLSVLLSMQGAVDINKLCEEMLDNRATLQ
UMW70987.1:3856-3938 (10)	nsp7 [polyprotein=ORF1ab polyprotein] [organism=Severe acute respiratory syndrome coronavirus 2] [isolate=SARS-CoV-2/human/USA/CA-OC-2059/2022]	SKMSDVKCTSVXXXXXXXXXXXXXXXXXXXXXXXXXXXXXXAKDTTEAFEKMVSLLSVLLSMQGAVDINKLCEEMLDNRATLQ
UCS81585.1:3860-3942 (10)	nsp7 [polyprotein=ORF1ab polyprotein] [organism=Severe acute respiratory syndrome coronavirus 2] [isolate=SARS-CoV-2/human/USA/MN-CDC-IBX458543438305/2021]	XXMSDXXXXSVVLLSVLQQLRVESSSKLWAQCVQLHNDILLAKDTTEAFEKMVSLLSVLLSMQGAVDINKLCEEMLDNRATLQ
QQJ44908.1:3860-3942 (10)	nsp7 [polyprotein=ORF1ab polyprotein] [organism=Severe acute respiratory syndrome coronavirus 2] [isolate=SARS-CoV-2/human/USA/UT-UPHL-2012749679/2020]	SKMSDVKCTSVVJLSVLQQLRVESSSKLWAQCVQLHNDILLAKDTTEAFEKMVSLLSVLLSMQGAVDINKLCEEMLDNRATLQ
UBZ40033.1:3859-3941 (10)	nsp7 [polyprotein=ORF1ab polyprotein] [organism=Severe acute respiratory syndrome coronavirus 2] [isolate=SARS-CoV-2/human/USA/NV-CDC-FG-138852/2021]	SKMSDVKCTSVVLLSVLQQLRVESSSKLWAQCVQLHNDILLAKDTTEAYEKMVSLLSVLLSMQGAVDINKLCEEMLDNRATLQ
UZN22267.1:3831-3913 (10)	nsp7 [polyprotein=ORF1ab polyprotein] [organism=Severe acute respiratory syndrome coronavirus 2] [isolate=SARS-CoV-2/human/USA/D8B445836LY/2022]	XXXXXXXXXXXXXXXXXXXXXXXSSSKLWAQCVQLHNDILLAKDTTEAFEKMVSLLSVLLSMQGAVDINKLCEEMLDNRATLQ
UPE94289.1:3860-3942 (10)	nsp7 [polyprotein=ORF1ab polyprotein] [organism=Severe acute respiratory syndrome coronavirus 2] [isolate=SARS-CoV-2/human/FRA/IHUCOVID-001577/2020]	SKMSDVKCTSVVLLSVLQQLRVESSSKLWAQCVQLHNDILLAKDTTEAFEKMVSLLSVLLSMQGAVDINKXXXXXXXXXXXXX
ULU59883.1:3856-3938 (10)	nsp7 [polyprotein=ORF1ab polyprotein] [organism=Severe acute respiratory syndrome coronavirus 2] [isolate=SARS-CoV-2/human/USA/B013658/2022]	XXXXXXXXXXXXXXXXXXXXXXXXXXXXXXXXXXXXXXXXXXXXXXEAFEKMVSLLSVLLSMQGAVDINKLCEEMLDNRATLQ
UFC38062.1:3860-3942 (10)	nsp7 [polyprotein=ORF1ab polyprotein] [organism=Severe acute respiratory syndrome coronavirus 2] [isolate=SARS-CoV-2/human/USA/GA-CDC-ASC210463868/2021]	SKMSDVKCTSVVLLSVLQQLRVESSSKLWAQXXQLHNDILLAKDTTEAFEKMVSLLSVLLSMQGAVDINKLCEEMLDNRATLQ
UQH44176.1:3860-3942 (10)	nsp7 [polyprotein=ORF1ab polyprotein] [organism=Severe acute respiratory syndrome coronavirus 2] [isolate=SARS-CoV-2/human/USA/TG1118182/2021]	XXMXXXXCTSVVLLSVLQQLRVESSSKLWAQCVQLHNDILLAKDTTEAFEKMVSLLSVLLSMQGAVDINKLCEEMLDNRATLQ
QXE96478.1:3857-3939 (10)	nsp7 [polyprotein=ORF1ab polyprotein] [organism=Severe acute respiratory syndrome coronavirus 2] [isolate=SARS-CoV-2/human/USA/UT-UPHL-210609973389/2021]	SKMXXXKCTSVVLLSVLQQLRVESSSKLWAQCVQLHNDILLAKDTTEAFEKMVSLLSVLLSMQGAVDINKLCEEMLDNRATLQ
UNJ28113.1:3860-3942 (10)	nsp7 [polyprotein=ORF1ab polyprotein] [organism=Severe acute respiratory syndrome coronavirus 2] [isolate=SARS-CoV-2/human/DOM/3002833691_727275/2021]	SKMSDVKXXXXXXXXXXXXXXXXXXXXXXXXXXXXHNDILLAKDTTEAFEKMVSLLSVLLSMQGAVDINKLCEEMLDNRATLQ
UYM47405.1:3627-3709 (10)	nsp7 [polyprotein=ORF1ab polyprotein] [organism=Severe acute respiratory syndrome coronavirus 2] [isolate=SARS-CoV-2/human/USA/NE-002293/2022]	XXXXXXXXXXXXXXXXXXXXXXXXXXXXXXXXXXXXXXXXXXXXXXXXXXXXXXXXXXXXXXXXXXXXXXXXEEMLDNRATLQ
UQH42657.1:3857-3939 (10)	nsp7 [polyprotein=ORF1ab polyprotein] [organism=Severe acute respiratory syndrome coronavirus 2] [isolate=SARS-CoV-2/human/USA/TG1235884/2022]	SKMSXXXCXSVVLLSVLQQLRVESSSKLWAQCVQLHNDILLAKDTTEAFEKMVSLLSVLLSMQGAVDINKLCEEMLDNRATLQ
UVD52824.1:3833-3915 (10)	nsp7 [polyprotein=ORF1ab polyprotein] [organism=Severe acute respiratory syndrome coronavirus 2] [isolate=SARS-CoV-2/human/USA/SC-COVID22-4210/2022]	XXXXXXXXXXXXXXXXXXXXXXXXXXXXXXXXXXXXXXXXLAKDTTEAFEKMVSLLSVLLSMQGAVDINKLCEEMLDNRATLQ
UHX72403.1:3860-3942 (10)	nsp7 [polyprotein=ORF1a polyprotein] [organism=Severe acute respiratory syndrome coronavirus 2] [isolate=SARS-CoV-2/human/USA/AZ-CDC-ASC210634701/2021]	SKMSDVKCTSVVLLSVLQQLRVESSSKLWAQCVQXXNDILLAKDTTEAFEKMVSLLSVLLSMQGAVDINKLCEEMLDNRATLQ
UPE97379.1:3860-3942 (10)	nsp7 [polyprotein=ORF1ab polyprotein] [organism=Severe acute respiratory syndrome coronavirus 2] [isolate=SARS-CoV-2/human/FRA/IHUCOVID-001258/2020]	SKMSDVKCTSVVLLSVLQQLRVESSSKLWAQCVQLHNDILLAKDTTEAFEKMVSLLSVLLSMQGAVDINKXXEEMLDNRATLQ
UCL60896.1:3860-3942 (10)	nsp7 [polyprotein=ORF1a polyprotein] [organism=Severe acute respiratory syndrome coronavirus 2] [isolate=SARS-CoV-2/human/USA/RI-CDCBI-RIDOH_N3YKCLGA2ASNH266/2021]	SKMSDVKCTSVVLLSVLQQLRVESSSKLWAQCVQLHNDILLAKDTTEALEKMVSLLSVLLSMQGAVDINKLCEEMLDNRATLQ
UGX56215.1:3860-3942 (10)	nsp7 [polyprotein=ORF1ab polyprotein] [organism=Severe acute respiratory syndrome coronavirus 2] [isolate=SARS-CoV-2/human/USA/GA-CDC-ASC210711205/2021]	SKMSDVKCTSVVLLSVLQQLRVESSSKLWAQCVQLHNDILLAKDTTEAFEKMVSLLSVLLSMHGAIDINKLCEEMLDNRATLQ
UTH78523.1:3833-3915 (10)	nsp7 [polyprotein=ORF1ab polyprotein] [organism=Severe acute respiratory syndrome coronavirus 2] [isolate=SARS-CoV-2/human/USA/TMCL-025/2022]	SKMSDVKCTSXXXXXXXXXXXXXXXXXXXXXXXXXXXXXXXAKDTTEAFEKMVSLLSVLLSMQGAVDINKLCEEMLDNRATLQ
UBA32280.1:3853-3935 (10)	nsp7 [polyprotein=ORF1ab polyprotein] [organism=Severe acute respiratory syndrome coronavirus 2] [isolate=SARS-CoV-2/human/USA/FL-CDC-LC0240572/2021]	SKMSDVKCTSVVLLSVLQQLRVESSSKLWAQCVQLHNDILLAKDTTEAFEKMVSLLSVLLFMQGAVDINKLCEEMLDNRATLQ
UHM29147.1:3860-3942 (10)	nsp7 [polyprotein=ORF1a polyprotein] [organism=Severe acute respiratory syndrome coronavirus 2] [isolate=SARS-CoV-2/human/USA/MI-MDHHS-SC27289/2021]	XXXXXXXXXXXXXXXXXXXXXXESSSKLWAQCVQLHNDILLAKDTTEAFEKMVSLLSVLLSMQGAVDINKLCEEMLDNRATLQ
UPE93299.1:3860-3942 (10)	nsp7 [polyprotein=ORF1ab polyprotein] [organism=Severe acute respiratory syndrome coronavirus 2] [isolate=SARS-CoV-2/human/FRA/IHUCOVID-001187/2020]	SKMSDVKCTSVVLLSVLQQLRVESSSKLWAQCVQLHNDILLAKDTTEAFEKMVSLLXVLLSMQGAVDINKLCEEMLDNRATLQ
UIO23835.1:3859-3941 (10)	nsp7 [polyprotein=ORF1ab polyprotein] [organism=Severe acute respiratory syndrome coronavirus 2] [isolate=SARS-CoV-2/human/USA/NY-CDC-ASC210640827/2021]	SKMSDVKCXXVVLLSVLQQLRVESSSKLWAQCVQLHNDILLAKDTTEAFEKMVSLLSVLLSMQGAVDINKLCEEMLDNRATLQ
UYD56874.1:3630-3712 (10)	nsp7 [polyprotein=ORF1a polyprotein] [organism=Severe acute respiratory syndrome coronavirus 2] [isolate=SARS-CoV-2/human/USA/TX-DSHS-23066/2022]	SKMSDVKCTSVVLLSVLQQLRVESSSKLWAQCVQLHNDILLAKDTTEXXXXXXXXXXXXXXXXXXXXXXXXXXXXXXXXXXXX
WEJ27662.1:3860-3942 (10)	nsp7 [polyprotein=ORF1ab polyprotein] [organism=Severe acute respiratory syndrome coronavirus 2] [isolate=SARS-CoV-2/human/USA/TG1326810/2020]	XXXXXXXXXXXXXXXXXXXXXXXXXXXXXXXXXXXXXXXLXAKDTTEAFEKMVSLLSVLLSMQGAVDINKLCEEMLDNRATLQ
ULV33109.1:3830-3912 (10)	nsp7 [polyprotein=ORF1ab polyprotein] [organism=Severe acute respiratory syndrome coronavirus 2] [isolate=SARS-CoV-2/human/USA/CO-CDPHE-2102809246/2022]	SKMSDVKCTSVVLLSVLQQLXXXXXXXXXXXXXXXXXXXXXAKDTTEAFEKMVSLLSVLLSMQGAVDINKLCEEMLDNRATLQ
UKA47212.1:3860-3942 (10)	nsp7 [polyprotein=ORF1ab polyprotein] [organism=Severe acute respiratory syndrome coronavirus 2] [isolate=SARS-CoV-2/human/USA/NYI-714/2021]	SKMSDVKCTSVVLLSVLQQLRVESSSKXXXXXXXXXXXXXXXXXXXXXXXXXXXXXXXXXXXXXXXXXXXXXXXXXXXXXXXX
UBA89242.1:3860-3942 (10)	nsp7 [polyprotein=ORF1ab polyprotein] [organism=Severe acute respiratory syndrome coronavirus 2] [isolate=SARS-CoV-2/human/USA/AZ-CDC-LC0247995/2021]	SKMSDVKCTSVVLLSVLQQLRVESSSKLWAQCVQLHNDILLAKDTTEAFEKMVSLLSVLLSMQGAVDINKLCEEMLANRATLQ
UGO75079.1:3860-3942 (8)	nsp7 [polyprotein=ORF1ab polyprotein] [organism=Severe acute respiratory syndrome coronavirus 2] [isolate=SARS-CoV-2/human/USA/NC-CDC-MMB11567720/2021]	SKMSDVKCTSVVLLSVLQQLRVESSSKLWAQCVQLHNDILLAKDTTEAFEKXXXXXXXXXXXXXAVDINKLCEEMLDNRATLQ
QQP15528.1:3860-3942 (8)	nsp7 [polyprotein=ORF1ab polyprotein] [organism=Severe acute respiratory syndrome coronavirus 2] [isolate=SARS-CoV-2/human/USA/UT-UPHL-2101958415/2020]	SXXXDVKCTSVVLLSVLQQLRVESSSKLWAQCVQLHNDILLAKDTTEAFEKMVSLLSVLLSMQGAVDINKLCEEMLDNRATLQ
WBQ23585.1:3623-3705 (8)	nsp7 [polyprotein=ORF1a polyprotein] [organism=Severe acute respiratory syndrome coronavirus 2] [isolate=SARS-CoV-2/human/USA/CO-CDPHE-2103743094/2022]	XXXXXXXXXXXXXXXXXXXXXXXXXXXXXXXXXXXXXXXXXXXXXXXXXXXXXXXXXXXXXXXXXXXXNKLCEEMLDNRATLQ
UQD02492.1:3829-3911 (8)	nsp7 [polyprotein=ORF1ab polyprotein] [organism=Severe acute respiratory syndrome coronavirus 2] [isolate=SARS-CoV-2/human/FRA/IHUCOVID-063000_Nova1/2022]	SKMSDVKCTSVVLLSVLQQLRVESSSKLWAQXXXXXXXXXXAKDTTEAFEKMVSLLXXXXXXXXXXXXXXXXXXXXXXXXXXX
WCH69917.1:3857-3939 (8)	nsp7 [polyprotein=ORF1ab polyprotein] [organism=Severe acute respiratory syndrome coronavirus 2] [isolate=SARS-CoV-2/human/USA/CO-CDPHE-2103756051/2022]	XXXXXXXXXXXXXXXXXXXXXXXXXXXXXXXXXXXXXXXXXAKDTTEAFEKMVSLLSILLSMQGAVDINKLCEEMLDNRATLQ
QVW63631.1:3857-3939 (8)	nsp7 [polyprotein=ORF1ab polyprotein] [organism=Severe acute respiratory syndrome coronavirus 2] [isolate=SARS-CoV-2/human/USA/MN-CDC-IBX727272002919/2021]	SKMSDVKCTSVVLLSVLQQLRVESSSKLWAECVQLHNDILLAKDTTEAFEKMVSLLSVLLSMQGAVDINKLCEEMLDNRATLQ
QZG13031.1:3860-3942 (8)	nsp7 [polyprotein=ORF1ab polyprotein] [organism=Severe acute respiratory syndrome coronavirus 2] [isolate=SARS-CoV-2/human/USA/CO-CDC-MMB09548950/2021]	SKMSDVKCTSVVLLSVLQQLRVESSSXXWAQXVQLHNDILLAKDTTEAFEKMVSLLSVLLSMQGAVDINKLCEEMLDNRATLQ
UJT98648.1:3860-3942 (8)	nsp7 [polyprotein=ORF1ab polyprotein] [organism=Severe acute respiratory syndrome coronavirus 2] [isolate=SARS-CoV-2/human/USA/LA-BIE-BP349/2022]	SXXSDVKXXSVVLLSVLQQLRVESSSKLWAQCVQLHNDILLAKDTTEAFEKMVSLLSVLLSMQGAVDINKLCEEMLDNRATLQ
UDI63063.1:3860-3942 (8)	nsp7 [polyprotein=ORF1ab polyprotein] [organism=Severe acute respiratory syndrome coronavirus 2] [isolate=SARS-CoV-2/human/USA/NC-CDC-ASC210331109/2021]	SKMSDVKCTSVVLLSVLQQLRVESSSKLWAQCVQLHNDILLAXXXXXAFEKMVSLLSVLLSMQGAVDINKLCEEMLDNRAXXX
USR06085.1:3834-3916 (8)	nsp7 [polyprotein=ORF1a polyprotein] [organism=Severe acute respiratory syndrome coronavirus 2] [isolate=SARS-CoV-2/human/USA/CO-CDPHE-2103311484/2022]	XKMSDVKCTSVVLLXXLQQLRVESSSKLWAQCVQLHNDILLAKDTTEAFEKMVSLLSVLLSMQGAVDINKLCEEMLDNRATLQ
UOZ39623.1:3833-3915 (8)	nsp7 [polyprotein=ORF1ab polyprotein] [organism=Severe acute respiratory syndrome coronavirus 2] [isolate=SARS-CoV-2/human/USA/NJ-CDC-ASC210848248/2022]	SKMSDVKCTSVVLLXXXXXXXXXXXXXXXXXXXXXXNDILLAKDTTEAFEKMVSLLSVLLSMQGAVDINKLCEEMLDNRATLQ
UPE93085.1:3777-3859 (8)	nsp7 [polyprotein=ORF1ab polyprotein] [organism=Severe acute respiratory syndrome coronavirus 2] [isolate=SARS-CoV-2/human/FRA/IHUCOVID-001415/2020]	SKMSDVKCTSVVLLSVLQQLRVESSSKLWAQCVQLHNXXXXXXXXXXXXXXXXXXXXXXXXXXXXXXXXXXXXXXXXXXXXXX
UUI81673.1:3857-3939 (8)	nsp7 [polyprotein=ORF1ab polyprotein] [organism=Severe acute respiratory syndrome coronavirus 2] [isolate=SARS-CoV-2/human/USA/MA-MGB-07493/2022]	SKMSDVKCTSVVLLSVLQQLRVESSSKLWAQCVQLHNDILLAKDTTEAFEKMVSLLSVLLSMQGAVBINKLCEEMLDNRATLQ
UML08957.1:3856-3938 (8)	nsp7 [polyprotein=ORF1ab polyprotein] [organism=Severe acute respiratory syndrome coronavirus 2] [isolate=SARS-CoV-2/human/USA/NM-UNM-ED01492/2022]	SKMSDVKCTSVVLLSVLQQLRVEXXXXXXXXXXXLHNDILLAKDTTEAFEKMVSLLSVLLSMQGAVDINKLCEEMLDNRATLQ
UNA53056.1:3857-3939 (8)	nsp7 [polyprotein=ORF1ab polyprotein] [organism=Severe acute respiratory syndrome coronavirus 2] [isolate=SARS-CoV-2/human/USA/CO-CDC-MMB14345896/2022]	SKMSDVKCTSVVLLSVLQQLRVXXXXXXXXXXXXXXNDILLAKDTTEAFEKMVSLLSVLLSMQGAVDINKLCEEMLDNRATLQ
WED47178.1:3857-3939 (8)	nsp7 [polyprotein=ORF1a polyprotein] [organism=Severe acute respiratory syndrome coronavirus 2] [isolate=SARS-CoV-2/human/USA/CA-CDPH-500089212/2022]	XXXXXXXXXXXXXXXXXXXXXXXXXXXXXXXXXXXXXXXXXXXXXXXXXXXXXXXXXXXXXXXXXXDINKLCEEMLDNRATLQ
UEM53216.1:3860-3942 (8)	nsp7 [polyprotein=ORF1ab polyprotein] [organism=Severe acute respiratory syndrome coronavirus 2] [isolate=SARS-CoV-2/human/USA/FL-CDC-ASC210094757/2021]	SKMSDVKCTSVVLLSVLQQHRVESSSKLWAQCVQLHNDILLAKDTTEAFEKMVSLLSVLLSMQGAVDINKLCEEMLDNRATLQ
UNJ55410.1:3835-3917 (8)	nsp7 [polyprotein=ORF1ab polyprotein] [organism=Severe acute respiratory syndrome coronavirus 2] [isolate=SARS-CoV-2/human/USA/KY-CDC-ASC210732990/2022]	SKMSDVKCTSVVLLXXXXXXXXXXXXXXXXXXXXXHNDILLAKDTTEAFEKMVSLLSVLLSMQGAVDINKLCEEMLDNRATLQ
UEU87286.1:3860-3942 (8)	nsp7 [polyprotein=ORF1ab polyprotein] [organism=Severe acute respiratory syndrome coronavirus 2] [isolate=SARS-CoV-2/human/USA/MN-CDC-IBX463777597280/2021]	XXMSDVKXTSVVLLSVLQQLRVESSSKLWAQCVQLHNDILLAKDTTEAFEKMVSLLSVLLSMQGAVDINKLCEEMLDNRATLQ
WES18011.1:3857-3939 (8)	nsp7 [polyprotein=ORF1ab polyprotein] [organism=Severe acute respiratory syndrome coronavirus 2] [isolate=SARS-CoV-2/human/USA/CA-CDC-LC1026787/2023]	SKMSDVKCTSVVLLSVLQQLRVESSSKLWAQCVQLHNDILLAKDTTEAFEKMVSLLSVLLSMQGAVDINKLCEEMLDKRATLQ
UIQ18170.1:3860-3942 (8)	nsp7 [polyprotein=ORF1ab polyprotein] [organism=Severe acute respiratory syndrome coronavirus 2] [isolate=SARS-CoV-2/human/USA/MA-CDCBI-CRSP_QWIOJTI3RWZXLDTB/2022]	SKISDVKCTSVVLLSVLQQLRVESSSKLWAQCVXXXXXXXXXXXXXXXXXXXXXXXXXXXXXXXXXXXXXXXXXXXXXXXXXX
UFD24217.1:3860-3942 (8)	nsp7 [polyprotein=ORF1ab polyprotein] [organism=Severe acute respiratory syndrome coronavirus 2] [isolate=SARS-CoV-2/human/USA/CO-CDC-MMB11223369/2021]	SKMSDVKCTSVVLLSVLQQLRVESSSXXXXXXXXXXXDILLAKDTTEAFEKMVSLLSVLLSMQGAVDINKLCEEMLDSRATLQ
UYY61565.1:3835-3917 (8)	nsp7 [polyprotein=ORF1ab polyprotein] [organism=Severe acute respiratory syndrome coronavirus 2] [isolate=SARS-CoV-2/human/USA/WA-S21979/2022]	SKMSDVKCTSVVLLSVLQQLRVESSXXXXXXXVQLHNDILLAKDTTEAFEKMVSLLSVLLSMQGAVDINKLCEEMLDNRATLQ
QSH61101.1:3860-3942 (8)	nsp7 [polyprotein=ORF1ab polyprotein] [organism=Severe acute respiratory syndrome coronavirus 2] [isolate=SARS-CoV-2/human/USA/CO-CDPHE-2100369294/2021]	SKMSDVKCTSVVLLSVLQQLRVESSSKLWAQCVQLHNDILLAKDTTEAFEKMVSLLSVLLSMQGTVDINKLCEEMLDNRATLQ
QRX56970.1:3857-3939 (8)	nsp7 [polyprotein=ORF1ab polyprotein] [organism=Severe acute respiratory syndrome coronavirus 2] [isolate=SARS-CoV-2/human/USA/CA-CDC-LC0013662/2021]	SKMSDVKCTSVVLLSVLQQLRVESSSKLWAQCFQLHNDILLAKDTTEAFEKMVSLLSVLLSMQGAVDINKLCEEMLDNRATLQ
UTK59798.1:3839-3921 (8)	nsp7 [polyprotein=ORF1ab polyprotein] [organism=Severe acute respiratory syndrome coronavirus 2] [isolate=SARS-CoV-2/human/USA/WA-S21122/2022]	SKMSDVKCTSVVLLSVLQQLRVESSSKLWAQCVQLHNDILLAKDTTEAFEKMVSLLSVLLSMQGAVDTNKFCEEMLDNRATLQ
UWV87147.1:3857-3939 (8)	nsp7 [polyprotein=ORF1ab polyprotein] [organism=Severe acute respiratory syndrome coronavirus 2] [isolate=SARS-CoV-2/human/USA/UT-UPHL-220909175867/2022]	SKMSDVKCTSVVLLSVLQQLRVESSSKLWAQCVQLHNDILLAKDTTEAFEKMVSLLSVLLSMQGAVDIDKLCEEMLDNRATLQ
UOA62384.1:3856-3938 (8)	nsp7 [polyprotein=ORF1ab polyprotein] [organism=Severe acute respiratory syndrome coronavirus 2] [isolate=SARS-CoV-2/human/USA/VA-VTVAS3-GSC29263/2022]	SKMSDVKCTSXXXXXXXXXXXXXXXXXXXXXXXXXXXXXXXXXXXXXXXXXXXXXXXXXXXXXXXXXXXXXXXXXXXXXXXXX
UGL17253.1:3860-3942 (8)	nsp7 [polyprotein=ORF1ab polyprotein] [organism=Severe acute respiratory syndrome coronavirus 2] [isolate=SARS-CoV-2/human/USA/MO-CDC-ASC210482845/2021]	SKMSDVKCTSVVLLSVLQQLRVESSSKLWAQCVQLHNDILLAKDITEAFEKMVSLLSVLLSMQGAVDINKLCEEMLDNRTTLQ
WCD58966.1:3850-3932 (8)	nsp7 [polyprotein=ORF1ab polyprotein] [organism=Severe acute respiratory syndrome coronavirus 2] [isolate=SARS-CoV-2/human/USA/MD-MDH-7751/2022]	XXXXXXXXXXXXXXXXXXXXXXXXXXXXXXXXXXXXXXXXXAKDTTEAFEKMVSLLSVLLSMQGAVDINKLCEEILDNRATLQ
UGA68105.1:3834-3916 (8)	nsp7 [polyprotein=ORF1ab polyprotein] [organism=Severe acute respiratory syndrome coronavirus 2] [isolate=SARS-CoV-2/human/USA/MXGX596733/2021]	SKMSDVKCTSVVLLSVLQQLRVESSSKLWAQCVQLHXXILLAKDTTEAFEKMVSLLSVLLSMQGAVDINKLCEEMLDNRATLQ
UQD17631.1:3833-3915 (8)	nsp7 [polyprotein=ORF1ab polyprotein] [organism=Severe acute respiratory syndrome coronavirus 2] [isolate=SARS-CoV-2/human/FRA/IHUCOVID-066871_Nova1/2022]	XXXXXXXXXXXXXXXXXXXXXXXXXXXXXXXXXXXXXXXXXAKDTTEAFEKMVSLLXXXXXXXXAVDINKLCEEMLDNRATLQ
UQG76154.1:3838-3920 (8)	nsp7 [polyprotein=ORF1ab polyprotein] [organism=Severe acute respiratory syndrome coronavirus 2] [isolate=SARS-CoV-2/human/USA/TG1028215/2021]	XXXXXXXXXXXXXXXXXXXXXXXXXXXXXXXXXXXXXDXLLAKDTTEAFEKMVSLLSVLLSMQGAVDINKLCEEMLDNRATLQ
UQH39592.1:3856-3938 (8)	nsp7 [polyprotein=ORF1ab polyprotein] [organism=Severe acute respiratory syndrome coronavirus 2] [isolate=SARS-CoV-2/human/USA/TG1222431/2022]	SKMSDVKCTSVVLXXXXXXXXXXXXXXXXXXXXQLHNDILLAKDTTEAFEKMVSLLSVLLSMQGAVDINKLCEEMLDNRATLQ
UXG45223.1:3857-3939 (8)	nsp7 [polyprotein=ORF1ab polyprotein] [organism=Severe acute respiratory syndrome coronavirus 2] [isolate=SARS-CoV-2/human/USA/LA-PHL-LAPH000303/2022]	SKMSDVKCTSVVLLSVLQQLRVESSSXXXXXXXQLHNDILLAKDTXXXXXXXXXXXXXXXSMQGAVDINKLCEEMXXXXXXXQ
WCC76443.1:3569-3651 (8)	nsp7 [polyprotein=ORF1ab polyprotein] [organism=Severe acute respiratory syndrome coronavirus 2] [isolate=SARS-CoV-2/human/USA/VA-VTVAS3-GSC41134/2022]	SKMSDVKCTSVVLLSVLQQLRXXXXXXXXXXXXXXXXXXXXXXXXXXXXXXXXXXXXXXXXXXXXXXXXXXXXXXXXXXXXXX
UDZ16509.1:3860-3942 (8)	nsp7 [polyprotein=ORF1ab polyprotein] [organism=Severe acute respiratory syndrome coronavirus 2] [isolate=SARS-CoV-2/human/USA/AK-CDC-LC0335261/2021]	SKMSDLKCTSVVLLSVLQQLRVESSSKLWAQCVQLHNDILLAKDTTEAFGKMVSLLSVLLSMQGAVDINKLCEEMLDNRATLQ
UPE93002.1:3794-3876 (8)	nsp7 [polyprotein=ORF1ab polyprotein] [organism=Severe acute respiratory syndrome coronavirus 2] [isolate=SARS-CoV-2/human/FRA/IHUCOVID-000011/2020]	SKMSDVKCTSVVLLSVLQQLRVESSSKLWAQCVQLHNDILLAXXXXXXXXXXXXXXXXXXXXXXXXXXXXXXXXXXXXXXXXX
UPD11027.1:3860-3942 (8)	nsp7 [polyprotein=ORF1ab polyprotein] [organism=Severe acute respiratory syndrome coronavirus 2] [isolate=SARS-CoV-2/human/FRA/IHUCOVID-010036_Illu1/2021]	SKMSDVKCTSVVLLSVLQQLRVESSSKLWAQCVQLHNDILXXXXXXXXXXXXXXXXXXXXXXXXXXXXXXXXXXXXXXXXXXX
UNN78274.1:3857-3939 (8)	nsp7 [polyprotein=ORF1ab polyprotein] [organism=Severe acute respiratory syndrome coronavirus 2] [isolate=SARS-CoV-2/human/USA/CA-CDPH-500046623/2022]	SKMSDVKCTSVVLXXXXXXXXXXXXXXXXXXXXXXXXXXXXXXXXXXXXXXXXXXXXXXXXXXXXXXXXXXXXXXXXXXXXXX
QVJ63055.1:3857-3939 (8)	nsp7 [polyprotein=ORF1ab polyprotein] [organism=Severe acute respiratory syndrome coronavirus 2] [isolate=SARS-CoV-2/human/USA/PA-CDC-ASC210069112/2021]	SKMSDVKCTSVVLLSVLQQLRVESSSKLWAQCVQLHNDILLAKXTTEAFEKMVSLLSVLLSMQGAVDINKLCEEMLDNRAXXX
UDN86271.1:3860-3942 (8)	nsp7 [polyprotein=ORF1ab polyprotein] [organism=Severe acute respiratory syndrome coronavirus 2] [isolate=SARS-CoV-2/human/USA/MS-MSPHL-0476/2021]	SKMSDVKCTSVVLLSVLQQLRVESSSKLWAQCVXXXXXXXXXXXXXXXXXXMVSLXXXXXXXXXXXXXXXXXXXXXXXXXXXX
UKA89475.1:3822-3904 (8)	nsp7 [polyprotein=ORF1ab polyprotein] [organism=Severe acute respiratory syndrome coronavirus 2] [isolate=SARS-CoV-2/human/USA/21083226/2021]	SKMSDVKCTSVVLLSVLQQLRVESSSKLWAQCVQLHNDILLAKDTTEAFEKMVSLLSVLLSMQGAVDINKLXXXXXXXXXXXX
USV30382.1:3860-3942 (8)	nsp7 [polyprotein=ORF1ab polyprotein] [organism=Severe acute respiratory syndrome coronavirus 2] [isolate=SARS-CoV-2/human/USA/TX-HHD-580125/2020]	SKMSDVKCTSVVLLSVLQQLRVESSSKLWAQCVQLHNDILLAKDTTEAFEKMVSLLSVLLSMQGAVDXXXXXEEMLDNRATLQ
UTS05650.1:3857-3939 (8)	nsp7 [polyprotein=ORF1ab polyprotein] [organism=Severe acute respiratory syndrome coronavirus 2] [isolate=SARS-CoV-2/human/USA/NJ-CDC-LC0757825/2022]	SKMSDVKCTSVVLLSVLQQLRVESPSKLWAQCVQLHNDILLAKDTTEAFEKMVSLLSVLLSMQGAVDINKLCEEMLDNRATLQ
UMO47092.1:3857-3939 (8)	nsp7 [polyprotein=ORF1ab polyprotein] [organism=Severe acute respiratory syndrome coronavirus 2] [isolate=SARS-CoV-2/human/USA/CO-CDC-MMB14137554/2022]	SKMSDVKCTSVVLLSVLQQLRVESSXXXXXXXXXXHNDILLAKDTTEAFEKMVSLLSVLLSMQGAVDINKLCEEMLDNRATLQ
QWX80296.1:3860-3942 (8)	nsp7 [polyprotein=ORF1ab polyprotein] [organism=Severe acute respiratory syndrome coronavirus 2] [isolate=SARS-CoV-2/human/USA/UT-UPHL-2105430378/2021]	XKMSDVXXXSVVLLSVLQQLRVESSSKLWAQCVQLHNDILLAKDTTEAFEKMVSLLSVLLSMQGAVDINKLCEEMLDNRATLQ
ULS89683.1:3856-3938 (8)	nsp7 [polyprotein=ORF1ab polyprotein] [organism=Severe acute respiratory syndrome coronavirus 2] [isolate=SARS-CoV-2/human/USA/MD-CDC-MMB14085854/2022]	SKMSDVKCTSVVLLSVLQQLRVEXXXXXXXXXXXXHNDILLAKDTTEAFEKMVSLLSVLLSMQGAVDINKLCEEMLDNRATLQ
UBF52873.1:3861-3943 (8)	nsp7 [polyprotein=ORF1ab polyprotein] [organism=Severe acute respiratory syndrome coronavirus 2] [isolate=SARS-CoV-2/human/USA/TX-CDC-ASC210118344/2021]	XXMSXXXXTSVVLLSVLQQLRVESSSKLWAQCVQLHNDILLAKDTTEAFEKMVSLLSVLLSMQGAVDINKLCEEMLDNRATLQ
UBR87836.1:3859-3941 (8)	nsp7 [polyprotein=ORF1ab polyprotein] [organism=Severe acute respiratory syndrome coronavirus 2] [isolate=SARS-CoV-2/human/USA/CA-CDC-FG-130326/2021]	SKMSDVKCTSVVLLSVLQQLRVESSSKLWAQCVQLHNXXXXXXXXXXXXXXXXXXXXXXXXXXXXXXXXKLCEEMLNNRATLQ
UFC56678.1:3860-3942 (8)	nsp7 [polyprotein=ORF1ab polyprotein] [organism=Severe acute respiratory syndrome coronavirus 2] [isolate=SARS-CoV-2/human/USA/VA-CDC-ASC210464504/2021]	SKMSDVKCTSVVLLSVLQQLRVESSSKLWAQCVQLHNDILLAXXTTEAFEKMVSLLSVLLSMQGAVDINKLCEEMLDNRATXX
UDP99730.1:3860-3942 (8)	nsp7 [polyprotein=ORF1ab polyprotein] [organism=Severe acute respiratory syndrome coronavirus 2] [isolate=SARS-CoV-2/human/USA/CA-CDC-ASC210381047/2021]	SKMSDVKCTSVVLLSVLQQLRVESSSKLWAQCVQLHNDILLAKDTTEAFEKMVSLLSVLLSMQGAVDINKLCEEMLDNRAXLX
ULA14330.1:3856-3938 (8)	nsp7 [polyprotein=ORF1ab polyprotein] [organism=Severe acute respiratory syndrome coronavirus 2] [isolate=SARS-CoV-2/human/USA/SD-SDAIHG-0239/2022]	SKMSDVKCTSVVLLSVLQQLRVESSSKLWAQCVQLHNDILLAKDTTEAFEKMVXXXXXXXXXXXXXXINKLCEEMLDNRATLQ
WCH08117.1:3856-3938 (8)	nsp7 [polyprotein=ORF1ab polyprotein] [organism=Severe acute respiratory syndrome coronavirus 2] [isolate=SARS-CoV-2/human/USA/FL-BPHL-16124/2022]	SKMSDVKCTSVVLLSVLQQLRVESSSKLWAQCVQLHNDILLAKDXXXXXXXXXXXXXXXXXXXXXXXXXXXXXXXXXXXXXXX
UAQ38138.1:3860-3942 (8)	nsp7 [polyprotein=ORF1a polyprotein] [organism=Severe acute respiratory syndrome coronavirus 2] [isolate=SARS-CoV-2/human/USA/GA-CDC-ASC210192748/2021]	SKMSDVKCTSVVLLSVLQQLRVESSSKLWAQCVQLHNDILLAKXXTEAFEKMVSLLSVLLSMQGAVDINKLCEEMLDNRATXX
UKG35350.1:3860-3942 (8)	nsp7 [polyprotein=ORF1a polyprotein] [organism=Severe acute respiratory syndrome coronavirus 2] [isolate=SARS-CoV-2/human/USA/NC-CORVASEQ-DUG14YVN7532220125A5/2022]	SKMXXXXXTSVVLLSVLQQLRVESSSKLWAQCVQLHNDILLAKDTTEAFEKMVSLLSVLLSMQGAVDINKLCEEMLDNRATLQ
UIG97690.1:3860-3942 (8)	nsp7 [polyprotein=ORF1ab polyprotein] [organism=Severe acute respiratory syndrome coronavirus 2] [isolate=SARS-CoV-2/human/USA/TX-HHD-4393713/2020]	SKMSDVKCTSVVLLSVLQQLRVESSSKLWAQCVQLHNDILLAKDTTEAFEKMVSLLSVLLSMQGAVDINXXCEEMLDNRATLQ
UDO98322.1:3860-3942 (8)	nsp7 [polyprotein=ORF1ab polyprotein] [organism=Severe acute respiratory syndrome coronavirus 2] [isolate=SARS-CoV-2/human/USA/PA-CDC-STM-000741744/2021]	SKMSDVKCTSVVLLSVLQQLRVESSSKLWAQCVQLHNDILLDKDTTEAFEKMVSLLSVLLSMQGAVDINKLCEEMLDNRATLQ
UPB51225.1:3852-3934 (8)	nsp7 [polyprotein=ORF1ab polyprotein] [organism=Severe acute respiratory syndrome coronavirus 2] [isolate=SARS-CoV-2/human/FRA/IHUCOVID-058008_Nova1/2022]	XXXXXXXXXXXXXXXXLXQLRVESSSKLWAQCVQLHNDILLAKDTTEAFEKMVSLLSVLLSMQGAVDINKLCEEMLDNRATLQ
UEY11719.1:3834-3916 (8)	nsp7 [polyprotein=ORF1ab polyprotein] [organism=Severe acute respiratory syndrome coronavirus 2] [isolate=SARS-CoV-2/human/USA/AR-UMGC-18486/2021]	SKMSDVKCTSVVLLSVLQQLRVESSSKLWAQCVQLHXXXXXXXXXXXXXXXXXXXLSVLLSMQGAVDINKLCEEMLDNRATLQ
UUB57765.1:3857-3939 (8)	nsp7 [polyprotein=ORF1ab polyprotein] [organism=Severe acute respiratory syndrome coronavirus 2] [isolate=SARS-CoV-2/human/USA/CA-CDC-LC0785071/2022]	SKMTDVKCTSVVLLSVLQQLRVESSSKLWAQCVQLHNDILLAKDTTEAFEKMVSLLSVLLSMQGAVDINKLCEEMLDNRATLQ
QJS54860.1:3860-3942 (8)	nsp7 [polyprotein=ORF1ab polyprotein] [organism=Severe acute respiratory syndrome coronavirus 2] [isolate=SARS-CoV-2/human/USA/CA-CZB-1114/2020]	SKMSDVKCTSVVLLSVLQQLRVESSSKLWAQCVQLHNDILLAKDTTEAFEKMVSLLSVLLSMQGAVDINKLCEEMLXXRATLQ
QNO84201.1:3860-3941 (8)	nsp7 [polyprotein=ORF1ab polyprotein] [organism=Severe acute respiratory syndrome coronavirus 2] [isolate=SARS-CoV-2/human/AUS/VIC5741/2020]	SKMSDVKCTSVVLLSVLQQLRVESSSKLWAQCVQLHNDILLAKDTEAFEKMVSLLSVLLSMQGAVDINKLCEEMLDNRATLQ
UJM82333.1:3856-3938 (8)	nsp7 [polyprotein=ORF1ab polyprotein] [organism=Severe acute respiratory syndrome coronavirus 2] [isolate=SARS-CoV-2/human/USA/NC-CDC-ASC210562130/2021]	SKMSDVKCTSVVLLSVLQQLRVESSSKLWAQCVQLHNDILLAKDTTEAFEKMVSLLSVLLSMQGAVDINKLCEEMLENRATLQ
UJJ66365.1:3856-3938 (8)	nsp7 [polyprotein=ORF1ab polyprotein] [organism=Severe acute respiratory syndrome coronavirus 2] [isolate=SARS-CoV-2/human/USA/CO-CDC-MMB12407927/2021]	SKMSDVKCTSVVLLSVLQQLRVESSSKLWAQCVQLHNDILLAKDTTEAFEKMVSLXXXXXXXXXAVDINKLCEEMLDNRATLQ
UQH48029.1:3860-3942 (8)	nsp7 [polyprotein=ORF1ab polyprotein] [organism=Severe acute respiratory syndrome coronavirus 2] [isolate=SARS-CoV-2/human/USA/TG1222801/2021]	SKMSDVKCTSVVLLSVLQQLRVESSSKXXAQCVQLHNDILLAKDTTEAFEKMVSLLSVLLSMQGAVDINKLCEEMLDNRATLQ
QYP52662.1:3860-3942 (8)	nsp7 [polyprotein=ORF1ab polyprotein] [organism=Severe acute respiratory syndrome coronavirus 2] [isolate=SARS-CoV-2/human/USA/TN-CDC-ASC210156518/2021]	SKMSDVKCTSVVLLSVLQQLRVESSSKLWAQCVQLHNDILLAKDTTEAFEKMVSLLSVLLSMQGAVXINKLCEEMLDNRATXX
ULH76014.1:3860-3942 (8)	nsp7 [polyprotein=ORF1ab polyprotein] [organism=Severe acute respiratory syndrome coronavirus 2] [isolate=SARS-CoV-2/human/IND/INSACOG-GBRC1387/2021]	SKMSDVKCTSVVLLSVLQQLRVESSSKLWAQCVQLHNDILLAKDTTEAFEKMVSLLSVLLSMQGAVDINKLCEXXXXXXXXXX
ULG06494.1:3860-3942 (8)	nsp7 [polyprotein=ORF1ab polyprotein] [organism=Severe acute respiratory syndrome coronavirus 2] [isolate=SARS-CoV-2/human/USA/MI-MDHHS-SC39360/2022]	SKMSDVKCTSVVLLSVLQQLRVESXXXXXXXXVQLHNDILLAKDTTEAFEKMVSLLSVLLSMQGAVDINKLCEEMLDNRATLQ
QZM00354.1:3860-3942 (8)	nsp7 [polyprotein=ORF1ab polyprotein] [organism=Severe acute respiratory syndrome coronavirus 2] [isolate=SARS-CoV-2/human/USA/RI-CDCBI-RIDOH_YARMCITSZ2I44ECO/2021]	XXXXXXKCTSVVLLSVLQQLRVESSSKLWAQCIQLHNDILLAKDTTEAFEKMVSLLSVLLSMQGAVDINKLCEEMLDNRATLQ
UGR99165.1:3860-3942 (8)	nsp7 [polyprotein=ORF1ab polyprotein] [organism=Severe acute respiratory syndrome coronavirus 2] [isolate=SARS-CoV-2/human/USA/WI-CDC-FG-185172/2021]	SKMSDVKCTSVVLLSVLQQLRVESSSTLWAQCVQLHNDILLAKDTTEAFEKMVSLLSVLLSMQGAVDINKLCEEMLDNRATLQ
UQH14581.1:3857-3939 (8)	nsp7 [polyprotein=ORF1ab polyprotein] [organism=Severe acute respiratory syndrome coronavirus 2] [isolate=SARS-CoV-2/human/USA/TG1122450/2021]	SKMSDVKCTSVVLLSVLQQLRVXXXXXXXXXXVQLHNDILLAKDTTEAFEKMVSLLSVLLSMQGAVDINKLCEEMLDNRATLQ
UJV10327.1:3860-3942 (8)	nsp7 [polyprotein=ORF1ab polyprotein] [organism=Severe acute respiratory syndrome coronavirus 2] [isolate=SARS-CoV-2/human/USA/CA-CDPH-3000037119/2021]	SKMSDVKCTSVVXXSVLQQLRVESSSKLWAQCVQLHNDILLAKDTTEAFEKMVSLLSVLLSMQGAVDINKLCEEMLDNRATLQ
UZS02843.1:3857-3939 (8)	nsp7 [polyprotein=ORF1ab polyprotein] [organism=Severe acute respiratory syndrome coronavirus 2] [isolate=SARS-CoV-2/human/USA/DE-DHSS-B1227109/2022]	XXXXXXXXXSVVLLXXXXXXXXXXXXXXXXXXXXXXXXXXXAKDTTEAFEKMVSLLSVLLSMQGAVDINKLCEEMLDNRATLQ
UPC83210.1:3631-3713 (8)	nsp7 [polyprotein=ORF1ab polyprotein] [organism=Severe acute respiratory syndrome coronavirus 2] [isolate=SARS-CoV-2/human/FRA/IHUCOVID-016123-NovaE1/2020]	XXXXXXXXXSVVLLSVLQQLRVESSFKLWAQCVQLHNDILLAKDTTEAFEKMVSLLSVLLSMQGAVDINKLCEEMLDNRATLQ
UVB92500.1:3837-3919 (8)	nsp7 [polyprotein=ORF1ab polyprotein] [organism=Severe acute respiratory syndrome coronavirus 2] [isolate=SARS-CoV-2/human/USA/TG1361532/2022]	XXXXXXXXXXXXXXXXXXXXXXXXXXXXXXXXXXXXXXXXXXXXXXXXXXXXXXXXXXXXXXXXXXXXXXXXXXXXXXXXXLQ
UQR44951.1:3857-3939 (8)	nsp7 [polyprotein=ORF1ab polyprotein] [organism=Severe acute respiratory syndrome coronavirus 2] [isolate=SARS-CoV-2/human/USA/TG1209772/2021]	SKMSDVKXXXVVLLSVLQQLRVESSSKLWAQCVQLHNDILLAKDTTEAFEKMVSLLSVLLSMQGAVDINKLCEEMLDNRATLQ
QTP25612.1:3860-3942 (8)	nsp7 [polyprotein=ORF1ab polyprotein] [organism=Severe acute respiratory syndrome coronavirus 2] [isolate=SARS-CoV-2/human/USA/UMW22514736/2020]	XXXXXXXXXSVVLLSVLQQLRVESSSKLWAQCVQLHNDILLAKDTTEAXEKMVSLLSVLLSMQGAVDINKLCEEMLDNRATLQ
UHB06755.1:3833-3915 (8)	nsp7 [polyprotein=ORF1ab polyprotein] [organism=Severe acute respiratory syndrome coronavirus 2] [isolate=SARS-CoV-2/human/USA/CO-CDPHE-2102060468/2021]	SKMSDVKCTSVVLLSVLQQLRVESSSKLWAQCVQLHNDILLAKDTTEAFEKMVSXXXXXXXXXXXXXXXXXXXXXXXXXXXXX
WBR04767.1:3857-3939 (8)	nsp7 [polyprotein=ORF1ab polyprotein] [organism=Severe acute respiratory syndrome coronavirus 2] [isolate=SARS-CoV-2/human/USA/AZ-CDC-STM-E83DJQJH7/2022]	SKMSDVKCTSVVLLSVLQQLRVESTSKLWAQCVQLHNDILLAKDTTEAFEKMVSLLSVLLSMQGAVDINKLCEEMLDNRATLQ
QYV20253.1:3860-3942 (8)	nsp7 [polyprotein=ORF1ab polyprotein] [organism=Severe acute respiratory syndrome coronavirus 2] [isolate=SARS-CoV-2/human/USA/MA-CDCBI-CRSP_XTNBLGPJD2VVPQYQ/2021]	SKXXXXKCTSVVLLSVLQQLRVESSSKLWAQCVQLHNDILLAKDTTEAFEKMVSLLSVLLSMQGAVDINKLCEEMLDNRATLQ
UHN06711.1:3860-3942 (8)	nsp7 [polyprotein=ORF1ab polyprotein] [organism=Severe acute respiratory syndrome coronavirus 2] [isolate=SARS-CoV-2/human/USA/CO-CDC-LC0422707/2021]	SKMSDVKCTSVVLLSVLQQLRVESSSKLWAQCVQLHNDILLAKDTTEAFEKMVSLLSVLLSMQGAVDINKLCEEMLDHRATLQ
BDY07353.1:3800-3879 (7)	nsp7 [polyprotein=ORF1a polyprotein] [organism=Severe acute respiratory syndrome coronavirus 2] [isolate=SARS-CoV-2/human/JPN/SZ-NTC-168/2023]	SDVKCTSVVLLSVLQQLRVESSSKLWAQCVQLHNDILLAKDTTEAFEKMVSLLSVLLSMQGAVDINKLCEEMLDNRATLQ
UKZ31372.1:3836-3918 (6)	nsp7 [polyprotein=ORF1ab polyprotein] [organism=Severe acute respiratory syndrome coronavirus 2] [isolate=SARS-CoV-2/human/USA/FL-CDC-ASC210546684/2022]	SKMSDVKCTSVVLXXXXXXXXXXXXXXXXXXXVQLHNDILLAKDTTEAFEKMVSLLSVLLSMQGAVDINKLCEEMLDNRATLQ
WFG84365.1:3830-3912 (6)	nsp7 [polyprotein=ORF1ab polyprotein] [organism=Severe acute respiratory syndrome coronavirus 2] [isolate=SARS-CoV-2/human/USA/WA-PHL-018378/2022]	SKXSDVKCTSVXXXXXXXXXXXXXXXXXXXXXXXXXXXXXXAKDTTEAFEKMVSLLSVLLSMQGAVDINKLCEEMLDNRATLQ
UMA97750.1:3835-3917 (6)	nsp7 [polyprotein=ORF1ab polyprotein] [organism=Severe acute respiratory syndrome coronavirus 2] [isolate=SARS-CoV-2/human/USA/FL-CDC-ASC210818785/2022]	SKMSDVKCTSVVLLSVLQQLRVESSSKLWAQCVQLHNDILLAKDTTEAFEKMVSLLSVLLSMQGAVEINKLCEEMLDNRATLQ
UYL52460.1:3857-3939 (6)	nsp7 [polyprotein=ORF1ab polyprotein] [organism=Severe acute respiratory syndrome coronavirus 2] [isolate=SARS-CoV-2/human/USA/DE-DHSS-B1227322/2022]	SKMSDVKCTSVVLLSVLQQLRVESSSKLWAQCVQLHNDILLAKDTTEAFEKMVXXXXXXXXXXXXXXXXXXXXXXXXXXXXXX
UTB19240.1:3857-3939 (6)	nsp7 [polyprotein=ORF1ab polyprotein] [organism=Severe acute respiratory syndrome coronavirus 2] [isolate=SARS-CoV-2/human/USA/UT-UPHL-220628031992/2022]	SKMSDVKCTSVVLLSVLQQLRVESSSKLWAQCVQLHNDILLAKDTTEAFEKMVSLLSVLLSMQGAVDINKLCEEMLDNKATLQ
ULA14365.1:3856-3938 (6)	nsp7 [polyprotein=ORF1ab polyprotein] [organism=Severe acute respiratory syndrome coronavirus 2] [isolate=SARS-CoV-2/human/USA/SD-SDAIHG-0243/2022]	XXXXXXXXXXXXLLSVLQQLRVESSSKLWAQCVQLHNDILLAKDTTEAFEKMVXXXXXXXXXXXXXXINKLCEEMLDNRATLQ
UPE90697.1:3860-3942 (6)	nsp7 [polyprotein=ORF1ab polyprotein] [organism=Severe acute respiratory syndrome coronavirus 2] [isolate=SARS-CoV-2/human/FRA/IHUCOVID-001965/2020]	SKMSDVKCTSVVLLSVLQQLRVEXXXXXXXXXXXXXXXXXXXXXXTEAFEKMVSLLSVLLSMQGAVDINKLCEEMLDNRATLQ
UDO73387.1:3860-3942 (6)	nsp7 [polyprotein=ORF1a polyprotein] [organism=Severe acute respiratory syndrome coronavirus 2] [isolate=SARS-CoV-2/human/USA/CA-CDPH-3000192183/2021]	SKMSDVKCTSXXXXXVLQQLRVESSSKLWAQCVQLHNDILLAKDTTEAFEKMVSLLSVLLSMQGAVDINKLCEEMLDNRATLQ
QZX34818.1:3860-3942 (6)	nsp7 [polyprotein=ORF1ab polyprotein] [organism=Severe acute respiratory syndrome coronavirus 2] [isolate=SARS-CoV-2/human/USA/CA-CDC-ASC210203983/2021]	SKMSDVKCTSVVLLSVLQQLRVESSSKLWAQCVQLHNDILLAXXXXEAFEKMVSLLSVLLSMQGAVDINKLCEEMLDNRATLQ
QQY88670.1:3860-3942 (6)	nsp7 [polyprotein=ORF1a polyprotein] [organism=Severe acute respiratory syndrome coronavirus 2] [isolate=SARS-CoV-2/human/USA/MA-MASPHL-00476/2020]	XXXXXXXCXSVVLLSVLQQLRVESSSKLWAQCVQLHNDILLAKDTTEAFEKMVSLLSVLLSMQGAVDINKLCEEMLDNRATLQ
WCZ76475.1:3607-3689 (6)	nsp7 [polyprotein=ORF1ab polyprotein] [organism=Severe acute respiratory syndrome coronavirus 2] [isolate=SARS-CoV-2/human/USA/47ECF8B1FTW/2022]	SKMSDVKCTSVVLLSVLQQLRVESSSKLWAQCVQLHNDILLAKDTTEAFEKMVSLLXXXXXMQGAVDINKLCEEMLDNRATLQ
UXX27863.1:3833-3915 (6)	nsp7 [polyprotein=ORF1ab polyprotein] [organism=Severe acute respiratory syndrome coronavirus 2] [isolate=SARS-CoV-2/human/USA/WA-PHL-024606/2022]	XXXXXXXXTSVVLXXXXXXXXXXXXXXXXXXXXXXXXXXXXAKDTTEAFEKMVSLLSVLLSMQGAVDINKLCEEMLDNRATLQ
UDN86132.1:3860-3942 (6)	nsp7 [polyprotein=ORF1ab polyprotein] [organism=Severe acute respiratory syndrome coronavirus 2] [isolate=SARS-CoV-2/human/USA/MS-MSPHL-0510/2021]	SKMSDVKCTSVVLLSVLQQLRVESSSKLWAQCVXXXXXXXXXXXXXXXXXXXXXXXXXXXXXQGAVXXXXXXXXXXXXXXXXX
UWI68709.1:3742-3824 (6)	nsp7 [polyprotein=ORF1a polyprotein] [organism=Severe acute respiratory syndrome coronavirus 2] [isolate=SARS-CoV-2/human/USA/WI-UW-12699/2022]	SKMSDVKCTSVVLLSVLQQLRVESSSKLWAQCVQLHNDILLAKDTTEAFEXXXXXXXXXXXXXXXXXXXXXXXXXXXXXXXXX
QWX80959.1:3860-3942 (6)	nsp7 [polyprotein=ORF1ab polyprotein] [organism=Severe acute respiratory syndrome coronavirus 2] [isolate=SARS-CoV-2/human/USA/UT-UPHL-2105659401/2021]	SKMSDVXXXSVVLLSVLQQLRVESSSKLWAQCIQLHNDILLAKDTTEAFEKMVSLLSVLLSMQGAVDINKLCEEMLDNRATLQ
UOM65999.1:3860-3942 (6)	nsp7 [polyprotein=ORF1ab polyprotein] [organism=Severe acute respiratory syndrome coronavirus 2] [isolate=SARS-CoV-2/human/KEN/SS7121/2021]	XXXXXXXXXXXXXXXXXXXXXXXXXXXXXXXXXXXXXXXXXAKDTTEAFEKMVSLLSVLLSIQGAVDINKLCEEMLDNRATLQ
UKT08372.1:3835-3917 (6)	nsp7 [polyprotein=ORF1ab polyprotein] [organism=Severe acute respiratory syndrome coronavirus 2] [isolate=SARS-CoV-2/human/USA/NM-CDC-ASC210688001/2022]	XXXXXXXXXXXXXXXXXXXXXVESSSXXXXXXXXLHNDILLAKDTTEAFEKMVSLLSVLLSMQGAVDINKLCEEMLDNRATLQ
UIB35181.1:3860-3942 (6)	nsp7 [polyprotein=ORF1ab polyprotein] [organism=Severe acute respiratory syndrome coronavirus 2] [isolate=SARS-CoV-2/human/USA/IL-CDC-ASC210638007/2021]	SKMSDVKCTSVVLLSVLQQLRVESSSKLWAQCVQLHNDILLAKXXXEAFEKMVSLLSVLLSMQGAVDINKLCEEMLDNRATLQ
UPP02906.1:3860-3942 (6)	nsp7 [polyprotein=ORF1ab polyprotein] [organism=Severe acute respiratory syndrome coronavirus 2] [isolate=SARS-CoV-2/human/USA/VA-VTVAS3-GSC32149/2022]	SKMSDVKCTSVVLLSVLQQLRVESSSKLWAQCXXLHNDILLAKDTTEAFEKMVSLLSVLLSMQGAVDINKLCEEMLDNRATLQ
WBO36220.1:3857-3939 (6)	nsp7 [polyprotein=ORF1ab polyprotein] [organism=Severe acute respiratory syndrome coronavirus 2] [isolate=SARS-CoV-2/human/USA/FL-CDC-QDX44996376/2022]	SKMSDVKCTSVVLLSVLQQLRVESSSKLWAQCVQLHNDILLAKDTTEAFEKMVSLFSVLLSMQGAVDINKLCEEMLDNRVTLQ
UFO18057.1:3860-3942 (6)	nsp7 [polyprotein=ORF1a polyprotein] [organism=Severe acute respiratory syndrome coronavirus 2] [isolate=SARS-CoV-2/human/USA/PA-CDC-ATM-W9Z79E4HN/2021]	SKMSDVKCTSVVLLSVLQQLRVESSSKLWAQCVXXXNDILLAKDTTEAFEKMVSLLSVLLSMQGAVDINKLCEEILDNRATLQ
UQH50270.1:3860-3942 (6)	nsp7 [polyprotein=ORF1ab polyprotein] [organism=Severe acute respiratory syndrome coronavirus 2] [isolate=SARS-CoV-2/human/USA/TG1228603/2021]	SKMSDVKCTSVVLLSVLQQLRVESSSKXWXQCVQLHNDILLAKDTTEAFEKMVSLLSVLLSMQGAVDINKLCEEMLDNRATLQ
WAP39332.1:3709-3791 (6)	nsp7 [polyprotein=ORF1ab polyprotein] [organism=Severe acute respiratory syndrome coronavirus 2] [isolate=SARS-CoV-2/human/LAO/LOMWRU-0575/2022]	SKMSDVKCTSVVLLSVLQQLRVESSXXXXXXXXXXXXXXXXXXXXXXXXXXXXXXXXXXXSMQGAVDINKLCEEMLDNRATLQ
URO17124.1:3857-3939 (6)	nsp7 [polyprotein=ORF1ab polyprotein] [organism=Severe acute respiratory syndrome coronavirus 2] [isolate=SARS-CoV-2/human/USA/FL-CDC-STM-BGYWB7A9F/2022]	SKMSDVKCTSVVLLSVLQQLRIESSSKLWAQCVQLHNDILLAKDTTEAFEKMVSLLSVLLSMQGAVDMNKLCEEMLDNRATLQ
UPN85172.1:3830-3857 (6)	nsp7 [polyprotein=ORF1a polyprotein] [organism=Severe acute respiratory syndrome coronavirus 2] [isolate=SARS-CoV-2/human/USA/CO-CDPHE-2102944525/2022]	SKMSDVKCTSVVLLSVLQQLRVESSSKL
QTN91942.1:3857-3939 (6)	nsp7 [polyprotein=ORF1ab polyprotein] [organism=Severe acute respiratory syndrome coronavirus 2] [isolate=SARS-CoV-2/human/USA/NY-CDC-LC0031511/2021]	SKMSDVKCTSVVLLSVLQQLRVXXSSKLWAQCVQLHNDILLAKDTTEAFEKMVSLLSVLLSMQGAVDINKLCEEMLDNRATLQ
UIX16872.1:3860-3942 (6)	nsp7 [polyprotein=ORF1ab polyprotein] [organism=Severe acute respiratory syndrome coronavirus 2] [isolate=SARS-CoV-2/human/USA/GA-CDC-ASC210572945/2021]	SKMSDVKCTSXVLLSVLQQLRVESSSKLXXQCVQLHNDILLAKDTTEAFEKMVSLLSVLLSMQGAVDINKLCEEMLDNRATLQ
UGO68834.1:3860-3942 (6)	nsp7 [polyprotein=ORF1ab polyprotein] [organism=Severe acute respiratory syndrome coronavirus 2] [isolate=SARS-CoV-2/human/USA/NC-CDC-MMB11562989/2021]	SKMSDVKCTSVVLLSVLQQLRVESSSXXXXXCVQLHNDILLAKDTTEAFEKMVSLLSVLLSMQGAVDINKLCEEMLDNRATLQ
UFD48748.1:3860-3942 (6)	nsp7 [polyprotein=ORF1ab polyprotein] [organism=Severe acute respiratory syndrome coronavirus 2] [isolate=SARS-CoV-2/human/USA/FL-CDC-ASC210450411/2021]	SKMSDVKCTSVVLLSVLQQLRVESSSKLWAQCVQLHNDILXXKDTTEAFEKMVSLLSVLLSMQGAVDINKLCEEMLDNRAXXX
UEH28243.1:3834-3916 (6)	nsp7 [polyprotein=ORF1ab polyprotein] [organism=Severe acute respiratory syndrome coronavirus 2] [isolate=SARS-CoV-2/human/USA/CO-CDPHE-2007201901/2020]	SKMSDVKXXXXXXXXXLQQLRVESLSKLWAQCVQLHNDILLAKDTTEAFEKMVSLLSVLLSMQGAVDINKLCEEMLDNRATLQ
UEZ45946.1:3860-3942 (6)	nsp7 [polyprotein=ORF1ab polyprotein] [organism=Severe acute respiratory syndrome coronavirus 2] [isolate=SARS-CoV-2/human/USA/NH-CDCBI-CRSP_CDSOA6RJV7HDSOXS/2021]	SKMSDVKCTSVVLLSVLLQLRVESSSKLWAQCVQLHNDILLAKDTTEAFEKMVSLLSVLLSMQGAVDINKLCEEMLDNRATLQ
QYT52934.1:3858-3940 (6)	nsp7 [polyprotein=ORF1ab polyprotein] [organism=Severe acute respiratory syndrome coronavirus 2] [isolate=SARS-CoV-2/human/USA/CA-CDC-FG-060910/2021]	SKMSDVKCTSVVLLSVLQQLRVESSFKLWVQCVQLHNDILLAKDTTEAFEKMVSLLSVLLSMQGAVDINKLCEEMLDNRATLQ
URF95698.1:3797-3879 (6)	nsp7 [polyprotein=ORF1ab polyprotein] [organism=Severe acute respiratory syndrome coronavirus 2] [isolate=SARS-CoV-2/human/USA/MA-CDCBI-CRSP_KYWBKWSZAHTGBL4V/2022]	XXXSDVKCTSVVLLSVLQQLRVESSSKLWAQCVQLHNDVLLAKDTTEAFEKMVSLLSVLLSMQGAVDINKLCEEMLDNRATLQ
ULV52024.1:3860-3942 (6)	nsp7 [polyprotein=ORF1ab polyprotein] [organism=Severe acute respiratory syndrome coronavirus 2] [isolate=SARS-CoV-2/human/IND/INSACOG-GBRC1406/2021]	SKMSDVKCTSVVLLSVLQQLRVESSSKLWAQCVQLHNDILLAKDTTEAFEKMVSLLSVLLSMQGAVDIXXXXXXXXXXXXXXX
QXR93962.1:3860-3942 (6)	nsp7 [polyprotein=ORF1ab polyprotein] [organism=Severe acute respiratory syndrome coronavirus 2] [isolate=SARS-CoV-2/human/USA/WA-CDC-UW21070611939/2021]	SKMSDVKCSSVVLLSVLQQLRVESSSKLWAQCVQLHNDILLAKDTTEAFEKMVSLLSVLLSMQGAVDINKLCEEMLDNRATLQ
WEI59519.1:3857-3939 (6)	nsp7 [polyprotein=ORF1ab polyprotein] [organism=Severe acute respiratory syndrome coronavirus 2] [isolate=SARS-CoV-2/human/USA/OSPHL08267/2023]	XXXXXXXXXXXXXXXXXXXXXXXXXXXXXXXXXXXXXXXXXXXXXXXXXXXXXXXXXXXXXXXXXXXXXXXXXXXLDNRATLQ
WEP66550.1:3727-3809 (6)	nsp7 [polyprotein=ORF1a polyprotein] [organism=Severe acute respiratory syndrome coronavirus 2] [isolate=SARS-CoV-2/human/USA/PR-CVL-001639/2022]	SKMSDVKCTSVVLLSVLQQLRVESSSKLWAQCVQLHNXXLLAKDTTEAFEKMVSLLSVLLSMQGAVDINKLCEEMLDNRATLQ
UHN21530.1:3594-3676 (6)	nsp7 [polyprotein=ORF1ab polyprotein] [organism=Severe acute respiratory syndrome coronavirus 2] [isolate=SARS-CoV-2/human/USA/NH-CDC-LC0424034/2021]	SKMSDVKCTSVVLLSVLQQLRVESSSKLWAQCVQLHNDILLAKDTTEAFEKMVSLLSALLFMQGAVDINKLCEEMLDNRATLQ
UZY81635.1:3857-3939 (6)	nsp7 [polyprotein=ORF1ab polyprotein] [organism=Severe acute respiratory syndrome coronavirus 2] [isolate=SARS-CoV-2/human/USA/UT-UPHL-221118931207/2022]	SKMSDVKCTSVVLLSVLQQLRVESSSKLWAQCVQLHNDILLAKDTTEAFEKMVSLFSVLLSMQGAVDINKLCEEMLDNRAILQ
UKC40099.1:3860-3942 (6)	nsp7 [polyprotein=ORF1a polyprotein] [organism=Severe acute respiratory syndrome coronavirus 2] [isolate=SARS-CoV-2/human/USA/MA-UMASSMED-P011H05/2021]	SKMSDVKCTXXXLLSVLQQLRVESSSKLWAQCVQLHNDILLAKDTTEAFEKMVSLLSVLLSMQGAVDINKLCEEMLDNRATLQ
UQG77846.1:3838-3920 (6)	nsp7 [polyprotein=ORF1ab polyprotein] [organism=Severe acute respiratory syndrome coronavirus 2] [isolate=SARS-CoV-2/human/USA/TG1058743/2021]	XXXXXXXXXXXXXXXXXXXXXXXXXXXXXXXXXXXXXXXXXXXXXXXXXXXXXXLLSVLLSMQGAVDINKLCEEMLDNRATLQ
WEP69934.1:3708-3790 (6)	nsp7 [polyprotein=ORF1a polyprotein] [organism=Severe acute respiratory syndrome coronavirus 2] [isolate=SARS-CoV-2/human/USA/PR-CVL-003162/2022]	SKMSDVKCTSVVLLSVLQQLRVESSSKLWAQCVQLXXXXXLAKDTTEAFEKMVSLLSVLLSMQGAVDINKLCEEMLDNRATLQ
QSV75867.1:3860-3942 (6)	nsp7 [polyprotein=ORF1ab polyprotein] [organism=Severe acute respiratory syndrome coronavirus 2] [isolate=SARS-CoV-2/human/USA/NM-CDC-QDX22440491/2021]	XXXXXXXXXXXXXXXXLQQLRVESSSKLWAQCIQLHNDILLAKDTTEAFEKMVSLLSVLLSMQGAVDINKFCEEMLDNRATLQ
UJR03595.1:3776-3858 (6)	nsp7 [polyprotein=ORF1ab polyprotein] [organism=Severe acute respiratory syndrome coronavirus 2] [isolate=SARS-CoV-2/human/USA/21081975/2021]	SKMSDVKCTSVVLLSVLQQLRVESSSKLWAQCVXXXXXXXXXXXXXXXXXXXXXXXXXXXXXXXXXXXXXXXEEMLXXXXXXX
QTV33184.1:3858-3940 (6)	nsp7 [polyprotein=ORF1ab polyprotein] [organism=Severe acute respiratory syndrome coronavirus 2] [isolate=SARS-CoV-2/human/USA/JFRR/2020]	SKMPDVKCTSVVLLSVLQQLRVESSSKLWAQCVQLHNDILLAKDTTEAFEKMVSLLSVLLSMQGAVDINKLCEEMLDNRATLQ
UPY61911.1:3829-3911 (6)	nsp7 [polyprotein=ORF1ab polyprotein] [organism=Severe acute respiratory syndrome coronavirus 2] [isolate=SARS-CoV-2/human/USA/TG1203703/2022]	XXXXXXXXXXXXXXSVLQXLRVESSSKLWAQCVQLHNDILLAKDTTEAFEKMVSLLSVLLSMQGAVDINKLCEEMLDNRATLQ
UVC19840.1:3857-3939 (6)	nsp7 [polyprotein=ORF1ab polyprotein] [organism=Severe acute respiratory syndrome coronavirus 2] [isolate=SARS-CoV-2/human/USA/TG1225395/2022]	SKMSDVKCTSVVLLSVLQQLRVESSSKLWAQCVQLHNDILLAKDTTEAFEKMVSLLSVLLSMQGAVDINKLCEEMXXNRATLQ
UXH95744.1:3857-3939 (6)	nsp7 [polyprotein=ORF1a polyprotein] [organism=Severe acute respiratory syndrome coronavirus 2] [isolate=SARS-CoV-2/human/USA/WI-UW-9821/2022]	SKMSDVKCTSVVLLSVLQQLRVEXXXXXXXXXXXXXXXXXXXXXXXXXXXXXXXXXXXXXXXXXXXXXXXXXEEMLDNRATLQ
UJV26205.1:3860-3942 (6)	nsp7 [polyprotein=ORF1ab polyprotein] [organism=Severe acute respiratory syndrome coronavirus 2] [isolate=SARS-CoV-2/human/USA/CA-CDPH-2000003139/2020]	SKMSDVKCTSVVLLSVLQQLRVESSSKLXXQCGQLHNDILLAKDTTEAFEKMVSLLSVLLSMQGVVDINKLCEEMLDNRAILQ
WCL09552.1:3857-3939 (6)	nsp7 [polyprotein=ORF1ab polyprotein] [organism=Severe acute respiratory syndrome coronavirus 2] [isolate=SARS-CoV-2/human/USA/MD-MDH-7310/2022]	XXXXXXXXXSVXXXXXXXXLRVESSSKLWAQCVQLHNDILLAKDTTEAFEKMVSLLSVLLSMQGAVDINKLCEEMLDNRATLQ
WCL12652.1:3850-3932 (6)	nsp7 [polyprotein=ORF1ab polyprotein] [organism=Severe acute respiratory syndrome coronavirus 2] [isolate=SARS-CoV-2/human/USA/MD-MDH-7690/2022]	XXXXXXXXXXXXXXXXXXXXXXXXXXXXXXXXXXXHNDXXXAKDTTEAFEKMVSLLSVLLSMQGAVDINKLCEEMLDNRATLQ
UHY84096.1:3860-3942 (6)	nsp7 [polyprotein=ORF1ab polyprotein] [organism=Severe acute respiratory syndrome coronavirus 2] [isolate=SARS-CoV-2/human/USA/CA-CDPH-3000112554/2021]	SKMSXXKCTXXXXXXXLQQLRVESSSKLWAQCVQLHNDILLAKDTTEAFEKMVSLLSVLLSMQGAVDINKLCEEMLDNRATLQ
URP55611.1:3860-3942 (6)	nsp7 [polyprotein=ORF1ab polyprotein] [organism=Severe acute respiratory syndrome coronavirus 2] [isolate=SARS-CoV-2/human/NZL/21MV1306/2021]	XXXXXXXXXXXXXXXXXXXXXXESSSKLWAQCVQLHNDILLAKDTTEAFEKMVSLLSVLLSMQGAVXXXXXXXXXXXXXXXXX
UHM40754.1:3835-3917 (6)	nsp7 [polyprotein=ORF1ab polyprotein] [organism=Severe acute respiratory syndrome coronavirus 2] [isolate=SARS-CoV-2/human/USA/MI-MDHHS-SC35540/2021]	XXXXXXXXXSVVLLSVLQQLRVESSSKLWAQCVQLHNDILLAKDTTEAFEKMVSLLSVLLSMHGAVDINKLCEEMLDNRATLQ
UIV99405.1:3852-3934 (6)	nsp7 [polyprotein=ORF1ab polyprotein] [organism=Severe acute respiratory syndrome coronavirus 2] [isolate=SARS-CoV-2/human/USA/TX-CDC-ASC210570797/2021]	SKMSDVKCTSVVLLSVLXXLRVESSSKLWAQCVQLHNDILLAKDTTEAFEKMVSLLSVLLSMQGAVDINKLCEEMLDNRATLQ
QWS12419.1:3857-3939 (6)	nsp7 [polyprotein=ORF1ab polyprotein] [organism=Severe acute respiratory syndrome coronavirus 2] [isolate=SARS-CoV-2/human/USA/CA-CDC-QDX25164392/2021]	XXXXXXXXXXXXXXXXLQQLRVESSSKLWAQCVQLHNDILLAKDTTEAFEKMVSLLSVLLSMQGAVDINKLCEEMLNNRATLQ
QVE09280.1:3860-3942 (6)	nsp7 [polyprotein=ORF1ab polyprotein] [organism=Severe acute respiratory syndrome coronavirus 2] [isolate=SARS-CoV-2/human/USA/VA-DCLS-4881/2021]	SKMSDVKXXXXVLLSVLQQLRVESSSKLWAQCVQLHNDILLAKDTTEAFEKMVSLLSVLLSMQGAVDINKLCEEMLDNRATLQ
UYL58477.1:3857-3939 (6)	nsp7 [polyprotein=ORF1ab polyprotein] [organism=Severe acute respiratory syndrome coronavirus 2] [isolate=SARS-CoV-2/human/USA/WA-CDC-UW22100546308/2022]	SKMSDVKCTSVVLLSVLQQLRVESSSKLWAQCVQLHNEILLAKDTTEAFEKMVSLLXXXXXXXXXXXXXXXXXXXXXXXXXXX
UPP17644.1:3857-3939 (6)	nsp7 [polyprotein=ORF1ab polyprotein] [organism=Severe acute respiratory syndrome coronavirus 2] [isolate=SARS-CoV-2/human/USA/OR-CDC-LC0582255/2022]	SKMSDVKCTSVVLLSVLQQFRVESSSKLWSQCVQLHNDILLAKDTTEAFEKMVSLLSVLLSMQGAVDINKLCEEMLDNRATLQ
UJT52243.1:3856-3938 (6)	nsp7 [polyprotein=ORF1ab polyprotein] [organism=Severe acute respiratory syndrome coronavirus 2] [isolate=SARS-CoV-2/human/USA/JQSC/2022]	SKMSDVKCTSVVLLSVLQQLRVESSSXXXXXXXXXXXXXXXXXXXXXXXXXXXXXXXXXXXXXXXXXXNKLCEEMLDNRATLQ
UDK01186.1:3860-3942 (6)	nsp7 [polyprotein=ORF1ab polyprotein] [organism=Severe acute respiratory syndrome coronavirus 2] [isolate=SARS-CoV-2/human/USA/TN-CDC-ASC210093253/2021]	SKMSDVKCTSVVLLSVLQQLRVESSSKLWAQCVQLHNDILLAKDXTEAFEKMVSLLSVLLSMQGAVDINKLCEEMLDNRATLX
ULB72662.1:3830-3912 (6)	nsp7 [polyprotein=ORF1ab polyprotein] [organism=Severe acute respiratory syndrome coronavirus 2] [isolate=SARS-CoV-2/human/USA/PAHP149551/2022]	SKMSDVKCTSVVLLSVLQQLRVESSSKLXXXXXXXXXXXXXXXXTTEAFEKMVSLLSVLLSMQGAVDINKLCEEMLDNRATLQ
UQR24970.1:3841-3923 (6)	nsp7 [polyprotein=ORF1ab polyprotein] [organism=Severe acute respiratory syndrome coronavirus 2] [isolate=SARS-CoV-2/human/USA/TG1162957/2021]	SKMSDVKCTSVVLLSVLQQLRVESSSKLWAXXVQLHNDILLAKDTTEAFEKMVSLLSVLLSMQGAVDINKLCEEMLDNRATLQ
WCL14630.1:3857-3939 (6)	nsp7 [polyprotein=ORF1ab polyprotein] [organism=Severe acute respiratory syndrome coronavirus 2] [isolate=SARS-CoV-2/human/USA/MD-MDH-8070/2022]	XXXXXXXXXSXXXXXXXXXLRVESSSKLWAQCVQLHNDILLAKDTTEAFEKMVSLLSVLLSMQGAVDINKLCEEMLDNRATLQ
UEE26402.1:3860-3942 (6)	nsp7 [polyprotein=ORF1a polyprotein] [organism=Severe acute respiratory syndrome coronavirus 2] [isolate=SARS-CoV-2/human/USA/AZ-ASU17648/2021]	SKMSDVKCTSVVLLSVLQQLRVESSSKLWAQCVQLHNDILLAKDTTEAFEKMVSLLSXXXXXXXXXXXXXXXXXXXXXXXXXX
UPE91964.1:3847-3929 (6)	nsp7 [polyprotein=ORF1ab polyprotein] [organism=Severe acute respiratory syndrome coronavirus 2] [isolate=SARS-CoV-2/human/FRA/IHUCOVID-002668/2020]	SKMSDVKCTSVVLLXXXXXXXXXXXSKLWAQCVQLHNDILLAKDTTEAFEKMVSLLSVLLSMQGAVDINKLCEEMLDNRATLQ
QRN76566.1:3860-3942 (6)	nsp7 [polyprotein=ORF1ab polyprotein] [organism=Severe acute respiratory syndrome coronavirus 2] [isolate=SARS-CoV-2/human/USA/TX-DSHS-2377/2021]	XXXXXXXXXSVVLLSVLQQLRVESSSKLWAQCCQLHNDILLAKDTTEAFEKMVSLLSVLLSMQGAVDINKLCEEMLDNRAILQ
WEY15775.1:3830-3912 (6)	nsp7 [polyprotein=ORF1ab polyprotein] [organism=Severe acute respiratory syndrome coronavirus 2] [isolate=SARS-CoV-2/human/USA/WA-PHL-019228/2022]	XXXXXXXXXSXXXXXXXXXXXXXXXXXXXXXXXXXXXXXXXAKDTTEAFEKMVSLLSVLLSMQGAVDINKLCEEMLDNRATLQ
UQG74038.1:3857-3939 (6)	nsp7 [polyprotein=ORF1ab polyprotein] [organism=Severe acute respiratory syndrome coronavirus 2] [isolate=SARS-CoV-2/human/USA/TG881469/2021]	SKMSDVKCTSVVLLSVLQQLRVESSSXXWAQCVQLHNDILLAKDTTEAFEKMVSLLSVLLSMQGAVDINKLCEEMLDNRATLQ
UST51372.1:3857-3939 (6)	nsp7 [polyprotein=ORF1ab polyprotein] [organism=Severe acute respiratory syndrome coronavirus 2] [isolate=SARS-CoV-2/human/USA/TG1346312/2022]	XXXXDXXCTSVVLLSVLQQLRVESSSKLWAQCVQLHNDILLAKDTTEAFEKMVSLLSVLLSMQGAVDINKLCEEMLDNRATLQ
UIB22447.1:3857-3939 (6)	nsp7 [polyprotein=ORF1a polyprotein] [organism=Severe acute respiratory syndrome coronavirus 2] [isolate=SARS-CoV-2/human/USA/TN-CDC-ASC210632217/2021]	SKMSDVKCTSXXLLSVLQQLRVESSSKLXXQCVQLHNDILLAKDTTEAFEKMVSLLSVLLSMQGAVDINKLCEEMLDNRATLQ
UQH50991.1:3847-3929 (6)	nsp7 [polyprotein=ORF1ab polyprotein] [organism=Severe acute respiratory syndrome coronavirus 2] [isolate=SARS-CoV-2/human/USA/TG1228591/2021]	XXXXXXXXXXXXXXXXXXXXXXXXXXXXXXXXXXXXXXXXXAXDTTEAFEKMVSLLSVLLSMQGAVDINKLCEEMLDNRATLQ
QSY40132.1:3834-3916 (6)	nsp7 [polyprotein=ORF1ab polyprotein] [organism=Severe acute respiratory syndrome coronavirus 2] [isolate=SARS-CoV-2/human/USA/UT-UPHL-2103278128/2021]	XXXXXXXXXXXXXXXXLQQLRVESSSKLWAQCVQLHNDILLAKDTTEAFEKMVSLLSVLLSMQGAVDINKLCEEILDNRATLQ
WBK57702.1:3854-3936 (6)	nsp7 [polyprotein=ORF1ab polyprotein] [organism=Severe acute respiratory syndrome coronavirus 2] [isolate=SARS-CoV-2/human/USA/WI-UW-12173/2022]	SKMSDVKCTSVVLLSVLQQLRVESXXXXXXXXXXXXXXXXXXXXXXXXXXXXXXXXXXXXXXXXXXXXXXXXEEMLDNRATLQ
QZX66805.1:3860-3942 (6)	nsp7 [polyprotein=ORF1ab polyprotein] [organism=Severe acute respiratory syndrome coronavirus 2] [isolate=SARS-CoV-2/human/USA/NMDOH-2021147795/2021]	XXXXXXXXXXXXXXXXXXXXXXXXXXXXXXXXXXXXXXXXXXXXXXXXXXXXXXXXXXXXXXQGAVDINKLCEEMLDNRATLQ
UXL81991.1:3860-3942 (6)	nsp7 [polyprotein=ORF1a polyprotein] [organism=Severe acute respiratory syndrome coronavirus 2] [isolate=SARS-CoV-2/human/BEN/507682/2021]	XXXXXXXXXXXXXXXXXXXXXXXXXXXXXXXXXXXXXXXLLAKDTTEAXXXXXXXXXXXXXXXXXXXXXXXXXXXXXXXXXXX
UZG85383.1:3833-3915 (6)	nsp7 [polyprotein=ORF1ab polyprotein] [organism=Severe acute respiratory syndrome coronavirus 2] [isolate=SARS-CoV-2/human/USA/FL-BPHL-14297/2022]	XXXXXXXXXXXXXXXXXXXXXXXXXXXXXXXXXXXXXXXXXAKDTTEAFEKMVSLLSVLLSMQGAVDINKFCEEMLDNRATLQ
USG29445.1:3830-3912 (6)	nsp7 [polyprotein=ORF1ab polyprotein] [organism=Severe acute respiratory syndrome coronavirus 2] [isolate=SARS-CoV-2/human/USA/CA-CDPH-500059018/2022]	SKMSDVKCTXXXXXXXXXXXXXXXXXXXXXXXXXXXXXXXXAKDTTEAFEKMVSLLSVLLSMQGAVDINKLCEEMLDNRATLQ
UGN67465.1:3860-3942 (6)	nsp7 [polyprotein=ORF1ab polyprotein] [organism=Severe acute respiratory syndrome coronavirus 2] [isolate=SARS-CoV-2/human/USA/MI-MDHHS-SC32530/2021]	SKMSDVKCTSVVLXXXXQQLRVESSSKLWAQCVQLHNDILLAKDTTEAFEKMVSLLSVLLSMQGAVDINKLCEEMLDNRATLQ
QSN95624.1:3860-3942 (6)	nsp7 [polyprotein=ORF1ab polyprotein] [organism=Severe acute respiratory syndrome coronavirus 2] [isolate=SARS-CoV-2/human/USA/NY-CDC-LC0016462/2021]	SKMSDVKCTSVVLLSVLQQLRVESSSKLWAQCVQLHNDILLAKDTTEAFEKMVSILSVLLSMQGAVDINKLCEEMLDNRATLQ
ULP19574.1:3856-3938 (6)	nsp7 [polyprotein=ORF1ab polyprotein] [organism=Severe acute respiratory syndrome coronavirus 2] [isolate=SARS-CoV-2/human/USA/CA-CDC-FG-274448/2022]	SKMSDVKCTSVVLLSVLQQLRVESSSKLWAQCVQLHTDILLAKDTTEAFEKMVSLLSVLLSMQGAVDINKLCEEMLDNRATLQ
UEN01229.1:3860-3942 (6)	nsp7 [polyprotein=ORF1ab polyprotein] [organism=Severe acute respiratory syndrome coronavirus 2] [isolate=SARS-CoV-2/human/USA/IL-CDC-ASC210362272/2021]	SKMSDVKCTSVVLLSVLQQLRVESSSKLWAQCVQLHNDILXXXXXXEAFEKMVSLLSVLLSMQGAVDINKLCEEMLDNRATLX
WAQ36109.1:3857-3939 (6)	nsp7 [polyprotein=ORF1a polyprotein] [organism=Severe acute respiratory syndrome coronavirus 2] [isolate=SARS-CoV-2/human/NGA/CV1270/2021]	SKMSDVKCTSVVLLSVLQQLRVESSSKLWAQCVQLHNDILLAKDTTEAFEKMVSLLSVLLSMQGAVDINKLCEEXXXXXXXXX
QTQ52098.1:3860-3942 (6)	nsp7 [polyprotein=ORF1ab polyprotein] [organism=Severe acute respiratory syndrome coronavirus 2] [isolate=SARS-CoV-2/human/USA/FL-BPHL-1969/2021]	SKMSDVKCTSVVLLSVLQQLRVESSSKLWAQCVQLHNDILLAKDTTEAFEEMVSLLSVLLSMQGAVDINKLCEEMLDNRATLQ
UBQ76785.1:3860-3942 (6)	nsp7 [polyprotein=ORF1a polyprotein] [organism=Severe acute respiratory syndrome coronavirus 2] [isolate=SARS-CoV-2/human/USA/FL-CDC-ASC210240117/2021]	SKMXXVKCTSVVLLSVLQQLRVESSSKLWAQCVQLHNDILLAKDTTEAFEKMVSLLSVLLSMQGAVDINKLCEEMLDNRATLQ
URG80651.1:3856-3938 (6)	nsp7 [polyprotein=ORF1ab polyprotein] [organism=Severe acute respiratory syndrome coronavirus 2] [isolate=SARS-CoV-2/human/USA/CA-CDPH-6000010176/2022]	SKMSGVKCTSVVLLSVLQQLRVESSSKLWAQCVQLHNDILLAKDTTEAFEKMVSLLSVLLSMQGAVDINKLCEEMLDNRATLQ
UXK38910.1:3830-3912 (6)	nsp7 [polyprotein=ORF1a polyprotein] [organism=Severe acute respiratory syndrome coronavirus 2] [isolate=SARS-CoV-2/human/USA/CO-CDPHE-2103608009/2022]	XXXXXXXXXXXXXXXXXXXXXXXXXXXXXXXXXXXXXXXXXAKDTTEAFEKMVSLLSVLFSMQGAVDINKLCEEMLDNRATLQ
UXH95934.1:3856-3938 (6)	nsp7 [polyprotein=ORF1ab polyprotein] [organism=Severe acute respiratory syndrome coronavirus 2] [isolate=SARS-CoV-2/human/USA/WI-UW-9838/2022]	SKMSDVKCTSVVLLSVLQQLRXXXXXXXXXXXXXXXXXXXXXXXXXXXXXXXXXXXXXXXXXXXXXXXXXXXEEMLDNRATLQ
UZN21477.1:3836-3918 (6)	nsp7 [polyprotein=ORF1ab polyprotein] [organism=Severe acute respiratory syndrome coronavirus 2] [isolate=SARS-CoV-2/human/USA/E414299063I/2022]	SKMSDVKCTSVVLLSVLQQLRXXXXXXXXXXXXQLHNDILLAKDTTEAFEKMVSLLSVLLSMQGAVDINKLCEEMLDNRATLQ
UKH83957.1:3856-3938 (6)	nsp7 [polyprotein=ORF1ab polyprotein] [organism=Severe acute respiratory syndrome coronavirus 2] [isolate=SARS-CoV-2/human/USA/IN-CDC-STM-BEF9MV65K/2022]	SKMSDVKCTSVVLLSVLQQLRVGSSSKLWAQCVQLHNDILLAKDTTEAFEKMVSLLSVLLSMQGAVDINKLCEEMLDNRATLQ
UQH54017.1:3857-3939 (6)	nsp7 [polyprotein=ORF1ab polyprotein] [organism=Severe acute respiratory syndrome coronavirus 2] [isolate=SARS-CoV-2/human/USA/TG1258916/2022]	XXXXXXXXXXXXXXXXXXXXXXXXXXXXXAQXVQLHNDILLAKDTTEAFEKMVSLLSVLLSMQGAVDINKLCEEMLDNRATLQ
UPD85336.1:3860-3942 (6)	nsp7 [polyprotein=ORF1ab polyprotein] [organism=Severe acute respiratory syndrome coronavirus 2] [isolate=SARS-CoV-2/human/FRA/IHUCOVID-030414_Nova1/2021]	XXXXXXXXXXXXXXXXLQQLRVESSSKLWAQCVQLHNDILLAKDTTEAFXKMVSLLSVLLSMQGAVDINKLCEEMLDNRATLQ
WCB19331.1:3860-3942 (6)	nsp7 [polyprotein=ORF1ab polyprotein] [organism=Severe acute respiratory syndrome coronavirus 2] [isolate=SARS-CoV-2/human/USA/MT-UMGC-05092/2020]	XKXXXXKCTSVVLLSVLQQLRVESSSKLWAQCVQLHNDILLAKDTTEAFEKMVSLLSVLLSMQGAVDINKLCEEMLDNRATLQ
UQH42430.1:3856-3938 (6)	nsp7 [polyprotein=ORF1ab polyprotein] [organism=Severe acute respiratory syndrome coronavirus 2] [isolate=SARS-CoV-2/human/USA/TG1219964/2022]	SKMSDVKCTSVVLLXXXXXXXXXXXXXXXXXXXQLHNDILLAKDTTEAFEKMVSLLSVLLSMQGAVDINKLCEEMLDNRATLQ
UQH51452.1:3857-3939 (6)	nsp7 [polyprotein=ORF1ab polyprotein] [organism=Severe acute respiratory syndrome coronavirus 2] [isolate=SARS-CoV-2/human/USA/TG1228521/2021]	XXXXXXXXXXXXXXXXXXXXXXXXXXXXXXXXXXXXXXXXXXXXXXXXXXXXXXXXSVLLSMQGAVDINKLCEEMLDNRATLQ
UPB03387.1:3859-3941 (6)	nsp7 [polyprotein=ORF1a polyprotein] [organism=Severe acute respiratory syndrome coronavirus 2] [isolate=SARS-CoV-2/human/FRA/IHUCOVID-066030_Nova1/2022]	SKXXXXXXXXXXXXXXXXXXXXXXXXXXXXXXXXXXXXXXXAKDTTEAFEKMVSLLSVLLSMQGAVDINKLCEEMLDNRATLQ
UGW55454.1:3860-3942 (6)	nsp7 [polyprotein=ORF1ab polyprotein] [organism=Severe acute respiratory syndrome coronavirus 2] [isolate=SARS-CoV-2/human/USA/CA-CDPH-2000003134/2020]	SKMSDVKCTSVVLLSVLQQLRVESSSKLWAQCGQLHNDILLAKDTTEAFEKMVSLLSVLLSMQGVVDINKLCEEMLDNRAILQ
UVU84908.1:3857-3939 (6)	nsp7 [polyprotein=ORF1ab polyprotein] [organism=Severe acute respiratory syndrome coronavirus 2] [isolate=SARS-CoV-2/human/USA/CT-CDC-LC0845042/2022]	SKMSDVKCTSVVLLSVLQQLRVESSSKLWAQCVQLHNDILIAKDTTEAFEKMVSLLSVLLSMQGAVDINKLCEEMLDNRATLQ
UYL41911.1:3860-3942 (6)	nsp7 [polyprotein=ORF1ab polyprotein] [organism=Severe acute respiratory syndrome coronavirus 2] [isolate=SARS-CoV-2/human/USA/DE-DHSS-B1157181/2021]	SKXXXXXXXXXXXXXXXXXXXXXXXXXXXXXXXXXXXXXXXXXXXXXXXXXXXXXXXXXXXXXXXXXXXXXXXXXXXXXXXXX
UDQ29072.1:3857-3939 (6)	nsp7 [polyprotein=ORF1ab polyprotein] [organism=Severe acute respiratory syndrome coronavirus 2] [isolate=SARS-CoV-2/human/USA/MA-MASPHL-06124/2021]	SKMSDVKCTSVVLLSVLQQLRXXXXXXXXXXXXXLHNDILLAKDTTEAFEKMVSLLSVLLSMQGAVDINKLCEEMLDNRATLQ
UAU21719.1:3859-3941 (6)	nsp7 [polyprotein=ORF1ab polyprotein] [organism=Severe acute respiratory syndrome coronavirus 2] [isolate=SARS-CoV-2/human/USA/CA-CDC-FG-069606/2021]	SKMSDVKCTSVVLLSVLQQLRVESSSKLWAQCVQLHNDILLAKDTTEAFEKMVSLLSVLLSMQGAVDINKFCEEILDNRATLQ
QWS80582.1:3860-3942 (6)	nsp7 [polyprotein=ORF1ab polyprotein] [organism=Severe acute respiratory syndrome coronavirus 2] [isolate=SARS-CoV-2/human/USA/UND-00085749/2021]	XKMSDXXXXSVVLLSVLQQLRVESSSKLWAQCVQLHNDILLAKDTTEAFEKMVSLLSVLLSMQGAVDINKLCEEMLDNRATLQ
UPH88269.1:3857-3939 (6)	nsp7 [polyprotein=ORF1ab polyprotein] [organism=Severe acute respiratory syndrome coronavirus 2] [isolate=SARS-CoV-2/human/FRA/IHUCOVID-071496-N1M/2022]	XXXXXXXXXXXXXXXXXXXXXXXXXXXXXXXXXXXXXXXXXAKDTTEAFEKMVSLFSVLLSMQGAVDINKLCEEMLDNRATLQ
QYC28497.1:3857-3939 (6)	nsp7 [polyprotein=ORF1ab polyprotein] [organism=Severe acute respiratory syndrome coronavirus 2] [isolate=SARS-CoV-2/human/USA/UT-UPHL-210721739224/2021]	XXXXXXXXXXXXXXXXLQQLRVESSSKLWAQCVQLHNDILLAKDTTEAFEKMVSLLSVLLSMRGAVDINKLCEEMLDNRATLQ
UPY62208.1:3857-3939 (6)	nsp7 [polyprotein=ORF1ab polyprotein] [organism=Severe acute respiratory syndrome coronavirus 2] [isolate=SARS-CoV-2/human/USA/TG1193602/2021]	XKMSDXKCTSVVLLSVLQQLRVESSSKLWAQCVQLHNDILLAKDTTEAFEKMVSLLSVLLSMQGAVDINKLCEEMLDNRATLQ
UDI39520.1:3860-3942 (6)	nsp7 [polyprotein=ORF1ab polyprotein] [organism=Severe acute respiratory syndrome coronavirus 2] [isolate=SARS-CoV-2/human/USA/TX-CDC-ASC210332120/2021]	SKMSDVKCTSVVLLSVLQQLRVESSSKLWAQCVQIHNDILLAKDTTEAFEKMVSLLSVLLSMQGAVDINKLCEEMLDNRATLQ
UFC72413.1:3860-3942 (6)	nsp7 [polyprotein=ORF1ab polyprotein] [organism=Severe acute respiratory syndrome coronavirus 2] [isolate=SARS-CoV-2/human/USA/FL-CDC-ASC210467881/2021]	XKMSDXXCTSVVLLSVLQQLRVESSSKLWAQCVQLHNDILLAKDTTEAFEKMVSLLSVLLSMQGAVDINKLCEEMLDNRATLQ
UNR42262.1:3856-3938 (6)	nsp7 [polyprotein=ORF1a polyprotein] [organism=Severe acute respiratory syndrome coronavirus 2] [isolate=SARS-CoV-2/human/USA/VT-Broad-CRSP_V6FNUDVQMTHDVOWU/2022]	PKMSDVKCTSVVLLSVLQQLRVESSSKLWAQCVQLHNDILLAKDTTEAFEKMVSLLSVLLSMQGAVDINKLCEEMLDNRATLQ
UPE93217.1:3860-3942 (6)	nsp7 [polyprotein=ORF1ab polyprotein] [organism=Severe acute respiratory syndrome coronavirus 2] [isolate=SARS-CoV-2/human/FRA/IHUCOVID-002792/2020]	SKXXXXXXXXXXXXXXXXXXXXXXXXXXXXXXVQLHNDILLAKDTTEAFEKMVSLLSVLLSMQGAVDINKLCEEMLDNRATLQ
UOU21750.1:3833-3915 (6)	nsp7 [polyprotein=ORF1ab polyprotein] [organism=Severe acute respiratory syndrome coronavirus 2] [isolate=SARS-CoV-2/human/USA/FL-BPHL-5061/2022]	SKMSDVKCTSVVXXXXXXXXXXXXXXXXXXXXVQLHNDILLAKDTTEAFEKMVSLLSVLLSMQGAVDINKLCEEMLDNRATLQ
UPD06961.1:3857-3939 (6)	nsp7 [polyprotein=ORF1ab polyprotein] [organism=Severe acute respiratory syndrome coronavirus 2] [isolate=SARS-CoV-2/human/FRA/IHUCOVID-009823_Illu1/2021]	SKMSDVKCTSVVLLSVLQQLRVESSSKLWAQCVQLHNDILLTKDTTEAFEKMVSLLSVLFSMQGAVDINKLCEEMLDNRATLQ
QKK14390.1:3860-3942 (6)	nsp7 [polyprotein=ORF1ab polyprotein] [organism=Severe acute respiratory syndrome coronavirus 2] [isolate=SARS-CoV-2/human/USA/FL-BPHL-0100/2020]	SKMSDVNCTSVVLLSVLQQLRVESSSKLWAQCVQLHNDILLAKDTTEAFEKMVSLLSVLLSMQGAVDINKLCEEMLDNRATLQ
UFM30691.1:3860-3942 (6)	nsp7 [polyprotein=ORF1a polyprotein] [organism=Severe acute respiratory syndrome coronavirus 2] [isolate=SARS-CoV-2/human/USA/GA-CDC-ASC210522617/2021]	SKMSDVKCTSVVLLSVLQQLRVESSXXLWAQCVQLHNDILLAKDTTEAFEKMVSLLSVLLSMQGAVDINKLCEEMLDNRATLQ
UZT73241.1:3857-3939 (6)	nsp7 [polyprotein=ORF1ab polyprotein] [organism=Severe acute respiratory syndrome coronavirus 2] [isolate=SARS-CoV-2/human/USA/CA-LACPHL-AF16125/2022]	SKMSDVKCTSVVLLSVLQQLRVESSSKLWAQCVQLHNDILLAKDTTEXXXXXXXXXXXXXXXXXXXXXXXXXEEMLDNRATLQ
QUR38468.1:3857-3939 (6)	nsp7 [polyprotein=ORF1ab polyprotein] [organism=Severe acute respiratory syndrome coronavirus 2] [isolate=SARS-CoV-2/human/USA/WV-CDC-QDX23997631/2021]	SKMSDVKCTSVVLLSVLQLLRVESSSKLWAQCVQLHNDILLAKDTTEAFEKMVSLLSVLLSMQGAVDINKLCEEMLDNRATLQ
UFJ67320.1:3860-3942 (6)	nsp7 [polyprotein=ORF1ab polyprotein] [organism=Severe acute respiratory syndrome coronavirus 2] [isolate=SARS-CoV-2/human/USA/CA-CDC-FG-170795/2021]	SKMSDVKCTSVVLLSVLQQLRVESSSKLWAQCVQLHNDILLAKDTTEAFEKMVSLJSVLLSMQGAVDINKLCEEMLDNRATLQ
UAQ52743.1:3859-3941 (6)	nsp7 [polyprotein=ORF1ab polyprotein] [organism=Severe acute respiratory syndrome coronavirus 2] [isolate=SARS-CoV-2/human/USA/FL-CDC-LC0123034/2021]	SKMSDVKCTSVVLLSVLQQLRVESSSKLWAQCVQLHNDILLANDTTEAFEKMVSLLSVLLSMQGAVDINKLCEEMLDNRATLQ
UQH51606.1:3860-3942 (6)	nsp7 [polyprotein=ORF1ab polyprotein] [organism=Severe acute respiratory syndrome coronavirus 2] [isolate=SARS-CoV-2/human/USA/TG1249418/2021]	XXXXXXXXXXXXXXXXXXXLXVESSSKLWAQCVQLHNDILLAKDTTEAFEKMVSLLSVLLSMQGAVDINKLCEEMLDNRATLQ
QXP15531.1:3860-3942 (6)	nsp7 [polyprotein=ORF1ab polyprotein] [organism=Severe acute respiratory syndrome coronavirus 2] [isolate=SARS-CoV-2/human/USA/IL-19191167/2021]	SKMSDVKCTSVVLLSVLQQLRVESSSKLWAQCVQLHNDILFAKDTTEAFEKMVSLLSVLLSMQGAVDINKLCEEMLDNRATLQ
UHM28800.1:3860-3942 (6)	nsp7 [polyprotein=ORF1a polyprotein] [organism=Severe acute respiratory syndrome coronavirus 2] [isolate=SARS-CoV-2/human/USA/MI-MDHHS-SC26703/2021]	SKMXXXXXXXXVLLSVLQQLRVESSSKLWAQCVQLHNDILLAKDTTEAFEKMVSLLSVLLSMQGAVDINKLCEEMLDNRATLQ
WBU96019.1:3857-3939 (6)	nsp7 [polyprotein=ORF1ab polyprotein] [organism=Severe acute respiratory syndrome coronavirus 2] [isolate=SARS-CoV-2/human/USA/22-001910-WGS-02/2022]	SKMSDVKCTSVVLLSVLQQLRVESSSKLWAQCVQLHNDILLAKDTTEAFEKMVSLLXXXXXXXGAVDINKLCEEMLDNRATLQ
UJV19296.1:3860-3942 (6)	nsp7 [polyprotein=ORF1a polyprotein] [organism=Severe acute respiratory syndrome coronavirus 2] [isolate=SARS-CoV-2/human/USA/CA-CDPH-3000051744/2021]	SXXXXVKCTSVVLLSVLQQLRVESSSKLWAQCVQLHNDILLAKDTTEAFEKMVSLLSVLLSMQGAVDINKLCEEMLDNRATLQ
QVV12127.1:3860-3942 (6)	nsp7 [polyprotein=ORF1ab polyprotein] [organism=Severe acute respiratory syndrome coronavirus 2] [isolate=SARS-CoV-2/human/USA/CO-CDC-ASC210029082/2021]	SKMSDVKCTSVVLLSVLQQLRVESSSKLWAQCVQLHNDILLAKDTTEAFEKMVSLLSVLLSMQGAVDINKLCEEMLDNSATLQ
UHA11426.1:3860-3942 (6)	nsp7 [polyprotein=ORF1ab polyprotein] [organism=Severe acute respiratory syndrome coronavirus 2] [isolate=SARS-CoV-2/human/USA/IL-CDC-ASC210402462/2021]	SKMSDVKCTSVVLLSVLQQLRVESSSKLWAQCVQLHNDILLXXXTTEAFEKMVSLLSVLLSMQGAVDINKLCEEMLDNRATLQ
UHM38917.1:3860-3942 (6)	nsp7 [polyprotein=ORF1ab polyprotein] [organism=Severe acute respiratory syndrome coronavirus 2] [isolate=SARS-CoV-2/human/USA/MI-MDHHS-SC35070/2021]	XXXXXXXXXSVVLLSVLQQLRVESSSKLWVQCVQLHNDILLAKDTTEAFEKMVSLLSVLLSMQGAVDINKLCEEMLDNRATLQ
UFY80603.1:3860-3942 (6)	nsp7 [polyprotein=ORF1ab polyprotein] [organism=Severe acute respiratory syndrome coronavirus 2] [isolate=SARS-CoV-2/human/USA/KY-CDC-ASC210485426/2021]	SKMSDVKCTSVVLLSVLQQLRVESSSKLWAQCVQLHNDILLAKDTTEAFEKMVSLLSVLLSMQGAVDRNKLCEEMLDNRATLQ
UOH28732.1:3838-3920 (6)	nsp7 [polyprotein=ORF1ab polyprotein] [organism=Severe acute respiratory syndrome coronavirus 2] [isolate=SARS-CoV-2/human/USA/SD-INBRE-02146/2020]	SKMSDVKCTSVVLLSVLQQLRVESSSKXXXXXXXXHNDILLAKDTTEAFEKMVSLLSVLLSMQGAVDINKLCEEMLDNRATLQ
WCL06009.1:3849-3931 (6)	nsp7 [polyprotein=ORF1ab polyprotein] [organism=Severe acute respiratory syndrome coronavirus 2] [isolate=SARS-CoV-2/human/USA/MD-MDH-6877/2022]	XXXXXXXCTSVVXLSVLQQLRVESSSKLWAQCVQLHNDILLAKDTTEAFEKMVSLLSVLLSMQGAVDINKLCEEMLDNRATLQ
WCL06620.1:3857-3939 (6)	nsp7 [polyprotein=ORF1ab polyprotein] [organism=Severe acute respiratory syndrome coronavirus 2] [isolate=SARS-CoV-2/human/USA/MD-MDH-6999/2022]	XXXXXXXXXXXXXXXXXXXXXVXSSSKLWAQCVQLHNDILLAKDTTEAFEKMVSLLSVLLSMQGAVDINKLCEEMLDNRATLQ
WBB40892.1:3857-3939 (6)	nsp7 [polyprotein=ORF1ab polyprotein] [organism=Severe acute respiratory syndrome coronavirus 2] [isolate=SARS-CoV-2/human/USA/FL-BPHL-15763/2022]	SKMSDVKCTSVVLLSVLQQLRXXXXXXXXXXXXXXXXXXXXAKDTTEAFEKMVSLLSVLLSMQGAVDINKLCEEMLDNRATLQ
WBE73950.1:3857-3939 (6)	nsp7 [polyprotein=ORF1ab polyprotein] [organism=Severe acute respiratory syndrome coronavirus 2] [isolate=SARS-CoV-2/human/USA/CA-CDPH-FS25389490/2022]	SKMSDVKCTSVVLLSVLQQLRIESSSKLWAQCVQLHNDILLAKDTTEAFEKMVSLLSVLLSMQGAVDINKLCEEMLDNRVTLQ
UCB93658.1:3860-3942 (6)	nsp7 [polyprotein=ORF1a polyprotein] [organism=Severe acute respiratory syndrome coronavirus 2] [isolate=SARS-CoV-2/human/USA/TX-CDC-ASC210175888/2021]	SKMSDVKCTSVVLLSVLQQLRVESSSKLWAQCVQLHNDILLAKDTTEAFEKMVSLLSVLLSMQGAVDINKLCEEMLDXXXXLQ
UGW53731.1:3860-3942 (6)	nsp7 [polyprotein=ORF1ab polyprotein] [organism=Severe acute respiratory syndrome coronavirus 2] [isolate=SARS-CoV-2/human/USA/CA-CDPH-2000000335/2020]	SKMSDVKCTSVVLLXXLQQLRVESSSKLXXXXXQLHNDILLAKDTTEAFEKMVSLLSVLLSMQGVVDINKLCEEMLDNRAILQ
WDA01443.1:3857-3939 (6)	nsp7 [polyprotein=ORF1ab polyprotein] [organism=Severe acute respiratory syndrome coronavirus 2] [isolate=SARS-CoV-2/human/USA/NJ-CDC-LC1005983/2023]	SKMSDVKCTSVVLLSVLQQLRVESSSKLWAQCVQLHNDILLAKDTTEAFEKMVSLLSVLJSMQGAVDINKLCEEMLDNRATLQ
UJR88228.1:3853-3935 (6)	nsp7 [polyprotein=ORF1ab polyprotein] [organism=Severe acute respiratory syndrome coronavirus 2] [isolate=SARS-CoV-2/human/USA/TX-DSHS-14064/2022]	SKMSDVKCTSVVLLSVLQQLRVESSSKLWAQCVQXXXXXXXXXXXXXXXXXXXXXXXXXXXXQGAVDINKLCEEMLDNRATLQ
QNL12972.1:3860-3942 (6)	nsp7 [polyprotein=ORF1ab polyprotein] [organism=Severe acute respiratory syndrome coronavirus 2] [isolate=SARS-CoV-2/human/USA/WI-UW-1166/2020]	SKMSDVKCTSVVLLLVLQQLRVESSSKLXXXXXXXXXXXXXXXXXXXXXXXXXXXXXXXXXXXXXXXXXXXXXXXXXXXXXXX
UQC64170.1:3811-3893 (6)	nsp7 [polyprotein=ORF1ab polyprotein] [organism=Severe acute respiratory syndrome coronavirus 2] [isolate=SARS-CoV-2/human/FRA/IHUCOVID-003338-1/2021]	SKMSDVKCTSVXXXXXXXXXXXXXXXXXXXXXXXXXXXXXXXXXXXXXXXXXXXXXXXXXXXXXXXXXXXXXXXXXXXXXXXX
UVV29549.1:3857-3939 (6)	nsp7 [polyprotein=ORF1ab polyprotein] [organism=Severe acute respiratory syndrome coronavirus 2] [isolate=SARS-CoV-2/human/USA/SC-CDC-QDX40313012/2022]	SKMSDVKCTSVVLLSVLQQLRVESSSKLWAQCVQLHNDILLAKDTTEAFEKMVSLLTVLLSMQGAVDINKLCEEMLDNRATLQ
UGN94561.1:3860-3942 (6)	nsp7 [polyprotein=ORF1ab polyprotein] [organism=Severe acute respiratory syndrome coronavirus 2] [isolate=SARS-CoV-2/human/USA/MI-MDHHS-SC30230/2021]	SXXXXXXXTSVVLLSVLQQLRVESSSKLWAQCVQLHNDILLAKDTTEAFEKMVSLLSVLLSMQGAVDINKLCEEMLDNRATLQ
QQL89030.1:3860-3942 (6)	nsp7 [polyprotein=ORF1ab polyprotein] [organism=Severe acute respiratory syndrome coronavirus 2] [isolate=SARS-CoV-2/human/USA/UT-UPHL-2012020835/2020]	SKMSDVKCTSVVLLSVLQQLRVESSSKLWAQCVXXXXXXXXXXXXXXXXXXXXXXXXXXXXXXXXXXXXXXXXXXXXXXXTLQ
UEL96475.1:3860-3942 (6)	nsp7 [polyprotein=ORF1ab polyprotein] [organism=Severe acute respiratory syndrome coronavirus 2] [isolate=SARS-CoV-2/human/USA/MN-CDC-IBX506274154104/2021]	XXMSXXXXXSVVLLSVLQQLRVESSSKLWAQCVQLHNDILLAKDTTEAFEKMVSLLSVLLSMQGAVDINKLCEEMLDNRATLQ
UQG78858.1:3860-3942 (6)	nsp7 [polyprotein=ORF1ab polyprotein] [organism=Severe acute respiratory syndrome coronavirus 2] [isolate=SARS-CoV-2/human/USA/TG1061433/2021]	SKMSDVKCTSVXXXXXXXXXXXXXXXXXXXXXXXXXXXXLLAKDTTEAFEKMVSLLSVLLSMQGAVDINKLCEEMLDNRATLQ
WEY15186.1:3825-3907 (6)	nsp7 [polyprotein=ORF1ab polyprotein] [organism=Severe acute respiratory syndrome coronavirus 2] [isolate=SARS-CoV-2/human/USA/WA-PHL-019127/2022]	XXXXXXXXXXXXXXXXXXXXXVXXXXXXXXXXXXXXXXXXXAKDTTEAFEKMVSLLSVLLSMQGAVDINKLCEEMLDNRATLQ
UVC25079.1:3860-3942 (6)	nsp7 [polyprotein=ORF1ab polyprotein] [organism=Severe acute respiratory syndrome coronavirus 2] [isolate=SARS-CoV-2/human/USA/TG1355402/2022]	XXXXXXXXXXXXXXXXXXXXXXXXXXXXXXXXXXXHXDILLAKDTTEAFEKMVSLLSVLLSMQGAVDINKLCEEMLDNRATLQ
UXG45270.1:3857-3939 (6)	nsp7 [polyprotein=ORF1ab polyprotein] [organism=Severe acute respiratory syndrome coronavirus 2] [isolate=SARS-CoV-2/human/USA/LA-PHL-LAPH000308/2022]	SKMSDVKCTSVVLLSVLQQLRVESSSKLWAQCVQLHNDILLAKDTTEAFEKMVSLLSVLFSMQGAVDINKLCEEMXXXXXXXX
WAQ35997.1:3860-3942 (6)	nsp7 [polyprotein=ORF1ab polyprotein] [organism=Severe acute respiratory syndrome coronavirus 2] [isolate=SARS-CoV-2/human/NGA/CV121/2020]	SKMSDVKCTSVVLLSVLQQLRVESSSKLWAQCVQLHNDILLAKDTTEAFEKMVSLLSVLLSMQGAVDINKLFEEMLDNRATLQ
UPA98797.1:3829-3911 (6)	nsp7 [polyprotein=ORF1a polyprotein] [organism=Severe acute respiratory syndrome coronavirus 2] [isolate=SARS-CoV-2/human/FRA/IHUCOVID-065599_Nova1/2022]	XXXXXXXCTSVVLXXXXXXXXXXXXXXXXXXXXXXXXXXXXAKDTTEAFEKMVSLLSVLLSMQGAVDINKLCEEMLDNRATLQ
UES66517.1:3860-3942 (6)	nsp7 [polyprotein=ORF1ab polyprotein] [organism=Severe acute respiratory syndrome coronavirus 2] [isolate=SARS-CoV-2/human/USA/NY-PV26429/2021]	SKMSDVKCTSVVLLSVLQQLRVESSSKLWAQCVQLHNDILLAKDTTEAFEKMVSLLSVLLSMQGAVDINKLCEEMVDNRATLQ
UGN69677.1:3860-3942 (5)	nsp7 [polyprotein=ORF1ab polyprotein] [organism=Severe acute respiratory syndrome coronavirus 2] [isolate=SARS-CoV-2/human/USA/MI-MDHHS-SC32756/2021]	SKMSDXXXXXXXXXXXXXXXXXXXXXXXXXXXXXXXXXXXXXXXXXXXXXXXXXXXXXXXXXXXXXXXXXXXXXXXXXXXXXX
UQH22719.1:3835-3917 (4)	nsp7 [polyprotein=ORF1ab polyprotein] [organism=Severe acute respiratory syndrome coronavirus 2] [isolate=SARS-CoV-2/human/USA/TG1170963/2022]	SKXXXXXXXXXXXXXXXXXXXXXXXXXXXXXXXXLHNDILLAKDTTEAFEKMVSLLSVLLSMQGAVDINKLCEEMLDNRATLQ
WAQ39796.1:3860-3942 (4)	nsp7 [polyprotein=ORF1ab polyprotein] [organism=Severe acute respiratory syndrome coronavirus 2] [isolate=SARS-CoV-2/human/NGA/CV594/2020]	SKXXXXXXXXXVLLSVLQQLRVESSSKLWAQCVQLHNDILLAKDTTEAFEKMVSLLSVLLSMQGAVDINKLCEEMLDNRATLQ
UDE18757.1:3860-3942 (4)	nsp7 [polyprotein=ORF1a polyprotein] [organism=Severe acute respiratory syndrome coronavirus 2] [isolate=SARS-CoV-2/human/USA/CO-CDPHE-2005060862/2020]	SKMSDVKXXXXXXXXXLQQLRVESSSKLXXXXXXXXXXXXXXXXXXXXXXXXXXXXXXXXXXXXXXXXXXXXXXXXXXXXXXX
UPB54879.1:3860-3942 (4)	nsp7 [polyprotein=ORF1ab polyprotein] [organism=Severe acute respiratory syndrome coronavirus 2] [isolate=SARS-CoV-2/human/FRA/IHUCOVID-056841_Nova1/2021]	SKMSDVKCTSVVLLSVLQQLRVESXSKLWAQCVQLHNDILLAKDTTEAFEKMVSLLSVLLSMQGAVDINKLCXEMLDNRATLQ
UQG79511.1:3838-3920 (4)	nsp7 [polyprotein=ORF1ab polyprotein] [organism=Severe acute respiratory syndrome coronavirus 2] [isolate=SARS-CoV-2/human/USA/TG1026284/2021]	XXXXXXXXXXXXXXXXXXXXXXXXXXXXXXXXXXXHNDILLAKDTTEAFEKMVSLLSVLLSMQGAVDINKLCEEMLNNRATLQ
UPW44722.1:3835-3917 (4)	nsp7 [polyprotein=ORF1ab polyprotein] [organism=Severe acute respiratory syndrome coronavirus 2] [isolate=SARS-CoV-2/human/USA/WA-UW-22040712091/2022]	SKMSDVKCTSVVLLSVLQQLRVXXXXXXXXQCVQLHNDILLAKDTTEAFEKMVSLLSVLLSMQGAVDINKLCEEMLDNRATLQ
UEY27886.1:3860-3942 (4)	nsp7 [polyprotein=ORF1a polyprotein] [organism=Severe acute respiratory syndrome coronavirus 2] [isolate=SARS-CoV-2/human/USA/CA-CDC-STM-000622285/2021]	SKMSDVKCTSVVLLSVLQQLRVESSSKLWAQCVXXXNDILLAKDTTEAFEKMVSLLSVLLSMQGAVDINKLCEEMLNNRATLQ
UIZ59984.1:3833-3915 (4)	nsp7 [polyprotein=ORF1ab polyprotein] [organism=Severe acute respiratory syndrome coronavirus 2] [isolate=SARS-CoV-2/human/USA/CO-CDPHE-2102509359/2021]	SKMSDVKCTSVVLLSVLQQLRVESSSKLWAQCVQLHNDILLAKDTTEAFXXXXXXXXXXXXXXXXXXXXXXXXXXXXXXXXXX
UDL63802.1:3860-3942 (4)	nsp7 [polyprotein=ORF1ab polyprotein] [organism=Severe acute respiratory syndrome coronavirus 2] [isolate=SARS-CoV-2/human/USA/WV-CDC-ASC210381232/2021]	XXXSDVXXTSVVLLSVLQQLRVESSSKLWAQCVQLHNDILLAKDTTEAFEKMVSLLSVLLSMQGAVDINKLCEEMLDNRATLQ
QOE79973.1:3860-3942 (4)	nsp7 [polyprotein=ORF1a polyprotein] [organism=Severe acute respiratory syndrome coronavirus 2] [isolate=SARS-CoV-2/human/USA/UT-01675/2020]	XKXXXXXXXSVVLLSVLQQLRVESSSKLWAQCVQLHNDILLAKDTTEAFEKMVSLLSVLLSMQGAVDINKLCEEMLDNRATLQ
QIU81823.1:3860-3942 (4)	nsp7 [polyprotein=ORF1ab polyprotein] [organism=Severe acute respiratory syndrome coronavirus 2] [isolate=SARS-CoV-2/human/CHN/Beijing_IME-BJ01/2020]	SKMSDVKCTSVVLLSVLQQLRVESSSKLWAQYVQLHNDILLAKDTTEAFEKMVSLLSVLLSMQGAVDINKLCEEMLDNRATLQ
UTH40953.1:3830-3912 (4)	nsp7 [polyprotein=ORF1ab polyprotein] [organism=Severe acute respiratory syndrome coronavirus 2] [isolate=SARS-CoV-2/human/USA/FL-BPHL-10414/2022]	SKMSDVKCTSVVLLSVLXXXXXXXXXXXXXXXXXXXXXXXXAKDTTEAFEKMVSLLSVLLSMQGAVDINKLCEEMLDNRATLQ
UDO70663.1:3860-3942 (4)	nsp7 [polyprotein=ORF1a polyprotein] [organism=Severe acute respiratory syndrome coronavirus 2] [isolate=SARS-CoV-2/human/USA/CA-CDPH-500004452/2021]	SKMSDVKCTSVVLLSVLXXXXXXXXXXLWAQCVQLHNDILLAKDTTEAFEKMVSLLSVLLSMQGAVDINKLCEEMLDNRATLQ
UDO26436.1:3860-3942 (4)	nsp7 [polyprotein=ORF1ab polyprotein] [organism=Severe acute respiratory syndrome coronavirus 2] [isolate=SARS-CoV-2/human/USA/CA-CDPH-2000015746/2020]	SKMSDVKCTSVVLLSVLQQLRVESSSKLWAQCIQLHNDILLAKDTTEAFGKMVSLLSVLLSMQGAVDINKLCEEMLDNRATLQ
UIO04199.1:3857-3939 (4)	nsp7 [polyprotein=ORF1ab polyprotein] [organism=Severe acute respiratory syndrome coronavirus 2] [isolate=SARS-CoV-2/human/USA/IL-CDC-ASC210642136/2021]	SKMSDVKCTSVVLLSVLQQLRVESSSKLWAQCVQLHNDILLAKDTTEAFEKMVSLLSVLLSMQGAVXXXKLCEEMLDNRXXXX
UNG75849.1:3856-3938 (4)	nsp7 [polyprotein=ORF1ab polyprotein] [organism=Severe acute respiratory syndrome coronavirus 2] [isolate=SARS-CoV-2/human/USA/GA-CDC-MMB14496878/2022]	SKMSDVKCTSVVLLSVLQQLRVESSSKLWAQCVQLHNDILLAKDTTEAFEKMVSLLSXLXSMQGAVDINKLCEEMLDNRATLQ
WDZ19397.1:3745-3827 (4)	nsp7 [polyprotein=ORF1ab polyprotein] [organism=Severe acute respiratory syndrome coronavirus 2] [isolate=SARS-CoV-2/human/USA/WI-UW-14896/2023]	SKMSDVKCTSVVLLSVLQQLRVESSSKLWAQCVQLHNDILLAKDTTEAFEKMVSLXXXXXXXXXXXXXXXXXEEMLDNXXXXX
WCL08691.1:3857-3939 (4)	nsp7 [polyprotein=ORF1ab polyprotein] [organism=Severe acute respiratory syndrome coronavirus 2] [isolate=SARS-CoV-2/human/USA/MD-MDH-7232/2022]	XXXXXXXXXSVVXXXXXQQLRVESSSKLWAQCVQLHNDILLAKDTTEAFEKMVSLLSVLLSMQGAVDINKLCEEMLDNRATLQ
UYO57580.1:3830-3912 (4)	nsp7 [polyprotein=ORF1ab polyprotein] [organism=Severe acute respiratory syndrome coronavirus 2] [isolate=SARS-CoV-2/human/USA/FL-BPHL-14848/2022]	XXXXXVKCTSVVLLSVLQQLRVESSSKLWAQCVQLHNDXXXAKDTTEAFEKMVSLLSVLLSMQGAVDINKLCEEMLDNRATLQ
UGB79493.1:3860-3942 (4)	nsp7 [polyprotein=ORF1ab polyprotein] [organism=Severe acute respiratory syndrome coronavirus 2] [isolate=SARS-CoV-2/human/USA/WI-CDC-ASC210427553/2021]	SKMSDVKCTSVILLSVLQQLRVESLSKLWAQCVQLHNDILLAKDTTEAFEKMVSLLSVLLSMQGAVDINKLCEEMLDNRATLQ
UVD29373.1:3857-3939 (4)	nsp7 [polyprotein=ORF1ab polyprotein] [organism=Severe acute respiratory syndrome coronavirus 2] [isolate=SARS-CoV-2/human/USA/CA-CDC-QDX39798828/2022]	SKMSDVKCTSVVLLSVLQQLRVESSSKLWAQCVQLHNDILLAKDTTEAFEKMVSLLSVLLSMRGAVDINKFCEEMLDNRATLQ
UQH15869.1:3856-3938 (4)	nsp7 [polyprotein=ORF1ab polyprotein] [organism=Severe acute respiratory syndrome coronavirus 2] [isolate=SARS-CoV-2/human/USA/TG1150956/2022]	SKMSDVKCTSVVLLSVXQQLRVESSSKLXAQCVQLHNDILLAKDTTEAFEKMVSLLSVLLSMQGAVDINKLCEEMLDNRATLQ
UCA91460.1:3860-3942 (4)	nsp7 [polyprotein=ORF1a polyprotein] [organism=Severe acute respiratory syndrome coronavirus 2] [isolate=SARS-CoV-2/human/USA/WV-CDC-ASC210196028/2021]	SKMSDVKCTSVVLLSVLQQLXVESSSKLWAQCVQLHNDILLAKDTTEAFEKMVSLLSVLLSMQGAVDINKLCEEMLDNRATLX
UGC60601.1:3860-3942 (4)	nsp7 [polyprotein=ORF1a polyprotein] [organism=Severe acute respiratory syndrome coronavirus 2] [isolate=SARS-CoV-2/human/USA/NM-CDC-ASC210454176/2021]	SKMSDVKCTSXVLLSVLQQLRVESSSKLWAQCVQLHNDILLAKDTTEAFEKMVSLLSVLLSMQGAVDINKLCEEMLDNRATLX
UCR49039.1:3860-3942 (4)	nsp7 [polyprotein=ORF1ab polyprotein] [organism=Severe acute respiratory syndrome coronavirus 2] [isolate=SARS-CoV-2/human/USA/NE-CDC-ASC210085113/2021]	SKMSDVKCTSVVLLSVLQQLXXESSSKLWAQCVQLHXXILLAKDTTEAFEKMVSLLSVLLSMQGAVDINKLCEEMLDNRATXX
UQQ84626.1:3856-3938 (4)	nsp7 [polyprotein=ORF1ab polyprotein] [organism=Severe acute respiratory syndrome coronavirus 2] [isolate=SARS-CoV-2/human/USA/TG989067/2022]	SKMSDVKCTSVVLLSVLQQLRVESSSKLWAQCVQLHNDILLAKDTTEAFEKMVSLPSVLLSMQGAVDINKLCEEMLDNRATLQ
UQD10137.1:3832-3914 (4)	nsp7 [polyprotein=ORF1ab polyprotein] [organism=Severe acute respiratory syndrome coronavirus 2] [isolate=SARS-CoV-2/human/FRA/IHUCOVID-066701_Nova1/2022]	SKMSDVKCTSVVLLSVLQQLRVESSXXXXXXXXXXXXXXXXAKDTTEAFEKMVSLLSVLLSMQGAVDINKLCEEMLDNRATLQ
UCV88673.1:3860-3942 (4)	nsp7 [polyprotein=ORF1ab polyprotein] [organism=Severe acute respiratory syndrome coronavirus 2] [isolate=SARS-CoV-2/human/USA/KS-CDC-LC0311789/2021]	SKMSDVKCTSVVLLSVLQQLRVESSSKLWAQCVQLHNDILLAKDTTEAFGKMVSLLSALLSMQGAVDINKLCEEMLDNRATLQ
URG46926.1:3857-3939 (4)	nsp7 [polyprotein=ORF1ab polyprotein] [organism=Severe acute respiratory syndrome coronavirus 2] [isolate=SARS-CoV-2/human/USA/VA-VTVAS3-GSC34556/2022]	SKMSDVKCTSXXXXXXXXXXXXXXXXXXXXXXXXXHNDILLAKDTTEAFEKMVSLLSVLLSMQGAVDINKLCEEMLDNRATLQ
UDK47580.1:3860-3942 (4)	nsp7 [polyprotein=ORF1ab polyprotein] [organism=Severe acute respiratory syndrome coronavirus 2] [isolate=SARS-CoV-2/human/USA/WI-CDC-ASC210279229/2021]	SKMSDVKCTSVVLLSVLQQLRVESSSKLWAQCVQLHNDILXXXXXXEAFEKMVSLLSVLLSMQGAVXINKLCEEMLDNRXXXX
UST45994.1:3857-3939 (4)	nsp7 [polyprotein=ORF1ab polyprotein] [organism=Severe acute respiratory syndrome coronavirus 2] [isolate=SARS-CoV-2/human/USA/TG1343037/2022]	XXXSDVXCTSVVLLSVLQQLRVESSSKLWAQCVQLHNDILLAKDTTEAFEKMVSLLSVLLSMQGAVDINKLCEEMLDNRATLQ
UCN27297.1:3860-3942 (4)	nsp7 [polyprotein=ORF1ab polyprotein] [organism=Severe acute respiratory syndrome coronavirus 2] [isolate=SARS-CoV-2/human/USA/NV-NSPHL-LV393720/2021]	SKMSDVKCTSVVLLSVLQQLRVESSSKLXAXXXQLHNDILLAKDTTEAFEKMVSLLSVLLSMQGAVDINKLCEEMLDNRATLQ
UYL52395.1:3857-3939 (4)	nsp7 [polyprotein=ORF1ab polyprotein] [organism=Severe acute respiratory syndrome coronavirus 2] [isolate=SARS-CoV-2/human/USA/DE-DHSS-B1227316/2022]	XXXXXXXXXSVVXXXXXXXXXXXXXXXXXXXXXXXXXXXXXXXXXXXXXXXXXXXXXXXXXXXXXXXXXXXXXXXXXXXXXXX
UFS22609.1:3860-3942 (4)	nsp7 [polyprotein=ORF1ab polyprotein] [organism=Severe acute respiratory syndrome coronavirus 2] [isolate=SARS-CoV-2/human/USA/CO-CDPHE-2102008076/2021]	SKMSDVKCTSVVLLSVLQQLRVESSSKLWAQCVQLHNDILLAKDTTEAFEXMVSLLSVLLSMQGAVDINKLCEEMLDNRATLQ
UGB75617.1:3851-3933 (4)	nsp7 [polyprotein=ORF1ab polyprotein] [organism=Severe acute respiratory syndrome coronavirus 2] [isolate=SARS-CoV-2/human/USA/MN-CDC-ASC210426955/2021]	SKMSDVKCTSVVLLSVLQQLRVESSSKLWAQCVQLHNDILLAKDTTEAFEKMVSLLSVLLSXXXXXXXXXXXXXXXDNRAXXX
UPE94111.1:3847-3929 (4)	nsp7 [polyprotein=ORF1ab polyprotein] [organism=Severe acute respiratory syndrome coronavirus 2] [isolate=SARS-CoV-2/human/FRA/IHUCOVID-001127/2020]	XXXXXXXXXXXXXXXXXXXXXVESSSKLWAQCVQLHNDILLAKDTTEAFEKMVSLLSVLLSMQGAVDINKLCEEMLDNRAXXX
UNA91504.1:3830-3912 (4)	nsp7 [polyprotein=ORF1ab polyprotein] [organism=Severe acute respiratory syndrome coronavirus 2] [isolate=SARS-CoV-2/human/USA/FL-BPHL-3416/2022]	XXXXXXXCTSVVLLXXXXXXXXXXXXXXXXXXXXXXXXXXXAKDTTEAFEKMVSLLSVLLSMQGAVDINKLCEEMLDNRATLQ
UDQ03209.1:3860-3942 (4)	nsp7 [polyprotein=ORF1a polyprotein] [organism=Severe acute respiratory syndrome coronavirus 2] [isolate=SARS-CoV-2/human/USA/NH-CDC-ASC210380458/2021]	SKMSDVKCTSVVLLSVLQQLRVESSSKLWAQCVQLHNDILLAXXXTEAFEKMVSLLSVLLSMQGAVDINKLCEEMLDNRAXXX
UOW86007.1:3857-3939 (4)	nsp7 [polyprotein=ORF1ab polyprotein] [organism=Severe acute respiratory syndrome coronavirus 2] [isolate=SARS-CoV-2/human/USA/SC-COVID22-1447/2022]	SKMSDVKCTSVVLLSVLQQLRVESSSKLWAQXXXXXNDILLAKDTTEAFEKMVSLLSVLLSMQGAVDINKLCEEMLDNRATLQ
ULE18924.1:3856-3938 (4)	nsp7 [polyprotein=ORF1ab polyprotein] [organism=Severe acute respiratory syndrome coronavirus 2] [isolate=SARS-CoV-2/human/USA/AL-CDC-ASC210649611/2022]	XXXXXXXXXXXXXXXXXXXXXXESSSXXXXXXXQLHNDILLAKDTTEAFEKMVSLLSVLLSMQGAVDINKLCEEMLDNRATLQ
UEE58408.1:3860-3942 (4)	nsp7 [polyprotein=ORF1ab polyprotein] [organism=Severe acute respiratory syndrome coronavirus 2] [isolate=SARS-CoV-2/human/USA/PA-CDC-STM-000743126/2021]	SKMSDVKCTSVVLLSVLQQLRVVSSSKLWAQCVQLHNDILLAKDTTEAFEKMVSLLSVLLSMQGAVDINKLCEEMLDNRATLQ
UCO93214.1:3860-3942 (4)	nsp7 [polyprotein=ORF1ab polyprotein] [organism=Severe acute respiratory syndrome coronavirus 2] [isolate=SARS-CoV-2/human/USA/WA-S12290/2021]	SKMSDVKCTSVVLLSVLQQLRVESSSKLWAQCVQLHNDILLAKDTTEAFEKMVSLLSVLLSMQGAVDINKLCEEMLDNXXTLQ
UQM98742.1:3860-3942 (4)	nsp7 [polyprotein=ORF1a polyprotein] [organism=Severe acute respiratory syndrome coronavirus 2] [isolate=SARS-CoV-2/human/USA/TG1175493/2021]	XXMSXVKCTSVVLLSVLQQLRVESSSKLWAQCVQLHNDILLAKDTTEAFEKMVSLLSVLLSMQGAVDINKLCEEMLDNRATLQ
UEM47303.1:3860-3942 (4)	nsp7 [polyprotein=ORF1a polyprotein] [organism=Severe acute respiratory syndrome coronavirus 2] [isolate=SARS-CoV-2/human/USA/SC-CDC-ASC210335059/2021]	SKMSDVKCTSVVLLSVLQQXXVESSSKLWAQCVQLHNDILLAKDTTEAFEKMVSLLSVLLSMQGAVXINKLCEEMLDNRAXXX
USF48554.1:3857-3939 (4)	nsp7 [polyprotein=ORF1ab polyprotein] [organism=Severe acute respiratory syndrome coronavirus 2] [isolate=SARS-CoV-2/human/USA/CA-CDC-LC0686914/2022]	SKMSNVKCTSVVLLSVLQQLRVESSSKLWAQCVQLHNDILLAKDTTEAFEKMVSLLSVLLSMQGAVDINKLCEEMLDNRATLQ
USW89091.1:3857-3939 (4)	nsp7 [polyprotein=ORF1ab polyprotein] [organism=Severe acute respiratory syndrome coronavirus 2] [isolate=SARS-CoV-2/human/USA/TG1309143/2022]	SKMSDVKCTSVVXXXXXXXXXXXXXXXXXXQCVQLHNDILLAKDTTEAFEKMVSLLSVLLSMQGAVDINKLCEEMLDNRATLQ
UJR93159.1:3728-3810 (4)	nsp7 [polyprotein=ORF1ab polyprotein] [organism=Severe acute respiratory syndrome coronavirus 2] [isolate=SARS-CoV-2/human/USA/21079711/2021]	SKMSDVKCTSVVLLSVLQQLRVESSSKLWAQCVXXXXXXXXXXXXXXXXXXXXXXLSVLLXXXXXXXXXXXXXXXXXXRATXX
USV05154.1:3860-3942 (4)	nsp7 [polyprotein=ORF1ab polyprotein] [organism=Severe acute respiratory syndrome coronavirus 2] [isolate=SARS-CoV-2/human/USA/TG1259222/2021]	XXXXXXXXXXXXXXXXXXQLRVXSSSKLWAQCVQLHNDILLAKDTTEAFEKMVSLLSVLLSMQGAVDINKLCEEMLDNRATLQ
ULB72696.1:3830-3912 (4)	nsp7 [polyprotein=ORF1ab polyprotein] [organism=Severe acute respiratory syndrome coronavirus 2] [isolate=SARS-CoV-2/human/USA/RRGN850788/2022]	SKMSDVKCTSVVLLSVLQQLRVESSSKLXXXXXXXXXXXXXXXXXXXXXXXMVSLLSVLLSMQGAVDINKLCEEMLDNRATLQ
UQH32162.1:3857-3939 (4)	nsp7 [polyprotein=ORF1ab polyprotein] [organism=Severe acute respiratory syndrome coronavirus 2] [isolate=SARS-CoV-2/human/USA/TG1190319/2022]	XKXXDVKCTSVVLLSVLQQLRVESSSKLWAQCVQLHNDILLAKDTTEAFEKMVSLLSVLLSMQGAVDINKLCEEMLDNRATLQ
UDO05788.1:3860-3942 (4)	nsp7 [polyprotein=ORF1a polyprotein] [organism=Severe acute respiratory syndrome coronavirus 2] [isolate=SARS-CoV-2/human/USA/CA-CDPH-3000190805/2021]	SKMSDVKCTSVXXXXVLQQLRVESSSKLWAQCVQLHNDILLAKDTTEAFEKMVSLLSVLLSMQGAVDINKLCEEMLDNRATLQ
UQH20244.1:3838-3920 (4)	nsp7 [polyprotein=ORF1ab polyprotein] [organism=Severe acute respiratory syndrome coronavirus 2] [isolate=SARS-CoV-2/human/USA/TG1109680/2021]	SKMXXXXXXXXXXXXXXXXXXXXXXXXXXXXXVQLHNDILLAKDTTEAFEKMVSLLSVLLSMQGAVDINKLCEEMLDNRATLQ
UXL80532.1:3856-3938 (4)	nsp7 [polyprotein=ORF1ab polyprotein] [organism=Severe acute respiratory syndrome coronavirus 2] [isolate=SARS-CoV-2/human/BEN/704686/2021]	SKMSDVKCTSVVLLSVLQQLRVESSSKLWAQCVQXXXXXLLAKDTTEAFEKMVSLLSVLLSMQGAVDINKLCEEMLDNRATLQ
UXK43013.1:3722-3804 (4)	nsp7 [polyprotein=ORF1a polyprotein] [organism=Severe acute respiratory syndrome coronavirus 2] [isolate=SARS-CoV-2/human/USA/CO-CDPHE-2103603459/2022]	XXXXXXXXXXXXXXXXXXXXXXXXXXXXXXXXXXXXXXXXXXXXXXXXXXXXXXXXXXLLSMQGAVDINKLCEEMLDNRATLQ
QTZ44755.1:3860-3942 (4)	nsp7 [polyprotein=ORF1ab polyprotein] [organism=Severe acute respiratory syndrome coronavirus 2] [isolate=SARS-CoV-2/human/USA/CA-UCSF-UC870/2020]	SKMSDVKCTSVVLLSVLQQLRVESSSKLWAQCVQLHNDILLAKDTTEAFEKMVSLLSVLLSMXXAVDINKLCEEMLDNRATLQ
UCR20515.1:3860-3942 (4)	nsp7 [polyprotein=ORF1ab polyprotein] [organism=Severe acute respiratory syndrome coronavirus 2] [isolate=SARS-CoV-2/human/USA/TN-CDC-ASC210129176/2021]	SKMSDVKCTSVVLLSVLQQLRVESSSKLWAQCVQLHNDILLAKXXXEAFEKMVSLLSVLLSMQGAVDINKLCEEMLXXRATLX
UEI92725.1:3860-3942 (4)	nsp7 [polyprotein=ORF1ab polyprotein] [organism=Severe acute respiratory syndrome coronavirus 2] [isolate=SARS-CoV-2/human/USA/MD-CDC-LC0343835/2021]	SKMSDVKCTSVVLLSVLQQLRVESSSKLWAQCCQLHNDILLAKDTTEAFEKMVSLLSVLLSMQGAVDINKLCEEMLDNRATLQ
UCI45897.1:3860-3942 (4)	nsp7 [polyprotein=ORF1a polyprotein] [organism=Severe acute respiratory syndrome coronavirus 2] [isolate=SARS-CoV-2/human/USA/CA-CDPH-3000140149/2021]	SKMSDVKCTSVVLLSXLQQLRVESSSKLWAQCVQLHNDILLAKDTTEAFEKMVSLLSVLLSMQGAVDINKLCEEMLNNRATLQ
UPE97607.1:3860-3942 (4)	nsp7 [polyprotein=ORF1ab polyprotein] [organism=Severe acute respiratory syndrome coronavirus 2] [isolate=SARS-CoV-2/human/FRA/IHUCOVID-001328/2020]	SKMSDVKCTSVVXXXXXXXLRVESSSKLWAQCVQLHNDILLAKDTTEAFEKMVSLLSVLLSMQGAVDINKLCEEMLDNRATLQ
WEX73261.1:3854-3936 (4)	nsp7 [polyprotein=ORF1ab polyprotein] [organism=Severe acute respiratory syndrome coronavirus 2] [isolate=SARS-CoV-2/human/USA/MD-MDH-8580/2023]	XXXXXXXXXXXXXXXXXXXXXVESSSKLWAQCXQLHNDILLAKDTTEAFEKMVSLLSVLLSMQGAVDINKLCEEMLDNRATLQ
UCK91750.1:3860-3942 (4)	nsp7 [polyprotein=ORF1ab polyprotein] [organism=Severe acute respiratory syndrome coronavirus 2] [isolate=SARS-CoV-2/human/USA/OH-CDC-ASC210411821/2021]	SKMSDVKCTSVVLLSVLQQLRVESSSKLWAQCVQLHNDILXXXXXXEAFEKMVSLLSVLLSMQGAVDINKLCEEMLDNRATXX
WAY33238.1:3857-3939 (4)	nsp7 [polyprotein=ORF1a polyprotein] [organism=Severe acute respiratory syndrome coronavirus 2] [isolate=SARS-CoV-2/human/USA/CA-CDPH-FS48078215/2022]	XKMSDVXXXXXXXXXXXXXXXXXXXXXXXXXXXXXHNDILLAKDTTEAFEKMVSLLSVLLSMQGAVDINKLCEEMLDNRATLQ
UHI42517.1:3860-3942 (4)	nsp7 [polyprotein=ORF1a polyprotein] [organism=Severe acute respiratory syndrome coronavirus 2] [isolate=SARS-CoV-2/human/USA/IN-CDC-ASC210525596/2021]	SKMSDVKCTSXVLLSVLQQLRVESSSKLWAQCVQLHNDILLAKDTTEAFEKMVSLLSVLLSMQGAVDINKLCEEMLDNRAXXQ
UYL38727.1:3827-3909 (4)	nsp7 [polyprotein=ORF1ab polyprotein] [organism=Severe acute respiratory syndrome coronavirus 2] [isolate=SARS-CoV-2/human/USA/FL-BPHL-13866/2022]	SKMSDVKCTSVVLLSVLQQXXXXXXXXXXXXXXXXXXXXXXAKDTTEAFEKMVSLLSVLLSMQGAVDINKLCEEMLDNRATLQ
UQG84102.1:3830-3912 (4)	nsp7 [polyprotein=ORF1ab polyprotein] [organism=Severe acute respiratory syndrome coronavirus 2] [isolate=SARS-CoV-2/human/USA/TG1063341/2021]	SKMSDVKCTSVVLLSVLQQLRVESSSKLWAQCVQLHNDILLAKDTTEAFEKMVSLLSVLLSMQGXVXXXXXXXXXXXXXXXXX
URP89530.1:3857-3939 (4)	nsp7 [polyprotein=ORF1ab polyprotein] [organism=Severe acute respiratory syndrome coronavirus 2] [isolate=SARS-CoV-2/human/USA/TX-CDC-STM-NBBBWCJEV/2022]	SKMSDVKCTSVVLLSVLQQLRVESSSKLWAQCVQLHNDILLAKDTTEAFEKMVSLLSVLLSMQGAVDINKLCVEMLDNRATLQ
UOG97856.1:3860-3942 (4)	nsp7 [polyprotein=ORF1ab polyprotein] [organism=Severe acute respiratory syndrome coronavirus 2] [isolate=SARS-CoV-2/human/USA/6932/2020]	SXXXXXXXXXXXXXXXXXXXXXXXXXXXXXXXXXXHNDILLAKDTTEAFEKMVSLLSVLLSMQGAVDINKLCEEMLDNRATLQ
UJR04236.1:3832-3914 (4)	nsp7 [polyprotein=ORF1ab polyprotein] [organism=Severe acute respiratory syndrome coronavirus 2] [isolate=SARS-CoV-2/human/USA/21081630/2021]	SKMSDVKCTSVVLLSVLQQLRVESSSKLWAQCVXXXXXXXXXXXXXXAFEKXXXXLSVLLXXXXXXXXXXXXXXXXXXXXXXX
WEP66674.1:3727-3809 (4)	nsp7 [polyprotein=ORF1a polyprotein] [organism=Severe acute respiratory syndrome coronavirus 2] [isolate=SARS-CoV-2/human/USA/PR-CVL-001667/2022]	SKMSDVKCTSVVLLSVLQQLRVESSSXXXXXXXXXXXXXXXXXXXTEAFEKMVSLLSVLLSMQGAVDINKLCEEMLDNRATLQ
UIL02263.1:3860-3942 (4)	nsp7 [polyprotein=ORF1ab polyprotein] [organism=Severe acute respiratory syndrome coronavirus 2] [isolate=SARS-CoV-2/human/USA/OKPHLCOV0006475/2021]	SKMSDVKCTXXXXXXVLQQLRVESSSKLWAQCVQLHNDILLAKDTTEAFEKMVSLLSVLLSMQGAVDINKLCEEMLDNRATLQ
ULL73122.1:3856-3938 (4)	nsp7 [polyprotein=ORF1ab polyprotein] [organism=Severe acute respiratory syndrome coronavirus 2] [isolate=SARS-CoV-2/human/USA/CO-CDC-MMB14088883/2022]	SKMSDVKCTSVVVLSVLQQLRVESSSKLWAQCVQLHNDILLAKDTTEAFEKMVSLLSVLLSMQGAVDINKLCEEMLDNRATLQ
UTO60662.1:3857-3939 (4)	nsp7 [polyprotein=ORF1ab polyprotein] [organism=Severe acute respiratory syndrome coronavirus 2] [isolate=SARS-CoV-2/human/USA/IL-CDC-STM-K9A2PZX78/2022]	SKMSDVKCTSVVLLSVLQQLRVESSSKLWAQCVQLHNDILLAKDTTEAFEKMVSLLSVLLSIQGAVDINKLCEEMLNNRATLQ
UFK04792.1:3834-3916 (4)	nsp7 [polyprotein=ORF1ab polyprotein] [organism=Severe acute respiratory syndrome coronavirus 2] [isolate=SARS-CoV-2/human/USA/CO-CDPHE-2101600469/2021]	SKXXDVKXXXXXXXXXLQQLRVESSSKLWAQCVQLHNDILLAKDTTEAFEKMVSLLSVLLSMQGAVDINKLCEEMLDNRATLQ
UQD07350.1:3829-3911 (4)	nsp7 [polyprotein=ORF1ab polyprotein] [organism=Severe acute respiratory syndrome coronavirus 2] [isolate=SARS-CoV-2/human/FRA/IHUCOVID-063106_Nova2/2022]	SKMSDVKCTSVVLLXXXQQLRVESSSKLWAQXXXXXXXXXXAKDTTEAFEKMVSLLSVLLSMQGAVDINKLCEEMLDNRATLQ
UUB70516.1:3833-3915 (4)	nsp7 [polyprotein=ORF1ab polyprotein] [organism=Severe acute respiratory syndrome coronavirus 2] [isolate=SARS-CoV-2/human/USA/KPL-336 Nasal Swab/2021]	XXXXXXXXXXVVLLXXXXXXXXXXXXXXXXXXXXXXXXXXXAKDTTEAFEKMVSLLSVLLSMQGAVDINKLCEEMLDNRATLQ
UQH16071.1:3860-3942 (4)	nsp7 [polyprotein=ORF1ab polyprotein] [organism=Severe acute respiratory syndrome coronavirus 2] [isolate=SARS-CoV-2/human/USA/TG1158021/2022]	XXXXXXXXXXXXXXXXXXXXXXXXXXXXXXXXXXXXXXXXXXXXXXXXXXXXXXXXXXXXXXXXXXXXXXXXXXXXXXXXXLX
WAU63632.1:3857-3939 (4)	nsp7 [polyprotein=ORF1ab polyprotein] [organism=Severe acute respiratory syndrome coronavirus 2] [isolate=SARS-CoV-2/human/USA/UT-CDC-LC0956748/2022]	SKMSDVKCTSVVLLSVLQQLRVESSSKLWAQCVQLHNDILLAKDTTEAFEKMVSLLSVLLSMRGAVDITKLCEEMLDNRATLQ
UQG81897.1:3860-3942 (4)	nsp7 [polyprotein=ORF1ab polyprotein] [organism=Severe acute respiratory syndrome coronavirus 2] [isolate=SARS-CoV-2/human/USA/TG1029061/2021]	XXXXXXXXXXXXXXXXXXXXXXXXXXXXXXXXXXXXXXXXXXXXXXXXXXXXXXLXSVLLSMQGAVDINKLCEEMLDNRATLQ
UBD58105.1:3860-3942 (4)	nsp7 [polyprotein=ORF1ab polyprotein] [organism=Severe acute respiratory syndrome coronavirus 2] [isolate=SARS-CoV-2/human/USA/NC-CDC-ASC210105181/2021]	XXXSDXXCTSVVLLSVLQQLRVESSSKLWAQCVQLHNDILLAKDTTEAFEKMVSLLSVLLSMQGAVDINKLCEEMLDNRATLQ
UDP12457.1:3860-3942 (4)	nsp7 [polyprotein=ORF1ab polyprotein] [organism=Severe acute respiratory syndrome coronavirus 2] [isolate=SARS-CoV-2/human/USA/MN-CDC-IBX046351507068/2021]	XXXSXXXXXSVVLLSVLQQLRVESSSKLWAQCVQLHNDILLAKDTTEAFEKMVSLLSVLLSMQGAVDINKLCEEMLDNRATLQ
UBP81082.1:3860-3942 (4)	nsp7 [polyprotein=ORF1a polyprotein] [organism=Severe acute respiratory syndrome coronavirus 2] [isolate=SARS-CoV-2/human/USA/CA-CDPH-3000126145/2021]	SKMSDVKCTSVVLLSXLQQLRVESSFKLWAQCVQLHNDILLAKDTTEAFEKMVSLLSVLLSMQGAVDINKLCEEMLDNRATLQ
UBN11066.1:3859-3941 (4)	nsp7 [polyprotein=ORF1ab polyprotein] [organism=Severe acute respiratory syndrome coronavirus 2] [isolate=SARS-CoV-2/human/USA/UT-UPHL-210919414666/2021]	SKMSDVKCTSVVLLSVLQQLRVESSSKLWAQCVQXXXXXXXXXXXXXXXXXXXXXLSVLLXXXXXXXXXXXXXXXXXXXXXXX
UJR93618.1:3838-3920 (4)	nsp7 [polyprotein=ORF1ab polyprotein] [organism=Severe acute respiratory syndrome coronavirus 2] [isolate=SARS-CoV-2/human/USA/21080027/2021]	SKMSDVKCTSVVLLSVLQQLRVESSSKLWAQCVXXXXXXXXXXXXXXXXXXXXXXXXXXXXXXXXXXXXXXXXXXLDNRAXXX
WEP70008.1:3691-3773 (4)	nsp7 [polyprotein=ORF1a polyprotein] [organism=Severe acute respiratory syndrome coronavirus 2] [isolate=SARS-CoV-2/human/USA/PR-CVL-003181/2022]	SKMSDVKCTSVVLLSVLQQLRXXXXXXXXXXXXXXXXXXXXXXXXTEAFEKMVSLLSVLLSMQGAVDINKLCEEMLDNRATLQ
UNG60473.1:3856-3938 (4)	nsp7 [polyprotein=ORF1ab polyprotein] [organism=Severe acute respiratory syndrome coronavirus 2] [isolate=SARS-CoV-2/human/USA/CA-OC-2493/2022]	SKMSDVKCTSVVLLSVLQQLRVESSSKLWAXXXXXXXXXXXAKDTTEAFEKMVSLLSVLLSMQGAVDINKLCEEMLDNRATLQ
UBX84087.1:3860-3942 (4)	nsp7 [polyprotein=ORF1ab polyprotein] [organism=Severe acute respiratory syndrome coronavirus 2] [isolate=SARS-CoV-2/human/USA/UT-UPHL-211003417924/2021]	SKMSDVKCTSVVLLSVLQQLRVESSSKLXXXXXXXXXXXXXXXXXXXXXXXXXXXLSVLLXXXXXXXXXXXXXXXXXXXXXXX
QKV39549.1:3860-3942 (4)	nsp7 [polyprotein=ORF1ab polyprotein] [organism=Severe acute respiratory syndrome coronavirus 2] [isolate=SARS-CoV-2/human/USA/WA-S1193/2020]	SKMSDVKCTSVVLLSVLQQLRVESSSKLXXXXXXXHNDILLAKDTTEAFEKMVSLLSVLLSMQGAVDINKLCEEMLDNRATLQ
UDQ07632.1:3860-3942 (4)	nsp7 [polyprotein=ORF1ab polyprotein] [organism=Severe acute respiratory syndrome coronavirus 2] [isolate=SARS-CoV-2/human/USA/MD-CDC-ASC210320852/2021]	FKMSDVKCTSVVLLSVLQQLRVESSSKLWAQCVQLHNDILLAKDTTEAFEKMVSLLSVLLSMQGAVDINKLCEEMLDNRATLQ
UBP12311.1:3860-3942 (4)	nsp7 [polyprotein=ORF1ab polyprotein] [organism=Severe acute respiratory syndrome coronavirus 2] [isolate=SARS-CoV-2/human/USA/TX-CDC-ASC210132956/2021]	SKMSDVKCTSVVLLSVLQQLRVESSSKLWAQCVQLHNDILLAKDTTEAFEKMVSLLSVLLSMQGAVDINKLCEKMLDNRATLQ
UQH53825.1:3854-3936 (4)	nsp7 [polyprotein=ORF1ab polyprotein] [organism=Severe acute respiratory syndrome coronavirus 2] [isolate=SARS-CoV-2/human/USA/TG1258870/2022]	XXXXXXXCTSVVLLSVLQQLRVESSSKLWAQXVQLHNDILLAKDTTEAFEKMVSLLSVLLSMQGAVDINKLCEEMLDNRATLQ
UPY88035.1:3857-3939 (4)	nsp7 [polyprotein=ORF1ab polyprotein] [organism=Severe acute respiratory syndrome coronavirus 2] [isolate=SARS-CoV-2/human/USA/VA_FBCH_2711/2022]	SKMSDVKCTSVVLLSVLQKLRVESSSKLWAQCVQLHNGILLAKDTTEAFEKMVSLLSVLLSMQGAVDINKLCEEMLDNRATLQ
UXH97297.1:3856-3938 (4)	nsp7 [polyprotein=ORF1ab polyprotein] [organism=Severe acute respiratory syndrome coronavirus 2] [isolate=SARS-CoV-2/human/USA/WI-UW-9773/2022]	SKMSDVKXXXXXXXXXXXXXXXXXXXXXXXXXXXXXXXXXXXXXXXXXXXXXXXXXXXXXXXXXXXXXXXXXXXXXXXXXXXX
UAQ15054.1:3844-3926 (4)	nsp7 [polyprotein=ORF1ab polyprotein] [organism=Severe acute respiratory syndrome coronavirus 2] [isolate=SARS-CoV-2/human/USA/UT-UPHL-210902649940/2021]	SKMSDVKCTSVVLLSVLQQLRVESSSKLWAQCVQLHXXXXXXXXXXXXXXXXXXXLSVXXXXXXXXXXXXXXXXXXXXXXXXX
UIN99542.1:3859-3941 (4)	nsp7 [polyprotein=ORF1ab polyprotein] [organism=Severe acute respiratory syndrome coronavirus 2] [isolate=SARS-CoV-2/human/USA/GA-CDC-ASC210642530/2021]	SKMSDXKCTSXXLLSVLQQLRVESSSKLWAQCVQLHNDILLAKDTTEAFEKMVSLLSVLLSMQGAVDINKLCEEMLDNRATLQ
UDN64895.1:3860-3942 (4)	nsp7 [polyprotein=ORF1a polyprotein] [organism=Severe acute respiratory syndrome coronavirus 2] [isolate=SARS-CoV-2/human/USA/MD-MDH-5452/2021]	XXXSDVKXTSVVLLSVLQQLRVESSSKLWAQCVQLHNDILLAKDTTEAFEKMVSLLSVLLSMQGAVDINKLCEEMLDNRATLQ
UST50872.1:3860-3942 (4)	nsp7 [polyprotein=ORF1ab polyprotein] [organism=Severe acute respiratory syndrome coronavirus 2] [isolate=SARS-CoV-2/human/USA/TG1298140/2020]	SKMSDVKCTSVVLLSXXXXXXXXXXXXXXXXXXXLHNDILLAKDTTEAFEKMVSLLSVLLSMQGAVDINKLCEEMLDNRATLQ
UYW61903.1:3860-3942 (4)	nsp7 [polyprotein=ORF1ab polyprotein] [organism=Severe acute respiratory syndrome coronavirus 2] [isolate=SARS-CoV-2/human/USA/wi_immunocompromised_host_isolate7/2021]	SKMSDVKCTSVVLLSVXXXXXXXXXSKLWAQCVQLHNDILLAKDTTEAFEKMVSLLSVLLSMQGAVDINKLCEEMLDNRATLQ
UBI47654.1:3860-3942 (4)	nsp7 [polyprotein=ORF1ab polyprotein] [organism=Severe acute respiratory syndrome coronavirus 2] [isolate=SARS-CoV-2/human/USA/UT-UPHL-210921531753/2021]	XXXXXXXXXSVVXXXXLQQLRVESSSKLWAQCVQLHNDILLAKDTTEAFEKMVSLLSVLLSMQGAVDINKLCEEMLDNRATLQ
UBT04235.1:3857-3939 (4)	nsp7 [polyprotein=ORF1ab polyprotein] [organism=Severe acute respiratory syndrome coronavirus 2] [isolate=SARS-CoV-2/human/USA/SC-COVID21-3545/2021]	XXXXXXXXXXXXXXXXXXXXXXXXXXXLWAQCVQLHNDILLAKDTTEAFEKMVSLLSVLLSMQGAVDINKLCEEMLDNRATLQ
UFY55373.1:3860-3942 (4)	nsp7 [polyprotein=ORF1ab polyprotein] [organism=Severe acute respiratory syndrome coronavirus 2] [isolate=SARS-CoV-2/human/USA/IL-CDC-ASC210423978/2021]	SKMSDVKCTSXVLLSVLQQLRVESSSKLWAQCVQLHNDILLAKDTTEAFEKMVSLLSVLLSMQGAVDINKLCEEMLDNRATXX
QWX80616.1:3860-3942 (4)	nsp7 [polyprotein=ORF1ab polyprotein] [organism=Severe acute respiratory syndrome coronavirus 2] [isolate=SARS-CoV-2/human/USA/UT-UPHL-2105562210/2021]	XXXXXXXXXSVVLLSVLQQLRVESSSKLWAQCVQLHNDILLAKDTTEAFEKMVSLLSVLLSMQGAVDINKLCEEILDNRATLQ
UOL19701.1:3856-3938 (4)	nsp7 [polyprotein=ORF1ab polyprotein] [organism=Severe acute respiratory syndrome coronavirus 2] [isolate=SARS-CoV-2/human/USA/UT-UPHL-220326415316/2022]	SKMSDVKCTSVVLLSVLQQLRVESSSKWWAQCVQLHNDILLAKDTTEAFEKMVSLLSVLLSMQGAVDINKLCEEMLDNRATLQ
WEU91654.1:3860-3942 (4)	nsp7 [polyprotein=ORF1ab polyprotein] [organism=Severe acute respiratory syndrome coronavirus 2] [isolate=SARS-CoV-2/human/USA/UW20121529539/2020]	SKMSDVKCTSVVLLSVLQQLRVESSFKLWAQCVQLHNDILLAKDTTEAFEKMVSLLSVLLSMQGAVDISKLCEEMLDNRATLQ
QTC78929.1:3860-3942 (4)	nsp7 [polyprotein=ORF1ab polyprotein] [organism=Severe acute respiratory syndrome coronavirus 2] [isolate=SARS-CoV-2/human/USA/AZ-CDC-STM-000020477/2021]	SKMSDVKCTSVVLLSVLQQLRVESSSKLWAQCVQLHSDILLAKDTTEAFEKMVSLLSVLLSMQGAVDINKLCEEMLDNRATLQ
UPC60151.1:3834-3916 (4)	nsp7 [polyprotein=ORF1ab polyprotein] [organism=Severe acute respiratory syndrome coronavirus 2] [isolate=SARS-CoV-2/human/FRA/IHUCOVID-023506_Nova1/2021]	XXXXXXXXXXXXXXXXLQQLRVESSSKLWAQCVQLHNDILLAKDTTEAFGKMVSLLSVLLSMQGAVDINKLCEEMLDNRATLQ
UDO52290.1:3860-3942 (4)	nsp7 [polyprotein=ORF1ab polyprotein] [organism=Severe acute respiratory syndrome coronavirus 2] [isolate=SARS-CoV-2/human/USA/CA-CDPH-3000223921/2021]	SKMSDVKCTSVXXLXXLQQLRVESSSKLWAQCVQLHNDILLAKDTTEAFEKMVSLLSVLLSMQGAVDINKLCEEMLDNRATLQ
UDY41439.1:3860-3942 (4)	nsp7 [polyprotein=ORF1ab polyprotein] [organism=Severe acute respiratory syndrome coronavirus 2] [isolate=SARS-CoV-2/human/USA/OKPHLCOV0000361/2021]	XXXXXXXXXXXXXLSXLQQLRVESSSKLWAQCVQLHNDILLAKDTTEAFEKMVSLLSVLLSMQGAVDINKLCEEMLDNRATLQ
UFO25009.1:3860-3942 (4)	nsp7 [polyprotein=ORF1ab polyprotein] [organism=Severe acute respiratory syndrome coronavirus 2] [isolate=SARS-CoV-2/human/USA/CO-CDC-MMB11350077/2021]	SKMSGVKCTSVVLLSVLQQLRVESSSKLWAQCVQLHNDILLAKDTTEAFEKMVSLLSVLLSMQGAVDINKLCEEMLDSRATLQ
UDG36181.1:3860-3942 (4)	nsp7 [polyprotein=ORF1ab polyprotein] [organism=Severe acute respiratory syndrome coronavirus 2] [isolate=SARS-CoV-2/human/USA/GA-CDC-ASC210079598/2021]	SKMSDVKCTSVVLLSVLQQLRVESSSKLWAQCVQLHNDILLAKXTTEAFEKMVSLLSVLLSMQGAVDINKLCEEMLDNRATXX
WBE71067.1:3830-3912 (4)	nsp7 [polyprotein=ORF1a polyprotein] [organism=Severe acute respiratory syndrome coronavirus 2] [isolate=SARS-CoV-2/human/USA/CO-CDPHE-2103725861/2022]	XXXXXXXXXXXXXXXXXXXXXXXXXXXXXXXXXXXXXXXXXAKDTTEAFEKMVSLLSVLLSMQGAVDINKLCDEMLDNRATLQ
WEP66828.1:3721-3803 (4)	nsp7 [polyprotein=ORF1ab polyprotein] [organism=Severe acute respiratory syndrome coronavirus 2] [isolate=SARS-CoV-2/human/USA/PR-CVL-001692/2022]	SKMSDVKCTSVVLLSVLQQLRVESXXXXXXXXXXXXXXXXXXXXXXXXXXXXXXXXXXXXXMQGAVDINKLCEEMLDNRATLQ
UCM10941.1:3859-3941 (4)	nsp7 [polyprotein=ORF1ab polyprotein] [organism=Severe acute respiratory syndrome coronavirus 2] [isolate=SARS-CoV-2/human/USA/CA-CDC-FG-140733/2021]	SKMSDVKCTSVVLLSVLQQLRVESSSKLWAQCVQLHNDILLAKDTTEAFEKMVSLLSLLLSMQGAVDINKLCEEMLDNRATLQ
QNL13140.1:3860-3942 (4)	nsp7 [polyprotein=ORF1ab polyprotein] [organism=Severe acute respiratory syndrome coronavirus 2] [isolate=SARS-CoV-2/human/USA/WI-UW-1181/2020]	SKMSDVKCTSVVLLSVLQQLRVESLSKLWAQCVQLHNDILLAKDTTEAFXKMVSLLSVLLSMQGAVDINKLCEEMLDNRATLQ
UDG38608.1:3860-3942 (4)	nsp7 [polyprotein=ORF1ab polyprotein] [organism=Severe acute respiratory syndrome coronavirus 2] [isolate=SARS-CoV-2/human/USA/FL-CDC-ASC210138348/2021]	SKMSDVKCTSVVLLSVLQQLXXESSSKLWAQCVQLHNDILLAKDXXEAFEKMVSLLSVLLSMQGAVDINKLCEEMLDNRATLQ
WAA70256.1:3860-3942 (4)	nsp7 [polyprotein=ORF1ab polyprotein] [organism=Severe acute respiratory syndrome coronavirus 2] [isolate=SARS-CoV-2/H.sapiens/USA/TB-90006186/2021]	XXXXXXXXXSVVLLSVXXXXXXXXXXXXXXXXXXXXXXXXXXXXXXXXXXXXXXXXXXXXXXXXXXXXXXXXXXXXXXXXXXX
UCO38305.1:3860-3942 (4)	nsp7 [polyprotein=ORF1a polyprotein] [organism=Severe acute respiratory syndrome coronavirus 2] [isolate=SARS-CoV-2/human/USA/FL-CDC-ASC210141656/2021]	SKMSDVKCTSVVLLSVLQQLXVESSSKLWAQCVQLHNDILLAXXXXXXFEKMVSLLSVLLSMQGAVDINKLCEEMLDNRAXXX
UGN92398.1:3860-3942 (4)	nsp7 [polyprotein=ORF1ab polyprotein] [organism=Severe acute respiratory syndrome coronavirus 2] [isolate=SARS-CoV-2/human/USA/VT-CDCBI-CRSP_ZZZ3L6HDWZOIWIVO/2021]	XXXSDVKCTSVVLLSVLQQLRVESSSKSWAQCVQLHNDILLAKDTTEAFEKMVSLLSVLLSMQGAVDINKLCEEMLDNRATLQ
UCN25137.1:3860-3942 (4)	nsp7 [polyprotein=ORF1a polyprotein] [organism=Severe acute respiratory syndrome coronavirus 2] [isolate=SARS-CoV-2/human/USA/NV-NSPHL-399350/2021]	XXXXDVKCTSVVLLXXLQQLRVESSSKLWAQCVQLHNDILLAKDTTEAFEKMVSLLSVLLSMQGAVDINKLCEEMLDNRATLQ
UKJ86681.1:3834-3916 (4)	nsp7 [polyprotein=ORF1ab polyprotein] [organism=Severe acute respiratory syndrome coronavirus 2] [isolate=SARS-CoV-2/human/USA/WA-S17435/2022]	SKMSDVKCTSVVXXXXXXXXXXXXXXXXXXXXXXLHNDILLAKDTTEAFEKMVSLLSVLLSMQGAVDINKLCEEMLDNRATLQ
QZQ70980.1:3860-3942 (4)	nsp7 [polyprotein=ORF1ab polyprotein] [organism=Severe acute respiratory syndrome coronavirus 2] [isolate=SARS-CoV-2/human/USA/MA-CDCBI-CRSP_HQWIV6ZQG2X4IBNV/2021]	XKXXXXXCTSVVLLSVLQQLRVESSSKLWAQCVQLHNDILLAKDTTEAFEKMVSLLSVLLSMQGAVDINKLCEEMLDNRATLQ
UPY66685.1:3857-3939 (4)	nsp7 [polyprotein=ORF1ab polyprotein] [organism=Severe acute respiratory syndrome coronavirus 2] [isolate=SARS-CoV-2/human/USA/TG1222034/2022]	SXXSDVXCTSVVLLSVLQQLRVESSSKLWAQCVQLHNDILLAKDTTEAFEKMVSLLSVLLSMQGAVDINKLCEEMLDNRATLQ
UQG78870.1:3839-3921 (4)	nsp7 [polyprotein=ORF1ab polyprotein] [organism=Severe acute respiratory syndrome coronavirus 2] [isolate=SARS-CoV-2/human/USA/TG1003758/2021]	XXXXXXXXTXXXXXXXXXXXXXXXXXXXXXXXXXXHNDILLAKDTTEAFEKMVSLLSVLLSMQGAVDINKLCEEMLDNRATLQ
UMG10720.1:3860-3942 (4)	nsp7 [polyprotein=ORF1ab polyprotein] [organism=Severe acute respiratory syndrome coronavirus 2] [isolate=SARS-CoV-2/human/IND/INSACOG-GBRC1435/2021]	SKMSDVKCTSVVLLSVLQQLRVESSSKLWAQCVQLHNDILLAKDTTEAFEKMVSLLSVLLSXXXXXXINKLCEEMLDNRATLQ
UGO30705.1:3860-3942 (4)	nsp7 [polyprotein=ORF1ab polyprotein] [organism=Severe acute respiratory syndrome coronavirus 2] [isolate=SARS-CoV-2/human/USA/MI-MDHHS-SC29080/2021]	SKMSDVKCTSVVLLSVLQQLRVESSSKLWAQCVQLHNDILLAKDTTEAFEKMVSLLSVLLSMQGAVDINNLCEEILDNRATLQ
UIW01104.1:3860-3942 (4)	nsp7 [polyprotein=ORF1a polyprotein] [organism=Severe acute respiratory syndrome coronavirus 2] [isolate=SARS-CoV-2/human/USA/PR-CDC-ASC210559698/2021]	SKMSDVKCTSVVLLSVLQQLRVESSSKLXXQCVQLHNDILLAKDTTEAFEKMVSLLSVLLSMQGAVDINKLCEEMLDNRATXX
UQR47966.1:3857-3939 (4)	nsp7 [polyprotein=ORF1ab polyprotein] [organism=Severe acute respiratory syndrome coronavirus 2] [isolate=SARS-CoV-2/human/USA/TG1183434/2022]	SKXSXXXCTSVVLLSVLQQLRVESSSKLWAQCVQLHNDILLAKDTTEAFEKMVSLLSVLLSMQGAVDINKLCEEMLDNRATLQ
WEX73536.1:3857-3939 (4)	nsp7 [polyprotein=ORF1ab polyprotein] [organism=Severe acute respiratory syndrome coronavirus 2] [isolate=SARS-CoV-2/human/USA/MD-MDH-8622/2023]	XXXXXXXXXSVXXXXXXQQLRVESSSKLWAQCVQLHNDILLAKDTTEAFEKMVSLLSVLLSMQGAVDINKLCEEMLDNRATLQ
UFP07308.1:3860-3942 (4)	nsp7 [polyprotein=ORF1ab polyprotein] [organism=Severe acute respiratory syndrome coronavirus 2] [isolate=SARS-CoV-2/human/USA/SC_1167_T14/2020]	SKMSDVKCTSVVLLSVLQQLRVESSSKLXXXXXXXXXXXXXXXXXXXXFEKMVSLLSVLLSMQGAVDINKLCEEMLDNRATLQ
UGN74938.1:3860-3942 (4)	nsp7 [polyprotein=ORF1ab polyprotein] [organism=Severe acute respiratory syndrome coronavirus 2] [isolate=SARS-CoV-2/human/UZB/UZB-398/2021]	SKMSDVKCTSVVLLSVLQQLRVXXXXXXXXXXXXXXXXXXXXXXXXXXXXKMVSLLSVLLSMQGAVDINKLCEEMLDNRATLQ
UJG83721.1:3856-3938 (4)	nsp7 [polyprotein=ORF1ab polyprotein] [organism=Severe acute respiratory syndrome coronavirus 2] [isolate=SARS-CoV-2/human/USA/NC-CDC-ASC210558140/2021]	SKMSDVKCTSVVLLSVLQQRRVESSSKLWAQCVQLHNDILLAKDTTEAFEKMVSLLSVLLSMQGAVDINKLCEEMLDNRATLQ
QWK75858.1:3860-3942 (4)	nsp7 [polyprotein=ORF1ab polyprotein] [organism=Severe acute respiratory syndrome coronavirus 2] [isolate=SARS-CoV-2/human/USA/WA-UW-67377/2021]	SKMSDVKCTSVVLLSVLQQLRVESSSKLWAQFVQLHNDILLAKDTTEAFEKMVSLLSVLLSMQGAVDINKLCEEMLDNRATLQ
QYB09237.1:3860-3942 (4)	nsp7 [polyprotein=ORF1ab polyprotein] [organism=Severe acute respiratory syndrome coronavirus 2] [isolate=SARS-CoV-2/human/USA/UT-UPHL-210721169867/2021]	XXMXXXKCTSVVLLSVLQQLRVESSSKLWAQCVQLHNDILLAKDTTEAFEKMVSLLSVLLSMQGAVDINKLCEEMLDNRAILQ
UFV14721.1:3860-3942 (4)	nsp7 [polyprotein=ORF1ab polyprotein] [organism=Severe acute respiratory syndrome coronavirus 2] [isolate=SARS-CoV-2/human/USA/IL-CDC-ASC210454492/2021]	SKMSDVKCTSVVLLSVLQQLRVESSSKLWAQCVQLHNDILLAKDTTEAFEKMVSLLSVLLSMQGAVXXNKLCEEMLDXXXXXX
UHY70005.1:3860-3942 (4)	nsp7 [polyprotein=ORF1ab polyprotein] [organism=Severe acute respiratory syndrome coronavirus 2] [isolate=SARS-CoV-2/human/USA/CA-CDPH-3000281705/2021]	XKMXXXXXXXXXXXXXLQQLRVESSSKLWAQCVQLHNDILLAKDTTEAFEKMVSLLSVLLSMQGAVDINKLCEEMLDNRATLQ
UPE78239.1:3857-3939 (4)	nsp7 [polyprotein=ORF1ab polyprotein] [organism=Severe acute respiratory syndrome coronavirus 2] [isolate=SARS-CoV-2/human/FRA/IHUCOVID-005185-N1/2021]	XXXXXXXCTSVVLLSVLQQLRVESSSKLWAQCVQLHNDILLAKDTTEAFEKMVSLLSVLLSMQGAVDINKLCEEMLNNRATLQ
UYE58817.1:3857-3939 (4)	nsp7 [polyprotein=ORF1a polyprotein] [organism=Severe acute respiratory syndrome coronavirus 2] [isolate=SARS-CoV-2/human/NZL/22CV1977/2022]	XXXXXXXXXXXXXXXXXXXXXVESSSKLWAQCVQLHNDILLAKDTTEAFEKMVSLXXXXXXXXXXXXXXXXXXXXXXXXXXXX
QMT94058.1:3860-3942 (4)	nsp7 [polyprotein=ORF1ab polyprotein] [organism=Severe acute respiratory syndrome coronavirus 2] [isolate=SARS-CoV-2/human/USA/WA-S1775/2020]	SKMSDVKCTSVVLLSVLQQLRVESSSKLWAQCVQLHNDILLAKDTTEXXXXXXSLLSVLLSMQGAVDINKLCEEMLDNRATLQ
UDZ98165.1:3860-3942 (4)	nsp7 [polyprotein=ORF1ab polyprotein] [organism=Severe acute respiratory syndrome coronavirus 2] [isolate=SARS-CoV-2/human/USA/AZ-ASU19846/2021]	SKMSDVKCTSVVLLSVLQQLRVESSSKLWAQCVQLHNDILLAKDTTEAFEKMVSLLSVLLSMQGAVDINKLXXXXXXXRATLQ
UPA94978.1:3830-3912 (4)	nsp7 [polyprotein=ORF1ab polyprotein] [organism=Severe acute respiratory syndrome coronavirus 2] [isolate=SARS-CoV-2/human/FRA/IHUCOVID-064078_Nano1/2022]	XXXXXXXXXXXXXXXXXXXXXXXXXXXXXXXXXXXXXXXXXAKDTTEAFEKMVSLLXXXXXXXXXXXXXXXXXXXXXXXXXXX
UOZ74090.1:3835-3917 (4)	nsp7 [polyprotein=ORF1ab polyprotein] [organism=Severe acute respiratory syndrome coronavirus 2] [isolate=SARS-CoV-2/human/USA/MI-CDC-ASC210850661/2022]	SKMSDVKCTSVVLXXXXXXXXXXXXXXXXXXXXXXXNDILLAKDTTEAFEKMVSLLSVLLSMQGAVDINKLCEEMLDNRATLQ
WEP69944.1:3654-3736 (4)	nsp7 [polyprotein=ORF1a polyprotein] [organism=Severe acute respiratory syndrome coronavirus 2] [isolate=SARS-CoV-2/human/USA/PR-CVL-003163/2022]	SKMSDVKCTSVVLLSVLQQLRVESSSKLWAQCVQXXXXXXXXXXXXXXXXXXXXXXSVLLSMQGAVDINKLCEEMLDNRATLQ
QYB10911.1:3860-3942 (4)	nsp7 [polyprotein=ORF1a polyprotein] [organism=Severe acute respiratory syndrome coronavirus 2] [isolate=SARS-CoV-2/human/USA/UT-UPHL-210721492189/2021]	XXXXXXXXXXXXXXXXLQXXXXESSSXXXXXXXXXXXXXXLAKXXXXXXEKMXXXXSVLLSXXXXXXXNKLCEEXLDNRAXXX
UPW40561.1:3860-3942 (4)	nsp7 [polyprotein=ORF1ab polyprotein] [organism=Severe acute respiratory syndrome coronavirus 2] [isolate=SARS-CoV-2/human/USA/SARS00032975/2021]	SKMSDVKCTSVVLLSVLQQLRVESSSKLWAQCVQLHNDILLAKDTTEAFEKMVSLLSVLXXXXXXXXXXXXXXXXXXXXATLQ
UCV48998.1:3860-3942 (4)	nsp7 [polyprotein=ORF1ab polyprotein] [organism=Severe acute respiratory syndrome coronavirus 2] [isolate=SARS-CoV-2/human/USA/IL-CDC-LC0304591/2021]	SKMSDVKCTSVVLLSVLQQLRVESSSKLWAQCVQLHNDILLAKDTTEAFEKMVSLLSVLLSMQGAVDINKLCEEMLDNWATLQ
UZW50103.1:3860-3942 (4)	nsp7 [polyprotein=ORF1a polyprotein] [organism=Severe acute respiratory syndrome coronavirus 2] [isolate=SARS-CoV-2/human/BRA/EPI_ISL_8890150/2021]	XXXXXVXXXSVVLLSVLQQLRVESSSKLWAQCVQLHNDILLAKDTTEAFEKMVSLLSVLLSMQGAVDINKLCEEMLDNRATLQ
UIX60723.1:3860-3942 (4)	nsp7 [polyprotein=ORF1ab polyprotein] [organism=Severe acute respiratory syndrome coronavirus 2] [isolate=SARS-CoV-2/human/BGD/Laila_719/2022]	SKMSDVKCTSVVLLSVLQQLRVESSSKLWAQCVQLHNDILLAKDTTEAFEKMVSLLSVLLSMQGAVDXXXXXXXMLDNRATLQ
UIS92391.1:3860-3942 (4)	nsp7 [polyprotein=ORF1a polyprotein] [organism=Severe acute respiratory syndrome coronavirus 2] [isolate=SARS-CoV-2/human/USA/CA-CDPH-3000021303/2021]	SKMSDVKCTSVVLLXXLQQLRVESSSKLXAQCVQLHNDILLAKDTTEAFEKMVSLLSVLLSMQGAVDINKLCEEMLDNRATLQ
QJR90571.1:3860-3942 (4)	nsp7 [polyprotein=ORF1ab polyprotein] [organism=Severe acute respiratory syndrome coronavirus 2] [isolate=SARS-CoV-2/human/AUS/VIC549/2020]	SKMSDVKCTSVVLLSVLQQLRVESLSKLWAQCVQLHNDILLAKDTTEAFEKMVSLLSVLLSMQGAVXINKLCEEMLDNRATLQ
UQH42454.1:3857-3939 (4)	nsp7 [polyprotein=ORF1ab polyprotein] [organism=Severe acute respiratory syndrome coronavirus 2] [isolate=SARS-CoV-2/human/USA/TG1235786/2022]	XXMXDVKCTSVVLLSVLQQLRVESSSKLWAQCVQLHNDILLAKDTTEAFEKMVSLLSVLLSMQGAVDINKLCEEMLDNRATLQ
UQH43512.1:3857-3939 (4)	nsp7 [polyprotein=ORF1ab polyprotein] [organism=Severe acute respiratory syndrome coronavirus 2] [isolate=SARS-CoV-2/human/USA/TG1228131/2022]	SKMSXVXCTSVVLLSVLQQLRVESSSKLWAQCVQLHNDILLAKDTTEAFEKMVSLLSVLLSMQGAVDINKLCEEMLDNRATLQ
UPE83949.1:3849-3931 (4)	nsp7 [polyprotein=ORF1ab polyprotein] [organism=Severe acute respiratory syndrome coronavirus 2] [isolate=SARS-CoV-2/human/FRA/IHUCOVID-003489_Illu1/2021]	SKMSDVKCTSVVLLSVLQQLRVXXXXXXXXXXXXXXXXXXXXXXXTXXXXXXXXXXXXXXXXQGAVDINKLCEEMLDNRATLQ
UZM02775.1:3857-3939 (4)	nsp7 [polyprotein=ORF1a polyprotein] [organism=Severe acute respiratory syndrome coronavirus 2] [isolate=SARS-CoV-2/human/USA/JCUA262146/2022]	SKMSDVKCTSVVLLSVLXXXXXXXXXXXXXXXXXXHNDILLAKDTTEAFEKMVSLLSVLLSMQGAVDINKLCEEMLDNRATLQ
UFD40338.1:3860-3942 (4)	nsp7 [polyprotein=ORF1ab polyprotein] [organism=Severe acute respiratory syndrome coronavirus 2] [isolate=SARS-CoV-2/human/USA/CA-CDC-ASC210446507/2021]	SKMSDVKCTSVVLLSVLQQLRVESSSKLWAQCVQLHNDILLAKDTTEAFEKMVSLLSVLLSMQGAVXINKLCEEMLDNXXXXX
UPE91987.1:3860-3942 (4)	nsp7 [polyprotein=ORF1ab polyprotein] [organism=Severe acute respiratory syndrome coronavirus 2] [isolate=SARS-CoV-2/human/FRA/IHUCOVID-002000/2020]	SXXXXXXXXXXXXXXXXXXXXXXXXXXXXXXXXXXXXXXXXXXDTTEAFEKMVSLLSVLLSMQGAVDINKLCEEMLDNRATLQ
WEP67981.1:3721-3803 (4)	nsp7 [polyprotein=ORF1a polyprotein] [organism=Severe acute respiratory syndrome coronavirus 2] [isolate=SARS-CoV-2/human/USA/PR-CVL-002931/2022]	SKMSDVKCTSVVLLSVLQQLRVESSSKLWAQCVQXXXXXXXXXXXXXXXXXXXXXXXXXXSMQGAVDINKLCEEMLDNRATLQ
WEP68295.1:3712-3794 (4)	nsp7 [polyprotein=ORF1a polyprotein] [organism=Severe acute respiratory syndrome coronavirus 2] [isolate=SARS-CoV-2/human/USA/PR-CVL-002961/2022]	SKMSDVKCTSVVLLSVLQQLRVESSSKLWAQCVQXXXXXXXXXXTTEAFEKMVSLLSVLLSMQGAVDINKLCEEMLDNRATLQ
UCT82226.1:3858-3940 (4)	nsp7 [polyprotein=ORF1a polyprotein] [organism=Severe acute respiratory syndrome coronavirus 2] [isolate=SARS-CoV-2/human/USA/CA-CDC-ASC210409317/2021]	SKMSDVKCTSVVLLSVLQQLRVESSSKLWAQCVQLHNDILLAKXXXEAFEKMVSLLSVLLSMQGAVDINKLCEEMLDNRATXX
UYB10390.1:3736-3818 (4)	nsp7 [polyprotein=ORF1ab polyprotein] [organism=Severe acute respiratory syndrome coronavirus 2] [isolate=SARS-CoV-2/human/USA/NY-CUIMC-NP-11452/2022]	SKMSDVKCTSVVLLSVLQQLRVESSSKLWAQCVQLHNDILLAKDTTEAFEKMVSLXXXXXXXXXXXXXXKLCEEMLDNRATLQ
ULU59356.1:3856-3938 (4)	nsp7 [polyprotein=ORF1ab polyprotein] [organism=Severe acute respiratory syndrome coronavirus 2] [isolate=SARS-CoV-2/human/USA/B013594/2021]	SKMSDVKCTSVVLLXXXXXXXXESSSKLWAQCVQLHNDILLAKDTTEAFEKMVSLLSVLLSMQGAVDINKLCEEMLDNRATLQ
UIK32769.1:3860-3942 (4)	nsp7 [polyprotein=ORF1ab polyprotein] [organism=Severe acute respiratory syndrome coronavirus 2] [isolate=SARS-CoV-2/human/USA/VA-CDC-MMB12165833/2021]	SKMSDVKCTSVVLLSVLQQLRVESSSKLWAQCVQLHNDILLAKDTTEAFEKXXXXXXXXXXXXXXXXXXKLCEEILDNRATLQ
QZI32965.1:3859-3941 (4)	nsp7 [polyprotein=ORF1ab polyprotein] [organism=Severe acute respiratory syndrome coronavirus 2] [isolate=SARS-CoV-2/human/USA/CA-CDC-FG-076850/2021]	SKMSDVKCTSVVLLSGLQQLRVESSSKLWAQCVQLHNDILLAKDTTEAFEKMVSLLSVLLSMQGAVDINKLCEEMLDNRATLQ
UQH46112.1:3860-3942 (4)	nsp7 [polyprotein=ORF1ab polyprotein] [organism=Severe acute respiratory syndrome coronavirus 2] [isolate=SARS-CoV-2/human/USA/TG1243458/2022]	XXXXXXXXXXXXXXXXXXXXXXXXXXXXXXXCXQLHNDILLAKDTTEAFEKMVSLLSVLLSMQGAVDINKLCEEMLDNRATLQ
UES90519.1:3860-3942 (4)	nsp7 [polyprotein=ORF1ab polyprotein] [organism=Severe acute respiratory syndrome coronavirus 2] [isolate=SARS-CoV-2/human/USA/AZ-CDC-ASC210444821/2021]	SKMSDVKCTSVVLLSVLQQLRVESSSKLWAQCVQLHNDILXXXXTTEAFEKMVSLLSVLLSMQGAVDINKLCEEMLDNRATLQ
UTV66851.1:3857-3939 (4)	nsp7 [polyprotein=ORF1ab polyprotein] [organism=Severe acute respiratory syndrome coronavirus 2] [isolate=SARS-CoV-2/human/USA/RI-CDCBI-RIDOH_QRZZFEQVVIGWWTLY/2022]	XXXSDVKCTSVVLLSVLQQLRVESSSKLWAQCIQLHNDILLAKDTTEAFEKMVSLLSVLLSMQGAVDINKLCEEMLDNRATLQ
UQD12203.1:3833-3915 (4)	nsp7 [polyprotein=ORF1a polyprotein] [organism=Severe acute respiratory syndrome coronavirus 2] [isolate=SARS-CoV-2/human/FRA/IHUCOVID-066676_Nova1/2022]	XXXXXVKCTXXXXXXXXXXXXXXXXXXXXXXXXXXXXXXXXAKDTTEAFEKMVSLLSVLLSMQGAVDINKLCEEMLDNRATLQ
UNO52337.1:3830-3912 (4)	nsp7 [polyprotein=ORF1ab polyprotein] [organism=Severe acute respiratory syndrome coronavirus 2] [isolate=SARS-CoV-2/human/USA/FL-BPHL-3867/2022]	XXXXXXXXXXXVLXXXXXXXXXXXXXXXXXXXXXXXXXXXXAKDTTEAFEKMVSLLSVLLSMQGAVDINKLCEEMLDNRATLQ
UEW64862.1:3764-3846 (4)	nsp7 [polyprotein=ORF1a polyprotein] [organism=Severe acute respiratory syndrome coronavirus 2] [isolate=SARS-CoV-2/human/USA/KY-GD_00396/2021]	SKMSDVKCTSVVLLSVLQQLRVXXXXKLWAQCVQLHNDILLAKDTTEAFEKMVSLLSVLLSMQGAVDINKLCEEMLDNRATLQ
ULD55285.1:3860-3942 (4)	nsp7 [polyprotein=ORF1ab polyprotein] [organism=Severe acute respiratory syndrome coronavirus 2] [isolate=SARS-CoV-2/human/BGD/Laila_748/2021]	SKMSDVKCTSVVLLSVLQQLRVESSSKLWAQCVQLHNDILLAKDTTEAFEKMVSLLSVLLSMQGAVXXXXXXXXXXXXXXXLQ
UGX51445.1:3860-3942 (4)	nsp7 [polyprotein=ORF1a polyprotein] [organism=Severe acute respiratory syndrome coronavirus 2] [isolate=SARS-CoV-2/human/USA/MA-CDC-ASC210714468/2021]	SKMSDVKCTSVVLLSVLQQLRVESSSKLWAQCVQLXXXILLAKDTTEAFEKMVSLLSVLLSMQGAVDINKLCEEMLDNRATLQ
UIS91981.1:3860-3942 (4)	nsp7 [polyprotein=ORF1a polyprotein] [organism=Severe acute respiratory syndrome coronavirus 2] [isolate=SARS-CoV-2/human/USA/CA-CDPH-3000015369/2021]	SKMSDVKCTSVXXXXXLQQLRVESSSKLXAQCVQLHNDILLAKDTTEAFEKMVSLLSVLLSMQGAVDINKLCEEMLDNRATLQ
WFK57513.1:3830-3912 (4)	nsp7 [polyprotein=ORF1ab polyprotein] [organism=Severe acute respiratory syndrome coronavirus 2] [isolate=SARS-CoV-2/human/USA/WA-PHL-026499/2022]	SKMSDVKCTSVVLXXXXXXXXVXXXXXXXXXXXXXXXXXXXAKDTTEAFEKMVSLLSVLLSMQGAVDINKLCEEMLDNRATLQ
UJX35601.1:3860-3942 (4)	nsp7 [polyprotein=ORF1ab polyprotein] [organism=Severe acute respiratory syndrome coronavirus 2] [isolate=SARS-CoV-2/human/USA/MP-CDC-2-5441861/2021]	SKMSDVKCTSVVLLSVLQQLRVESSSKLWAQCVQLHNDILLAKDTTEAFEKMVSLLSVLLSMQGAVDINKLCEEMLDBRATLQ
UTQ23527.1:3857-3939 (4)	nsp7 [polyprotein=ORF1ab polyprotein] [organism=Severe acute respiratory syndrome coronavirus 2] [isolate=SARS-CoV-2/Odocoileus virginianus/USA/164730/2021]	SKMSDVKCTSVVLLSVLQQLRVESSSKLWAQCVQLXXXXXXAKDTTEAFXKMVSLLSVLLSMQGAVDINKLCEEMLDNRATLQ
UCR40115.1:3860-3942 (4)	nsp7 [polyprotein=ORF1ab polyprotein] [organism=Severe acute respiratory syndrome coronavirus 2] [isolate=SARS-CoV-2/human/USA/FL-CDC-ASC210083771/2021]	SKMSDVKCTSVVLLSVLQQLRVESSSKLWAQCVQLHNDILXXXDTTEAFEKMVSLLSVLLSMQGAVDINKLCEEMLDNRXTXQ
UWP29299.1:3830-3912 (4)	nsp7 [polyprotein=ORF1ab polyprotein] [organism=Severe acute respiratory syndrome coronavirus 2] [isolate=SARS-CoV-2/human/USA/FL-BPHL-13083/2022]	SKMSDVKCTSVVLLSVLQQLRVEXXXXXXAQCVQLHNDILLAKDTTEAFEKMVSLLSVLLSMQGAVDINKLCEEMLDNRATLQ
WCF75718.1:3857-3939 (4)	nsp7 [polyprotein=ORF1ab polyprotein] [organism=Severe acute respiratory syndrome coronavirus 2] [isolate=SARS-CoV-2/human/USA/JW9017/2023]	XXXXXXXXXXXXXXXXXXXXXXXXXXXXXXXXXXXXXXXXXXXXXXXXFEKMVSLLSVLLSMQGAVDINKLCEEMLDNRATLQ
UOH29028.1:3860-3942 (4)	nsp7 [polyprotein=ORF1ab polyprotein] [organism=Severe acute respiratory syndrome coronavirus 2] [isolate=SARS-CoV-2/human/USA/SD-INBRE-02173/2020]	SKMSDVKCTSVVLLSVLQQLRVESSSKLWAQCVQLHNDILLAKDTTEAFEKMVSLLSVXXXMQGAVDINKLCEEMLDNRATLQ
UCO31188.1:3860-3942 (4)	nsp7 [polyprotein=ORF1ab polyprotein] [organism=Severe acute respiratory syndrome coronavirus 2] [isolate=SARS-CoV-2/human/USA/NC-CDC-ASC210140220/2021]	SKISDVKCTSVVLLSVLQQLRVESSSKLWAQCVQLHNDILLAKDTTEAFEKMVSLLSVLLSMQGAVDINKLCEEMLDNRATXQ
UFJ28581.1:3860-3942 (4)	nsp7 [polyprotein=ORF1ab polyprotein] [organism=Severe acute respiratory syndrome coronavirus 2] [isolate=SARS-CoV-2/human/USA/CO-CDC-MMB11235659/2021]	SKMSDVKCTSVVLLSVLQQLRVESSSKLWXXCVQLHNDILLAKDTTEAFEKMVSLLSVLLSMQGAVDINKLCEEMLDNRATLQ
UQH44117.1:3860-3942 (4)	nsp7 [polyprotein=ORF1ab polyprotein] [organism=Severe acute respiratory syndrome coronavirus 2] [isolate=SARS-CoV-2/human/USA/TG1118426/2021]	XXXXXXXXXXXXXXXXXXXXXXXXXXXXWXXCVQLHNDILLAKDTTEAFEKMVSLLSVLLSMQGAVDINKLCEEMLDNRATLQ
UWW87730.1:3857-3939 (4)	nsp7 [polyprotein=ORF1ab polyprotein] [organism=Severe acute respiratory syndrome coronavirus 2] [isolate=SARS-CoV-2/human/USA/IL-CDC-STM-MJUZ5VGAD/2022]	SKMSDVKCTSVVLLSVLQQLRVESSSKLWAQCVQLHNDILLAKDTTEAFEKMVSLLSVLLSMRGAVDTNKLCEEMLDNRATLQ
UNP57883.1:3857-3939 (4)	nsp7 [polyprotein=ORF1ab polyprotein] [organism=Severe acute respiratory syndrome coronavirus 2] [isolate=SARS-CoV-2/human/USA/FL-BPHL-4139/2022]	SKMSDVKCTSVVLLSVLQQLRVESSSKLWAQCVQLHNDILLAKDTTEAFEKMVSLLXXXXSMQGAVDINKLCEEMLDNRATLQ
WBU80246.1:3834-3916 (4)	nsp7 [polyprotein=ORF1a polyprotein] [organism=Severe acute respiratory syndrome coronavirus 2] [isolate=SARS-CoV-2/human/PRI/PR-UPRRP-7019/2022]	XXMSDVKXXSVVLLSVLQQLRVESSSKLWAQCVQLHNDILLAKDTTEAFEKMVSLLSVLLSMQGAVDINKLCEEMLDNRATLQ
UJD38638.1:3859-3941 (4)	nsp7 [polyprotein=ORF1a polyprotein] [organism=Severe acute respiratory syndrome coronavirus 2] [isolate=SARS-CoV-2/human/USA/MN-CDC-IBX879996615714/2021]	SKMSDVKCTSVVLLSVLQQLRVESSSKLWAQCVQLHNDILLAKDTTEAFEKMVSLLSVXXXXXXXXXXXXXXXEMLDNRATLQ
URZ23553.1:3833-3915 (4)	nsp7 [polyprotein=ORF1ab polyprotein] [organism=Severe acute respiratory syndrome coronavirus 2] [isolate=SARS-CoV-2/human/USA/FL-BPHL-8875/2022]	SKMSDVKCTSVVLLSVLQQLRVXXXXXXXXXXVXXXXXXXXAKDTTEAFEKMVSLLSVLLSMQGAVDINKLCEEMLDNRATLQ
UPY60948.1:3860-3942 (4)	nsp7 [polyprotein=ORF1ab polyprotein] [organism=Severe acute respiratory syndrome coronavirus 2] [isolate=SARS-CoV-2/human/USA/TG1192175/2021]	XKXXXXXXXXXXXXXXXXXXXXXXXXXXXXXXVQLHNDILLAKDTTEAFEKMVSLLSVLLSMQGAVDINKLCEEMLDNRATLQ
UNI86031.1:3856-3938 (4)	nsp7 [polyprotein=ORF1ab polyprotein] [organism=Severe acute respiratory syndrome coronavirus 2] [isolate=SARS-CoV-2/human/USA/OH-UHTL-2080/2022]	SKMSDVKCTSVVLLSVLQQLRVESSSKLWAQCVQLHNDILLAKDTTDAFEKMVSLFSVLLSMQGAVDINKLCEEMLDNRATLQ
UST52075.1:3835-3917 (4)	nsp7 [polyprotein=ORF1ab polyprotein] [organism=Severe acute respiratory syndrome coronavirus 2] [isolate=SARS-CoV-2/human/USA/TG1346366/2022]	XXXXXXXXTSVXLLSVLQQLRVESSSKLWAQCVQLHNDILLAKDTTEAFEKMVSLLSVLLSMQGAVDINKLCEEMLDNRATLQ
UDG28387.1:3860-3942 (4)	nsp7 [polyprotein=ORF1ab polyprotein] [organism=Severe acute respiratory syndrome coronavirus 2] [isolate=SARS-CoV-2/human/USA/WV-CDC-ASC210138671/2021]	SKMSDVKCTSVVLLSVLQQLRVESSSKLWAQCVQLHNDILLAKDTTEAFEKMVSLLSVLLSMQGAVDINKLCEEMLXXRATXX
UAB65357.1:3860-3942 (4)	nsp7 [polyprotein=ORF1ab polyprotein] [organism=Severe acute respiratory syndrome coronavirus 2] [isolate=SARS-CoV-2/human/USA/MS-CDC-ASC210246650/2021]	SKMSDVKCTSVVLLSVLQQLRVESSSKLWAQCVQLHNDILLAKDTTEAFEKMVSLLSVLLSMQGAVXXXXXCEEMLXXXXXXX
UPC89881.1:3836-3918 (4)	nsp7 [polyprotein=ORF1ab polyprotein] [organism=Severe acute respiratory syndrome coronavirus 2] [isolate=SARS-CoV-2/human/FRA/IHUCOVID-016086-NovaE1/2020]	XXXXXXXXXSVVLLSVLQQLRVESSSILWAQCVQLHNDILLAKDTTEAFEKMVSLLSVLLSMQGAVDINKLCEEMLDNRATLQ
UCB84457.1:3860-3942 (4)	nsp7 [polyprotein=ORF1a polyprotein] [organism=Severe acute respiratory syndrome coronavirus 2] [isolate=SARS-CoV-2/human/USA/MI-CDC-ASC210174524/2021]	SKMSDVKCTSVVLLSVLQQLRVESSSKLWAQCVQLHNDILLAXXXXEAFEKMVSLLSVLLSMQGAVDINKLCEEMLDNRATXX
UTH40713.1:3830-3912 (4)	nsp7 [polyprotein=ORF1ab polyprotein] [organism=Severe acute respiratory syndrome coronavirus 2] [isolate=SARS-CoV-2/human/USA/FL-BPHL-10394/2022]	XXXXXXXXTSVXXXXXXXXXXXXXXXXXXXXXXXXXXXXXXAKDTTEAFEKMVSLLSVLLSMQGAVDINKLCEEMLDNRATLQ
WAP39404.1:3569-3651 (4)	nsp7 [polyprotein=ORF1ab polyprotein] [organism=Severe acute respiratory syndrome coronavirus 2] [isolate=SARS-CoV-2/human/LAO/LOMWRU-0581/2022]	SKMSDVKCXXXXXXXXXXXXXXXXXXXXXXXXXXXXXXXXXXXXXXXXXXXXXXXXXXXXXXXXXXXXXXXXXXXXXXXXXXX
WEP66795.1:3731-3813 (4)	nsp7 [polyprotein=ORF1ab polyprotein] [organism=Severe acute respiratory syndrome coronavirus 2] [isolate=SARS-CoV-2/human/USA/PR-CVL-001686/2022]	SKMSDVKCTSVVLLSVLQQLRVESSSKLWAQXXXXXXXXXXXKDTTEAFEKMVSLLSVLLSMQGAVDINKLCEEMLDNRATLQ
UCR21505.1:3860-3942 (4)	nsp7 [polyprotein=ORF1a polyprotein] [organism=Severe acute respiratory syndrome coronavirus 2] [isolate=SARS-CoV-2/human/USA/SC-CDC-ASC210131515/2021]	SKMSDVKCTSVVLLSVLQQLRVESSSKLWAQCVQLHNDXLLAKDTTEAFEKMVSLLSVLLSMQGAVDINKLCEEMLDNRAXXQ
ULL36638.1:3860-3942 (4)	nsp7 [polyprotein=ORF1ab polyprotein] [organism=Severe acute respiratory syndrome coronavirus 2] [isolate=SARS-CoV-2/human/SouthAfrica/NHLS-UCT-GS-F986/2021]	SKMSDIKCTSVVLLSVLQQLRVESSSKLWAQCVQLHNDILLAKDTTEAFEKMVSLLSVLLSMQGAVDINKLCEEMLNNRATLQ
UDE17701.1:3860-3942 (4)	nsp7 [polyprotein=ORF1ab polyprotein] [organism=Severe acute respiratory syndrome coronavirus 2] [isolate=SARS-CoV-2/human/USA/CO-CDPHE-2005080155/2020]	SKXXXXKXXXXXXXXXLQQLRVESSSKLWAQCVQLHNDILLAKDTTEAFEKMVSLLSVLLSMQGAVDINKLCEEMLDNRATLQ
UTY91583.1:3857-3939 (4)	nsp7 [polyprotein=ORF1ab polyprotein] [organism=Severe acute respiratory syndrome coronavirus 2] [isolate=SARS-CoV-2/human/USA/VA-CAV_VAS3N_00010703_01/2022]	SKMSDVKCTSVVLLSFLQQLRVESSSKLWAQCVQLHNDILLAKDTTEAFEKMVSLLSVLLSMQGAVDINKLCEEMLDNRATLQ
UGY50668.1:3860-3942 (4)	nsp7 [polyprotein=ORF1ab polyprotein] [organism=Severe acute respiratory syndrome coronavirus 2] [isolate=SARS-CoV-2/human/USA/NC-CORVASEQ-DH-245M1164000003023/2021]	SKMSDVKCTSVVLLSVLQQLRVESSSKLWAQCVQLHNDILLAKDTIEAFEKMVSLLSVLLSMQGAVDINKFCEEMLDNRATLQ
UIB23164.1:3857-3939 (4)	nsp7 [polyprotein=ORF1ab polyprotein] [organism=Severe acute respiratory syndrome coronavirus 2] [isolate=SARS-CoV-2/human/USA/LA-CDC-ASC210632936/2021]	SKMSDVKCTSVXXLSVLQQLRVESSSKLWAQCVQLHNDILLAKDTTEAFEKMVSLLSVLLSMQGAVDINKLCEEMLDNRATLX
WEP67700.1:3569-3651 (4)	nsp7 [polyprotein=ORF1a polyprotein] [organism=Severe acute respiratory syndrome coronavirus 2] [isolate=SARS-CoV-2/human/USA/PR-CVL-002906/2022]	SKMSDVKCTSVVLLSVLQQLRVESSXXXXXXXXXXXXXXXXXXXXXXXXXXMVSLLSVLLSMQGAVDINKLCEEMLDNRATLQ
UQR38536.1:3857-3939 (4)	nsp7 [polyprotein=ORF1ab polyprotein] [organism=Severe acute respiratory syndrome coronavirus 2] [isolate=SARS-CoV-2/human/USA/TG996448/2022]	SXXSXXXCTSVVLLSVLQQLRVESSSKLWAQCVQLHNDILLAKDTTEAFEKMVSLLSVLLSMQGAVDINKLCEEMLDNRATLQ
UGB55273.1:3860-3942 (4)	nsp7 [polyprotein=ORF1ab polyprotein] [organism=Severe acute respiratory syndrome coronavirus 2] [isolate=SARS-CoV-2/human/USA/IL-CDC-ASC210394981/2021]	SKMSXVKCTSVVLLSVLQXXRVESSSKLWAQCVQLHNDILLAKDXTEAFEKMVSLLSVLLSMQGAVDINKLCEEMLDNRATLQ
UYO72094.1:3569-3651 (4)	nsp7 [polyprotein=ORF1a polyprotein] [organism=Severe acute respiratory syndrome coronavirus 2] [isolate=SARS-CoV-2/human/USA/TX-DSHS-23470/2022]	SKMSDVKCASVVLLSVLQQLRVESSSKLWAQCVQLHNDILLAKDTTEAFEKMVSLLSVLLSMQGAVDINKLCEEILDNRATLQ
UBD22776.1:3860-3942 (4)	nsp7 [polyprotein=ORF1ab polyprotein] [organism=Severe acute respiratory syndrome coronavirus 2] [isolate=SARS-CoV-2/human/USA/PR-CDC-ASC210104593/2021]	SKMSDVKCTSVVLLSVLQQLRVESSSKLWAQCVQLHNDILLAKDTXEAFEKMVSLLSVLLSMQGAVDINKLCEEMLDNRATXX
UGW43235.1:3860-3942 (4)	nsp7 [polyprotein=ORF1ab polyprotein] [organism=Severe acute respiratory syndrome coronavirus 2] [isolate=SARS-CoV-2/human/USA/MA-CDCBI-CRSP_6BHEDTWPWAJVDFJF/2021]	SKXSDVKCTSVVLLSVLQQLRVESSSXXXXXXXXXXXXXXXXXXXXXXXXXXXXXXXXXXXXXXXXXXXXXXXXXXXXXXXXX
URF39944.1:3856-3938 (4)	nsp7 [polyprotein=ORF1ab polyprotein] [organism=Severe acute respiratory syndrome coronavirus 2] [isolate=SARS-CoV-2/human/USA/VA-VTVAS3-GSC34139/2022]	SKMSDVKCTXXXXXXXXXXXXXXXXXXXXXXXXXXXXXXXXXXDTTEAFEKMVSLLSVLLSMQGAVDINKLCEEMLDNRATLQ
UOA81319.1:3860-3942 (4)	nsp7 [polyprotein=ORF1a polyprotein] [organism=Severe acute respiratory syndrome coronavirus 2] [isolate=SARS-CoV-2/human/USA/NM-UNM-TRL_4D2021_087/2021]	SKMSDVKCTSVVLLXXXXXXXXXXXXXLWAQCVQLHNDILLAKDTTEAFEKMVSLLSVLLSMQGAVDINKLCEEMLDNRATLQ
UNU47212.1:3836-3918 (4)	nsp7 [polyprotein=ORF1ab polyprotein] [organism=Severe acute respiratory syndrome coronavirus 2] [isolate=SARS-CoV-2/human/USA/IL-CDC-ASC210734623/2022]	SKMSDVKCTSVVLLSVLQQLRVESSSKXXAXCVQLHNDILLAKDTTEAFEKMVSLLSVLLSMQGAVDINKLCEEMLDNRATLQ
UID53576.1:3860-3942 (4)	nsp7 [polyprotein=ORF1ab polyprotein] [organism=Severe acute respiratory syndrome coronavirus 2] [isolate=SARS-CoV-2/human/USA/CA-CDPH-3000123788/2021]	SKMSDVKCTSVVLLSVLQQLRVESSSKLXXXXXXXXXDILLAKDTTEAFEKMVSLLSVLLSMQGAVDINKLCEEMLDNRATLQ
QUB08912.1:3860-3942 (4)	nsp7 [polyprotein=ORF1ab polyprotein] [organism=Severe acute respiratory syndrome coronavirus 2] [isolate=SARS-CoV-2/human/USA/FL-CDC-ASC210014158/2021]	SKMSDVKCTSVVLLSVLQQLRVESSSKLWAQCVQLHNDILLAKDTTEAFEKMVSLLSFLLSMQGAVDINKFCEEMLDNRATLQ
UCB18858.1:3860-3942 (4)	nsp7 [polyprotein=ORF1ab polyprotein] [organism=Severe acute respiratory syndrome coronavirus 2] [isolate=SARS-CoV-2/human/USA/CA-CDC-ASC210178537/2021]	SKMSDVKCTSVVLLSVLQQLRVESSSKLWAQCVQLHNDILLAKDTTEAFEKMVSLLSVLLSVQGAVDINKLCEEMLNNRATLQ
UKT54431.1:3860-3942 (4)	nsp7 [polyprotein=ORF1ab polyprotein] [organism=Severe acute respiratory syndrome coronavirus 2] [isolate=SARS-CoV-2/human/USA/CA-CDPH-3000300782/2022]	SKMSDVKCTSVVLLSVLQQLRVESSSKLXXXXVXXHNDXXXAXXXXXXXXXXXXXXXXXXXXXXXXXXXXXXXXXXXXXXXXX
[truncated: 3,520 more rows]

## Sheet: Nsp8 May 2022
Nsp8 sequences based on May 2022
Name	Description	Sequence
[truncated: 1,583 more rows]

## Sheet: Nsp8 April 2023
Nsp8 sequences based on April 2023
Name	Description	Sequence
[truncated: 14,993 more rows]
