# Supplementary material for: Bio-Chemoinformatics-Driven Analysis of nsp7 and nsp8 Mutations and Their Effects on Viral Replication Protein Complex Stability
Source: Curr Issues Mol Biol. 2024 Mar 18;46(3):2598–619. doi: 10.3390/cimb46030165 (PMC10968879; doi:10.3390/cimb46030165)
Supplement: Supplementary file 1 [file cimb-46-00165-s001.zip › Supplementary Dataset S5. Double mutation analysis for P121X, L122X.xlsx]

## Sheet: Sheet1
Analysis of Double Mutation on nsp8 (B,D chains)
mutations	average_distance	single_predictions	sum_single_predictions	ddmut_prediction	prediction_reverse
B L1054G;D L1335G;B P1053G;D P1334G	33.29	-2.99;-2.09;-2.75;-0.72	-8.55	-4.04	2.67			Note: B P1053X, D P1334X refer to P121X of nsp8
B L1054G;D L1335G;B P1053D;D P1334D	33.29	-3.0;-2.16;-2.7;-0.92	-8.78	-3.98	3.35			Note: B L1054X, D L1335G refer to L121X of nsp8
B L1054G;D L1335G;B P1053T;D P1334T	33.29	-2.99;-2.18;-2.26;-0.7	-8.13	-3.91	2.49
B L1054G;D L1335G;B P1053S;D P1334S	33.29	-2.99;-2.18;-1.66;-0.4	-7.23	-3.82	2.5
B L1054G;D L1335G;B P1053N;D P1334N	33.29	-2.99;-2.16;-2.39;-0.71	-8.25	-3.69	2.08
B L1054G;D L1335G;B P1053M;D P1334M	33.29	-2.99;-2.17;-2.02;-0.33	-7.51	-3.69	2.36
B L1054H;D L1335H;B P1053G;D P1334G	33.29	-1.65;-0.07;-2.86;-0.72	-5.3	-3.47	1.54
B L1054G;D L1335G;B P1053A;D P1334A	33.29	-2.99;-2.18;-1.2;-0.24	-6.61	-3.46	1.74
B L1054A;D L1335A;B P1053G;D P1334G	33.29	-2.36;-1.57;-2.75;-0.72	-7.4	-3.31	2.24
B L1054A;D L1335A;B P1053G;D P1334G	33.29	-2.36;-1.57;-2.75;-0.72	-7.4	-3.31	2.24
B L1054P;D L1335P;B P1053G;D P1334G	33.29	-2.45;-1.65;-2.79;-0.88	-7.77	-3.3	2.15
B L1054G;D L1335G;B P1053K;D P1334K	33.29	-3.0;-2.17;-1.6;-0.47	-7.24	-3.29	2.55
B L1054G;D L1335G;B P1053H;D P1334H	33.29	-2.99;-2.18;-2.17;-1.84	-9.18	-3.26	1.3
B L1054N;D L1335N;B P1053G;D P1334G	33.29	-1.58;-0.97;-2.75;-0.88	-6.18	-3.16	1.27
B L1054N;D L1335N;B P1053G;D P1334G	33.29	-1.58;-0.97;-2.75;-0.88	-6.18	-3.16	1.27
B L1054D;D L1335D;B P1053S;D P1334S	33.29	-2.24;-1.48;-1.8;-0.05	-5.57	-3.11	1.8
B L1054G;D L1335G;B P1053I;D P1334I	33.29	-3.0;-2.2;-1.92;-0.05	-7.17	-3.11	1.98
B L1054G;D L1335G;B P1053V;D P1334V	33.29	-2.99;-2.16;-1.48;-0.44	-7.07	-3.11	1.69
B L1054D;D L1335D;B P1053S;D P1334S	33.29	-2.24;-1.48;-1.8;-0.05	-5.57	-3.11	1.8
B L1054D;D L1335D;B P1053G;D P1334G	33.29	-2.17;-1.39;-2.75;-0.72	-7.03	-3.09	2.04
B L1054D;D L1335D;B P1053G;D P1334G	33.29	-2.17;-1.39;-2.75;-0.72	-7.03	-3.09	2.04
B L1054A;D L1335A;B P1053S;D P1334S	33.29	-2.41;-1.57;-1.74;-0.05	-5.77	-3	1.88
B L1054A;D L1335A;B P1053S;D P1334S	33.29	-2.41;-1.57;-1.74;-0.05	-5.77	-3	1.88
B L1054G;D L1335G;B P1053R;D P1334R	33.29	-3.0;-2.09;-2.23;0.27	-7.05	-2.93	0.45
B L1054C;D L1335C;B P1053G;D P1334G	33.29	-1.77;-1.12;-2.75;-0.72	-6.36	-2.92	1.99
B L1054C;D L1335C;B P1053G;D P1334G	33.29	-1.77;-1.12;-2.75;-0.72	-6.36	-2.92	1.99
B L1054C;D L1335C;B P1053S;D P1334S	33.29	-1.73;-1.24;-1.8;-0.05	-4.82	-2.92	1.31
B L1054G;D L1335G;B P1053F;D P1334F	33.29	-2.99;-2.09;-2.3;-0.0	-7.38	-2.91	1.52
B L1054G;D L1335G;B P1053E;D P1334E	33.29	-2.99;-2.09;-2.3;0.95	-6.43	-2.9	1.5
B L1054A;D L1335A;B P1053T;D P1334T	33.29	-2.36;-1.57;-2.26;-0.01	-6.2	-2.86	1.86
B L1054E;D L1335E;B P1053G;D P1334G	33.29	-1.8;-0.91;-2.75;-0.73	-6.19	-2.86	1.52
B L1054A;D L1335A;B P1053T;D P1334T	33.29	-2.36;-1.57;-2.26;-0.01	-6.2	-2.86	1.86
B L1054C;D L1335C;B P1053S;D P1334S	33.29	-1.73;-1.22;-1.8;-0.05	-4.8	-2.84	1.23
B L1054C;D L1335C;B P1053T;D P1334T	33.29	-1.73;-1.22;-2.26;-0.42	-5.63	-2.78	1.48
B L1054C;D L1335C;B P1053T;D P1334T	33.29	-1.73;-1.22;-2.26;-0.42	-5.63	-2.78	1.48
B L1054D;D L1335D;B P1053N;D P1334N	33.29	-2.29;-1.42;-2.21;-0.37	-6.29	-2.76	0.88
B L1054D;D L1335D;B P1053N;D P1334N	33.29	-2.29;-1.42;-2.21;-0.37	-6.29	-2.76	0.88
B L1054D;D L1335D;B P1053H;D P1334H	33.29	-2.34;-1.39;-2.96;-0.92	-7.61	-2.75	0.68
B L1054G;D L1335G;B P1053Q;D P1334Q	33.29	-2.99;-2.18;-0.71;-0.1	-5.98	-2.75	0.97
B L1054D;D L1335D;B P1053H;D P1334H	33.29	-2.34;-1.39;-2.96;-0.92	-7.61	-2.75	0.68
B L1054P;D L1335P;B P1053D;D P1334D	33.29	-2.37;-1.65;-2.29;-0.2	-6.51	-2.74	2.47
B L1054E;D L1335E;B P1053S;D P1334S	33.29	-1.82;-1.03;-1.82;-0.19	-4.86	-2.74	0.89
B L1054G;D L1335G;B P1053L;D P1334L	33.29	-2.98;-2.16;-1.78;-0.21	-7.13	-2.72	0.97
B L1054H;D L1335H;B P1053S;D P1334S	33.29	-1.61;-0.7;-1.74;-0.05	-4.1	-2.72	1.16
B L1054E;D L1335E;B P1053T;D P1334T	33.29	-1.85;-1.03;-2.26;-0.24	-5.38	-2.71	1.05
B L1054Q;D L1335Q;B P1053G;D P1334G	33.29	-0.83;-0.42;-2.89;-0.72	-4.86	-2.7	1.04
B L1054N;D L1335N;B P1053T;D P1334T	33.29	-1.75;-1.01;-2.22;-0.54	-5.52	-2.65	1.03
B L1054H;D L1335H;B P1053N;D P1334N	33.29	-1.51;-0.11;-2.39;-0.39	-4.4	-2.65	0.91
B L1054N;D L1335N;B P1053T;D P1334T	33.29	-1.75;-1.01;-2.22;-0.54	-5.52	-2.65	1.03
B L1054D;D L1335D;B P1053A;D P1334A	33.29	-2.3;-1.39;-1.15;-0.09	-4.93	-2.64	0.81
B L1054D;D L1335D;B P1053A;D P1334A	33.29	-2.3;-1.39;-1.15;-0.09	-4.93	-2.64	0.81
B L1054D;D L1335D;B P1053D;D P1334D	33.29	-2.36;-1.59;-2.43;0.32	-6.06	-2.63	2.29
B L1054D;D L1335D;B P1053D;D P1334D	33.29	-2.36;-1.59;-2.43;0.32	-6.06	-2.63	2.29
B L1054P;D L1335P;B P1053S;D P1334S	33.29	-2.38;-1.48;-1.99;0.06	-5.79	-2.62	0.88
B L1054A;D L1335A;B P1053N;D P1334N	33.29	-2.36;-1.57;-2.15;-0.37	-6.45	-2.61	1.55
B L1054E;D L1335E;B P1053N;D P1334N	33.29	-1.8;-0.97;-1.93;-0.37	-5.07	-2.61	0.4
B L1054A;D L1335A;B P1053N;D P1334N	33.29	-2.36;-1.57;-2.15;-0.37	-6.45	-2.61	1.55
B L1054A;D L1335A;B P1053H;D P1334H	33.29	-2.36;-1.57;-2.12;-0.82	-6.87	-2.58	0.72
B L1054R;D L1335R;B P1053G;D P1334G	33.29	-0.53;-0.05;-2.88;-0.81	-4.27	-2.58	1.15
B L1054A;D L1335A;B P1053H;D P1334H	33.29	-2.36;-1.57;-2.12;-0.82	-6.87	-2.58	0.72
B L1054R;D L1335R;B P1053G;D P1334G	33.29	-0.53;-0.05;-2.88;-0.81	-4.27	-2.58	1.15
B L1054G;D L1335G;B P1053C;D P1334C	33.29	-2.99;-2.09;-1.88;0.02	-6.94	-2.54	1.02
B L1054D;D L1335D;B P1053T;D P1334T	33.29	-2.24;-1.31;-1.73;-0.01	-5.29	-2.49	1.54
B L1054C;D L1335C;B P1053A;D P1334A	33.29	-1.86;-1.18;-1.2;-0.09	-4.33	-2.49	0.73
B L1054D;D L1335D;B P1053T;D P1334T	33.29	-2.24;-1.31;-1.73;-0.01	-5.29	-2.49	1.54
B L1054C;D L1335C;B P1053A;D P1334A	33.29	-1.86;-1.18;-1.2;-0.09	-4.33	-2.49	0.73
B L1054G;D L1335G;B P1053Y;D P1334Y	33.29	-2.99;-2.18;-1.87;-0.46	-7.5	-2.48	1.42
B L1054C;D L1335C;B P1053H;D P1334H	33.29	-1.73;-1.24;-2.12;-0.69	-5.78	-2.44	0.47
B L1054E;D L1335E;B P1053H;D P1334H	33.29	-1.88;-0.93;-2.71;-0.84	-6.36	-2.43	0.06
B L1054D;D L1335D;B P1053F;D P1334F	33.29	-2.23;-1.39;-2.3;0.11	-5.81	-2.42	0.86
B L1054G;D L1335G	48.55	-3.0;-2.09	-5.09	-2.42	1.2
B L1054D;D L1335D;B P1053F;D P1334F	33.29	-2.23;-1.39;-2.3;0.11	-5.81	-2.42	0.86
B L1054A;D L1335A;B P1053A;D P1334A	33.29	-2.36;-1.57;-1.2;-0.09	-5.22	-2.41	1.09
B L1054A;D L1335A;B P1053A;D P1334A	33.29	-2.36;-1.57;-1.2;-0.09	-5.22	-2.41	1.09
B L1054E;D L1335E;B P1053A;D P1334A	33.29	-1.78;-1.43;-1.2;-0.09	-4.5	-2.39	0.02
B L1054C;D L1335C;B P1053H;D P1334H	33.29	-1.73;-1.22;-2.12;-0.69	-5.76	-2.38	0.46
B L1054P;D L1335P;B P1053A;D P1334A	33.29	-2.38;-1.44;-1.52;-0.07	-5.41	-2.35	0.33
B L1054P;D L1335P;B P1053T;D P1334T	33.29	-2.37;-1.48;-2.19;0.1	-5.94	-2.35	1.08
B L1054H;D L1335H;B P1053F;D P1334F	33.29	-1.33;-0.72;-2.47;0.04	-4.48	-2.34	0.42
B L1054D;D L1335D;B P1053Y;D P1334Y	33.29	-2.4;-1.49;-1.42;-1.26	-6.57	-2.33	1.32
B L1054H;D L1335H;B P1053A;D P1334A	33.29	-1.65;-0.67;-1.2;-0.09	-3.61	-2.33	0.54
B L1054D;D L1335D;B P1053Y;D P1334Y	33.29	-2.4;-1.49;-1.42;-1.26	-6.57	-2.33	1.32
B L1054K;D L1335K;B P1053G;D P1334G	33.29	-1.12;-0.22;-2.75;-0.81	-4.9	-2.32	0.68
B L1054H;D L1335H;B P1053T;D P1334T	33.29	-1.61;-0.74;-2.22;0.15	-4.42	-2.31	0.98
B L1054A;D L1335A;B P1053D;D P1334D	33.29	-2.36;-1.57;-2.56;0.26	-6.23	-2.29	2.79
B L1054A;D L1335A;B P1053F;D P1334F	33.29	-2.36;-1.57;-2.39;-0.23	-6.55	-2.29	1.17
B L1054A;D L1335A;B P1053D;D P1334D	33.29	-2.36;-1.57;-2.56;0.26	-6.23	-2.29	2.79
B L1054A;D L1335A;B P1053F;D P1334F	33.29	-2.36;-1.57;-2.39;-0.23	-6.55	-2.29	1.17
B L1054H;D L1335H;B P1053D;D P1334D	33.29	-1.55;-0.65;-2.5;0.2	-4.5	-2.28	1.82
B L1054P;D L1335P;B P1053N;D P1334N	33.29	-2.37;-1.65;-1.48;-0.19	-5.69	-2.26	1.1
B L1054D;D L1335D;B P1053V;D P1334V	33.29	-2.23;-1.46;-1.48;-0.33	-5.5	-2.26	0.29
B L1054E;D L1335E;B P1053D;D P1334D	33.29	-1.78;-0.88;-2.69;0.14	-5.21	-2.26	2.05
B L1054D;D L1335D;B P1053V;D P1334V	33.29	-2.23;-1.46;-1.48;-0.33	-5.5	-2.26	0.29
B L1054I;D L1335I;B P1053G;D P1334G	33.29	-0.55;-0.23;-2.75;-0.74	-4.27	-2.23	2.26
B L1054M;D L1335M;B P1053G;D P1334G	33.29	-0.37;-0.13;-2.89;-0.73	-4.12	-2.22	2.66
B L1054D;D L1335D;B P1053M;D P1334M	33.29	-2.29;-1.38;-1.78;0.25	-5.2	-2.2	-0.35
B L1054D;D L1335D;B P1053M;D P1334M	33.29	-2.29;-1.38;-1.78;0.25	-5.2	-2.2	-0.35
B L1054C;D L1335C;B P1053N;D P1334N	33.29	-1.86;-1.24;-1.95;-0.36	-5.41	-2.17	0.9
B L1054E;D L1335E;B P1053V;D P1334V	33.29	-1.71;-1.04;-1.64;-0.44	-4.83	-2.17	-0.27
B L1054N;D L1335N;B P1053K;D P1334K	33.29	-1.53;-0.98;-1.93;-0.31	-4.75	-2.16	1.12
B L1054N;D L1335N;B P1053K;D P1334K	33.29	-1.53;-0.98;-1.93;-0.31	-4.75	-2.16	1.12
B L1054E;D L1335E;B P1053F;D P1334F	33.29	-1.77;-1.03;-2.39;0.0	-5.19	-2.15	0.48
B L1054C;D L1335C;B P1053N;D P1334N	33.29	-1.86;-1.22;-1.95;-0.36	-5.39	-2.11	0.86
B L1054H;D L1335H;B P1053R;D P1334R	33.29	-1.54;-1.08;-2.2;0.15	-4.67	-2.08	0.06
B L1054A;D L1335A;B P1053V;D P1334V	33.29	-2.36;-1.57;-1.48;-0.33	-5.74	-2.07	0.69
B L1054N;D L1335N;B P1053N;D P1334N	33.29	-1.58;-0.98;-1.96;-0.45	-4.97	-2.07	0.03
B L1054A;D L1335A;B P1053V;D P1334V	33.29	-2.36;-1.57;-1.48;-0.33	-5.74	-2.07	0.69
B L1054N;D L1335N;B P1053N;D P1334N	33.29	-1.58;-0.98;-1.96;-0.45	-4.97	-2.07	0.03
B L1054E;D L1335E;B P1053W;D P1334W	33.29	-1.73;-1.04;-4.24;0.16	-6.85	-2.06	0.55
B L1054Q;D L1335Q;B P1053D;D P1334D	33.29	-0.81;-0.55;-2.57;0.05	-3.88	-2.06	2.2
B L1054N;D L1335N;B P1053S;D P1334S	33.29	-1.61;-0.72;-1.81;-0.15	-4.29	-2.05	0.1
B L1054C;D L1335C;B P1053D;D P1334D	33.29	-1.9;-1.22;-2.47;0.26	-5.33	-2.05	2.03
B L1054N;D L1335N;B P1053S;D P1334S	33.29	-1.61;-0.72;-1.81;-0.15	-4.29	-2.05	0.1
B L1054C;D L1335C;B P1053D;D P1334D	33.29	-1.9;-1.22;-2.47;0.26	-5.33	-2.05	2.03
B L1054Q;D L1335Q;B P1053T;D P1334T	33.29	-0.63;-0.52;-2.32;-0.68	-4.15	-2.04	0.75
B L1054H;D L1335H;B P1053H;D P1334H	33.29	-1.62;-0.74;-2.42;-1.0	-5.78	-2.04	0.22
B L1054Q;D L1335Q;B P1053W;D P1334W	33.29	-0.9;-0.51;-3.62;0.12	-4.91	-2.03	0.33
B L1054I;D L1335I;B P1053Y;D P1334Y	33.29	-0.52;-0.28;-2.96;-1.22	-4.98	-2.03	1.59
B L1054K;D L1335K;B P1053S;D P1334S	33.29	-1.11;-0.23;-1.87;-0.15	-3.36	-2.02	0.89
B L1054A;D L1335A;B P1053E;D P1334E	33.29	-2.36;-1.57;-2.38;1.18	-5.13	-2.01	1.34
B L1054A;D L1335A;B P1053I;D P1334I	33.29	-2.36;-1.57;-1.8;0.08	-5.65	-2.01	0.82
B L1054N;D L1335N;B P1053D;D P1334D	33.29	-1.73;-0.82;-2.48;0.14	-4.89	-2.01	2.04
B L1054H;D L1335H;B P1053K;D P1334K	33.29	-1.59;-1.01;-1.64;0.12	-4.12	-2.01	1.21
B L1054A;D L1335A;B P1053E;D P1334E	33.29	-2.36;-1.57;-2.38;1.18	-5.13	-2.01	1.34
B L1054A;D L1335A;B P1053I;D P1334I	33.29	-2.36;-1.57;-1.8;0.08	-5.65	-2.01	0.82
B L1054N;D L1335N;B P1053D;D P1334D	33.29	-1.73;-0.82;-2.48;0.14	-4.89	-2.01	2.04
B L1054C;D L1335C;B P1053F;D P1334F	33.29	-1.9;-1.24;-2.24;0.21	-5.17	-1.99	0.75
B L1054N;D L1335N;B P1053A;D P1334A	33.29	-1.48;-0.96;-1.24;-0.24	-3.92	-1.97	-0.25
B L1054N;D L1335N;B P1053A;D P1334A	33.29	-1.48;-0.96;-1.24;-0.24	-3.92	-1.97	-0.25
B L1054C;D L1335C;B P1053F;D P1334F	33.29	-1.9;-1.22;-2.24;0.21	-5.15	-1.95	0.71
B L1054D;D L1335D;B P1053R;D P1334R	33.29	-2.17;-1.39;-1.97;0.27	-5.26	-1.94	0.05
B L1054D;D L1335D;B P1053R;D P1334R	33.29	-2.17;-1.39;-1.97;0.27	-5.26	-1.94	0.05
B L1054H;D L1335H;B P1053V;D P1334V	33.29	-1.52;-0.71;-1.67;-0.36	-4.26	-1.93	0.19
B L1054A;D L1335A;B P1053M;D P1334M	33.29	-2.36;-1.57;-1.63;0.2	-5.36	-1.91	-0.6
B L1054A;D L1335A;B P1053M;D P1334M	33.29	-2.36;-1.57;-1.63;0.2	-5.36	-1.91	-0.6
B L1054F;D L1335F;B P1053G;D P1334G	33.29	-0.46;0.85;-2.75;-0.72	-3.08	-1.9	0.89
B L1054A;D L1335A;B P1053L;D P1334L	33.29	-2.36;-1.57;-1.8;0.31	-5.42	-1.9	0.27
B L1054A;D L1335A;B P1053L;D P1334L	33.29	-2.36;-1.57;-1.8;0.31	-5.42	-1.9	0.27
B L1054P;D L1335P;B P1053M;D P1334M	33.29	-2.37;-1.48;-1.39;0.32	-4.92	-1.89	-0.42
B L1054A;D L1335A;B P1053R;D P1334R	33.29	-2.42;-1.57;-1.52;0.27	-5.24	-1.89	0.17
B L1054A;D L1335A;B P1053R;D P1334R	33.29	-2.42;-1.57;-1.52;0.27	-5.24	-1.89	0.17
B L1054E;D L1335E;B P1053E;D P1334E	33.29	-1.75;-0.97;-2.35;0.93	-4.14	-1.88	1.4
B L1054D;D L1335D;B P1053L;D P1334L	33.29	-2.32;-1.39;-2.25;0.31	-5.65	-1.87	0.08
B L1054D;D L1335D;B P1053L;D P1334L	33.29	-2.32;-1.39;-2.25;0.31	-5.65	-1.87	0.08
B L1054M;D L1335M;B P1053H;D P1334H	33.29	-0.51;-0.17;-2.3;-1.17	-4.15	-1.85	3.02
B L1054C;D L1335C;B P1053M;D P1334M	33.29	-1.9;-1.18;-2.05;0.25	-4.88	-1.85	-0.25
B L1054E;D L1335E;B P1053K;D P1334K	33.29	-1.72;-1.43;-1.56;0.18	-4.53	-1.85	1.4
B L1054C;D L1335C;B P1053M;D P1334M	33.29	-1.9;-1.18;-2.05;0.25	-4.88	-1.85	-0.25
B L1054C;D L1335C;B P1053V;D P1334V	33.29	-1.73;-1.22;-1.52;-0.37	-4.84	-1.82	0.01
B L1054Q;D L1335Q;B P1053S;D P1334S	33.29	-0.82;-0.36;-1.6;-0.19	-2.97	-1.82	-0.53
B L1054C;D L1335C;B P1053V;D P1334V	33.29	-1.73;-1.22;-1.52;-0.37	-4.84	-1.82	0.01
B L1054P;D L1335P;B P1053K;D P1334K	33.29	-2.35;-1.48;-1.53;0.03	-5.33	-1.8	1.13
B L1054N;D L1335N;B P1053F;D P1334F	33.29	-1.57;-0.97;-2.29;-0.23	-5.06	-1.8	0.09
B L1054I;D L1335I;B P1053H;D P1334H	33.29	-0.54;-0.25;-2.56;-1.3	-4.65	-1.8	0.59
B L1054N;D L1335N;B P1053F;D P1334F	33.29	-1.57;-0.97;-2.29;-0.23	-5.06	-1.8	0.09
B L1054N;D L1335N;B P1053H;D P1334H	33.29	-1.52;-0.98;-2.41;-0.75	-5.66	-1.77	0.02
B L1054N;D L1335N;B P1053H;D P1334H	33.29	-1.52;-0.98;-2.41;-0.75	-5.66	-1.77	0.02
B L1054P;D L1335P;B P1053V;D P1334V	33.29	-2.37;-1.47;-1.5;-0.17	-5.51	-1.76	0.08
B L1054Q;D L1335Q;B P1053N;D P1334N	33.29	-0.79;-0.53;-1.98;-0.48	-3.78	-1.74	0.56
B L1054D;D L1335D;B P1053C;D P1334C	33.29	-2.23;-1.46;-1.64;0.02	-5.31	-1.72	-0.08
B L1054D;D L1335D;B P1053C;D P1334C	33.29	-2.23;-1.46;-1.64;0.02	-5.31	-1.72	-0.08
B L1054Q;D L1335Q;B P1053F;D P1334F	33.29	-0.82;-0.52;-2.39;-0.27	-4	-1.71	0.13
B L1054P;D L1335P;B P1053Q;D P1334Q	33.29	-2.35;-1.48;-1.35;0.78	-4.4	-1.69	0.41
B L1054D;D L1335D;B P1053K;D P1334K	33.29	-2.31;-1.32;-1.24;0.14	-4.73	-1.68	1.03
B L1054D;D L1335D;B P1053K;D P1334K	33.29	-2.31;-1.32;-1.24;0.14	-4.73	-1.68	1.03
B L1054A;D L1335A;B P1053Q;D P1334Q	33.29	-2.36;-1.57;-0.81;0.75	-3.99	-1.66	0.32
B L1054R;D L1335R;B P1053S;D P1334S	33.29	-0.58;-0.16;-1.79;-0.13	-2.66	-1.66	0.62
B L1054A;D L1335A;B P1053Q;D P1334Q	33.29	-2.36;-1.57;-0.81;0.75	-3.99	-1.66	0.32
B L1054R;D L1335R;B P1053S;D P1334S	33.29	-0.58;-0.16;-1.79;-0.13	-2.66	-1.66	0.62
B L1054H;D L1335H;B P1053W;D P1334W	33.29	-1.86;-0.08;-2.78;0.15	-4.57	-1.63	-0.58
B L1054A;D L1335A;B P1053K;D P1334K	33.29	-2.36;-1.57;-1.33;0.27	-4.99	-1.62	1.53
B L1054N;D L1335N;B P1053V;D P1334V	33.29	-1.53;-0.98;-1.52;-0.36	-4.39	-1.62	-0.01
B L1054A;D L1335A;B P1053K;D P1334K	33.29	-2.36;-1.57;-1.33;0.27	-4.99	-1.62	1.53
B L1054N;D L1335N;B P1053V;D P1334V	33.29	-1.53;-0.98;-1.52;-0.36	-4.39	-1.62	-0.01
B L1054K;D L1335K;B P1053R;D P1334R	33.29	-1.12;-0.24;-2.75;0.27	-3.84	-1.6	0.06
B L1054P;D L1335P;B P1053H;D P1334H	33.29	-2.37;-1.48;-2.26;-0.89	-7	-1.6	0.01
B L1054M;D L1335M;B P1053S;D P1334S	33.29	-0.4;-0.15;-1.82;-0.15	-2.52	-1.59	2.41
B L1054P;D L1335P;B P1053R;D P1334R	33.29	-2.37;-1.65;-1.44;0.01	-5.45	-1.59	0.22
B L1054K;D L1335K;B P1053A;D P1334A	33.29	-1.26;-0.23;-1.2;-0.09	-2.78	-1.58	0.08
B L1054K;D L1335K;B P1053D;D P1334D	33.29	-1.1;-0.25;-2.57;0.21	-3.71	-1.58	1.65
B L1054C;D L1335C;B P1053L;D P1334L	33.29	-1.73;-1.24;-2.15;0.31	-4.81	-1.58	0.07
B L1054C;D L1335C;B P1053K;D P1334K	33.29	-1.82;-1.18;-1.74;0.21	-4.53	-1.58	1.46
B L1054C;D L1335C;B P1053K;D P1334K	33.29	-1.82;-1.18;-1.74;0.21	-4.53	-1.58	1.46
B L1054A;D L1335A;B P1053C;D P1334C	33.29	-2.36;-1.57;-1.64;0.02	-5.55	-1.57	0.34
B L1054A;D L1335A;B P1053C;D P1334C	33.29	-2.36;-1.57;-1.64;0.02	-5.55	-1.57	0.34
B L1054H;D L1335H	48.55	-1.58;-0.74	-2.32	-1.56	0.04
B L1054A;D L1335A;B P1053W;D P1334W	33.29	-2.23;-1.57;-2.38;0.2	-5.98	-1.55	-0.05
B L1054A;D L1335A;B P1053W;D P1334W	33.29	-2.23;-1.57;-2.38;0.2	-5.98	-1.55	-0.05
B L1054P;D L1335P;B P1053F;D P1334F	33.29	-2.35;-1.48;-1.53;0.33	-5.03	-1.51	0.24
B L1054E;D L1335E;B P1053L;D P1334L	33.29	-1.68;-0.98;-1.74;0.31	-4.09	-1.51	-0.41
B L1054I;D L1335I;B P1053N;D P1334N	33.29	-0.54;-0.25;-2.19;-0.15	-3.13	-1.51	1.42
B L1054E;D L1335E;B P1053C;D P1334C	33.29	-1.95;-1.43;-1.58;0.02	-4.94	-1.5	-0.62
B L1054C;D L1335C;B P1053L;D P1334L	33.29	-1.73;-1.22;-2.15;0.31	-4.79	-1.5	0.06
B L1054P;D L1335P;B P1053L;D P1334L	33.29	-2.35;-1.68;-1.85;0.01	-5.87	-1.49	0.33
B L1054N;D L1335N;B P1053Y;D P1334Y	33.29	-1.6;-0.93;-1.51;-0.92	-4.96	-1.49	0.16
B L1054N;D L1335N;B P1053Y;D P1334Y	33.29	-1.6;-0.93;-1.51;-0.92	-4.96	-1.49	0.16
B L1054D;D L1335D;B P1053E;D P1334E	33.29	-2.36;-1.39;-1.85;1.16	-4.44	-1.48	1.08
B L1054H;D L1335H;B P1053C;D P1334C	33.29	-1.58;-0.83;-1.65;-0.01	-4.07	-1.48	0
B L1054D;D L1335D;B P1053E;D P1334E	33.29	-2.36;-1.39;-1.85;1.16	-4.44	-1.48	1.08
B L1054E;D L1335E;B P1053Y;D P1334Y	33.29	-1.76;-1.06;-1.48;0.36	-3.94	-1.43	0.01
B L1054G;D L1335G;B P1053W;D P1334W	33.29	-2.99;-2.09;-2.1;0.15	-7.03	-1.43	0.34
B L1054C;D L1335C;B P1053I;D P1334I	33.29	-1.73;-1.18;-1.57;0.15	-4.33	-1.42	0.04
B L1054C;D L1335C;B P1053I;D P1334I	33.29	-1.73;-1.18;-1.57;0.15	-4.33	-1.42	0.04
B L1054D;D L1335D	48.55	-2.35;-1.35	-3.7	-1.41	-0.05
B L1054I;D L1335I;B P1053S;D P1334S	33.29	-0.54;-0.24;-1.65;-0.15	-2.58	-1.41	1.5
B L1054D;D L1335D	48.55	-2.35;-1.35	-3.7	-1.41	-0.05
B L1054P;D L1335P;B P1053C;D P1334C	33.29	-2.37;-1.48;-1.55;0.18	-5.22	-1.4	0.07
B L1054H;D L1335H;B P1053L;D P1334L	33.29	-1.59;-0.26;-1.74;0.1	-3.49	-1.36	-0.07
B L1054H;D L1335H;B P1053Y;D P1334Y	33.29	-1.68;-0.78;-1.82;0.55	-3.73	-1.36	0.03
B L1054A;D L1335A;B P1053Y;D P1334Y	33.29	-2.29;-1.57;-0.86;0.49	-4.23	-1.35	0.52
B L1054C;D L1335C;B P1053Q;D P1334Q	33.29	-1.86;-1.22;-1.37;0.73	-3.72	-1.35	0.29
B L1054A;D L1335A;B P1053Y;D P1334Y	33.29	-2.29;-1.57;-0.86;0.49	-4.23	-1.35	0.52
B L1054C;D L1335C;B P1053Q;D P1334Q	33.29	-1.86;-1.22;-1.37;0.73	-3.72	-1.35	0.29
B L1054N;D L1335N;B P1053C;D P1334C	33.29	-1.65;-0.89;-1.65;-0.65	-4.84	-1.33	-0.14
B L1054N;D L1335N;B P1053C;D P1334C	33.29	-1.65;-0.89;-1.65;-0.65	-4.84	-1.33	-0.14
B L1054K;D L1335K;B P1053N;D P1334N	33.29	-1.11;-0.24;-1.71;-0.31	-3.37	-1.31	0.04
B L1054P;D L1335P;B P1053I;D P1334I	33.29	-2.37;-1.53;-1.31;0.05	-5.16	-1.3	0.42
B L1054Q;D L1335Q;B P1053H;D P1334H	33.29	-0.63;-0.43;-2.14;-1.09	-4.29	-1.3	-0.09
B L1054H;D L1335H;B P1053M;D P1334M	33.29	-1.58;-0.07;-1.76;0.37	-3.04	-1.3	-1.68
B L1054R;D L1335R;B P1053T;D P1334T	33.29	-0.57;-0.06;-2.26;-0.2	-3.09	-1.29	0.68
B L1054E;D L1335E;B P1053M;D P1334M	33.29	-1.76;-0.86;-1.62;0.17	-4.07	-1.29	-1.65
B L1054R;D L1335R;B P1053T;D P1334T	33.29	-0.57;-0.06;-2.26;-0.2	-3.09	-1.29	0.68
B L1054P;D L1335P;B P1053E;D P1334E	33.29	-2.37;-1.48;-1.59;1.04	-4.4	-1.28	0.46
B L1054C;D L1335C;B P1053W;D P1334W	33.29	-1.94;-1.22;-2.75;0.2	-5.71	-1.28	0.14
B L1054C;D L1335C;B P1053W;D P1334W	33.29	-1.94;-1.22;-2.75;0.2	-5.71	-1.28	0.14
B L1054N;D L1335N;B P1053E;D P1334E	33.29	-1.72;-0.97;-1.85;0.64	-3.9	-1.27	0.82
B L1054N;D L1335N;B P1053E;D P1334E	33.29	-1.72;-0.97;-1.85;0.64	-3.9	-1.27	0.82
B L1054A;D L1335A	48.55	-2.42;-1.58	-4	-1.25	0.61
B L1054A;D L1335A	48.55	-2.42;-1.58	-4	-1.25	0.61
B L1054K;D L1335K;B P1053T;D P1334T	33.29	-0.93;-0.25;-2.26;-0.22	-3.66	-1.22	0.59
B L1054K;D L1335K;B P1053V;D P1334V	33.29	-1.13;-0.53;-1.62;-0.52	-3.8	-1.22	-0.12
B L1054D;D L1335D;B P1053W;D P1334W	33.29	-2.3;-1.59;-2.48;0.24	-6.13	-1.21	-0.32
B L1054D;D L1335D;B P1053W;D P1334W	33.29	-2.3;-1.59;-2.48;0.24	-6.13	-1.21	-0.32
B L1054C;D L1335C;B P1053E;D P1334E	33.29	-1.9;-1.24;-1.63;1.0	-3.77	-1.21	0.74
B L1054C;D L1335C;B P1053R;D P1334R	33.29	-1.86;-1.18;-0.91;0.27	-3.68	-1.2	0.08
B L1054I;D L1335I;B P1053D;D P1334D	33.29	-0.54;-0.24;-2.42;0.2	-3	-1.2	3
B L1054C;D L1335C;B P1053R;D P1334R	33.29	-1.86;-1.18;-0.91;0.27	-3.68	-1.2	0.08
B L1054D;D L1335D;B P1053I;D P1334I	33.29	-2.18;-1.48;-0.77;0.15	-4.28	-1.19	-0.01
B L1054Q;D L1335Q;B P1053A;D P1334A	33.29	-0.86;-0.25;-1.2;-0.09	-2.4	-1.19	-0.62
B L1054D;D L1335D;B P1053I;D P1334I	33.29	-2.18;-1.48;-0.77;0.15	-4.28	-1.19	-0.01
B L1054C;D L1335C;B P1053Y;D P1334Y	33.29	-1.67;-1.18;-3.14;0.57	-5.42	-1.18	0.31
B L1054C;D L1335C;B P1053Y;D P1334Y	33.29	-1.67;-1.18;-3.14;0.57	-5.42	-1.18	0.31
B L1054R;D L1335R;B P1053A;D P1334A	33.29	-0.61;-0.05;-1.15;-0.09	-1.9	-1.15	-0.21
B L1054R;D L1335R;B P1053A;D P1334A	33.29	-0.61;-0.05;-1.15;-0.09	-1.9	-1.15	-0.21
B L1054K;D L1335K;B P1053F;D P1334F	33.29	-1.14;-0.44;-2.22;-0.08	-3.88	-1.14	-0.17
B L1054F;D L1335F;B P1053N;D P1334N	33.29	-0.47;-0.07;-2.07;-0.5	-3.11	-1.14	1.45
B L1054E;D L1335E	48.55	-1.78;-1.08	-2.86	-1.14	-0.51
B L1054Q;D L1335Q;B P1053M;D P1334M	33.29	-0.79;-0.49;-2.09;0.21	-3.16	-1.14	-1.77
B L1054K;D L1335K;B P1053H;D P1334H	33.29	-0.9;-0.25;-2.19;-0.62	-3.96	-1.13	-0.05
B L1054M;D L1335M;B P1053N;D P1334N	33.29	-0.36;-0.11;-2.23;-0.37	-3.07	-1.09	0.81
B L1054D;D L1335D;B P1053Q;D P1334Q	33.29	-2.29;-1.53;-0.58;0.72	-3.68	-1.09	-0.07
B L1054D;D L1335D;B P1053Q;D P1334Q	33.29	-2.29;-1.53;-0.58;0.72	-3.68	-1.09	-0.07
B L1054F;D L1335F;B P1053T;D P1334T	33.29	-0.46;-0.25;-1.94;-0.53	-3.18	-1.08	2.34
B L1054C;D L1335C;B P1053E;D P1334E	33.29	-1.9;-1.22;-1.63;1.0	-3.75	-1.08	0.7
B L1054I;D L1335I;B P1053F;D P1334F	33.29	-0.49;-0.23;-2.95;0.04	-3.63	-1.06	0.42
B L1054P;D L1335P;B P1053Y;D P1334Y	33.29	-2.35;-1.61;-1.21;-0.12	-5.29	-1.05	0.21
B L1054N;D L1335N;B P1053W;D P1334W	33.29	-1.86;-1.01;-2.75;-0.0	-5.62	-1.05	-0.42
B L1054E;D L1335E;B P1053Q;D P1334Q	33.29	-1.76;-1.42;-0.79;0.84	-3.13	-1.05	-0.62
B L1054N;D L1335N;B P1053W;D P1334W	33.29	-1.86;-1.01;-2.75;-0.0	-5.62	-1.05	-0.42
B L1054N;D L1335N;B P1053M;D P1334M	33.29	-1.52;-0.72;-1.83;0.06	-4.01	-1.04	-1.56
B L1054N;D L1335N;B P1053M;D P1334M	33.29	-1.52;-0.72;-1.83;0.06	-4.01	-1.04	-1.56
B L1054R;D L1335R;B P1053N;D P1334N	33.29	-0.52;-0.46;-1.99;-0.37	-3.34	-1.03	-0.19
B L1054R;D L1335R;B P1053N;D P1334N	33.29	-0.52;-0.46;-1.99;-0.37	-3.34	-1.03	-0.19
B L1054P;D L1335P;B P1053W;D P1334W	33.29	-2.56;-1.48;-2.31;0.14	-6.21	-1.02	0.04
B L1054K;D L1335K;B P1053M;D P1334M	33.29	-1.05;-0.41;-2.14;0.2	-3.4	-1.01	-1.08
B L1054C;D L1335C;B P1053C;D P1334C	33.29	-1.9;-1.18;-1.64;0.02	-4.7	-1	0.1
B L1054H;D L1335H;B P1053Q;D P1334Q	33.29	-1.69;-0.67;-0.81;0.56	-2.61	-1	-0.02
B L1054C;D L1335C;B P1053C;D P1334C	33.29	-1.9;-1.18;-1.64;0.02	-4.7	-1	0.1
B L1054K;D L1335K;B P1053Y;D P1334Y	33.29	-1.11;-0.23;-1.51;-0.79	-3.64	-0.97	0.39
B L1054H;D L1335H;B P1053I;D P1334I	33.29	-1.48;-0.75;-1.26;0.13	-3.36	-0.91	0.05
B L1054N;D L1335N	48.55	-1.66;-0.97	-2.63	-0.89	-0.21
B L1054N;D L1335N	48.55	-1.66;-0.97	-2.63	-0.89	-0.21
B L1054M;D L1335M;B P1053T;D P1334T	33.29	-0.37;-0.14;-2.26;-0.07	-2.84	-0.88	1.69
B L1054N;D L1335N;B P1053L;D P1334L	33.29	-1.62;-0.9;-1.75;0.18	-4.09	-0.88	-0.59
B L1054N;D L1335N;B P1053L;D P1334L	33.29	-1.62;-0.9;-1.75;0.18	-4.09	-0.88	-0.59
B L1054K;D L1335K;B P1053E;D P1334E	33.29	-1.19;-0.34;-2.49;1.13	-2.89	-0.86	0.01
B L1054R;D L1335R;B P1053H;D P1334H	33.29	-0.59;-0.05;-2.19;-0.62	-3.45	-0.84	-0.02
B L1054R;D L1335R;B P1053H;D P1334H	33.29	-0.59;-0.05;-2.19;-0.62	-3.45	-0.84	-0.02
B L1054R;D L1335R;B P1053D;D P1334D	33.29	-0.53;-0.06;-2.48;0.22	-2.85	-0.82	1.25
B L1054R;D L1335R;B P1053D;D P1334D	33.29	-0.53;-0.06;-2.48;0.22	-2.85	-0.82	1.25
B L1054Q;D L1335Q;B P1053C;D P1334C	33.29	-0.81;-0.48;-1.88;-0.1	-3.27	-0.8	-0.68
B L1054M;D L1335M;B P1053D;D P1334D	33.29	-0.36;-0.12;-2.7;0.25	-2.93	-0.78	2.95
B L1054K;D L1335K;B P1053W;D P1334W	33.29	-1.57;-0.35;-2.63;-0.34	-4.89	-0.77	-0.75
B L1054R;D L1335R;B P1053F;D P1334F	33.29	-0.58;-0.08;-2.39;0.04	-3.01	-0.77	-0.34
B L1054R;D L1335R;B P1053F;D P1334F	33.29	-0.58;-0.08;-2.39;0.04	-3.01	-0.77	-0.34
B L1054F;D L1335F;B P1053D;D P1334D	33.29	-0.31;-0.03;-2.62;0.24	-2.72	-0.75	2.83
B L1054F;D L1335F;B P1053H;D P1334H	33.29	-0.62;0.89;-2.35;-0.94	-3.02	-0.75	-0.34
B L1054E;D L1335E;B P1053I;D P1334I	33.29	-1.86;-0.89;-0.87;0.26	-3.36	-0.74	-0.69
B L1054N;D L1335N;B P1053I;D P1334I	33.29	-1.53;-0.92;-1.62;0.24	-3.83	-0.71	-0.85
B L1054Q;D L1335Q;B P1053R;D P1334R	33.29	-0.83;-0.44;-1.77;0.27	-2.77	-0.71	-0.08
B L1054I;D L1335I;B P1053W;D P1334W	33.29	-0.56;-0.23;-2.67;0.11	-3.35	-0.71	-0.6
B L1054N;D L1335N;B P1053I;D P1334I	33.29	-1.53;-0.92;-1.62;0.24	-3.83	-0.71	-0.85
B L1054Q;D L1335Q;B P1053V;D P1334V	33.29	-0.81;-0.37;-1.52;-0.33	-3.03	-0.7	-0.95
B L1054C;D L1335C	48.55	-1.82;-1.32	-3.14	-0.69	0.44
B L1054I;D L1335I;B P1053R;D P1334R	33.29	-0.52;-0.24;-2.09;0.27	-2.58	-0.69	-0.02
B L1054I;D L1335I;B P1053M;D P1334M	33.29	-0.52;-0.25;-1.97;0.25	-2.49	-0.69	0.44
B L1054C;D L1335C	48.55	-1.82;-1.32	-3.14	-0.69	0.44
B L1054F;D L1335F;B P1053S;D P1334S	33.29	-0.47;0.88;-1.75;-0.05	-1.39	-0.68	-0.68
B L1054Q;D L1335Q;B P1053K;D P1334K	33.29	-0.83;-0.43;-1.63;0.25	-2.64	-0.65	0.58
B L1054P;D L1335P	48.55	-2.42;-1.34	-3.76	-0.64	0.16
B L1054Q;D L1335Q;B P1053Y;D P1334Y	33.29	-0.82;-0.52;-1.82;0.42	-2.74	-0.62	-0.1
B L1054F;D L1335F;B P1053W;D P1334W	33.29	-0.74;-0.03;-3.25;0.16	-3.86	-0.61	-0.59
B L1054I;D L1335I;B P1053K;D P1334K	33.29	-0.54;-0.28;-1.71;0.22	-2.31	-0.61	2.1
B L1054H;D L1335H;B P1053E;D P1334E	33.29	-1.55;-0.15;-1.73;1.11	-2.32	-0.57	0.04
B L1054F;D L1335F;B P1053M;D P1334M	33.29	-0.39;-0.12;-1.81;0.25	-2.07	-0.54	1.29
B L1054I;D L1335I;B P1053A;D P1334A	33.29	-0.52;-0.23;-1.2;-0.13	-2.08	-0.49	0.06
B L1054K;D L1335K;B P1053C;D P1334C	33.29	-1.06;-0.25;-1.58;0.02	-2.87	-0.48	-0.66
B L1054M;D L1335M;B P1053R;D P1334R	33.29	-0.37;-0.13;-2.26;0.21	-2.55	-0.48	0.64
B L1054F;D L1335F;B P1053F;D P1334F	33.29	-0.39;-0.04;-2.11;0.01	-2.53	-0.44	0.77
B L1054F;D L1335F;B P1053A;D P1334A	33.29	-0.46;-0.03;-1.15;-0.09	-1.73	-0.33	-0.02
B L1054Q;D L1335Q;B P1053L;D P1334L	33.29	-0.83;-0.38;-1.69;0.13	-2.77	-0.33	-0.91
B L1054Q;D L1335Q;B P1053I;D P1334I	33.29	-0.79;-0.39;-1.58;0.18	-2.58	-0.31	-1.12
B L1054I;D L1335I;B P1053T;D P1334T	33.29	-0.53;-0.22;-1.84;-0.03	-2.62	-0.28	0.37
B L1054N;D L1335N;B P1053Q;D P1334Q	33.29	-1.53;-0.8;-0.81;0.59	-2.55	-0.27	-0.87
B L1054N;D L1335N;B P1053Q;D P1334Q	33.29	-1.53;-0.8;-0.81;0.59	-2.55	-0.27	-0.87
B L1054M;D L1335M;B P1053F;D P1334F	33.29	-0.35;-0.11;-2.46;0.14	-2.78	-0.26	-0.08
B L1054R;D L1335R;B P1053R;D P1334R	33.29	-0.59;-0.14;-2.0;0.16	-2.57	-0.26	-0.75
B L1054R;D L1335R;B P1053R;D P1334R	33.29	-0.59;-0.14;-2.0;0.16	-2.57	-0.26	-0.75
B L1054M;D L1335M;B P1053W;D P1334W	33.29	-0.41;-0.13;-2.74;0.22	-3.06	-0.25	-0.75
B L1054K;D L1335K;B P1053L;D P1334L	33.29	-0.99;-0.25;-1.81;0.31	-2.74	-0.22	-0.56
B L1054M;D L1335M;B P1053M;D P1334M	33.29	-0.45;-0.15;-1.91;0.25	-2.26	-0.21	-0.13
B L1054R;D L1335R;B P1053V;D P1334V	33.29	-0.51;-0.06;-1.52;-0.22	-2.31	-0.21	-0.79
B L1054R;D L1335R;B P1053V;D P1334V	33.29	-0.51;-0.06;-1.52;-0.22	-2.31	-0.21	-0.79
B L1054F;D L1335F;B P1053Y;D P1334Y	33.29	-0.62;-0.35;-1.94;0.72	-2.19	-0.2	0.48
B L1054M;D L1335M;B P1053A;D P1334A	33.29	-0.36;-0.12;-1.2;-0.09	-1.77	-0.19	0.4
B L1054E;D L1335E;B P1053R;D P1334R	33.29	-1.74;-0.83;-0.17;0.27	-2.47	-0.19	-1.47
B P1053H;D P1334H	47.46	-3.09;-2.08	-5.17	-0.17	0.04
B P1053G;D P1334G	47.46	-2.77;-0.7	-3.47	-0.14	0.04
B L1054K;D L1335K	48.55	-1.11;-0.32	-1.43	-0.14	-0.54
B L1054I;D L1335I;B P1053V;D P1334V	33.29	-0.54;-0.24;-1.56;-0.22	-2.56	-0.13	-0.01
B L1054F;D L1335F;B P1053V;D P1334V	33.29	-0.46;-0.29;-1.55;-0.33	-2.63	-0.11	-0.03
B L1054R;D L1335R;B P1053K;D P1334K	33.29	-0.48;-0.19;-1.74;0.24	-2.17	-0.11	0.07
B L1054R;D L1335R;B P1053K;D P1334K	33.29	-0.48;-0.19;-1.74;0.24	-2.17	-0.11	0.07
B L1054M;D L1335M;B P1053V;D P1334V	33.29	-0.45;-0.15;-1.43;-0.39	-2.42	-0.09	0.73
B L1054I;D L1335I;B P1053E;D P1334E	33.29	-0.56;-0.24;-2.3;1.15	-1.95	-0.03	0.5
B L1054K;D L1335K;B P1053I;D P1334I	33.29	-1.11;-0.31;-0.76;-0.1	-2.28	-0.02	-0.27
B P1053F;D P1334F	47.46	-2.18;0.18	-2	-0.01	0.3
B L1054R;D L1335R;B P1053W;D P1334W	33.29	-0.83;-0.1;-2.64;0.11	-3.46	0	-1.34
B L1054R;D L1335R;B P1053W;D P1334W	33.29	-0.83;-0.1;-2.64;0.11	-3.46	0	-1.34
B P1053D;D P1334D	47.46	-2.5;0.12	-2.38	0.01	1.14
B P1053S;D P1334S	47.46	-1.71;-0.04	-1.75	0.03	0.04
B L1054N;D L1335N;B P1053R;D P1334R	33.29	-1.53;-0.72;-1.15;0.35	-3.05	0.04	-0.58
B L1054N;D L1335N;B P1053R;D P1334R	33.29	-1.53;-0.72;-1.15;0.35	-3.05	0.04	-0.58
B P1053N;D P1334N	47.46	-2.22;-0.14	-2.36	0.05	0.1
B L1054M;D L1335M;B P1053K;D P1334K	33.29	-0.36;-0.11;-1.74;0.22	-1.99	0.05	2.05
B L1054F;D L1335F;B P1053K;D P1334K	33.29	-0.69;0.87;-1.87;0.16	-1.53	0.05	1.15
B L1054K;D L1335K;B P1053K;D P1334K	33.29	-1.01;-0.23;-1.02;0.01	-2.25	0.07	0.94
B L1054F;D L1335F;B P1053R;D P1334R	33.29	-0.28;1.05;-2.23;0.22	-1.24	0.07	-1.13
B P1053A;D P1334A	47.46	-1.27;-0.1	-1.37	0.08	-0.33
B L1054F;D L1335F;B P1053L;D P1334L	33.29	-0.5;0.0;-1.75;0.1	-2.15	0.12	-0.54
B P1053Y;D P1334Y	47.46	-1.79;0.13	-1.66	0.13	0
B L1054I;D L1335I;B P1053C;D P1334C	33.29	-0.55;-0.24;-1.43;0.02	-2.2	0.13	-0.34
B L1054I;D L1335I;B P1053L;D P1334L	33.29	-0.52;-0.24;-1.55;0.34	-1.97	0.13	-0.26
B L1054M;D L1335M	48.55	-0.45;-0.17	-0.62	0.14	0.27
B L1054I;D L1335I;B P1053Q;D P1334Q	33.29	-0.51;-0.23;-1.41;0.83	-1.32	0.16	0.32
B L1054R;D L1335R;B P1053E;D P1334E	33.29	-0.58;-0.18;-2.42;1.15	-2.03	0.17	-0.78
B L1054R;D L1335R;B P1053L;D P1334L	33.29	-0.58;-0.09;-1.56;0.16	-2.07	0.17	-1.07
B L1054R;D L1335R;B P1053E;D P1334E	33.29	-0.58;-0.18;-2.42;1.15	-2.03	0.17	-0.78
B L1054R;D L1335R;B P1053L;D P1334L	33.29	-0.58;-0.09;-1.56;0.16	-2.07	0.17	-1.07
B L1054M;D L1335M;B P1053L;D P1334L	33.29	-0.37;-0.13;-1.78;0.15	-2.13	0.18	-0.17
B L1054M;D L1335M;B P1053C;D P1334C	33.29	-0.36;-0.15;-1.88;0.02	-2.37	0.19	0.05
B L1054I;D L1335I	48.55	-0.53;-0.27	-0.8	0.2	0.4
B L1054M;D L1335M;B P1053I;D P1334I	33.29	-0.37;-0.13;-1.56;0.18	-1.88	0.21	-0.01
B L1054F;D L1335F;B P1053C;D P1334C	33.29	-0.46;-0.04;-1.61;0.02	-2.09	0.21	-0.56
B L1054R;D L1335R;B P1053Y;D P1334Y	33.29	-0.54;-0.05;-1.41;0.46	-1.54	0.21	-0.5
B L1054R;D L1335R;B P1053Y;D P1334Y	33.29	-0.54;-0.05;-1.41;0.46	-1.54	0.21	-0.5
B P1053W;D P1334W	47.46	-1.99;-0.06	-2.05	0.23	-0.41
B L1054R;D L1335R;B P1053I;D P1334I	33.29	-0.68;-0.29;-0.94;0.03	-1.88	0.31	-0.54
B L1054R;D L1335R;B P1053I;D P1334I	33.29	-0.68;-0.29;-0.94;0.03	-1.88	0.31	-0.54
B P1053M;D P1334M	47.46	-2.04;0.31	-1.73	0.32	-1.35
B L1054Q;D L1335Q	48.55	-0.87;-0.41	-1.28	0.32	-0.97
B L1054I;D L1335I;B P1053I;D P1334I	33.29	-0.54;-0.24;-0.88;0.19	-1.47	0.34	-0.05
B L1054R;D L1335R;B P1053C;D P1334C	33.29	-0.54;-0.18;-1.64;0.02	-2.34	0.37	-0.99
B L1054R;D L1335R;B P1053C;D P1334C	33.29	-0.54;-0.18;-1.64;0.02	-2.34	0.37	-0.99
B L1054R;D L1335R;B P1053M;D P1334M	33.29	-0.58;-0.06;-1.86;-0.05	-2.55	0.38	-2.12
B L1054R;D L1335R;B P1053M;D P1334M	33.29	-0.58;-0.06;-1.86;-0.05	-2.55	0.38	-2.12
B P1053L;D P1334L	47.46	-1.84;0.33	-1.51	0.4	-0.19
B P1053I;D P1334I	47.46	-1.79;0.29	-1.5	0.43	-0.39
B L1054Q;D L1335Q;B P1053E;D P1334E	33.29	-0.79;-0.51;-1.69;1.13	-1.86	0.44	-0.31
B L1054R;D L1335R;B P1053Q;D P1334Q	33.29	-0.55;-0.18;-1.28;0.64	-1.37	0.52	-0.4
B L1054R;D L1335R;B P1053Q;D P1334Q	33.29	-0.55;-0.18;-1.28;0.64	-1.37	0.52	-0.4
B L1054M;D L1335M;B P1053Y;D P1334Y	33.29	-0.37;-0.13;-1.76;0.63	-1.63	0.62	0.42
B P1053V;D P1334V	47.46	-1.59;-0.32	-1.91	0.63	-0.7
B L1054F;D L1335F	48.55	-0.33;-0.19	-0.52	0.66	0.01
B L1054M;D L1335M;B P1053E;D P1334E	33.29	-0.37;-0.16;-1.78;1.15	-1.16	0.72	0.83
B L1054F;D L1335F;B P1053I;D P1334I	33.29	-0.45;0.93;-1.63;0.13	-1.02	0.72	-1.07
B L1054R;D L1335R	48.55	-0.58;-0.04	-0.62	0.73	-0.93
B L1054R;D L1335R	48.55	-0.58;-0.04	-0.62	0.73	-0.93
B P1053K;D P1334K	47.46	-1.66;0.33	-1.33	0.76	0.02
B L1054M;D L1335M;B P1053Q;D P1334Q	33.29	-0.36;-0.11;-1.03;0.59	-0.91	0.83	-0.01
B L1054Q;D L1335Q;B P1053Q;D P1334Q	33.29	-0.8;-0.4;-0.91;0.78	-1.33	0.84	-1.08
B L1054F;D L1335F;B P1053Q;D P1334Q	33.29	-0.46;-0.03;-1.22;0.83	-0.88	0.88	-0.86
B L1054K;D L1335K;B P1053Q;D P1334Q	33.29	-1.09;-0.24;-0.53;0.83	-1.03	0.89	-0.79
B P1053T;D P1334T	47.46	-1.79;0.33	-1.46	0.91	0.08
B P1053R;D P1334R	47.46	-1.35;0.39	-0.96	1.03	-1.05
B P1053C;D P1334C	47.46	-1.58;0.1	-1.48	1.08	-0.31
B L1054F;D L1335F;B P1053E;D P1334E	33.29	-0.39;0.89;-1.73;1.02	-0.21	1.19	-1.59
B P1053Q;D P1334Q	47.46	-1.53;1.24	-0.29	1.52	-0.98
B P1053E;D P1334E	47.46	-1.73;1.18	-0.55	1.65	-0.84
