# Supplementary material for: Bio-Chemoinformatics-Driven Analysis of nsp7 and nsp8 Mutations and Their Effects on Viral Replication Protein Complex Stability
Source: Curr Issues Mol Biol. 2024 Mar 18;46(3):2598–619. doi: 10.3390/cimb46030165 (PMC10968879; doi:10.3390/cimb46030165)
Supplement: Supplementary file 1 [file cimb-46-00165-s001.zip › Supplementary Dataset S8. Computational alanine scan of the viral replication complex.xlsx]

## Sheet: complete A chain
Chain	Native Sequennce	Position	Mutant Sequence	Delta Delta G		Number of Residues	Percentage
A	S	1	A	-11.37	Destabilizing	730	84.1
A	F	45	A	-3.83	Stabilizing	138	15.9
A	Y	237	A	-3.81
A	L	241	A	-3.65
A	C	301	A	-3.63
A	L	207	A	-3.48
A	L	240	A	-3.46
A	C	306	A	-3.39
A	L	127	A	-3.38
A	F	317	A	-3.38
A	I	466	A	-3.38
A	M	196	A	-3.37
A	I	201	A	-3.35
A	L	329	A	-3.34
A	Y	787	A	-3.32
A	F	368	A	-3.31
A	Y	674	A	-3.31
A	I	114	A	-3.28
A	I	145	A	-3.28
A	L	630	A	-3.28
A	F	694	A	-3.27
A	Y	728	A	-3.27
A	Y	515	A	-3.26
A	I	632	A	-3.26
A	F	56	A	-3.24
A	I	757	A	-3.23
A	L	308	A	-3.22
A	Y	453	A	-3.22
A	Y	87	A	-3.21
A	Y	732	A	-3.2
A	Y	346	A	-3.19
A	L	673	A	-3.19
A	L	469	A	-3.16
A	L	316	A	-3.15
A	C	645	A	-3.15
A	M	899	A	-3.14
A	Y	788	A	-3.13
A	L	178	A	-3.12
A	L	388	A	-3.12
A	W	216	A	-3.11
A	L	575	A	-3.1
A	W	598	A	-3.1
A	F	766	A	-3.09
A	L	251	A	-3.08
A	Y	273	A	-3.07
A	W	617	A	-3.07
A	F	415	A	-3.06
A	L	655	A	-3.06
A	I	696	A	-3.06
A	Y	374	A	-3.01
A	F	471	A	-3.01
A	Y	479	A	-3.01
A	L	638	A	-3.01
A	L	786	A	-3.01
A	L	245	A	-2.99
A	F	70	A	-2.98
A	L	212	A	-2.98
A	W	509	A	-2.98
A	L	723	A	-2.98
A	L	727	A	-2.98
A	F	326	A	-2.97
A	L	371	A	-2.97
A	F	340	A	-2.96
A	M	633	A	-2.96
A	Y	887	A	-2.96
A	F	782	A	-2.95
A	F	812	A	-2.95
A	L	271	A	-2.94
A	F	745	A	-2.94
A	L	19	A	-2.93
A	L	90	A	-2.93
A	L	351	A	-2.93
A	L	749	A	-2.93
A	Y	122	A	-2.91
A	L	708	A	-2.91
A	L	891	A	-2.91
A	F	134	A	-2.9
A	Y	286	A	-2.89
A	F	571	A	-2.89
A	L	602	A	-2.89
A	F	652	A	-2.89
A	F	101	A	-2.88
A	C	487	A	-2.87
A	V	535	A	-2.87
A	M	756	A	-2.87
A	L	387	A	-2.86
A	Y	80	A	-2.85
A	L	131	A	-2.85
A	L	527	A	-2.84
A	L	119	A	-2.81
A	L	187	A	-2.81
A	F	348	A	-2.81
A	L	372	A	-2.81
A	V	693	A	-2.8
A	L	707	A	-2.8
A	F	793	A	-2.8
A	F	48	A	-2.79
A	L	614	A	-2.78
A	Y	653	A	-2.77
A	V	667	A	-2.77
A	F	859	A	-2.76
A	L	758	A	-2.75
A	L	186	A	-2.74
A	F	192	A	-2.74
A	L	282	A	-2.74
A	L	389	A	-2.74
A	I	562	A	-2.74
A	I	536	A	-2.73
A	F	287	A	-2.72
A	Y	69	A	-2.71
A	I	244	A	-2.71
A	Y	456	A	-2.71
A	M	124	A	-2.69
A	F	504	A	-2.69
A	V	700	A	-2.68
A	I	171	A	-2.67
A	Y	458	A	-2.66
A	Y	619	A	-2.65
A	L	885	A	-2.65
A	L	498	A	-2.63
A	F	313	A	-2.62
A	I	715	A	-2.61
A	L	544	A	-2.6
A	L	854	A	-2.59
A	I	589	A	-2.58
A	Y	294	A	-2.57
A	M	666	A	-2.57
A	M	463	A	-2.56
A	L	731	A	-2.56
A	L	838	A	-2.56
A	V	128	A	-2.55
A	Y	420	A	-2.55
A	I	548	A	-2.53
A	I	333	A	-2.52
A	V	475	A	-2.52
A	V	764	A	-2.5
A	Y	606	A	-2.49
A	M	629	A	-2.49
A	V	71	A	-2.48
A	L	270	A	-2.47
A	H	347	A	-2.47
A	N	657	A	-2.47
A	V	182	A	-2.46
A	F	35	A	-2.45
A	F	419	A	-2.43
A	L	460	A	-2.41
A	L	470	A	-2.41
A	F	506	A	-2.41
A	Y	831	A	-2.41
A	Y	877	A	-2.41
A	Y	217	A	-2.4
A	Y	238	A	-2.4
A	L	819	A	-2.4
A	L	366	A	-2.39
A	F	741	A	-2.39
A	Y	746	A	-2.39
A	V	96	A	-2.38
A	Y	289	A	-2.38
A	Y	828	A	-2.38
A	Y	38	A	-2.37
A	I	86	A	-2.37
A	F	102	A	-2.37
A	F	753	A	-2.37
A	L	8	A	-2.36
A	M	519	A	-2.36
A	Y	516	A	-2.35
A	M	566	A	-2.35
A	M	626	A	-2.35
A	V	353	A	-2.34
A	Y	748	A	-2.33
A	N	767	A	-2.33
A	L	663	A	-2.32
A	F	321	A	-2.3
A	F	429	A	-2.3
A	V	476	A	-2.3
A	M	242	A	-2.29
A	I	307	A	-2.29
A	V	330	A	-2.29
A	L	883	A	-2.29
A	V	72	A	-2.27
A	F	275	A	-2.27
A	F	480	A	-2.27
A	L	636	A	-2.27
A	I	837	A	-2.27
A	L	247	A	-2.26
A	V	341	A	-2.26
A	Y	129	A	-2.25
A	F	407	A	-2.25
A	L	205	A	-2.24
A	Y	925	A	-2.24
A	V	472	A	-2.23
A	L	172	A	-2.22
A	N	534	A	-2.22
A	L	869	A	-2.22
A	F	396	A	-2.21
A	V	587	A	-2.21
A	V	637	A	-2.2
A	I	779	A	-2.2
A	V	588	A	-2.19
A	V	792	A	-2.19
A	F	104	A	-2.18
A	N	312	A	-2.18
A	Y	530	A	-2.18
A	Y	719	A	-2.18
A	F	442	A	-2.17
A	Y	455	A	-2.17
A	Y	175	A	-2.16
A	F	422	A	-2.16
A	F	428	A	-2.16
A	V	776	A	-2.16
A	Y	149	A	-2.15
A	I	450	A	-2.15
A	L	142	A	-2.14
A	V	342	A	-2.12
A	F	594	A	-2.12
A	V	605	A	-2.12
A	F	528	A	-2.11
A	W	800	A	-2.11
A	L	89	A	-2.1
A	N	568	A	-2.1
A	R	654	A	-2.09
A	M	794	A	-2.09
A	L	862	A	-2.09
A	Y	689	A	-2.08
A	F	157	A	-2.07
A	F	441	A	-2.07
A	F	7	A	-2.06
A	H	99	A	-2.06
A	F	165	A	-2.06
A	V	398	A	-2.06
A	L	514	A	-2.06
A	Y	163	A	-2.05
A	T	189	A	-2.05
A	W	268	A	-2.05
A	L	805	A	-2.05
A	R	116	A	-2.04
A	Y	483	A	-2.04
A	Y	770	A	-2.04
A	I	37	A	-2.02
A	H	572	A	-2.02
A	H	752	A	-2.02
A	R	467	A	-2.01
A	F	881	A	-2.01
A	V	493	A	-2
A	V	763	A	-2
A	I	856	A	-2
A	V	827	A	-1.99
A	H	113	A	-1.98
A	V	354	A	-1.98
A	M	755	A	-1.98
A	M	542	A	-1.97
A	M	601	A	-1.97
A	M	668	A	-1.97
A	R	631	A	-1.96
A	N	790	A	-1.96
A	N	416	A	-1.95
A	V	848	A	-1.95
A	V	166	A	-1.93
A	C	464	A	-1.93
A	N	703	A	-1.93
A	N	459	A	-1.9
A	Y	884	A	-1.88
A	Y	903	A	-1.88
A	V	905	A	-1.88
A	Y	915	A	-1.88
A	N	356	A	-1.87
A	Y	826	A	-1.86
A	R	279	A	-1.85
A	F	334	A	-1.85
A	I	864	A	-1.85
A	I	888	A	-1.85
A	L	900	A	-1.85
A	L	261	A	-1.84
A	V	785	A	-1.84
A	F	222	A	-1.83
A	M	924	A	-1.83
A	L	49	A	-1.82
A	I	66	A	-1.8
A	V	202	A	-1.8
A	W	162	A	-1.79
A	F	219	A	-1.79
A	Y	546	A	-1.79
A	N	297	A	-1.77
A	I	539	A	-1.77
A	L	895	A	-1.77
A	L	280	A	-1.76
A	L	361	A	-1.76
A	L	401	A	-1.76
A	M	818	A	-1.76
A	V	234	A	-1.75
A	V	405	A	-1.75
A	L	146	A	-1.74
A	D	465	A	-1.74
A	V	704	A	-1.74
A	L	65	A	-1.73
A	V	609	A	-1.73
A	V	473	A	-1.71
A	Y	921	A	-1.71
A	V	410	A	-1.7
A	L	829	A	-1.69
A	Y	521	A	-1.68
A	F	77	A	-1.67
A	V	204	A	-1.67
A	V	820	A	-1.67
A	D	377	A	-1.66
A	F	843	A	-1.66
A	H	256	A	-1.65
A	I	266	A	-1.65
A	C	310	A	-1.65
A	V	373	A	-1.65
A	R	331	A	-1.64
A	V	335	A	-1.64
A	R	349	A	-1.64
A	C	395	A	-1.64
A	W	916	A	-1.61
A	N	168	A	-1.59
A	L	775	A	-1.59
A	H	810	A	-1.59
A	I	847	A	-1.57
A	T	393	A	-1.56
A	I	488	A	-1.56
A	V	720	A	-1.56
A	F	283	A	-1.55
A	V	495	A	-1.54
A	R	624	A	-1.54
A	P	832	A	-1.54
A	Y	32	A	-1.52
A	T	123	A	-1.52
A	I	106	A	-1.51
A	P	537	A	-1.5
A	V	844	A	-1.5
A	D	851	A	-1.5
A	M	855	A	-1.49
A	V	860	A	-1.49
A	Y	265	A	-1.48
A	L	437	A	-1.48
A	N	314	A	-1.47
A	V	233	A	-1.44
A	H	642	A	-1.43
A	C	765	A	-1.43
A	R	55	A	-1.42
A	H	133	A	-1.42
A	V	338	A	-1.42
A	R	197	A	-1.41
A	V	435	A	-1.4
A	N	489	A	-1.4
A	R	74	A	-1.39
A	I	223	A	-1.39
A	C	12	A	-1.38
A	C	54	A	-1.38
A	T	248	A	-1.38
A	R	726	A	-1.38
A	N	791	A	-1.38
A	Y	156	A	-1.37
A	C	193	A	-1.36
A	T	710	A	-1.36
A	V	174	A	-1.35
A	L	648	A	-1.35
A	Q	210	A	-1.34
A	P	296	A	-1.34
A	V	662	A	-1.34
A	N	705	A	-1.34
A	H	725	A	-1.34
A	P	412	A	-1.33
A	V	675	A	-1.33
A	V	742	A	-1.33
A	T	582	A	-1.32
A	N	611	A	-1.3
A	K	676	A	-1.3
A	P	834	A	-1.3
A	M	110	A	-1.29
A	M	380	A	-1.29
A	N	552	A	-1.29
A	T	680	A	-1.29
A	I	494	A	-1.28
A	C	622	A	-1.28
A	H	613	A	-1.27
A	R	651	A	-1.27
A	R	183	A	-1.26
A	V	190	A	-1.26
A	T	531	A	-1.26
A	V	560	A	-1.26
A	C	659	A	-1.25
A	H	872	A	-1.24
A	R	285	A	-1.23
A	T	344	A	-1.23
A	V	31	A	-1.22
A	K	783	A	-1.21
A	V	359	A	-1.2
A	N	414	A	-1.19
A	Q	524	A	-1.19
A	V	231	A	-1.18
A	T	817	A	-1.18
A	F	920	A	-1.18
A	H	75	A	-1.15
A	W	290	A	-1.15
A	C	697	A	-1.15
A	I	579	A	-1.13
A	C	93	A	-1.11
A	R	132	A	-1.11
A	H	650	A	-1.11
A	C	563	A	-1.1
A	C	669	A	-1.1
A	L	907	A	-1.1
A	T	120	A	-1.09
A	G	179	A	-1.09
A	V	315	A	-1.09
A	P	505	A	-1.09
A	R	889	A	-1.09
A	R	392	A	-1.08
A	N	691	A	-1.08
A	C	799	A	-1.08
A	D	303	A	-1.07
A	R	569	A	-1.07
A	C	646	A	-1.07
A	R	721	A	-1.07
A	D	126	A	-1.06
A	P	232	A	-1.06
A	P	328	A	-1.06
A	F	440	A	-1.06
A	R	513	A	-1.05
A	R	836	A	-1.05
A	C	22	A	-1.04
A	V	111	A	-1.03
A	D	194	A	-1.03
A	G	345	A	-1.03
A	D	390	A	-1.03
A	T	540	A	-1.03
A	T	591	A	-1.02
A	V	257	A	-1.01
A	T	853	A	-1
A	L	931	A	-1
A	V	42	A	-0.99
A	C	53	A	-0.99
A	K	73	A	-0.99
A	N	215	A	-0.99
A	V	320	A	-0.98
A	T	556	A	-0.98
A	N	64	A	-0.97
A	N	209	A	-0.96
A	D	525	A	-0.96
A	Q	570	A	-0.96
A	D	711	A	-0.96
A	G	230	A	-0.95
A	N	52	A	-0.94
A	D	60	A	-0.94
A	T	141	A	-0.94
A	C	152	A	-0.94
A	P	112	A	-0.93
A	Y	595	A	-0.93
A	P	627	A	-0.92
A	N	781	A	-0.92
A	V	11	A	-0.91
A	P	620	A	-0.91
A	D	164	A	-0.89
A	D	846	A	-0.89
A	H	892	A	-0.89
A	K	417	A	-0.88
A	H	439	A	-0.88
A	L	576	A	-0.88
A	T	76	A	-0.87
A	N	628	A	-0.86
A	D	833	A	-0.86
A	V	147	A	-0.85
A	V	299	A	-0.85
A	S	343	A	-0.84
A	R	533	A	-0.84
A	R	583	A	-0.83
A	H	599	A	-0.83
A	V	737	A	-0.83
A	P	322	A	-0.82
A	R	33	A	-0.81
A	R	305	A	-0.8
A	G	503	A	-0.8
A	N	874	A	-0.8
A	L	302	A	-0.79
A	T	409	A	-0.79
A	E	658	A	-0.78
A	C	730	A	-0.78
A	N	734	A	-0.78
A	G	774	A	-0.77
A	R	18	A	-0.76
A	D	211	A	-0.75
A	G	485	A	-0.75
A	K	532	A	-0.75
A	S	647	A	-0.75
A	S	367	A	-0.73
A	R	457	A	-0.73
A	D	717	A	-0.73
A	H	928	A	-0.73
A	D	684	A	-0.72
A	D	738	A	-0.72
A	V	424	A	-0.71
A	G	214	A	-0.7
A	S	754	A	-0.69
A	T	567	A	-0.68
A	K	621	A	-0.68
A	T	686	A	-0.68
A	P	868	A	-0.68
A	Q	444	A	-0.67
A	T	28	A	-0.66
A	K	121	A	-0.66
A	G	203	A	-0.65
A	T	246	A	-0.65
A	R	249	A	-0.65
A	Q	661	A	-0.65
A	P	677	A	-0.65
A	R	10	A	-0.64
A	P	21	A	-0.64
A	G	44	A	-0.64
A	C	139	A	-0.64
A	M	906	A	-0.64
A	T	20	A	-0.63
A	G	597	A	-0.63
A	S	635	A	-0.63
A	C	842	A	-0.63
A	T	24	A	-0.62
A	G	200	A	-0.62
A	N	213	A	-0.61
A	G	852	A	-0.61
A	G	352	A	-0.6
A	N	403	A	-0.6
A	G	841	A	-0.6
A	E	83	A	-0.59
A	D	260	A	-0.59
A	V	30	A	-0.58
A	S	664	A	-0.58
A	S	672	A	-0.58
A	R	735	A	-0.58
A	R	858	A	-0.58
A	K	47	A	-0.57
A	Q	468	A	-0.57
A	T	538	A	-0.57
A	G	671	A	-0.57
A	V	880	A	-0.57
A	H	82	A	-0.56
A	D	452	A	-0.56
A	K	511	A	-0.55
A	G	712	A	-0.55
A	G	839	A	-0.55
A	K	332	A	-0.54
A	N	543	A	-0.54
A	G	486	A	-0.53
A	R	555	A	-0.53
A	C	298	A	-0.52
A	C	813	A	-0.52
A	T	259	A	-0.51
A	H	355	A	-0.51
A	T	604	A	-0.51
A	G	670	A	-0.51
A	Y	867	A	-0.5
A	Q	573	A	-0.49
A	S	795	A	-0.49
A	S	68	A	-0.48
A	T	148	A	-0.48
A	G	327	A	-0.48
A	G	385	A	-0.48
A	T	912	A	-0.48
A	Q	57	A	-0.47
A	E	144	A	-0.47
A	N	600	A	-0.47
A	N	909	A	-0.47
A	T	206	A	-0.46
A	T	462	A	-0.46
A	G	616	A	-0.46
A	T	701	A	-0.46
A	T	926	A	-0.46
A	K	143	A	-0.45
A	P	378	A	-0.45
A	V	557	A	-0.45
A	S	692	A	-0.45
A	E	254	A	-0.44
A	D	358	A	-0.44
A	H	381	A	-0.44
A	S	501	A	-0.44
A	D	100	A	-0.43
A	R	173	A	-0.43
A	N	695	A	-0.43
A	S	433	A	-0.42
A	P	809	A	-0.42
A	K	593	A	-0.41
A	K	890	A	-0.41
A	H	295	A	-0.39
A	N	404	A	-0.39
A	S	520	A	-0.39
A	P	243	A	-0.38
A	T	565	A	-0.38
A	G	13	A	-0.37
A	N	39	A	-0.37
A	D	218	A	-0.37
A	E	370	A	-0.37
A	G	510	A	-0.37
A	T	896	A	-0.36
A	C	151	A	-0.35
A	E	180	A	-0.35
A	K	272	A	-0.35
A	S	561	A	-0.35
A	D	761	A	-0.35
A	E	729	A	-0.34
A	K	59	A	-0.33
A	T	252	A	-0.33
A	N	497	A	-0.33
A	D	879	A	-0.33
A	G	584	A	-0.32
A	P	339	A	-0.31
A	T	687	A	-0.31
A	S	759	A	-0.31
A	T	226	A	-0.3
A	S	325	A	-0.3
A	M	615	A	-0.3
A	D	804	A	-0.3
A	T	324	A	-0.29
A	S	549	A	-0.29
A	R	105	A	-0.28
A	T	225	A	-0.28
A	G	228	A	-0.28
A	Q	724	A	-0.28
A	S	784	A	-0.28
A	D	67	A	-0.27
A	D	454	A	-0.27
A	Q	815	A	-0.27
A	S	835	A	-0.27
A	P	918	A	-0.27
A	Q	117	A	-0.26
A	T	319	A	-0.26
A	E	665	A	-0.26
A	K	807	A	-0.26
A	P	830	A	-0.26
A	G	25	A	-0.25
A	R	181	A	-0.25
A	K	369	A	-0.25
A	T	394	A	-0.25
A	T	801	A	-0.25
A	T	276	A	-0.24
A	S	397	A	-0.24
A	Q	698	A	-0.24
A	D	135	A	-0.23
A	N	496	A	-0.23
A	S	229	A	-0.22
A	G	590	A	-0.22
A	K	849	A	-0.21
A	G	108	A	-0.2
A	M	902	A	-0.2
A	S	115	A	-0.19
A	N	177	A	-0.19
A	D	274	A	-0.19
A	N	507	A	-0.19
A	K	574	A	-0.19
A	R	750	A	-0.19
A	P	927	A	-0.19
A	G	23	A	-0.18
A	R	118	A	-0.18
A	K	263	A	-0.18
A	G	427	A	-0.18
A	R	640	A	-0.18
A	G	683	A	-0.18
A	D	29	A	-0.17
A	E	84	A	-0.17
A	T	402	A	-0.17
A	D	421	A	-0.17
A	E	474	A	-0.17
A	S	239	A	-0.16
A	R	365	A	-0.16
A	N	722	A	-0.16
A	K	871	A	-0.16
A	T	908	A	-0.16
A	E	922	A	-0.16
A	S	236	A	-0.15
A	N	360	A	-0.15
A	K	391	A	-0.15
A	N	447	A	-0.15
A	S	861	A	-0.15
A	D	235	A	-0.14
A	P	461	A	-0.14
A	K	478	A	-0.14
A	D	893	A	-0.14
A	T	51	A	-0.12
A	E	58	A	-0.12
A	E	278	A	-0.12
A	N	386	A	-0.12
A	S	681	A	-0.12
A	S	904	A	-0.12
A	D	336	A	-0.11
A	E	802	A	-0.11
A	T	643	A	-0.1
A	S	709	A	-0.1
A	D	153	A	-0.09
A	S	318	A	-0.09
A	K	411	A	-0.09
A	T	293	A	-0.08
A	R	733	A	-0.08
A	Q	789	A	-0.08
A	N	79	A	-0.07
A	Q	408	A	-0.07
A	D	499	A	-0.07
A	G	808	A	-0.07
A	Q	191	A	-0.06
A	P	323	A	-0.06
A	C	482	A	-0.06
A	S	27	A	-0.05
A	P	169	A	-0.05
A	Q	184	A	-0.05
A	G	337	A	-0.05
A	E	436	A	-0.05
A	K	500	A	-0.05
A	S	778	A	-0.05
A	E	796	A	-0.05
A	K	103	A	-0.04
A	P	227	A	-0.04
A	D	269	A	-0.04
A	G	446	A	-0.04
A	T	803	A	-0.04
A	H	898	A	-0.04
A	E	917	A	-0.04
A	V	930	A	-0.04
A	K	438	A	-0.03
A	K	551	A	-0.03
A	K	641	A	-0.03
A	N	743	A	-0.03
A	Q	357	A	-0.02
A	H	816	A	-0.02
A	E	876	A	-0.02
A	K	288	A	-0.01
A	Q	292	A	-0.01
A	E	350	A	-0.01
A	S	451	A	-0.01
A	S	592	A	-0.01
A	P	612	A	-0.01
A	T	739	A	-0.01
A	K	798	A	-0.01
A	K	50	A	0
A	N	88	A	0
A	P	264	A	0
A	E	277	A	0
A	K	281	A	0
A	S	607	A	0
A	N	713	A	0
A	R	914	A	0
A	S	15	A	0.01
A	N	198	A	0.01
A	S	364	A	0.01
A	Q	492	A	0.01
A	K	577	A	0.01
A	E	857	A	0.01
A	E	894	A	0.01
A	K	41	A	0.02
A	Q	81	A	0.02
A	D	109	A	0.02
A	G	137	A	0.02
A	H	362	A	0.02
A	S	682	A	0.02
A	Q	886	A	0.02
A	V	14	A	0.03
A	N	138	A	0.03
A	D	291	A	0.03
A	N	300	A	0.03
A	S	578	A	0.03
A	D	608	A	0.03
A	T	644	A	0.03
A	Q	822	A	0.03
A	T	929	A	0.03
A	N	9	A	0.04
A	E	167	A	0.04
A	K	267	A	0.04
A	S	425	A	0.04
A	S	649	A	0.04
A	K	718	A	0.04
A	S	768	A	0.04
A	D	865	A	0.04
A	Q	5	A	0.05
A	N	150	A	0.05
A	K	430	A	0.05
A	K	545	A	0.05
A	S	814	A	0.05
A	K	821	A	0.05
A	T	870	A	0.05
A	K	91	A	0.06
A	N	491	A	0.06
A	S	772	A	0.06
A	Q	773	A	0.06
A	T	806	A	0.06
A	Q	932	A	0.06
A	D	63	A	0.07
A	K	426	A	0.07
A	E	431	A	0.07
A	S	518	A	0.07
A	R	553	A	0.07
A	E	610	A	0.07
A	D	740	A	0.07
A	K	751	A	0.07
A	K	780	A	0.07
A	E	919	A	0.07
A	S	6	A	0.08
A	T	26	A	0.08
A	D	92	A	0.08
A	D	161	A	0.08
A	S	363	A	0.08
A	T	586	A	0.08
A	K	714	A	0.08
A	D	845	A	0.08
A	D	3	A	0.09
A	S	78	A	0.09
A	T	85	A	0.09
A	N	158	A	0.09
A	T	262	A	0.09
A	S	384	A	0.09
A	D	484	A	0.09
A	E	811	A	0.09
A	D	910	A	0.09
A	P	94	A	0.1
A	S	434	A	0.1
A	K	603	A	0.1
A	K	98	A	0.11
A	D	140	A	0.11
A	K	159	A	0.11
A	G	679	A	0.12
A	D	40	A	0.13
A	K	160	A	0.13
A	D	258	A	0.13
A	Q	541	A	0.13
A	D	36	A	0.14
A	D	221	A	0.14
A	G	432	A	0.14
A	K	508	A	0.14
A	D	618	A	0.14
A	D	107	A	0.15
A	N	911	A	0.15
A	G	823	A	0.16
A	Q	224	A	0.17
A	D	523	A	0.17
A	G	897	A	0.17
A	E	61	A	0.18
A	G	678	A	0.18
A	D	517	A	0.2
A	D	736	A	0.2
A	E	136	A	0.22
A	P	873	A	0.22
A	D	901	A	0.22
A	D	154	A	0.23
A	K	188	A	0.23
A	S	255	A	0.24
A	H	309	A	0.25
A	G	413	A	0.25
A	E	744	A	0.25
A	G	220	A	0.27
A	D	284	A	0.27
A	E	522	A	0.3
A	S	913	A	0.3
A	D	155	A	0.31
A	Q	875	A	0.31
A	D	208	A	0.34
A	D	418	A	0.36
A	T	850	A	0.36
A	D	825	A	0.37
A	D	824	A	0.38
A	D	62	A	0.39
A	D	445	A	0.44
A	D	760	A	0.45
A	D	170	A	0.5
A	D	481	A	0.5
A	D	623	A	0.5
A	G	596	A	0.55
A	H	882	A	0.55
A	T	769	A	0.58
A	D	304	A	0.62
A	G	559	A	0.64
A	S	564	A	0.71
A	D	477	A	0.73

## Sheet: complete B chain
Chain	Native Sequennce	Position	Mutant Sequence	Delta Delta G		Number of Residues	Percentage
B	M	1019	A	-3.25	Destabilizing	130	76.5
B	L	1035	A	-2.96	Stabilizing	40	23.5
B	L	1116	A	-2.91
B	I	1064	A	-2.8
B	L	1030	A	-2.79
B	L	1027	A	-2.78
B	L	1049	A	-2.73
B	L	970	A	-2.7
B	I	1117	A	-2.7
B	M	1061	A	-2.66
B	Y	1070	A	-2.62
B	Y	1067	A	-2.56
B	F	947	A	-2.48
B	I	1051	A	-2.46
B	I	1088	A	-2.46
B	L	1023	A	-2.44
B	W	1086	A	-2.44
B	L	1054	A	-2.42
B	V	1091	A	-2.4
B	L	974	A	-2.35
B	I	1104	A	-2.3
B	V	1062	A	-2.25
B	Y	1003	A	-2.22
B	L	1060	A	-2.21
B	V	1118	A	-2.2
B	V	1063	A	-2.19
B	Y	954	A	-2.18
B	I	1038	A	-2.17
B	I	1052	A	-2.17
B	I	1039	A	-2.16
B	L	1112	A	-2.15
B	L	967	A	-2.14
B	F	1024	A	-2.14
B	V	1047	A	-2.13
B	L	1121	A	-2.13
B	V	1092	A	-2.11
B	V	1099	A	-2.08
B	L	1129	A	-2.03
B	Y	1081	A	-1.96
B	M	1022	A	-1.92
B	L	1101	A	-1.89
B	L	941	A	-1.81
B	W	1114	A	-1.8
B	L	1085	A	-1.79
B	C	1046	A	-1.76
B	M	1002	A	-1.72
B	F	981	A	-1.69
B	L	991	A	-1.69
B	F	1079	A	-1.64
B	R	1122	A	-1.61
B	M	999	A	-1.57
B	Y	944	A	-1.56
B	M	987	A	-1.5
B	M	994	A	-1.48
B	I	1098	A	-1.41
B	V	1015	A	-1.38
B	F	938	A	-1.33
B	P	1048	A	-1.33
B	V	1127	A	-1.25
B	P	1053	A	-1.2
B	M	1026	A	-1.18
B	P	1065	A	-1.16
B	D	1044	A	-1.07
B	C	1074	A	-1.03
B	P	1115	A	-1.02
B	D	1093	A	-0.92
B	G	1045	A	-0.91
B	R	1012	A	-0.87
B	N	1050	A	-0.82
B	V	966	A	-0.79
B	N	1036	A	-0.79
B	R	989	A	-0.78
B	R	1043	A	-0.65
B	R	1007	A	-0.62
B	T	1056	A	-0.62
B	T	1078	A	-0.62
B	M	1106	A	-0.61
B	D	1066	A	-0.56
B	S	1105	A	-0.55
B	T	1119	A	-0.54
B	E	1087	A	-0.5
B	T	1055	A	-0.44
B	R	983	A	-0.41
B	T	1069	A	-0.4
B	T	1073	A	-0.4
B	S	1008	A	-0.39
B	S	963	A	-0.37
B	T	1016	A	-0.35
B	E	955	A	-0.33
B	D	1031	A	-0.33
B	G	1076	A	-0.3
B	Q	1089	A	-0.3
B	D	1010	A	-0.29
B	V	958	A	-0.25
B	K	1011	A	-0.25
B	D	962	A	-0.23
B	Q	1020	A	-0.23
B	I	934	A	-0.2
B	N	1032	A	-0.2
B	Q	1090	A	-0.18
B	K	990	A	-0.17
B	E	992	A	-0.17
B	K	1059	A	-0.17
B	T	1000	A	-0.16
B	G	961	A	-0.12
B	S	973	A	-0.12
B	D	982	A	-0.12
B	Q	951	A	-0.11
B	S	1017	A	-0.1
B	S	936	A	-0.09
B	T	1021	A	-0.09
B	S	939	A	-0.07
B	T	1077	A	-0.06
B	N	960	A	-0.05
B	T	949	A	-0.04
B	E	1009	A	-0.04
B	V	976	A	-0.03
B	S	979	A	-0.03
B	R	1028	A	-0.03
B	K	1071	A	-0.03
B	E	1103	A	-0.03
B	N	1124	A	-0.03
B	K	1014	A	-0.02
B	N	1040	A	-0.02
B	D	1095	A	-0.02
B	K	978	A	-0.01
B	D	996	A	-0.01
B	Q	1001	A	-0.01
B	K	1004	A	-0.01
B	T	1080	A	-0.01
B	Q	956	A	0
B	K	968	A	0
B	K	993	A	0
B	Q	1100	A	0
B	P	942	A	0.01
B	E	952	A	0.01
B	V	965	A	0.01
B	K	969	A	0.01
B	S	940	A	0.02
B	S	943	A	0.02
B	K	971	A	0.02
B	Q	997	A	0.02
B	Q	1005	A	0.02
B	N	1068	A	0.02
B	E	964	A	0.03
B	N	975	A	0.03
B	K	1029	A	0.03
B	E	980	A	0.05
B	S	1083	A	0.05
B	D	1107	A	0.05
B	S	1109	A	0.05
B	P	1110	A	0.05
B	K	1128	A	0.05
B	D	984	A	0.06
B	S	1102	A	0.06
B	Q	1130	A	0.06
B	T	1025	A	0.08
B	E	937	A	0.09
B	N	1111	A	0.09
B	Q	988	A	0.1
B	N	1041	A	0.1
B	N	1108	A	0.1
B	S	1125	A	0.11
B	N	1037	A	0.12
B	S	1096	A	0.12
B	K	972	A	0.14
B	D	1075	A	0.18
B	N	1072	A	0.19
B	K	1097	A	0.2
B	D	1033	A	0.52

## Sheet: complete C chain
Chain	Native Sequennce	Position	Mutant Sequence	Delta Delta G		Number of Residues	Percentage
C	L	1147	A	-3.37	Destabilizing	63	80.8
C	W	1159	A	-3.21	Stabilizing	15	19.2
C	L	1186	A	-3.09
C	L	1189	A	-2.99
C	L	1185	A	-2.98
C	F	1179	A	-2.93
C	L	1144	A	-2.84
C	L	1201	A	-2.83
C	L	1143	A	-2.8
C	L	1150	A	-2.68
C	L	1158	A	-2.61
C	L	1190	A	-2.57
C	L	1165	A	-2.54
C	L	1170	A	-2.5
C	I	1169	A	-2.37
C	M	1182	A	-2.31
C	V	1141	A	-2.12
C	I	1198	A	-2.07
C	V	1142	A	-2.06
C	M	1133	A	-1.98
C	V	1146	A	-1.96
C	V	1136	A	-1.84
C	V	1188	A	-1.82
C	T	1139	A	-1.7
C	V	1183	A	-1.7
C	L	1206	A	-1.69
C	M	1192	A	-1.61
C	L	1171	A	-1.51
C	V	1152	A	-1.43
C	L	1212	A	-1.4
C	V	1196	A	-1.35
C	V	1163	A	-1.33
C	D	1135	A	-1.21
C	D	1197	A	-1.15
C	C	1138	A	-1.12
C	N	1199	A	-0.96
C	N	1167	A	-0.92
C	C	1162	A	-0.78
C	K	1137	A	-0.76
C	H	1166	A	-0.75
C	K	1181	A	-0.68
C	S	1191	A	-0.61
C	S	1131	A	-0.46
C	S	1155	A	-0.44
C	S	1187	A	-0.42
C	S	1184	A	-0.32
C	N	1208	A	-0.31
C	Q	1148	A	-0.28
C	T	1211	A	-0.25
C	E	1153	A	-0.21
C	S	1140	A	-0.18
C	Q	1149	A	-0.18
C	C	1202	A	-0.18
C	R	1151	A	-0.15
C	T	1176	A	-0.14
C	S	1145	A	-0.13
C	Q	1213	A	-0.11
C	D	1174	A	-0.1
C	S	1134	A	-0.09
C	Q	1161	A	-0.07
C	G	1194	A	-0.05
C	K	1200	A	-0.05
C	E	1180	A	-0.02
C	Q	1164	A	0
C	K	1132	A	0.01
C	S	1154	A	0.01
C	K	1173	A	0.02
C	T	1175	A	0.02
C	S	1156	A	0.05
C	K	1157	A	0.05
C	Q	1193	A	0.06
C	E	1177	A	0.09
C	D	1168	A	0.11
C	M	1205	A	0.19
C	E	1204	A	0.23
C	E	1203	A	0.25
C	D	1207	A	0.37
C	R	1209	A	0.49

## Sheet: complete D chain
Chain	Native Sequennce	Position	Mutant Sequence	Delta Delta G		Number of Residues	Percentage
D	Y	1284	A	-3.25	Destabilizing	140	82.4
D	L	1316	A	-3.14	Stabilizing	30	17.6
D	F	1305	A	-3.09
D	I	1345	A	-3.05
D	Y	1235	A	-2.97
D	L	1304	A	-2.94
D	L	1308	A	-2.93
D	L	1397	A	-2.93
D	Y	1225	A	-2.92
D	M	1307	A	-2.84
D	I	1369	A	-2.81
D	Y	1351	A	-2.8
D	I	1398	A	-2.79
D	I	1319	A	-2.78
D	F	1228	A	-2.69
D	Y	1348	A	-2.68
D	V	1372	A	-2.68
D	L	1311	A	-2.67
D	L	1251	A	-2.57
D	I	1385	A	-2.57
D	L	1330	A	-2.55
D	L	1248	A	-2.52
D	L	1393	A	-2.52
D	L	1255	A	-2.5
D	M	1300	A	-2.48
D	I	1333	A	-2.47
D	M	1303	A	-2.46
D	I	1320	A	-2.46
D	W	1367	A	-2.41
D	V	1399	A	-2.41
D	F	1262	A	-2.37
D	L	1341	A	-2.28
D	L	1382	A	-2.27
D	V	1380	A	-2.23
D	V	1343	A	-2.17
D	I	1332	A	-2.14
D	Y	1362	A	-2.13
D	V	1373	A	-2.04
D	N	1313	A	-2.02
D	M	1280	A	-1.98
D	C	1327	A	-1.93
D	L	1222	A	-1.89
D	L	1272	A	-1.86
D	R	1403	A	-1.83
D	R	1324	A	-1.82
D	V	1328	A	-1.79
D	M	1342	A	-1.79
D	M	1268	A	-1.71
D	V	1344	A	-1.71
D	L	1402	A	-1.7
D	L	1366	A	-1.69
D	F	1360	A	-1.65
D	W	1395	A	-1.65
D	I	1215	A	-1.62
D	I	1379	A	-1.59
D	L	1335	A	-1.58
D	M	1275	A	-1.57
D	V	1296	A	-1.52
D	P	1329	A	-1.52
D	N	1317	A	-1.43
D	N	1318	A	-1.29
D	T	1400	A	-1.19
D	D	1347	A	-1.16
D	T	1350	A	-1.12
D	P	1396	A	-1.09
D	R	1270	A	-1.07
D	M	1283	A	-1.04
D	N	1322	A	-1.04
D	F	1219	A	-1.02
D	T	1281	A	-0.96
D	C	1355	A	-0.95
D	R	1288	A	-0.94
D	R	1309	A	-0.87
D	T	1359	A	-0.85
D	S	1386	A	-0.85
D	M	1387	A	-0.85
D	R	1293	A	-0.81
D	V	1408	A	-0.81
D	N	1331	A	-0.79
D	T	1306	A	-0.76
D	T	1337	A	-0.63
D	Q	1269	A	-0.58
D	G	1326	A	-0.58
D	R	1264	A	-0.56
D	P	1346	A	-0.55
D	V	1247	A	-0.53
D	D	1374	A	-0.53
D	T	1354	A	-0.49
D	N	1256	A	-0.47
D	T	1336	A	-0.41
D	V	1239	A	-0.38
D	E	1273	A	-0.35
D	T	1230	A	-0.33
D	K	1285	A	-0.33
D	K	1292	A	-0.33
D	E	1368	A	-0.3
D	N	1349	A	-0.29
D	S	1244	A	-0.28
D	D	1265	A	-0.26
D	Q	1301	A	-0.26
D	D	1312	A	-0.25
D	K	1252	A	-0.21
D	K	1259	A	-0.21
D	T	1361	A	-0.2
D	E	1218	A	-0.19
D	Q	1232	A	-0.19
D	D	1291	A	-0.19
D	V	1246	A	-0.18
D	S	1254	A	-0.17
D	Q	1371	A	-0.17
D	L	1410	A	-0.17
D	K	1310	A	-0.16
D	N	1321	A	-0.16
D	G	1242	A	-0.15
D	P	1391	A	-0.14
D	K	1253	A	-0.09
D	K	1271	A	-0.09
D	D	1325	A	-0.09
D	N	1389	A	-0.09
D	T	1302	A	-0.08
D	P	1334	A	-0.08
D	K	1295	A	-0.07
D	E	1236	A	-0.06
D	Q	1286	A	-0.06
D	K	1340	A	-0.06
D	E	1233	A	-0.05
D	N	1405	A	-0.05
D	V	1257	A	-0.04
D	D	1263	A	-0.03
D	K	1274	A	-0.03
D	Q	1370	A	-0.03
D	E	1290	A	-0.02
D	T	1358	A	-0.02
D	S	1390	A	-0.02
D	S	1406	A	-0.02
D	K	1250	A	-0.01
D	S	1260	A	-0.01
D	S	1289	A	-0.01
D	S	1377	A	-0.01
D	Q	1411	A	-0.01
D	S	1220	A	0
D	Q	1237	A	0
D	K	1352	A	0
D	G	1357	A	0
D	T	1297	A	0.01
D	S	1221	A	0.02
D	Q	1278	A	0.02
D	K	1378	A	0.02
D	E	1384	A	0.02
D	N	1392	A	0.02
D	P	1223	A	0.03
D	S	1224	A	0.03
D	K	1249	A	0.03
D	Q	1381	A	0.03
D	E	1245	A	0.04
D	Q	1282	A	0.04
D	S	1364	A	0.05
D	D	1388	A	0.05
D	S	1217	A	0.06
D	N	1241	A	0.06
D	K	1409	A	0.06
D	S	1383	A	0.07
D	N	1353	A	0.08
D	S	1298	A	0.1
D	D	1243	A	0.12
D	D	1314	A	0.12
D	D	1376	A	0.12
D	D	1356	A	0.15
D	E	1261	A	0.17
D	D	1277	A	0.17

## Sheet: Both B and D Chain
mutations	average_distance	single_predictions	sum_single_predictions	ddmut_prediction	prediction_reverse		Number of Residues	Percentage
B W1086A;D W1367A	51.68	-2.43;-2.41	-4.84	-4.46	5.31	Destabilizing	92	48.4
B Y1067A;D Y1348A	44.91	-2.56;-2.68	-5.24	-4.17	3.65	Stabilizing	80	42.1
B F947A;D F1228A	26.61	-2.49;-2.69	-5.18	-4.1	3.35
B Y944A;D Y1225A	27.86	-1.56;-2.92	-4.48	-3.51	3.58	Note: B-chain numbering corresponds to AA residue position minus 932 while D-chain numbering corresponds AA residue poosition minus 1213 .
B Y1081A;D Y1362A	53.63	-1.95;-2.15	-4.1	-3.31	3.89	Example: B W1086A; D W1367A is W154 of nsp8.
B Y1070A;D Y1351A	46.1	-2.62;-2.8	-5.42	-3.26	2.89
B V1091A;D V1372A	36.55	-2.39;-2.68	-5.07	-3.18	3.02
B F1079A;D F1360A	52.26	-1.64;-1.65	-3.29	-3.15	3.42
B F1024A;D F1305A	55.94	-2.14;-3.09	-5.23	-3.06	1.54
B V1062A;D V1343A	39.41	-2.25;-2.17	-4.42	-2.87	2.81
B L1060A;D L1341A	41.97	-2.2;-2.28	-4.48	-2.79	2.65
B V1092A;D V1373A	32.6	-2.11;-2.02	-4.13	-2.71	2
B M1061A;D M1342A	38.94	-2.66;-1.79	-4.45	-2.67	3.2
B P1065A;D P1346A	40.86	-1.16;-0.55	-1.71	-2.67	1.57
B Y954A;D Y1235A	24.41	-2.18;-2.97	-5.15	-2.64	2.75
B V1099A;D V1380A	33.68	-2.08;-2.23	-4.31	-2.61	2.52
B F938A;D F1219A	27.87	-1.33;-0.97	-2.3	-2.59	2.63
B F981A;D F1262A	25.42	-1.69;-2.37	-4.06	-2.5	2.63
B V1118A;D V1399A	38.77	-2.2;-2.41	-4.61	-2.45	2.48
B Y1003A;D Y1284A	31.92	-2.22;-3.25	-5.47	-2.4	2.04
B R1122A;D R1403A	52.4	-1.71;-1.83	-3.54	-2.1	1.97
B M1019A;D M1300A	43.63	-3.23;-2.48	-5.71	-2.07	1.69
B V1063A;D V1344A	38.51	-2.19;-1.73	-3.92	-1.98	1.67
B L1049A;D L1330A	52.48	-2.73;-2.55	-5.28	-1.96	1.4
B M1026A;D M1307A	54.14	-1.18;-2.84	-4.02	-1.94	2.43
B I1051A;D I1332A	48.34	-2.48;-2.12	-4.6	-1.9	1.79
B V1047A;D V1328A	63.38	-2.13;-1.79	-3.92	-1.86	0.47
B L1116A;D L1397A	35.57	-2.91;-2.93	-5.84	-1.69	1.22
B I1052A;D I1333A	51.59	-2.17;-2.47	-4.64	-1.65	1.3
B L1030A;D L1311A	62.68	-2.79;-2.63	-5.42	-1.64	1.03
B I1064A;D I1345A	40.76	-2.8;-3.05	-5.85	-1.61	1.76
B I1104A;D I1385A	40.37	-2.3;-2.57	-4.87	-1.61	1.55
B W1114A;D W1395A	36.57	-1.8;-1.65	-3.45	-1.56	2.46
B M987A;D M1268A	26.03	-1.5;-1.71	-3.21	-1.53	2.72
B M999A;D M1280A	30.97	-1.57;-1.98	-3.55	-1.53	2.76
B I1088A;D I1369A	45.21	-2.46;-2.81	-5.27	-1.51	1.45
B L1027A;D L1308A	58.55	-2.79;-2.97	-5.76	-1.47	1.16
B M1022A;D M1303A	47.97	-1.92;-2.48	-4.4	-1.39	2.13
B E1087A;D E1368A	49.73	-0.5;-0.3	-0.8	-1.36	0.78
B L974A;D L1255A	22.08	-2.35;-2.5	-4.85	-1.34	0.79
B L1101A;D L1382A	40.3	-1.89;-2.27	-4.16	-1.27	0.21
B L1054A;D L1335A	48.55	-2.42;-1.58	-4	-1.25	0.61
B I1117A;D I1398A	35.48	-2.7;-2.79	-5.49	-1.17	0.67
B D1066A;D D1347A	43.54	-0.56;-1.16	-1.72	-1.07	0.83
B P1048A;D P1329A	57.83	-1.49;-1.52	-3.01	-1.06	1.59
B V1127A;D V1408A	60.3	-1.25;-0.81	-2.06	-1.06	1.04
B L1112A;D L1393A	33.88	-2.19;-2.52	-4.71	-1.03	0.98
B M1002A;D M1283A	31.15	-1.72;-1.04	-2.76	-0.98	2.09
B L1035A;D L1316A	65.06	-2.96;-3.14	-6.1	-0.98	0.46
B C1074A;D C1355A	49.58	-1.03;-0.95	-1.98	-0.96	1.2
B T1073A;D T1354A	50.51	-0.4;-0.49	-0.89	-0.85	1.09
B L967A;D L1248A	19.9	-2.14;-2.52	-4.66	-0.81	0.5
B V1015A;D V1296A	37.22	-1.38;-1.52	-2.9	-0.79	0.61
B L970A;D L1251A	21.37	-2.7;-2.57	-5.27	-0.73	0.71
B T1119A;D T1400A	39.69	-0.54;-1.19	-1.73	-0.72	0.92
B M994A;D M1275A	27.31	-1.48;-1.57	-3.05	-0.69	1.56
B P1110A;D P1391A	38.52	0.05;-0.14	-0.09	-0.69	0.43
B R1012A;D R1293A	34.8	-0.87;-0.81	-1.68	-0.64	0.52
B L1085A;D L1366A	57.22	-1.79;-1.74	-3.53	-0.61	0.36
B D1044A;D D1325A	79.22	-1.07;-0.09	-1.16	-0.6	-0.01
B T1069A;D T1350A	47.95	-0.4;-1.12	-1.52	-0.6	0.64
B R1043A;D R1324A	76.67	-0.65;-1.82	-2.47	-0.56	0.05
B L1023A;D L1304A	50.71	-2.44;-2.87	-5.31	-0.55	0.36
B T1078A;D T1359A	52.61	-0.62;-0.85	-1.47	-0.55	1.03
B R989A;D R1270A	26.66	-0.78;-1.07	-1.85	-0.53	0.07
B E1103A;D E1384A	37.46	-0.03;0.02	-0.01	-0.49	0.7
B I1098A;D I1379A	31.91	-1.41;-1.59	-3	-0.46	0.75
B N1041A;D N1322A	74.77	0.1;-1.04	-0.94	-0.43	-0.12
B L941A;D L1222A	29.26	-1.81;-1.89	-3.7	-0.39	0.73
B P1115A;D P1396A	35.9	-1.02;-1.09	-2.11	-0.39	0.03
B Q951A;D Q1232A	25.41	-0.11;-0.17	-0.28	-0.38	0.25
B S1105A;D S1386A	43.29	-0.55;-0.85	-1.4	-0.33	0.58
B R1007A;D R1288A	32.92	-0.62;-0.94	-1.56	-0.26	0.08
B T949A;D T1230A	26.92	-0.04;-0.33	-0.37	-0.25	0.36
B R983A;D R1264A	24.51	-0.41;-0.56	-0.97	-0.23	0.08
B I1038A;D I1319A	67.45	-2.22;-2.78	-5	-0.23	0.39
B L1121A;D L1402A	47.66	-2.13;-1.8	-3.93	-0.22	0.93
B I1039A;D I1320A	69.42	-2.16;-2.46	-4.62	-0.21	0.43
B T1056A;D T1337A	55.06	-0.62;-0.63	-1.25	-0.16	0.47
B I934A;D I1215A	38.59	-0.2;-1.62	-1.82	-0.15	0.4
B N1037A;D N1318A	72.67	0.12;-1.29	-1.17	-0.15	-0.04
B G1045A;D G1326A	73.61	-0.91;-0.59	-1.5	-0.12	-0.18
B T1055A;D T1336A	51.69	-0.45;-0.44	-0.89	-0.09	0.22
B D962A;D D1243A	21.82	-0.23;0.12	-0.11	-0.08	-0.15
B L1129A;D L1410A	60.43	-2.03;-0.17	-2.2	-0.08	0.11
B R1028A;D R1309A	61.79	-0.03;-0.87	-0.9	-0.05	-0.01
B T1000A;D T1281A	29.69	-0.16;-0.96	-1.12	-0.04	0.24
B D1031A;D D1312A	66.94	-0.33;-0.25	-0.58	-0.04	-0.42
B P942A;D P1223A	30.97	0.01;0.03	0.04	-0.03	-0.15
B V966A;D V1247A	21.42	-0.78;-0.53	-1.31	-0.02	0.43
B Q988A;D Q1269A	27.41	0.1;-0.58	-0.48	0.01	0.28
B L991A;D L1272A	27.41	-1.69;-1.86	-3.55	0.02	0.09
B C1046A;D C1327A	70.11	-1.73;-1.99	-3.72	0.02	1.16
B E955A;D E1236A	24.28	-0.33;-0.06	-0.39	0.03	0.02
B G961A;D G1242A	21.84	-0.12;-0.15	-0.27	0.03	-1.11
B E992A;D E1273A	28.29	-0.17;-0.35	-0.52	0.03	0.03
B Q997A;D Q1278A	27.88	0.02;0.02	0.04	0.03	-0.03
B N1036A;D N1317A	71.95	-0.79;-1.43	-2.22	0.03	0
B D1010A;D D1291A	35.08	-0.29;-0.19	-0.48	0.04	-0.17
B K972A;D K1253A	20.22	0.14;-0.09	0.05	0.05	-0.38
B Q1001A;D Q1282A	29.02	-0.01;0.04	0.03	0.05	-0.07
B Q1005A;D Q1286A	30.98	0.02;-0.06	-0.04	0.05	-0.02
B N1032A;D N1313A	69.17	-0.2;-2.02	-2.22	0.05	0.02
B E1009A;D E1290A	33.64	-0.04;-0.02	-0.06	0.06	0.02
B T1016A;D T1297A	42.18	-0.35;0.01	-0.34	0.06	0.01
B E964A;D E1245A	18.05	0.03;0.04	0.07	0.07	-0.06
B Q1130A;D Q1411A	60.13	0.06;-0.01	0.05	0.07	-0.27
B T1021A;D T1302A	49.89	-0.09;-0.07	-0.16	0.08	-0.01
B P1053A;D P1334A	47.46	-1.27;-0.1	-1.37	0.08	-0.33
B T1025A;D T1306A	55.43	0.08;-0.76	-0.68	0.09	0
B E937A;D E1218A	29.6	0.09;-0.19	-0.1	0.1	-0.12
B G1076A;D G1357A	49.4	-0.3;-0.0	-0.3	0.1	-0.33
B Q956A;D Q1237A	24.94	-0.0;-0.0	0	0.11	-0.16
B V976A;D V1257A	22.09	-0.03;-0.04	-0.07	0.11	-0.33
B Q1020A;D Q1301A	49.05	-0.26;-0.26	-0.52	0.11	-0.08
B T1077A;D T1358A	49.58	-0.06;-0.02	-0.08	0.11	0.09
B S936A;D S1217A	36.42	-0.09;0.06	-0.03	0.12	-0.02
B K990A;D K1271A	25.8	-0.17;-0.09	-0.26	0.12	-0.03
B S1102A;D S1383A	40.41	0.06;0.07	0.13	0.12	0
B K969A;D K1250A	21.06	0.01;-0.01	0	0.17	-0.27
B N975A;D N1256A	20.24	0.03;-0.47	-0.44	0.17	-0.42
B E952A;D E1233A	25.89	0.01;-0.08	-0.07	0.18	-0.04
B D1093A;D D1374A	31.92	-0.92;-0.53	-1.45	0.18	0.56
B V965A;D V1246A	19.97	0.01;-0.23	-0.22	0.21	-0.43
B D1033A;D D1314A	72.25	0.17;0.11	0.28	0.21	-0.55
B S1017A;D S1298A	44.97	-0.1;0.1	0	0.22	-0.04
B T1080A;D T1361A	56.02	-0.01;-0.2	-0.21	0.22	-0.01
B K968A;D K1249A	19.1	0.0;0.03	0.03	0.24	-0.57
B D982A;D D1263A	23.98	-0.13;-0.03	-0.16	0.25	-0.09
B K1011A;D K1292A	34.48	-0.25;-0.33	-0.58	0.25	-0.34
B S1096A;D S1377A	29.43	0.12;-0.01	0.11	0.25	-0.73
B K978A;D K1259A	22.53	-0.01;-0.25	-0.26	0.26	-0.66
B K1029A;D K1310A	61.19	0.03;-0.16	-0.13	0.27	-0.29
B D1107A;D D1388A	43.12	0.05;0.05	0.1	0.28	-0.99
B Q1089A;D Q1370A	42.81	-0.3;-0.03	-0.33	0.29	-0.86
B E980A;D E1261A	24.62	0.05;0.17	0.22	0.3	0.5
B N1040A;D N1321A	76.25	-0.0;-0.16	-0.16	0.33	-0.03
B V958A;D V1239A	22.88	-0.25;-0.38	-0.63	0.34	-0.38
B K1128A;D K1409A	65.09	0.05;0.06	0.11	0.34	-0.97
B Q1090A;D Q1371A	38.58	-0.18;-0.17	-0.35	0.36	-0.7
B S963A;D S1244A	20.33	-0.37;-0.28	-0.65	0.39	0.02
B S979A;D S1260A	22.14	-0.03;-0.01	-0.04	0.39	-0.1
B D1095A;D D1376A	29.22	-0.02;0.12	0.1	0.4	-0.49
B K993A;D K1274A	27.2	0.01;-0.03	-0.02	0.41	-0.3
B D996A;D D1277A	29.06	-0.01;0.18	0.17	0.43	-0.26
B K971A;D K1252A	19.63	0.02;-0.18	-0.16	0.48	-0.45
B S973A;D S1254A	22.72	-0.12;-0.18	-0.3	0.48	0.28
B S1008A;D S1289A	31.9	-0.39;-0.01	-0.4	0.48	0.18
B S1083A;D S1364A	60.87	0.05;0.05	0.1	0.48	-0.52
B S940A;D S1221A	30.6	0.02;0.02	0.04	0.51	-0.37
B N1068A;D N1349A	49.18	0.02;-0.29	-0.27	0.51	-0.24
B N1111A;D N1392A	34.7	0.09;0.02	0.11	0.52	-0.84
B Q1100A;D Q1381A	36.49	-0.0;0.03	0.03	0.64	-1.29
B N1124A;D N1405A	61.42	-0.03;-0.05	-0.08	0.65	-0.94
B S1125A;D S1406A	65.6	0.11;-0.02	0.09	0.72	-0.3
B K1059A;D K1340A	43.17	-0.17;-0.06	-0.23	0.75	-1.77
B N960A;D N1241A	24.44	-0.05;0.06	0.01	0.77	-0.58
B D1075A;D D1356A	50.42	0.27;0.15	0.42	0.79	-1.46
B N1108A;D N1389A	38.81	0.1;-0.09	0.01	0.82	-0.55
B K1014A;D K1295A	37.95	-0.02;-0.07	-0.09	0.83	-0.79
B K1097A;D K1378A	29.75	0.21;0.02	0.23	0.83	-0.96
B D984A;D D1265A	26.33	0.05;-0.21	-0.16	0.86	-0.1
B M1106A;D M1387A	45.22	-0.67;-0.85	-1.52	0.87	-0.28
B N1050A;D N1331A	47.22	-0.82;-0.79	-1.61	0.88	-0.84
B K1004A;D K1285A	30.33	-0.01;-0.33	-0.34	0.9	-0.67
B N1072A;D N1353A	53.45	0.19;0.08	0.27	0.9	-1.05
B S1109A;D S1390A	38.77	0.05;-0.02	0.03	0.94	-0.68
B K1071A;D K1352A	50.34	-0.03;0.0	-0.03	1.16	-1.48
B S939A;D S1220A	28.11	-0.07;0.0	-0.07	1.31	-0.84
B S943A;D S1224A	28.16	0.02;0.03	0.05	1.72	-1.06
