# Supplementary material for: Bio-Chemoinformatics-Driven Analysis of nsp7 and nsp8 Mutations and Their Effects on Viral Replication Protein Complex Stability
Source: Curr Issues Mol Biol. 2024 Mar 18;46(3):2598–619. doi: 10.3390/cimb46030165 (PMC10968879; doi:10.3390/cimb46030165)
Supplement: Supplementary file 1 [file cimb-46-00165-s001.zip › Supplementary Dataset S9. Statistics of amino acid contributions to viral replication protein complex stability.xlsx]

## Sheet: A chain NSP12
		Frequency	%	Valid %	Mean	Median	Mode	Sum	Std. Deviation	Variance	Minimum	Maximum	Range	Quartile 1	Quartile 2	Quartile 3	Interquartile Range	Median absolute deviation	Skew	Kurtosis	Number of valid values	95% Confidence interval of Mean	Mean ± Std.
	L	83	0.0956	0.0956	-2.52	-2.74	-2.93	-208.81	0.63	0.4	-3.65	-0.79	2.86	-2.97	-2.74	-2.12	0.86	0.38	0.77	0.11	83	-2.65; -2.38	-2.52 ± 0.63
	D	75	0.0864	0.0864	-0.19	0.02	0.08	-13.88	0.55	0.3	-1.74	0.73	2.47	-0.5	0.02	0.16	0.66	0.29	-0.88	0.27	75	-0.31; -0.06	-0.19 ± 0.55
	V	74	0.0853	0.0853	-1.68	-1.72	-2.19	-124.01	0.65	0.42	-2.87	0.03	2.9	-2.19	-1.72	-1.26	0.93	0.47	0.41	-0.19	74	-1.82; -1.53	-1.68 ± 0.65
	T	61	0.0703	0.0703	-0.54	-0.46	-0.46	-32.66	0.53	0.28	-2.05	0.58	2.63	-0.94	-0.46	-0.16	0.78	0.36	-0.54	-0.01	61	-0.67; -0.4	-0.54 ± 0.53
	Y	58	0.0668	0.0668	-2.42	-2.39	-1.88	-140.57	0.63	0.4	-3.81	-0.5	3.31	-2.9	-2.39	-2.06	0.85	0.42	0.46	0.63	58	-2.59; -2.26	-2.42 ± 0.63
	F	57	0.0657	0.0657	-2.48	-2.41	-2.95	-141.21	0.55	0.31	-3.83	-1.06	2.77	-2.9	-2.41	-2.12	0.78	0.39	0.21	0.06	57	-2.62; -2.33	-2.48 ± 0.55
	N	56	0.0645	0.0645	-0.84	-0.69	-0.47	-46.98	0.77	0.6	-2.47	0.15	2.62	-1.38	-0.69	-0.15	1.23	0.62	-0.51	-0.99	56	-1.04; -0.64	-0.84 ± 0.77
	S	53	0.0611	0.0611	-0.38	-0.12	0.04	-20.24	1.57	2.45	-11.37	0.71	12.08	-0.39	-0.12	0.04	0.43	0.18	-6.88	49.08	53	-0.8; 0.04	-0.38 ± 1.57
	K	51	0.0588	0.0588	-0.21	-0.04	-0.03	-10.48	0.36	0.13	-1.3	0.23	1.53	-0.38	-0.04	0.05	0.43	0.14	-1.42	1.55	51	-0.3; -0.11	-0.21 ± 0.36
	G	45	0.0518	0.0518	-0.33	-0.37	-0.18	-14.78	0.4	0.16	-1.09	0.64	1.73	-0.61	-0.37	-0.05	0.56	0.26	0.4	-0.27	45	-0.45; -0.21	-0.33 ± 0.4
	R	43	0.0495	0.0495	-0.96	-1.05	-1.64	-41.08	0.6	0.36	-2.09	0.07	2.16	-1.38	-1.05	-0.55	0.83	0.41	-0.16	-0.8	43	-1.13; -0.78	-0.96 ± 0.6
	I	33	0.038	0.038	-2.32	-2.29	-3.28	-76.59	0.66	0.44	-3.38	-1.13	2.25	-2.73	-2.29	-1.8	0.93	0.45	-0.05	-1.05	33	-2.55; -2.1	-2.32 ± 0.66
	E	31	0.0357	0.0357	-0.11	-0.05	0.07	-3.31	0.25	0.06	-0.78	0.3	1.08	-0.22	-0.05	0.06	0.27	0.12	-0.81	0.63	31	-0.19; -0.02	-0.11 ± 0.25
	P	30	0.0346	0.0346	-0.6	-0.55	-1.06	-18.03	0.52	0.27	-1.54	0.22	1.76	-1.03	-0.55	-0.15	0.88	0.45	-0.26	-1.17	30	-0.79; -0.41	-0.6 ± 0.52
	C	29	0.0334	0.0334	-1.36	-1.11	-1.38	-39.42	0.88	0.77	-3.63	-0.06	3.57	-1.43	-1.11	-0.94	0.49	0.32	-1.35	1.47	29	-1.68; -1.04	-1.36 ± 0.88
	Q	28	0.0323	0.0323	-0.24	-0.06	0.02	-6.82	0.41	0.17	-1.34	0.31	1.65	-0.47	-0.06	0.02	0.5	0.19	-1.28	1.12	28	-0.4; -0.09	-0.24 ± 0.41
	H	27	0.0311	0.0311	-1.01	-1.11	-2.02	-27.22	0.78	0.61	-2.47	0.55	3.02	-1.51	-1.11	-0.47	1.04	0.55	0.13	-0.67	27	-1.3; -0.71	-1.01 ± 0.78
	M	25	0.0288	0.0288	-2.03	-2.09	-1.97	-50.78	0.82	0.67	-3.37	-0.2	3.17	-2.56	-2.09	-1.76	0.8	0.47	0.75	0.33	25	-2.35; -1.71	-2.03 ± 0.82
	W	9	0.0104	0.0104	-2.33	-2.11	-3.11	-20.97	0.75	0.56	-3.11	-1.15	1.96	-3.07	-2.11	-1.79	1.28	0.87	0.23	-1.61	9	-2.82; -1.84	-2.33 ± 0.75

## Sheet: B chain NSP8
		Frequency	%	Valid %	Mean	Median	Mode	Sum	Std. Deviation	Variance	Minimum	Maximum	Range	Quartile 1	Quartile 2	Quartile 3	Interquartile Range	Median absolute deviation	Skew	Kurtosis	Number of valid values	95% Confidence interval of Mean	Mean ± Std.
	L	18	0.1059	0.1059	-2.33	-2.28	-2.96	-41.92	0.41	0.17	-2.96	-1.69	1.27	-2.72	-2.28	-2.05	0.67	0.41	-0.06	-1.28	18	-2.52; -2.14	-2.33 ± 0.41
	S	15	0.0882	0.0882	-0.09	-0.03	0.02	-1.29	0.2	0.04	-0.55	0.12	0.67	-0.11	-0.03	0.05	0.16	0.08	-1.3	0.86	15	-0.19; 0.01	-0.09 ± 0.2
	K	15	0.0882	0.0882	-0.01	0	-0.17	-0.21	0.11	0.01	-0.25	0.2	0.45	-0.02	0	0.03	0.05	0.03	-0.38	0.74	15	-0.07; 0.04	-0.01 ± 0.11
	V	13	0.0765	0.0765	-1.47	-2.08	-2.4	-19.05	0.91	0.83	-2.4	0.01	2.41	-2.19	-2.08	-0.79	1.4	0.32	0.7	-1.24	13	-1.96; -0.97	-1.47 ± 0.91
	D	13	0.0765	0.0765	-0.21	-0.12	-1.07	-2.74	0.44	0.19	-1.07	0.52	1.59	-0.33	-0.12	0.05	0.38	0.18	-0.63	0.34	13	-0.45; 0.03	-0.21 ± 0.44
	N	13	0.0765	0.0765	-0.1	0.02	0.1	-1.26	0.33	0.11	-0.82	0.19	1.01	-0.05	0.02	0.1	0.15	0.08	-1.8	2.18	13	-0.28; 0.08	-0.1 ± 0.33
	T	13	0.0765	0.0765	-0.28	-0.35	-0.62	-3.65	0.24	0.06	-0.62	0.08	0.7	-0.44	-0.35	-0.06	0.38	0.26	-0.02	-1.55	13	-0.41; -0.15	-0.28 ± 0.24
	Q	11	0.0647	0.0647	-0.06	0	0	-0.63	0.13	0.02	-0.3	0.1	0.4	-0.14	0	0.02	0.16	0.06	-0.83	-0.5	11	-0.13; 0.02	-0.06 ± 0.13
	I	10	0.0588	0.0588	-2.08	-2.23	-2.46	-20.83	0.76	0.58	-2.8	-0.2	2.6	-2.46	-2.23	-2.16	0.3	0.23	1.95	4.16	10	-2.56; -1.61	-2.08 ± 0.76
	M	9	0.0529	0.0529	-1.77	-1.57	-3.25	-15.89	0.78	0.61	-3.25	-0.61	2.64	-1.92	-1.57	-1.48	0.44	0.35	-0.74	0.72	9	-2.28; -1.25	-1.77 ± 0.78
	E	9	0.0529	0.0529	-0.1	-0.03	-0.5	-0.89	0.2	0.04	-0.5	0.09	0.59	-0.17	-0.03	0.03	0.2	0.08	-1.31	0.82	9	-0.23; 0.03	-0.1 ± 0.2
	R	7	0.0412	0.0412	-0.71	-0.65	-1.61	-4.97	0.48	0.23	-1.61	-0.03	1.58	-0.82	-0.65	-0.51	0.31	0.22	-0.81	2.08	7	-1.07; -0.35	-0.71 ± 0.48
	Y	6	0.0353	0.0353	-2.18	-2.2	-2.62	-13.1	0.39	0.15	-2.62	-1.56	1.06	-2.47	-2.2	-2.01	0.46	0.3	0.58	-0.09	6	-2.5; -1.87	-2.18 ± 0.39
	P	6	0.0353	0.0353	-0.77	-1.09	-1.33	-4.65	0.63	0.4	-1.33	0.05	1.38	-1.19	-1.09	-0.25	0.94	0.18	0.86	-1.86	6	-1.28; -0.27	-0.77 ± 0.63
	F	5	0.0294	0.0294	-1.86	-1.69	-2.48	-9.28	0.45	0.21	-2.48	-1.33	1.15	-2.14	-1.69	-1.64	0.5	0.36	-0.47	-0.95	5	-2.25; -1.46	-1.86 ± 0.45
	G	3	0.0176	0.0176	-0.44	-0.3	-0.91	-1.33	0.41	0.17	-0.91	-0.12	0.79	-0.6	-0.3	-0.21	0.4	0.18	-1.37		3	-0.91; 0.03	-0.44 ± 0.41
	W	2	0.0118	0.0118	-2.12	-2.12	-2.44	-4.24	0.45	0.2	-2.44	-1.8	0.64	-2.28	-2.12	-1.96	0.32	0.32			2	-2.75; -1.49	-2.12 ± 0.45
	C	2	0.0118	0.0118	-1.39	-1.39	-1.76	-2.79	0.52	0.27	-1.76	-1.03	0.73	-1.58	-1.39	-1.21	0.37	0.37			2	-2.11; -0.68	-1.39 ± 0.52

## Sheet: C chain NSP7
		Frequency	%	Valid %	Mean	Median	Mode	Sum	Std. Deviation	Variance	Minimum	Maximum	Range	Quartile 1	Quartile 2	Quartile 3	Interquartile Range	Median absolute deviation	Skew	Kurtosis	Number of valid values	95% Confidence interval of Mean	Mean ± Std.
	L	15	0.1923	0.1923	-2.56	-2.68	-3.37	-38.4	0.58	0.34	-3.37	-1.4	1.97	-2.91	-2.68	-2.52	0.39	0.18	1.04	0.26	15	-2.85; -2.27	-2.56 ± 0.58
	S	10	0.1282	0.1282	-0.26	-0.25	-0.61	-2.59	0.22	0.05	-0.61	0.05	0.66	-0.43	-0.25	-0.1	0.34	0.18	-0.07	-1.3	10	-0.4; -0.12	-0.26 ± 0.22
	V	9	0.1154	0.1154	-1.73	-1.82	-2.12	-15.61	0.3	0.09	-2.12	-1.33	0.79	-1.96	-1.82	-1.43	0.53	0.24	0.27	-1.56	9	-1.93; -1.54	-1.73 ± 0.3
	K	6	0.0769	0.0769	-0.23	-0.02	-0.76	-1.41	0.38	0.14	-0.76	0.05	0.81	-0.52	-0.02	0.02	0.54	0.06	-0.96	-1.76	6	-0.54; 0.07	-0.23 ± 0.38
	Q	6	0.0769	0.0769	-0.1	-0.09	-0.28	-0.58	0.12	0.02	-0.28	0.06	0.34	-0.16	-0.09	-0.02	0.15	0.09	-0.32	-0.49	6	-0.19; 0	-0.1 ± 0.12
	D	5	0.0641	0.0641	-0.4	-0.1	-1.21	-1.98	0.74	0.54	-1.21	0.37	1.58	-1.15	-0.1	0.11	1.26	0.47	-0.38	-2.95	5	-1.04; 0.25	-0.4 ± 0.74
	E	5	0.0641	0.0641	0.07	0.09	-0.21	0.34	0.19	0.04	-0.21	0.25	0.46	-0.02	0.09	0.23	0.25	0.14	-0.72	-0.55	5	-0.1; 0.23	0.07 ± 0.19
	M	4	0.0513	0.0513	-1.43	-1.79	-2.31	-5.71	1.12	1.24	-2.31	0.19	2.5	-2.06	-1.79	-1.16	0.9	0.35	1.62	2.74	4	-2.52; -0.33	-1.43 ± 1.12
	T	4	0.0513	0.0513	-0.52	-0.19	-1.7	-2.07	0.8	0.63	-1.7	0.02	1.72	-0.61	-0.19	-0.1	0.51	0.14	-1.88	3.63	4	-1.3; 0.26	-0.52 ± 0.8
	C	3	0.0385	0.0385	-0.69	-0.78	-1.12	-2.08	0.48	0.23	-1.12	-0.18	0.94	-0.95	-0.78	-0.48	0.47	0.34	0.79		3	-1.23; -0.15	-0.69 ± 0.48
	N	3	0.0385	0.0385	-0.73	-0.92	-0.96	-2.19	0.36	0.13	-0.96	-0.31	0.65	-0.94	-0.92	-0.61	0.32	0.04	1.71		3	-1.14; -0.32	-0.73 ± 0.36
	I	2	0.0256	0.0256	-2.22	-2.22	-2.37	-4.44	0.21	0.05	-2.37	-2.07	0.3	-2.29	-2.22	-2.14	0.15	0.15			2	-2.51; -1.93	-2.22 ± 0.21
	R	2	0.0256	0.0256	0.17	0.17	-0.15	0.34	0.45	0.2	-0.15	0.49	0.64	0.01	0.17	0.33	0.32	0.32			2	-0.46; 0.8	0.17 ± 0.45
	W	1	0.0128	0.0128	-3.21	-3.21	-3.21	-3.21	NaN		-3.21	-3.21	0	-3.21	-3.21	-3.21	0	0			1	NaN; NaN	-3.21 ± NaN
	F	1	0.0128	0.0128	-2.93	-2.93	-2.93	-2.93	NaN		-2.93	-2.93	0	-2.93	-2.93	-2.93	0	0			1	NaN; NaN	-2.93 ± NaN
	H	1	0.0128	0.0128	-0.75	-0.75	-0.75	-0.75	NaN		-0.75	-0.75	0	-0.75	-0.75	-0.75	0	0			1	NaN; NaN	-0.75 ± NaN
	G	1	0.0128	0.0128	-0.05	-0.05	-0.05	-0.05	NaN		-0.05	-0.05	0	-0.05	-0.05	-0.05	0	0			1	NaN; NaN	-0.05 ± NaN

## Sheet: D chain NSP8
		Frequency	%	Valid %	Mean	Median	Mode	Sum	Std. Deviation	Variance	Minimum	Maximum	Range	Quartile 1	Quartile 2	Quartile 3	Interquartile Range	Median absolute deviation	Skew	Kurtosis	Number of valid values	95% Confidence interval of Mean	Mean ± Std.
	L	18	0.1059	0.1059	-2.26	-2.51	-2.93	-40.71	0.7	0.5	-3.14	-0.17	2.97	-2.64	-2.51	-1.87	0.78	0.42	1.55	3.48	18	-2.59; -1.94	-2.26 ± 0.7
	S	15	0.0882	0.0882	-0.07	-0.01	-0.01	-1.04	0.24	0.06	-0.85	0.1	0.95	-0.02	-0.01	0.04	0.06	0.04	-2.95	9.48	15	-0.19; 0.05	-0.07 ± 0.24
	K	15	0.0882	0.0882	-0.1	-0.07	-0.33	-1.48	0.12	0.02	-0.33	0.06	0.39	-0.18	-0.07	0	0.18	0.09	-0.77	-0.39	15	-0.16; -0.04	-0.1 ± 0.12
	T	13	0.0765	0.0765	-0.54	-0.49	-1.19	-7.03	0.41	0.17	-1.19	0.01	1.2	-0.85	-0.49	-0.2	0.65	0.36	-0.17	-1.29	13	-0.77; -0.32	-0.54 ± 0.41
	V	13	0.0765	0.0765	-1.42	-1.71	-2.68	-18.49	0.92	0.84	-2.68	-0.04	2.64	-2.17	-1.71	-0.53	1.64	0.7	0.31	-1.52	13	-1.92; -0.92	-1.42 ± 0.92
	N	13	0.0765	0.0765	-0.57	-0.29	-2.02	-7.47	0.68	0.46	-2.02	0.08	2.1	-1.04	-0.29	-0.05	0.99	0.35	-0.95	-0.16	13	-0.94; -0.2	-0.57 ± 0.68
	D	13	0.0765	0.0765	-0.14	-0.03	0.12	-1.78	0.37	0.14	-1.16	0.17	1.33	-0.25	-0.03	0.12	0.37	0.16	-1.97	4.41	13	-0.34; 0.06	-0.14 ± 0.37
	Q	11	0.0647	0.0647	-0.11	-0.03	-0.58	-1.21	0.19	0.03	-0.58	0.04	0.62	-0.18	-0.03	0.01	0.19	0.06	-1.86	3.74	11	-0.22; 0	-0.11 ± 0.19
	I	10	0.0588	0.0588	-2.43	-2.52	-3.05	-24.28	0.5	0.25	-3.05	-1.59	1.46	-2.79	-2.52	-2.22	0.57	0.28	0.83	-0.39	10	-2.74; -2.12	-2.43 ± 0.5
	E	9	0.0529	0.0529	-0.08	-0.05	-0.35	-0.74	0.17	0.03	-0.35	0.17	0.52	-0.19	-0.05	0.02	0.21	0.09	-0.39	-0.54	9	-0.19; 0.03	-0.08 ± 0.17
	M	9	0.0529	0.0529	-1.86	-1.79	-2.84	-16.72	0.66	0.44	-2.84	-0.85	1.99	-2.46	-1.79	-1.57	0.89	0.67	0.1	-0.84	9	-2.29; -1.42	-1.86 ± 0.66
	R	7	0.0412	0.0412	-1.13	-0.94	-1.83	-7.9	0.5	0.25	-1.83	-0.56	1.27	-1.44	-0.94	-0.84	0.61	0.13	-0.81	-0.99	7	-1.5; -0.76	-1.13 ± 0.5
	P	6	0.0353	0.0353	-0.56	-0.34	-1.52	-3.35	0.63	0.39	-1.52	0.03	1.55	-0.95	-0.34	-0.09	0.86	0.32	-0.8	-1.05	6	-1.06; -0.06	-0.56 ± 0.63
	Y	6	0.0353	0.0353	-2.79	-2.86	-3.25	-16.75	0.38	0.14	-3.25	-2.13	1.12	-2.96	-2.86	-2.71	0.25	0.15	1.05	2.02	6	-3.09; -2.49	-2.79 ± 0.38
	F	5	0.0294	0.0294	-2.16	-2.37	-3.09	-10.82	0.83	0.69	-3.09	-1.02	2.07	-2.69	-2.37	-1.65	1.04	0.72	0.5	-1.13	5	-2.89; -1.44	-2.16 ± 0.83
	G	3	0.0176	0.0176	-0.24	-0.15	-0.58	-0.73	0.3	0.09	-0.58	0	0.58	-0.36	-0.15	-0.07	0.29	0.15	-1.26		3	-0.58; 0.1	-0.24 ± 0.3
	C	2	0.0118	0.0118	-1.44	-1.44	-1.93	-2.88	0.69	0.48	-1.93	-0.95	0.98	-1.68	-1.44	-1.19	0.49	0.49			2	-2.4; -0.48	-1.44 ± 0.69
	W	2	0.0118	0.0118	-2.03	-2.03	-2.41	-4.06	0.54	0.29	-2.41	-1.65	0.76	-2.22	-2.03	-1.84	0.38	0.38			2	-2.77; -1.29	-2.03 ± 0.54

## Sheet: Both ala B and D
		Frequency	%	Valid %	Mean	Median	Mode	Sum	Std. Deviation	Variance	Minimum	Maximum	Range	Quartile 1	Quartile 2	Quartile 3	Interquartile Range	Median absolute deviation	Skew	Kurtosis	Number of valid values	95% Confidence interval of Mean	Mean ± Std.
	L	18	0.1059	0.1059	-1.04	-1	-2.79	-18.79	0.72	0.52	-2.79	0.02	2.81	-1.44	-1	-0.57	0.87	0.46	-0.63	0.55	18	-1.38; -0.71	-1.04 ± 0.72
	S	15	0.0882	0.0882	0.52	0.48	0.48	7.8	0.5	0.25	-0.33	1.72	2.05	0.24	0.48	0.62	0.38	0.24	0.99	1.58	15	0.27; 0.77	0.52 ± 0.5
	K	15	0.0882	0.0882	0.47	0.34	0.83	7.06	0.34	0.11	0.05	1.16	1.11	0.25	0.34	0.79	0.55	0.17	0.72	-0.69	15	0.3; 0.64	0.47 ± 0.34
	V	13	0.0765	0.0765	-1.45	-1.86	-3.18	-18.87	1.3	1.7	-3.18	0.34	3.52	-2.61	-1.86	-0.02	2.59	1.01	0.21	-1.7	13	-2.16; -0.74	-1.45 ± 1.3
	D	13	0.0765	0.0765	0.13	0.21	-1.07	1.65	0.52	0.27	-1.07	0.86	1.93	-0.04	0.21	0.4	0.44	0.22	-0.97	1.46	13	-0.16; 0.41	0.13 ± 0.52
	T	13	0.0765	0.0765	-0.21	-0.09	-0.85	-2.7	0.36	0.13	-0.85	0.22	1.07	-0.55	-0.09	0.08	0.63	0.18	-0.69	-0.99	13	-0.4; -0.01	-0.21 ± 0.36
	N	13	0.0765	0.0765	0.39	0.51	-0.43	5.05	0.43	0.18	-0.43	0.9	1.33	0.05	0.51	0.77	0.72	0.34	-0.49	-0.81	13	0.16; 0.62	0.39 ± 0.43
	Q	11	0.0647	0.0647	0.12	0.07	0.05	1.34	0.25	0.06	-0.38	0.64	1.02	0.04	0.07	0.2	0.16	0.04	0.21	2.1	11	-0.03; 0.27	0.12 ± 0.25
	I	10	0.0588	0.0588	-1.05	-1.34	-1.61	-10.5	0.7	0.5	-1.9	-0.15	1.75	-1.61	-1.34	-0.29	1.32	0.44	0.32	-2.02	10	-1.49; -0.61	-1.05 ± 0.7
	M	9	0.0529	0.0529	-1.33	-1.53	-1.53	-11.93	1.01	1.02	-2.67	0.87	3.54	-1.94	-1.53	-0.98	0.96	0.54	1.21	2.4	9	-1.99; -0.67	-1.33 ± 1.01
	E	9	0.0529	0.0529	-0.12	0.06	0.03	-1.08	0.51	0.26	-1.36	0.3	1.66	0.03	0.06	0.1	0.07	0.04	-2.18	4.84	9	-0.45; 0.21	-0.12 ± 0.51
	R	7	0.0412	0.0412	-0.62	-0.53	-2.1	-4.37	0.68	0.47	-2.1	-0.05	2.05	-0.6	-0.53	-0.24	0.36	0.27	-2.12	5.02	7	-1.13; -0.12	-0.62 ± 0.68
	Y	6	0.0353	0.0353	-3.21	-3.28	-4.17	-19.29	0.63	0.4	-4.17	-2.4	1.77	-3.46	-3.28	-2.79	0.67	0.43	-0.2	-0.2	6	-3.72; -2.71	-3.21 ± 0.63
	P	6	0.0353	0.0353	-0.79	-0.54	-2.67	-4.76	1.01	1.02	-2.67	0.08	2.75	-0.97	-0.54	-0.12	0.85	0.52	-1.58	2.7	6	-1.6; 0.02	-0.79 ± 1.01
	F	5	0.0294	0.0294	-3.08	-3.06	-4.1	-15.4	0.64	0.41	-4.1	-2.5	1.6	-3.15	-3.06	-2.59	0.56	0.47	-1.21	1.53	5	-3.64; -2.52	-3.08 ± 0.64
	G	3	0.0176	0.0176	0	0.03	-0.12	0.01	0.11	0.01	-0.12	0.1	0.22	-0.04	0.03	0.07	0.11	0.07	-1.01		3	-0.12; 0.13	0 ± 0.11
	W	2	0.0118	0.0118	-3.01	-3.01	-4.46	-6.02	2.05	4.21	-4.46	-1.56	2.9	-3.73	-3.01	-2.28	1.45	1.45			2	-5.85; -0.17	-3.01 ± 2.05
	C	2	0.0118	0.0118	-0.47	-0.47	-0.96	-0.94	0.69	0.48	-0.96	0.02	0.98	-0.71	-0.47	-0.22	0.49	0.49			2	-1.43; 0.49	-0.47 ± 0.69
